# Supplementary material for: miR-27 Negatively Regulates Pluripotency-Associated Genes in Human Embryonal Carcinoma Cells
Source: PLoS One. 2014 Nov 4;9(11):e111637. doi: 10.1371/journal.pone.0111637 (PMC4219743; doi:10.1371/journal.pone.0111637)
Supplement: Table S1 — Microarray-based transcriptome analysis 72 h after miRNA over-expression in NCCIT cells. Sheet A+B) Processed Data: The table represents statistical parameters for all Illumina probes. Bead-summary data have been generated with the Illumina BeadStudio for follow-up processing via the R/Bioconductor environment employing packages lumi, limma, qvalue and gplots. The quantile normalization algorithm was applied for normalization, limma p-value for determination of differential expression and qvalue for adjustment of the limma p-value for multiple testing. Differentially expressed genes where determined by the criteria: a) detection p-value <0.05 at least for treatment or control case, b) limma-q-value <0.05 and c) ratio <0.75 (for downregulation) or ratio >1.3333 (for upregulation). Genes significantly detectable (Detection Pvalue <0.01) are highlighted in red. Genes significant differentially expressed compared to the neg. control transfection (DiffPvalue <0.05), are highlighted in blue. The columns miR-X/neg. control represents the ratio between the AVG_Signal of miRNAs (let-7 and miR-27) compared to the AVG_Signal of the negative control. Genes more than 1.33-fold activated are highlighted in red, whereas genes less than 0.75-fold repressed are highlighted in green. Sheet C) sig. regulated genes The Table represents all significantly up- and down-regulated genes after miR-27 or let-7 over-expression in comparison to the neg. control transfection after 72 h in NCCIT cells with a Diff LimmaQval <0.05. The list of genes was used to screen for common up-and down-regulated genes presented in Figure 5c. D) DiffQ0.05common: The table provides a detailed list of common and unique >1.3333 fold up-regulated and <0.75 fold down-regulated genes (Official gene Symbol) by let-7 and miR-27 (Detection P-Value <0.05) of Figure 5C. (XLSX) [file pone.0111637.s001.xlsx]

## Sheet: A)mir27_vs_negcon.test_results
Name	SYMBOL	meanbgt	meanbgc	cvt	cvc	meant	stderrt	meanc	stderrc	ratio	ratiose	logratio	tp	t2p	wilcoxonp	tq	t2q	wilcoxonq	limmap	limmapa	DESCRIPTION
ILMN_1762337	7A5	0.676205	0.606928	0.00382136	NA	67.0121	0.181074	68.4753	NA	0.978631	NA	-0.0311628	2	2	2	2	2	2	0.83296	0.77079	Homo sapiens putative binding protein 7a5 (7A5), mRNA.
ILMN_2055271	A1BG	0.0459337	0.100904	0.0927549	NA	91.1657	5.97934	83.2308	NA	1.09534	NA	0.131374	2	2	2	2	2	2	0.404912	0.634258	Homo sapiens alpha-1-B glycoprotein (A1BG), mRNA.
ILMN_1779670	A1CF	0.585843	0.121988	0.02654	NA	68.5833	1.28708	81.9905	NA	0.83648	NA	-0.257598	2	2	2	2	2	2	0.0938242	0.344294	Homo sapiens APOBEC1 complementation factor (A1CF), transcript variant 3, mRNA.
ILMN_1806310	A1CF	0.164157	0.150602	0.0335697	NA	78.7686	1.86976	80.2508	NA	0.981531	NA	-0.0268947	2	2	2	2	2	2	0.854034	0.774145	Homo sapiens APOBEC1 complementation factor (A1CF), transcript variant 1, mRNA.
ILMN_2383229	A1CF	0.277861	0.439759	0.0610819	NA	75.1855	3.24737	71.7095	NA	1.04847	NA	0.0682916	2	2	2	2	2	2	0.655847	0.728376	Homo sapiens APOBEC1 complementation factor (A1CF), transcript variant 2, mRNA.
ILMN_1717783	A26C3	0.357681	0.76506	0.0531256	NA	72.9001	2.73853	65.0365	NA	1.12091	NA	0.164672	2	2	2	2	2	2	0.28061	0.559039	Homo sapiens ANKRD26-like family C, member 3 (A26C3), mRNA.
ILMN_1787689	A2BP1	0.378765	0.231928	0.138555	NA	75.0013	7.34812	77.0969	NA	0.972818	NA	-0.0397583	2	2	2	2	2	2	0.768305	0.754855	Homo sapiens ataxin 2-binding protein 1 (A2BP1), transcript variant 4, mRNA.
ILMN_1731507	A2BP1	0.652861	0.737952	0.117282	NA	66.2992	5.49824	65.6674	NA	1.00962	NA	0.0138126	2	2	2	2	2	2	0.954672	0.793313	Homo sapiens ataxin 2-binding protein 1 (A2BP1), transcript variant 3, mRNA.
ILMN_1814316	A2BP1	0.582831	0.75753	0.0274362	NA	68.6468	1.33177	65.3439	NA	1.05055	NA	0.0711409	2	2	2	2	2	2	0.63336	0.721166	Homo sapiens ataxin 2-binding protein 1 (A2BP1), transcript variant 1, mRNA.
ILMN_2359168	A2BP1	0.233434	0.673193	0.0472094	NA	75.9832	2.53648	67.2043	NA	1.13063	NA	0.177128	2	2	2	2	2	2	0.245172	0.530451	Homo sapiens ataxin 2-binding protein 1 (A2BP1), transcript variant 1, mRNA.
ILMN_1745607	A2M	0.748494	0.143072	0.0748982	NA	65.0206	3.44356	80.3491	NA	0.809227	NA	-0.305384	2	2	2	2	2	2	0.0529586	0.254303	Homo sapiens alpha-2-macroglobulin (A2M), mRNA.
ILMN_2136495	A2ML1	0.00376506	0	0.00655344	NA	116.892	0.541676	188.37	NA	0.620545	NA	-0.688393	2	2	2	2	2	2	0.000150159	0.00561459	Homo sapiens alpha-2-macroglobulin-like 1 (A2ML1), mRNA.
ILMN_2295559	A3GALT2	0.788404	0.582831	0.0489867	NA	64.5491	2.2359	69.0251	NA	0.935153	NA	-0.0967254	2	2	2	2	2	2	0.51506	0.681407	Homo sapiens alpha 1,3-galactosyltransferase 2 (A3GALT2), mRNA.
ILMN_1668111	A3GALT2	0.865211	0.933735	0.0571898	NA	62.4915	2.52711	60.1986	NA	1.03809	NA	0.0539316	2	2	2	2	2	2	0.724737	0.745061	Homo sapiens alpha 1,3-galactosyltransferase 2 (A3GALT2), mRNA.
ILMN_1735045	A4GALT	0	0	0.0468747	NA	176.397	5.84675	293.423	NA	0.601169	NA	-0.734157	2	2	2	2	2	2	8.06874e-05	0.00356737	Homo sapiens alpha 1,4-galactosyltransferase (A4GALT), mRNA.
ILMN_1680754	A4GNT	0.155873	0.240964	0.119295	NA	81.8931	6.90806	76.672	NA	1.0681	NA	0.095042	2	2	2	2	2	2	0.565404	0.698854	Homo sapiens alpha-1,4-N-acetylglucosaminyltransferase (A4GNT), mRNA.
ILMN_1673870	AAA1	0.621235	0.373494	0.0239706	NA	67.9194	1.15122	73.2972	NA	0.92663	NA	-0.109935	2	2	2	2	2	2	0.460117	0.658296	Homo sapiens AAA1 protein (AAA1), transcript variant IX, mRNA.
ILMN_2375184	AAA1	0.544428	0.317771	0.0371953	NA	69.3226	1.82326	74.7855	NA	0.926952	NA	-0.109433	2	2	2	2	2	2	0.462338	0.658831	Homo sapiens AAA1 protein (AAA1), transcript variant II, mRNA.
ILMN_1659452	AAA1	0.177711	0.141566	0.0410375	NA	78.2386	2.27032	80.6839	NA	0.969693	NA	-0.0444007	2	2	2	2	2	2	0.76234	0.753566	Homo sapiens AAA1 protein (AAA1), transcript variant VIII, mRNA.
ILMN_1767388	AAA1	0.618223	0.626506	0.11887	NA	67.4403	5.6686	68.1118	NA	0.990141	NA	-0.0142943	2	2	2	2	2	2	0.900769	0.783274	Homo sapiens AAA1 protein (AAA1), transcript variant III, mRNA.
ILMN_1675204	AAA1	0.904367	0.971386	0.158892	NA	57.7805	6.49186	56.7354	NA	1.01842	NA	0.0263333	2	2	2	2	2	2	0.915423	0.785512	Homo sapiens AAA1 protein (AAA1), transcript variant VII, mRNA.
ILMN_1755321	AAAS	0.000753012	0	0.100253	NA	164.754	11.6793	188.929	NA	0.87204	NA	-0.197534	2	2	2	2	2	2	0.199623	0.489587	Homo sapiens achalasia, adrenocortical insufficiency, alacrimia (Allgrove, triple-A) (AAAS), mRNA.
ILMN_1698554	AACS	0	0	0.015436	NA	305.443	3.33388	374.047	NA	0.81659	NA	-0.292316	2	2	2	2	2	2	0.059568	0.270878	Homo sapiens acetoacetyl-CoA synthetase (AACS), mRNA.
ILMN_1760414	AADAC	0.55497	0.75753	0.108098	NA	69.1284	5.28395	65.3545	NA	1.05774	NA	0.0809919	2	2	2	2	2	2	0.619939	0.717031	Homo sapiens arylacetamide deacetylase (esterase) (AADAC), mRNA.
ILMN_2061446	AADACL1	0.00225904	0	0.088882	NA	131.557	8.26824	183.53	NA	0.716816	NA	-0.480325	2	2	2	2	2	2	0.00455436	0.0562284	Homo sapiens arylacetamide deacetylase-like 1 (AADACL1), mRNA.
ILMN_1752884	AADACL2	0.426958	0.527108	0.0759686	NA	71.7232	3.85282	70.052	NA	1.02386	NA	0.0340127	2	2	2	2	2	2	0.832605	0.770663	Homo sapiens arylacetamide deacetylase-like 2 (AADACL2), mRNA.
ILMN_1668851	AADACL4	0.192018	0.174699	0.0572829	NA	77.7676	3.14999	78.8927	NA	0.985739	NA	-0.0207217	2	2	2	2	2	2	0.883582	0.780522	Homo sapiens arylacetamide deacetylase-like 4 (AADACL4), mRNA.
ILMN_2357031	AADAT	0.674699	0.379518	0.0100452	NA	67.1394	0.476893	73.0928	NA	0.91855	NA	-0.12257	2	2	2	2	2	2	0.41091	0.637048	Homo sapiens aminoadipate aminotransferase (AADAT), transcript variant 2, mRNA.
ILMN_1809959	AADAT	0.280873	0.260542	0.0681825	NA	74.9994	3.61589	76.2736	NA	0.983294	NA	-0.0243047	2	2	2	2	2	2	0.862834	0.776528	Homo sapiens aminoadipate aminotransferase (AADAT), transcript variant 2, mRNA.
ILMN_2270015	AADAT	0.0150602	0.0180723	0.188715	NA	110.279	14.7158	99.289	NA	1.11069	NA	0.15145	2	2	2	2	2	2	0.411524	0.637443	Homo sapiens aminoadipate aminotransferase (AADAT), transcript variant 1, mRNA.
ILMN_1689211	AAK1	0.652861	0.629518	0.0461965	NA	67.1522	2.19359	68.0468	NA	0.986853	NA	-0.0190923	2	2	2	2	2	2	0.893911	0.782326	Homo sapiens AP2 associated kinase 1 (AAK1), mRNA.
ILMN_1688755	AAK1	0.00301205	0.0316265	0.0271269	NA	124.746	2.39282	94.6578	NA	1.31786	NA	0.398196	2	2	2	2	2	2	0.0135577	0.113687	Homo sapiens AP2 associated kinase 1 (AAK1), mRNA.
ILMN_1653165	AAMP	0	0	0.0477677	NA	330.576	11.1658	364.158	NA	0.907781	NA	-0.139583	2	2	2	2	2	2	0.351665	0.606905	Homo sapiens angio-associated, migratory cell protein (AAMP), mRNA.
ILMN_1729835	AANAT	0.729669	0.293675	0.112283	NA	64.7138	5.13803	75.6262	NA	0.855706	NA	-0.224813	2	2	2	2	2	2	0.149718	0.431888	Homo sapiens arylalkylamine N-acetyltransferase (AANAT), mRNA.
ILMN_1662364	AARS	0	0	0.0152564	NA	3750.6	40.4611	2108.9	NA	1.77847	NA	0.830633	2	2	2	2	2	2	1.7661e-05	0.00111118	Homo sapiens alanyl-tRNA synthetase (AARS), mRNA.
ILMN_1674698	AARS2	0	0	0.101913	NA	219.007	15.7825	263.138	NA	0.832292	NA	-0.264839	2	2	2	2	2	2	0.0924339	0.342306	Homo sapiens alanyl-tRNA synthetase 2, mitochondrial (putative) (AARS2), nuclear gene encoding mitochondrial protein, mRNA.
ILMN_1700461	AARSD1	0	0	0.115414	NA	749.875	61.1971	662.776	NA	1.13141	NA	0.178128	2	2	2	2	2	2	0.271916	0.552124	Homo sapiens alanyl-tRNA synthetase domain containing 1 (AARSD1), mRNA.
ILMN_1784269	AASDH	0.00150602	0.0060241	0.136056	NA	139.905	13.4598	119.704	NA	1.16876	NA	0.224983	2	2	2	2	2	2	0.177801	0.466595	Homo sapiens aminoadipate-semialdehyde dehydrogenase (AASDH), mRNA.
ILMN_2096191	AASDHPPT	0	0	0.021331	NA	296.208	4.4678	237.914	NA	1.24502	NA	0.316173	2	2	2	2	2	2	0.0434464	0.22865	Homo sapiens aminoadipate-semialdehyde dehydrogenase-phosphopantetheinyl transferase (AASDHPPT), mRNA.
ILMN_2157219	AASS	0.00150602	0	0.0769291	NA	143.989	7.83258	174.126	NA	0.826926	NA	-0.27417	2	2	2	2	2	2	0.079476	0.315477	Homo sapiens aminoadipate-semialdehyde synthase (AASS), nuclear gene encoding mitochondrial protein, mRNA.
ILMN_1703743	AATF	0	0	0.0540477	NA	1385.54	52.952	1063.08	NA	1.30333	NA	0.382204	2	2	2	2	2	2	0.0181693	0.136014	Homo sapiens apoptosis antagonizing transcription factor (AATF), mRNA.
ILMN_2068874	AATK	0.240964	0.364458	0.0183021	NA	75.4976	0.977057	73.407	NA	1.02848	NA	0.0405122	2	2	2	2	2	2	0.784954	0.759198	Homo sapiens apoptosis-associated tyrosine kinase (AATK), mRNA.
ILMN_1687609	AATK	0.0414157	0.125	0.0601037	NA	92.629	3.9367	81.5986	NA	1.13518	NA	0.18292	2	2	2	2	2	2	0.234167	0.520642	Homo sapiens apoptosis-associated tyrosine kinase (AATK), mRNA.
ILMN_1805104	ABAT	0.256777	0.0316265	0.0636753	NA	75.5304	3.40077	94.6285	NA	0.798179	NA	-0.325217	2	2	2	2	2	2	0.0398926	0.217831	Homo sapiens 4-aminobutyrate aminotransferase (ABAT), nuclear gene encoding mitochondrial protein, transcript variant 2, mRNA.
ILMN_1670117	ABAT	0.28991	0.108434	0.0898265	NA	75.4527	4.79252	82.9259	NA	0.909881	NA	-0.136251	2	2	2	2	2	2	0.366031	0.614153	Homo sapiens 4-aminobutyrate aminotransferase (ABAT), nuclear gene encoding mitochondrial protein, transcript variant 1, mRNA.
ILMN_2404407	ABAT	0.292922	0.465361	0.0693249	NA	74.9058	3.67189	71.2301	NA	1.0516	NA	0.0725888	2	2	2	2	2	2	0.638624	0.72233	Homo sapiens 4-aminobutyrate aminotransferase (ABAT), nuclear gene encoding mitochondrial protein, transcript variant 2, mRNA.
ILMN_1766054	ABCA1	0	0	0.0494509	NA	248.063	8.67403	200.915	NA	1.23466	NA	0.304119	2	2	2	2	2	2	0.053326	0.255255	Homo sapiens ATP-binding cassette, sub-family A (ABC1), member 1 (ABCA1), mRNA.
ILMN_2070570	ABCA10	0.579819	0.965361	0.055555	NA	68.3963	2.68684	57.6415	NA	1.18658	NA	0.246812	2	2	2	2	2	2	0.112218	0.377267	Homo sapiens ATP-binding cassette, sub-family A (ABC1), member 10 (ABCA10), mRNA.
ILMN_2232084	ABCA11	0.115211	0.114458	0.197208	NA	89.2006	12.4388	82.4709	NA	1.0816	NA	0.113169	2	2	2	2	2	2	0.559351	0.69701	Homo sapiens ATP-binding cassette, sub-family A (ABC1), member 11 (pseudogene) (ABCA11) on chromosome 4.
ILMN_2361400	ABCA12	0.144578	0.0527108	0.0923608	NA	81.268	5.30753	89.1551	NA	0.911535	NA	-0.13363	2	2	2	2	2	2	0.375153	0.618888	Homo sapiens ATP-binding cassette, sub-family A (ABC1), member 12 (ABCA12), transcript variant 2, mRNA.
ILMN_1750250	ABCA12	0.703313	0.656627	0.117938	NA	65.1947	5.43688	67.6014	NA	0.964398	NA	-0.0522989	2	2	2	2	2	2	0.712857	0.742612	Homo sapiens ATP-binding cassette, sub-family A (ABC1), member 12 (ABCA12), transcript variant 1, mRNA.
ILMN_1704579	ABCA13	0.579066	0.728916	0.103719	NA	68.445	5.01977	66.1135	NA	1.03526	NA	0.0499984	2	2	2	2	2	2	0.764553	0.753636	Homo sapiens ATP-binding cassette, sub-family A (ABC1), member 13 (ABCA13), mRNA.
ILMN_1687636	ABCA2	0.353916	0.700301	0.00592416	NA	72.6024	0.304132	66.7375	NA	1.08788	NA	0.121519	2	2	2	2	2	2	0.414927	0.638921	Homo sapiens ATP-binding cassette, sub-family A (ABC1), member 2 (ABCA2), transcript variant 2, mRNA.
ILMN_1747627	ABCA2	0.0436747	0.200301	0.0392711	NA	91.8997	2.55195	77.9312	NA	1.17924	NA	0.237859	2	2	2	2	2	2	0.122116	0.392849	Homo sapiens ATP-binding cassette, sub-family A (ABC1), member 2 (ABCA2), transcript variant 2, mRNA.
ILMN_1758523	ABCA3	0.0331325	0.0286145	0.0882263	NA	95.0715	5.93108	96.6233	NA	0.98394	NA	-0.0233572	2	2	2	2	2	2	0.863445	0.776798	Homo sapiens ATP-binding cassette, sub-family A (ABC1), member 3 (ABCA3), mRNA.
ILMN_1794965	ABCA4	0.0308735	0.0828313	0.225998	NA	104.784	16.745	84.6075	NA	1.23847	NA	0.308563	2	2	2	2	2	2	0.109679	0.372111	Homo sapiens ATP-binding cassette, sub-family A (ABC1), member 4 (ABCA4), mRNA.
ILMN_1784176	ABCA5	0.850151	0.51506	0.0928357	NA	61.7028	4.05046	70.2239	NA	0.878658	NA	-0.186626	2	2	2	2	2	2	0.222932	0.509869	Homo sapiens ATP-binding cassette, sub-family A (ABC1), member 5 (ABCA5), transcript variant 1, mRNA.
ILMN_1722286	ABCA5	0.619729	0.673193	0.140509	NA	67.0926	6.66599	67.2442	NA	0.997746	NA	-0.00325565	2	2	2	2	2	2	0.94769	0.791548	Homo sapiens ATP-binding cassette, sub-family A (ABC1), member 5 (ABCA5), transcript variant 2, mRNA.
ILMN_1749001	ABCA5	0.167922	0.444277	0.00800131	NA	78.3763	0.443436	71.6239	NA	1.09428	NA	0.129977	2	2	2	2	2	2	0.383904	0.623071	Homo sapiens ATP-binding cassette, sub-family A (ABC1), member 5 (ABCA5), transcript variant 1, mRNA.
ILMN_1701551	ABCA6	0.395331	0.200301	0.0573392	NA	72.2161	2.928	77.8941	NA	0.927106	NA	-0.109193	2	2	2	2	2	2	0.463759	0.659593	Homo sapiens ATP-binding cassette, sub-family A (ABC1), member 6 (ABCA6), mRNA.
ILMN_1795507	ABCA6	0.0881024	0.240964	0.0516254	NA	83.9719	3.06537	76.6831	NA	1.09505	NA	0.130997	2	2	2	2	2	2	0.388275	0.626083	Homo sapiens ATP-binding cassette, sub-family A (ABC1), member 6 (ABCA6), mRNA.
ILMN_1743205	ABCA7	0.00828313	0.00150602	0.0222078	NA	107.694	1.69115	166.903	NA	0.64525	NA	-0.632069	2	2	2	2	2	2	0.000365002	0.0101925	Homo sapiens ATP-binding cassette, sub-family A (ABC1), member 7 (ABCA7), mRNA.
ILMN_2259319	ABCA7	0.846386	0.349398	0.0267034	NA	63.2667	1.19461	73.6901	NA	0.858551	NA	-0.220024	2	2	2	2	2	2	0.14828	0.430142	Homo sapiens ATP-binding cassette, sub-family A (ABC1), member 7 (ABCA7), transcript variant 2, mRNA.
ILMN_1729894	ABCA7	0.690512	0.957831	0.05235	NA	66.553	2.46359	58.2558	NA	1.14243	NA	0.192101	2	2	2	2	2	2	0.210068	0.498692	Homo sapiens ATP-binding cassette, sub-family A (ABC1), member 7 (ABCA7), mRNA.
ILMN_2129886	ABCA8	0.878765	0.78012	0.00592804	NA	62.6036	0.262419	64.5819	NA	0.969367	NA	-0.0448848	2	2	2	2	2	2	0.76144	0.753566	Homo sapiens ATP-binding cassette, sub-family A (ABC1), member 8 (ABCA8), mRNA.
ILMN_1720501	ABCA9	0.223645	0.409639	0.0130953	NA	76.2369	0.705936	72.1923	NA	1.05603	NA	0.0786451	2	2	2	2	2	2	0.596296	0.709156	Homo sapiens ATP-binding cassette, sub-family A (ABC1), member 9 (ABCA9), mRNA.
ILMN_1668446	ABCA9	0.0368976	0.114458	0.00446889	NA	91.62	0.289518	82.378	NA	1.11219	NA	0.153404	2	2	2	2	2	2	0.305874	0.577359	Homo sapiens ATP-binding cassette, sub-family A (ABC1), member 9 (ABCA9), mRNA.
ILMN_2094875	ABCB1	0.918675	0.932229	0.0125818	NA	60.9824	0.542542	60.4889	NA	1.00816	NA	0.0117223	2	2	2	2	2	2	0.937086	0.789168	Homo sapiens ATP-binding cassette, sub-family B (MDR/TAP), member 1 (ABCB1), mRNA.
ILMN_1665730	ABCB10	0	0	0.180559	NA	229.404	29.2889	229.513	NA	0.999525	NA	-0.000685332	2	2	2	2	2	2	0.939615	0.789603	Homo sapiens ATP-binding cassette, sub-family B (MDR/TAP), member 10 (ABCB10), nuclear gene encoding mitochondrial protein, mRNA.
ILMN_2232066	ABCB11	0.374247	0.728916	0.0776242	NA	73.0523	4.00974	66.1554	NA	1.10425	NA	0.143071	2	2	2	2	2	2	0.356685	0.609147	Homo sapiens ATP-binding cassette, sub-family B (MDR/TAP), member 11 (ABCB11), mRNA.
ILMN_1767349	ABCB4	0.567018	0.876506	0.0108746	NA	68.78	0.528882	62.383	NA	1.10254	NA	0.140836	2	2	2	2	2	2	0.346445	0.603602	Homo sapiens ATP-binding cassette, sub-family B (MDR/TAP), member 4 (ABCB4), transcript variant C, mRNA.
ILMN_1658257	ABCB5	0.749247	0.447289	0.0292355	NA	65.5274	1.35462	71.5159	NA	0.916263	NA	-0.126166	2	2	2	2	2	2	0.397932	0.631414	Homo sapiens ATP-binding cassette, sub-family B (MDR/TAP), member 5 (ABCB5), mRNA.
ILMN_2193980	ABCB6	0	0	0.0525472	NA	260.388	9.6751	326.782	NA	0.796826	NA	-0.327663	2	2	2	2	2	2	0.0379815	0.211574	Homo sapiens ATP-binding cassette, sub-family B (MDR/TAP), member 6 (ABCB6), nuclear gene encoding mitochondrial protein, mRNA.
ILMN_1687840	ABCB7	0.00150602	0	0.233808	NA	161.784	26.7472	238.117	NA	0.67943	NA	-0.557604	2	2	2	2	2	2	0.00369705	0.048586	Homo sapiens ATP-binding cassette, sub-family B (MDR/TAP), member 7 (ABCB7), nuclear gene encoding mitochondrial protein, mRNA.
ILMN_2102422	ABCB8	0.0165663	0.0572289	0.121682	NA	105.145	9.0469	88.2999	NA	1.19077	NA	0.25189	2	2	2	2	2	2	0.125871	0.397867	Homo sapiens ATP-binding cassette, sub-family B (MDR/TAP), member 8 (ABCB8), nuclear gene encoding mitochondrial protein, mRNA.
ILMN_2343048	ABCB9	0	0	0.0912207	NA	235.595	15.1965	256.771	NA	0.91753	NA	-0.124173	2	2	2	2	2	2	0.408342	0.635926	Homo sapiens ATP-binding cassette, sub-family B (MDR/TAP), member 9 (ABCB9), transcript variant 2, mRNA.
ILMN_1788928	ABCB9	0.252259	0.39006	0.0470389	NA	75.8787	2.52384	72.69	NA	1.04387	NA	0.0619395	2	2	2	2	2	2	0.682136	0.735029	Homo sapiens ATP-binding cassette, sub-family B (MDR/TAP), member 9 (ABCB9), transcript variant 4, mRNA.
ILMN_2343047	ABCB9	0	0	0.101084	NA	253.38	18.1108	222.619	NA	1.13818	NA	0.186727	2	2	2	2	2	2	0.241726	0.527259	Homo sapiens ATP-binding cassette, sub-family B (MDR/TAP), member 9 (ABCB9), transcript variant 2, mRNA.
ILMN_2335302	ABCC1	0.538404	0.623494	0.0460524	NA	69.2016	2.25348	68.187	NA	1.01488	NA	0.0213101	2	2	2	2	2	2	0.890285	0.781615	Homo sapiens ATP-binding cassette, sub-family C (CFTR/MRP), member 1 (ABCC1), transcript variant 6, mRNA.
ILMN_1802404	ABCC1	0.00150602	0.0120482	0.119185	NA	137.196	11.5625	107.29	NA	1.27874	NA	0.354722	2	2	2	2	2	2	0.0347037	0.200601	Homo sapiens ATP-binding cassette, sub-family C (CFTR/MRP), member 1 (ABCC1), transcript variant 5, mRNA.
ILMN_1776119	ABCC10	0.0105422	0.0150602	0.119199	NA	108.878	9.17695	105.233	NA	1.03464	NA	0.0491219	2	2	2	2	2	2	0.777777	0.757241	Homo sapiens ATP-binding cassette, sub-family C (CFTR/MRP), member 10 (ABCC10), mRNA.
ILMN_2358714	ABCC11	0.719127	0.439759	0.0327915	NA	66.364	1.53879	71.7207	NA	0.925311	NA	-0.11199	2	2	2	2	2	2	0.45206	0.654043	Homo sapiens ATP-binding cassette, sub-family C (CFTR/MRP), member 11 (ABCC11), transcript variant 3, mRNA.
ILMN_1732140	ABCC11	0.19503	0.15512	0.0354701	NA	77.4976	1.94373	79.7112	NA	0.97223	NA	-0.0406307	2	2	2	2	2	2	0.782121	0.758535	Homo sapiens ATP-binding cassette, sub-family C (CFTR/MRP), member 11 (ABCC11), transcript variant 2, mRNA.
ILMN_1713008	ABCC11	0.426958	0.487952	0.0209515	NA	71.2347	1.05534	70.6866	NA	1.00775	NA	0.0111431	2	2	2	2	2	2	0.940813	0.790091	Homo sapiens ATP-binding cassette, sub-family C (CFTR/MRP), member 11 (ABCC11), transcript variant 3, mRNA.
ILMN_1762093	ABCC12	0.0188253	0.128012	0.0650937	NA	98.6676	4.54149	81.289	NA	1.21379	NA	0.279517	2	2	2	2	2	2	0.0760941	0.307425	Homo sapiens ATP-binding cassette, sub-family C (CFTR/MRP), member 12 (ABCC12), mRNA.
ILMN_1774344	ABCC13	0.253765	0.0963855	0.0450914	NA	75.7878	2.41645	83.7317	NA	0.905127	NA	-0.143809	2	2	2	2	2	2	0.337545	0.598077	Homo sapiens ATP-binding cassette, sub-family C (CFTR/MRP), member 13 (ABCC13), transcript variant 2, mRNA.
ILMN_1709092	ABCC13	0.29744	0.712349	0.0244266	NA	74.0333	1.27872	66.5685	NA	1.11214	NA	0.153334	2	2	2	2	2	2	0.30778	0.578329	Homo sapiens ATP-binding cassette, sub-family C (CFTR/MRP), member 13 (ABCC13), transcript variant A, non-coding RNA. XR_017987 XR_017988 XR_017989
ILMN_1676278	ABCC2	0.00828313	0.0271084	0.0245405	NA	108.031	1.87465	97.1927	NA	1.11152	NA	0.152533	2	2	2	2	2	2	0.310265	0.580431	Homo sapiens ATP-binding cassette, sub-family C (CFTR/MRP), member 2 (ABCC2), mRNA.
ILMN_1677814	ABCC3	0.328313	0.402108	0.0324014	NA	73.2526	1.67831	72.4532	NA	1.01103	NA	0.0158314	2	2	2	2	2	2	0.917016	0.785635	Homo sapiens ATP-binding cassette, sub-family C (CFTR/MRP), member 3 (ABCC3), mRNA.
ILMN_2194009	ABCC4	0.0323795	0.0527108	0.157958	NA	99.4953	11.1129	89.1463	NA	1.11609	NA	0.158454	2	2	2	2	2	2	0.360354	0.611183	Homo sapiens ATP-binding cassette, sub-family C (CFTR/MRP), member 4 (ABCC4), mRNA.
ILMN_1706531	ABCC5	0	0	0.0477153	NA	1260.17	42.5179	1118.84	NA	1.12632	NA	0.171612	2	2	2	2	2	2	0.259856	0.542118	Homo sapiens ATP-binding cassette, sub-family C (CFTR/MRP), member 5 (ABCC5), transcript variant 1, mRNA.
ILMN_2302358	ABCC5	0.0715361	0.495482	0.0483894	NA	86.3949	2.95613	70.5269	NA	1.22499	NA	0.292772	2	2	2	2	2	2	0.0618517	0.276139	Homo sapiens ATP-binding cassette, sub-family C (CFTR/MRP), member 5 (ABCC5), transcript variant 2, mRNA.
ILMN_1651964	ABCC5	0	0	0.00960873	NA	373.168	2.53545	277.185	NA	1.34628	NA	0.428978	2	2	2	2	2	2	0.00839988	0.0850164	Homo sapiens ATP-binding cassette, sub-family C (CFTR/MRP), member 5 (ABCC5), transcript variant 2, mRNA.
ILMN_1778352	ABCC6	0.646084	0.301205	0.0636727	NA	67.2773	3.02905	75.4712	NA	0.891431	NA	-0.165806	2	2	2	2	2	2	0.272617	0.552577	Homo sapiens ATP-binding cassette, sub-family C (CFTR/MRP), member 6 (ABCC6), transcript variant 1, mRNA.
ILMN_2293902	ABCC6	0.254518	0.126506	0.0167111	NA	75.0847	0.887239	81.4845	NA	0.92146	NA	-0.118006	2	2	2	2	2	2	0.428305	0.644847	Homo sapiens ATP-binding cassette, sub-family C (CFTR/MRP), member 6 (ABCC6), transcript variant 2, mRNA.
ILMN_2406654	ABCC6	0.0768072	0.0436747	0.0326504	NA	84.7977	1.95775	90.9534	NA	0.93232	NA	-0.101103	2	2	2	2	2	2	0.496447	0.67428	Homo sapiens ATP-binding cassette, sub-family C (CFTR/MRP), member 6 (ABCC6), transcript variant 2, mRNA.
ILMN_1725414	ABCC6	0.0625	0.0105422	0.321221	NA	104.712	23.784	109.715	NA	0.954397	NA	-0.0673393	2	2	2	2	2	2	0.598771	0.710041	Homo sapiens ATP-binding cassette, sub-family C (CFTR/MRP), member 6 (ABCC6), transcript variant 1, mRNA.
ILMN_1801521	ABCC6	0.339608	0.606928	0.0162339	NA	72.9129	0.836976	68.4798	NA	1.06474	NA	0.0904949	2	2	2	2	2	2	0.5429	0.691997	Homo sapiens ATP-binding cassette, sub-family C (CFTR/MRP), member 6 (ABCC6), transcript variant 1, mRNA.
ILMN_1767129	ABCC8	0.614458	0.286145	0.0431517	NA	67.866	2.07078	75.7441	NA	0.89599	NA	-0.158446	2	2	2	2	2	2	0.292028	0.568415	Homo sapiens ATP-binding cassette, sub-family C (CFTR/MRP), member 8 (ABCC8), mRNA.
ILMN_1751453	ABCC9	0.874247	0.307229	0.0621216	NA	62.1375	2.72949	75.1374	NA	0.826985	NA	-0.274067	2	2	2	2	2	2	0.0781895	0.312348	Homo sapiens ATP-binding cassette, sub-family C (CFTR/MRP), member 9 (ABCC9), transcript variant SUR2B, mRNA.
ILMN_2366473	ABCC9	0.0926205	0.0707831	0.0311789	NA	83.2088	1.83449	85.9355	NA	0.96827	NA	-0.0465184	2	2	2	2	2	2	0.752198	0.752264	Homo sapiens ATP-binding cassette, sub-family C (CFTR/MRP), member 9 (ABCC9), transcript variant SUR2A-delta-14, mRNA.
ILMN_1772189	ABCD1	0.00225904	0.0060241	0.124847	NA	131.263	11.5879	115.551	NA	1.13597	NA	0.183927	2	2	2	2	2	2	0.262519	0.544229	Homo sapiens ATP-binding cassette, sub-family D (ALD), member 1 (ABCD1), mRNA.
ILMN_2198897	ABCD2	0.947289	0.78012	0.062494	NA	58.8645	2.60122	64.5865	NA	0.911405	NA	-0.133836	2	2	2	2	2	2	0.372144	0.617052	Homo sapiens ATP-binding cassette, sub-family D (ALD), member 2 (ABCD2), mRNA.
ILMN_2343917	ABCD4	0.277861	0.652108	0.0338024	NA	74.39	1.77806	67.6697	NA	1.09931	NA	0.136598	2	2	2	2	2	2	0.363953	0.612816	Homo sapiens ATP-binding cassette, sub-family D (ALD), member 4 (ABCD4), transcript variant 2, transcribed RNA.
ILMN_1651501	ABCD4	0.0384036	0.150602	0.0721167	NA	93.2908	4.75729	80.1798	NA	1.16352	NA	0.218496	2	2	2	2	2	2	0.161514	0.44725	Homo sapiens ATP-binding cassette, sub-family D (ALD), member 4 (ABCD4), transcript variant 2, mRNA.
ILMN_1676846	ABCE1	0	0	0.0593309	NA	603.933	25.337	610.522	NA	0.989207	NA	-0.0156559	2	2	2	2	2	2	0.909986	0.784834	Homo sapiens ATP-binding cassette, sub-family E (OABP), member 1 (ABCE1), transcript variant 2, mRNA.
ILMN_2330267	ABCE1	0	0	0.106915	NA	730.559	55.2303	718.281	NA	1.01709	NA	0.0244528	2	2	2	2	2	2	0.895149	0.782394	Homo sapiens ATP-binding cassette, sub-family E (OABP), member 1 (ABCE1), transcript variant 2, mRNA.
ILMN_2392635	ABCF1	0	0	0.0352486	NA	1102.49	27.479	1299.93	NA	0.848113	NA	-0.237671	2	2	2	2	2	2	0.120513	0.39083	Homo sapiens ATP-binding cassette, sub-family F (GCN20), member 1 (ABCF1), transcript variant 1, mRNA.
ILMN_1763875	ABCF1	0	0	0.0046324	NA	2484.29	8.13756	2593.54	NA	0.957877	NA	-0.0620877	2	2	2	2	2	2	0.674903	0.733485	Homo sapiens ATP-binding cassette, sub-family F (GCN20), member 1 (ABCF1), transcript variant 1, mRNA.
ILMN_2284941	ABCF2	0.762801	0.801205	0.0270044	NA	65.1733	1.24448	64.1495	NA	1.01596	NA	0.0228439	2	2	2	2	2	2	0.878855	0.780436	Homo sapiens ATP-binding cassette, sub-family F (GCN20), member 2 (ABCF2), nuclear gene encoding mitochondrial protein, transcript variant 2, mRNA.
ILMN_1669201	ABCF2	0	0.00301205	0.0457421	NA	171.914	5.56048	148.205	NA	1.15997	NA	0.21409	2	2	2	2	2	2	0.162904	0.448694	Homo sapiens ATP-binding cassette, sub-family F (GCN20), member 2 (ABCF2), nuclear gene encoding mitochondrial protein, transcript variant 1, mRNA.
ILMN_1781999	ABCF2	0	0	0.0279374	NA	765.487	15.122	587.264	NA	1.30348	NA	0.382369	2	2	2	2	2	2	0.0171264	0.131526	Homo sapiens ATP-binding cassette, sub-family F (GCN20), member 2 (ABCF2), nuclear gene encoding mitochondrial protein, transcript variant 2, mRNA.
ILMN_1810085	ABCF3	0	0	0.0358791	NA	334.162	8.47782	320.241	NA	1.04347	NA	0.0613925	2	2	2	2	2	2	0.682117	0.735029	Homo sapiens ATP-binding cassette, sub-family F (GCN20), member 3 (ABCF3), mRNA.
ILMN_1794782	ABCG1	0.0896084	0.0060241	0.0440198	NA	83.7339	2.60636	119.63	NA	0.699938	NA	-0.5147	2	2	2	2	2	2	0.00235681	0.0366419	Homo sapiens ATP-binding cassette, sub-family G (WHITE), member 1 (ABCG1), transcript variant 2, mRNA.
ILMN_1743638	ABCG1	0.14759	0.0286145	0.0996801	NA	81.3401	5.73321	96.6653	NA	0.841461	NA	-0.249031	2	2	2	2	2	2	0.111436	0.375925	Homo sapiens ATP-binding cassette, sub-family G (WHITE), member 1 (ABCG1), transcript variant 1, mRNA.
ILMN_1658176	ABCG1	0.0225904	0.0060241	0.185351	NA	105	13.7616	119.502	NA	0.878646	NA	-0.186645	2	2	2	2	2	2	0.240319	0.526046	Homo sapiens ATP-binding cassette, sub-family G (WHITE), member 1 (ABCG1), transcript variant 7, mRNA.
ILMN_2329927	ABCG1	0.669428	0.453313	0.0189296	NA	67.1597	0.898952	71.385	NA	0.94081	NA	-0.0880246	2	2	2	2	2	2	0.553017	0.69456	Homo sapiens ATP-binding cassette, sub-family G (WHITE), member 1 (ABCG1), transcript variant 2, mRNA.
ILMN_1695968	ABCG1	0.105422	0.0828313	0.212086	NA	90.9635	13.6416	84.9012	NA	1.0714	NA	0.0995028	2	2	2	2	2	2	0.629938	0.72011	Homo sapiens ATP-binding cassette, sub-family G (WHITE), member 1 (ABCG1), transcript variant 3, mRNA.
ILMN_2262362	ABCG1	0.366717	0.688253	0.0330848	NA	72.5227	1.69663	66.8821	NA	1.08434	NA	0.116813	2	2	2	2	2	2	0.436254	0.64725	Homo sapiens ATP-binding cassette, sub-family G (WHITE), member 1 (ABCG1), transcript variant 5, mRNA.
ILMN_1789641	ABCG2	0.4375	0.78012	0.0232962	NA	71.0349	1.17015	64.5647	NA	1.10021	NA	0.137781	2	2	2	2	2	2	0.358061	0.609847	Homo sapiens ATP-binding cassette, sub-family G (WHITE), member 2 (ABCG2), mRNA.
ILMN_1779470	ABCG4	0.0881024	0.0225904	0.0685576	NA	84.9657	4.11893	98.7515	NA	0.860399	NA	-0.216922	2	2	2	2	2	2	0.157132	0.44128	Homo sapiens ATP-binding cassette, sub-family G (WHITE), member 4 (ABCG4), mRNA.
ILMN_1716592	ABCG5	0.0361446	0.0948795	0.021869	NA	91.5944	1.41639	83.8911	NA	1.09183	NA	0.126743	2	2	2	2	2	2	0.396905	0.630623	Homo sapiens ATP-binding cassette, sub-family G (WHITE), member 5 (ABCG5), mRNA.
ILMN_1680309	ABCG8	0.322289	0.224398	0.0346233	NA	73.3877	1.7967	77.2925	NA	0.94948	NA	-0.0747911	2	2	2	2	2	2	0.613384	0.715049	Homo sapiens ATP-binding cassette, sub-family G (WHITE), member 8 (ABCG8), mRNA.
ILMN_1743371	ABHD1	0.226657	0.0496988	0.0171089	NA	76.0365	0.919877	89.5855	NA	0.848759	NA	-0.236573	2	2	2	2	2	2	0.121348	0.391662	Homo sapiens abhydrolase domain containing 1 (ABHD1), mRNA.
ILMN_1770031	ABHD10	0.000753012	0.0060241	0.137479	NA	156.713	15.2344	129.026	NA	1.21458	NA	0.28046	2	2	2	2	2	2	0.0959482	0.349117	Homo sapiens abhydrolase domain containing 10 (ABHD10), mRNA.
ILMN_2338268	ABHD11	0.00978916	0.0060241	0.0566568	NA	107.167	4.29337	133.145	NA	0.804888	NA	-0.31314	2	2	2	2	2	2	0.0465298	0.237089	Homo sapiens abhydrolase domain containing 11 (ABHD11), transcript variant 6, mRNA.
ILMN_1737475	ABHD11	0.00150602	0.00150602	0.197796	NA	151.261	21.1557	161.015	NA	0.939418	NA	-0.0901616	2	2	2	2	2	2	0.538587	0.690297	Homo sapiens abhydrolase domain containing 11 (ABHD11), transcript variant 1, mRNA.
ILMN_1753912	ABHD11	0.478916	0.364458	0.0163841	NA	70.3414	0.814925	73.4053	NA	0.95826	NA	-0.0615111	2	2	2	2	2	2	0.677591	0.734173	Homo sapiens abhydrolase domain containing 11 (ABHD11), transcript variant 4, mRNA.
ILMN_1745116	ABHD12	0.0105422	0.00903614	0.102424	NA	107.639	7.79573	111.091	NA	0.968929	NA	-0.0455365	2	2	2	2	2	2	0.748444	0.751037	Homo sapiens abhydrolase domain containing 12 (ABHD12), transcript variant 2, mRNA.
ILMN_2318685	ABHD12	0.000753012	0.0060241	0.00382448	NA	158.711	0.429206	128.033	NA	1.23961	NA	0.309886	2	2	2	2	2	2	0.0468992	0.238138	Homo sapiens abhydrolase domain containing 12 (ABHD12), transcript variant 1, mRNA.
ILMN_2245305	ABHD12	0	0	0.107174	NA	328.835	24.9202	234.711	NA	1.40102	NA	0.48648	2	2	2	2	2	2	0.00506302	0.0605287	Homo sapiens abhydrolase domain containing 12 (ABHD12), transcript variant 1, mRNA.
ILMN_2367487	ABHD12B	0.00828313	0	0.102916	NA	111.063	8.08234	321.561	NA	0.345387	NA	-1.53371	2	2	2	2	2	2	4.44412e-09	2.56586e-06	Homo sapiens abhydrolase domain containing 12B (ABHD12B), transcript variant 2, mRNA.
ILMN_1698311	ABHD12B	0.315512	0.141566	0.0508961	NA	73.9056	2.65979	80.5877	NA	0.917083	NA	-0.124876	2	2	2	2	2	2	0.403443	0.633473	Homo sapiens abhydrolase domain containing 12B (ABHD12B), transcript variant 2, mRNA.
ILMN_2073969	ABHD13	0.236446	0.593373	0.0264904	NA	75.976	1.42315	68.7396	NA	1.10527	NA	0.144402	2	2	2	2	2	2	0.336414	0.597166	Homo sapiens abhydrolase domain containing 13 (ABHD13), mRNA.
ILMN_1794213	ABHD14A	0.0173193	0.0301205	0.128439	NA	104.248	9.4678	94.8198	NA	1.09943	NA	0.13676	2	2	2	2	2	2	0.40893	0.636057	Homo sapiens abhydrolase domain containing 14A (ABHD14A), mRNA.
ILMN_2227533	ABHD14B	0.129518	0.504518	0.0378744	NA	80.8312	2.16476	70.3588	NA	1.14884	NA	0.200182	2	2	2	2	2	2	0.189094	0.477853	Homo sapiens abhydrolase domain containing 14B (ABHD14B), mRNA.
ILMN_1769390	ABHD15	0.745482	0.917169	0.171005	NA	62.4484	7.55118	60.9993	NA	1.02376	NA	0.0338732	2	2	2	2	2	2	0.887143	0.781261	Homo sapiens abhydrolase domain containing 15 (ABHD15), mRNA.
ILMN_1723662	ABHD2	0.0308735	0.0060241	0.0940007	NA	96.3078	6.40144	128.458	NA	0.74972	NA	-0.415576	2	2	2	2	2	2	0.0119944	0.105099	Homo sapiens abhydrolase domain containing 2 (ABHD2), transcript variant 2, mRNA.
ILMN_2403446	ABHD2	0.00753012	0.00903614	0.011224	NA	108.262	0.859229	111.148	NA	0.974036	NA	-0.0379533	2	2	2	2	2	2	0.797223	0.761525	Homo sapiens abhydrolase domain containing 2 (ABHD2), transcript variant 2, mRNA.
ILMN_1787618	ABHD2	0.481928	0.590361	0.204219	NA	73.4343	10.6043	68.783	NA	1.06762	NA	0.0944014	2	2	2	2	2	2	0.642755	0.723646	Homo sapiens abhydrolase domain containing 2 (ABHD2), transcript variant 1, mRNA.
ILMN_1801767	ABHD3	0	0.00451807	0.0148429	NA	177.686	1.86491	138.168	NA	1.28601	NA	0.362907	2	2	2	2	2	2	0.0223823	0.153519	Homo sapiens abhydrolase domain containing 3 (ABHD3), mRNA.
ILMN_1700633	ABHD4	0.00150602	0.00451807	0.00316588	NA	135.384	0.303072	138.866	NA	0.974921	NA	-0.0366421	2	2	2	2	2	2	0.804196	0.76307	Homo sapiens abhydrolase domain containing 4 (ABHD4), mRNA.
ILMN_1655702	ABHD5	0	0	0.0715009	NA	168.245	8.50628	238.019	NA	0.706856	NA	-0.500512	2	2	2	2	2	2	0.0031603	0.0444076	Homo sapiens abhydrolase domain containing 5 (ABHD5), mRNA.
ILMN_1706344	ABHD6	0.00301205	0.00301205	0.00534121	NA	127.955	0.48326	149.468	NA	0.856069	NA	-0.224201	2	2	2	2	2	2	0.14057	0.418854	Homo sapiens abhydrolase domain containing 6 (ABHD6), mRNA.
ILMN_1719498	ABHD7	0.0180723	0.0120482	0.0369447	NA	98.3013	2.56801	106.696	NA	0.921317	NA	-0.118231	2	2	2	2	2	2	0.427848	0.644731	Homo sapiens abhydrolase domain containing 7 (ABHD7), mRNA.
ILMN_1712707	ABHD8	0	0	0.0564707	NA	293.887	11.7351	237.705	NA	1.23635	NA	0.30609	2	2	2	2	2	2	0.052732	0.253898	Homo sapiens abhydrolase domain containing 8 (ABHD8), mRNA.
ILMN_1699750	ABHD9	0	0	0.0919309	NA	189.602	12.3251	227.879	NA	0.832032	NA	-0.26529	2	2	2	2	2	2	0.0905948	0.339395	Homo sapiens abhydrolase domain containing 9 (ABHD9), mRNA.
ILMN_2329958	ABI1	0.0271084	0.0060241	0.373464	NA	121.279	32.0274	125.12	NA	0.969305	NA	-0.0449778	2	2	2	2	2	2	0.653763	0.72773	Homo sapiens abl-interactor 1 (ABI1), transcript variant 3, mRNA.
ILMN_1739081	ABI1	0.42244	0.685241	0.00984428	NA	71.1224	0.49508	66.8923	NA	1.06324	NA	0.0884632	2	2	2	2	2	2	0.551393	0.694442	Homo sapiens abl-interactor 1 (ABI1), transcript variant 1, mRNA.
ILMN_1720988	ABI2	0.0060241	0.00451807	0.0625513	NA	115.274	5.09862	135.11	NA	0.853184	NA	-0.229071	2	2	2	2	2	2	0.135851	0.411787	PREDICTED: Homo sapiens abl interactor 2 (ABI2), mRNA.
ILMN_1724497	ABI2	0	0	0.0548496	NA	668.764	25.9377	636.223	NA	1.05115	NA	0.0719662	2	2	2	2	2	2	0.636221	0.721684	PREDICTED: Homo sapiens abl interactor 2 (ABI2), mRNA.
ILMN_1775944	ABI2	0.000753012	0.0060241	0.0670317	NA	149.503	7.08623	122.162	NA	1.22381	NA	0.291374	2	2	2	2	2	2	0.0656393	0.284801	PREDICTED: Homo sapiens abl interactor 2 (ABI2), mRNA.
ILMN_1755658	ABI3	0.325301	0.231928	0.00523976	NA	73.359	0.2718	77.0563	NA	0.952018	NA	-0.0709394	2	2	2	2	2	2	0.632028	0.720919	Homo sapiens ABI family, member 3 (ABI3), transcript variant 1, mRNA.
ILMN_1673639	ABI3BP	0.0805723	0.0572289	0.342547	NA	103.487	25.0664	88.3228	NA	1.17169	NA	0.228594	2	2	2	2	2	2	0.374838	0.618728	Homo sapiens ABI gene family, member 3 (NESH) binding protein (ABI3BP), mRNA.
ILMN_1713732	ABL1	0	0	0.067067	NA	593.355	28.139	628.165	NA	0.944585	NA	-0.0822468	2	2	2	2	2	2	0.57829	0.702926	Homo sapiens c-abl oncogene 1, receptor tyrosine kinase (ABL1), transcript variant a, mRNA.
ILMN_2268241	ABL1	0.23494	0.231928	0.100485	NA	77.3394	5.49526	77.1173	NA	1.00288	NA	0.00414822	2	2	2	2	2	2	0.997414	0.800302	Homo sapiens c-abl oncogene 1, receptor tyrosine kinase (ABL1), transcript variant a, mRNA.
ILMN_1708922	ABL1	0.00527108	0.0105422	0.108239	NA	114.698	8.77857	109.057	NA	1.05172	NA	0.0727477	2	2	2	2	2	2	0.657871	0.728963	Homo sapiens c-abl oncogene 1, receptor tyrosine kinase (ABL1), transcript variant b, mRNA.
ILMN_1741628	ABL2	0.0489458	0.0256024	0.0041306	NA	89.7698	0.262198	97.8273	NA	0.917636	NA	-0.124006	2	2	2	2	2	2	0.405513	0.634417	Homo sapiens v-abl Abelson murine leukemia viral oncogene homolog 2 (arg, Abelson-related gene) (ABL2), transcript variant b, mRNA.
ILMN_1657870	ABL2	0.808735	0.85994	0.0416426	NA	64.0545	1.88614	63.135	NA	1.01456	NA	0.0208612	2	2	2	2	2	2	0.891766	0.781836	Homo sapiens v-abl Abelson murine leukemia viral oncogene homolog 2 (arg, Abelson-related gene) (ABL2), transcript variant a, mRNA.
ILMN_2240003	ABL2	0.420181	0.590361	0.0332972	NA	71.4812	1.683	68.8194	NA	1.03868	NA	0.0547485	2	2	2	2	2	2	0.714539	0.742906	Homo sapiens v-abl Abelson murine leukemia viral oncogene homolog 2 (arg, Abelson-related gene) (ABL2), transcript variant b, mRNA.
ILMN_1696682	ABLIM1	0.589608	0.847892	0.0777901	NA	68.3346	3.75881	63.3086	NA	1.07939	NA	0.110216	2	2	2	2	2	2	0.477724	0.665853	Homo sapiens actin binding LIM protein 1 (ABLIM1), transcript variant 1, mRNA.
ILMN_1785424	ABLIM1	0	0	0.00787209	NA	1251.56	6.96671	1154.21	NA	1.08435	NA	0.116832	2	2	2	2	2	2	0.432928	0.646726	Homo sapiens actin binding LIM protein 1 (ABLIM1), transcript variant 4, mRNA.
ILMN_2396672	ABLIM1	0	0	0.0656706	NA	576.557	26.7731	520.918	NA	1.10681	NA	0.146407	2	2	2	2	2	2	0.340627	0.59991	Homo sapiens actin binding LIM protein 1 (ABLIM1), transcript variant 2, mRNA.
ILMN_1731610	ABLIM1	0.0210843	0.0286145	0.205582	NA	108.558	15.7808	96.748	NA	1.12206	NA	0.166156	2	2	2	2	2	2	0.381658	0.622624	Homo sapiens actin binding LIM protein 1 (ABLIM1), transcript variant 4, mRNA.
ILMN_1758825	ABLIM2	0.115211	0.0376506	0.0194721	NA	81.2567	1.11881	92.7847	NA	0.875756	NA	-0.1914	2	2	2	2	2	2	0.205146	0.494341	Homo sapiens actin binding LIM protein family, member 2 (ABLIM2), mRNA.
ILMN_1656940	ABLIM3	0.201054	0.527108	0.10125	NA	79.2101	5.67101	70.0295	NA	1.1311	NA	0.177722	2	2	2	2	2	2	0.264928	0.546166	Homo sapiens actin binding LIM protein family, member 3 (ABLIM3), mRNA.
ILMN_1656979	ABO	0.52259	0.346386	0.00134371	NA	69.557	0.0660892	73.8115	NA	0.94236	NA	-0.0856503	2	2	2	2	2	2	0.563706	0.698536	Homo sapiens ABO blood group (transferase A, alpha 1-3-N-acetylgalactosaminyltransferase; transferase B, alpha 1-3-galactosyltransferase) (ABO), mRNA.
ILMN_1731433	ABP1	0.265813	0.0993976	0.120053	NA	77.3907	6.56974	83.2821	NA	0.929259	NA	-0.105847	2	2	2	2	2	2	0.478865	0.666159	Homo sapiens amiloride binding protein 1 (amine oxidase (copper-containing)) (ABP1), mRNA.
ILMN_1672878	ABR	0	0	0.322361	NA	560.249	127.705	662.004	NA	0.846292	NA	-0.240773	2	2	2	2	2	2	0.17374	0.462198	Homo sapiens active BCR-related gene (ABR), transcript variant 2, mRNA.
ILMN_1655114	ABR	0.434488	0.0828313	0.163124	NA	73.7657	8.50858	84.5166	NA	0.872795	NA	-0.196285	2	2	2	2	2	2	0.214234	0.501904	Homo sapiens active BCR-related gene (ABR), transcript variant 2, mRNA.
ILMN_1657045	ABR	0.28991	0.129518	0.0821111	NA	75.2395	4.3685	81.2363	NA	0.926181	NA	-0.110634	2	2	2	2	2	2	0.458855	0.657717	Homo sapiens active BCR-related gene (ABR), transcript variant 1, mRNA.
ILMN_1766991	ABRA	0.703313	0.490964	0.0864013	NA	65.8847	4.02522	70.5587	NA	0.933757	NA	-0.0988817	2	2	2	2	2	2	0.506279	0.677996	Homo sapiens actin-binding Rho activating protein (ABRA), mRNA.
ILMN_1658083	ABT1	0.00376506	0.0060241	0.000691783	NA	116.884	0.0571754	133.311	NA	0.876772	NA	-0.189727	2	2	2	2	2	2	0.208636	0.497579	Homo sapiens activator of basal transcription 1 (ABT1), mRNA.
ILMN_1802096	ABTB1	0.0301205	0.0060241	0.174434	NA	101.919	12.571	131.563	NA	0.774676	NA	-0.368336	2	2	2	2	2	2	0.0305029	0.185441	Homo sapiens ankyrin repeat and BTB (POZ) domain containing 1 (ABTB1), transcript variant 1, mRNA.
ILMN_2367165	ABTB1	0.0143072	0.0993976	0.0714651	NA	102.866	5.1982	83.5488	NA	1.23121	NA	0.300081	2	2	2	2	2	2	0.0592957	0.270192	Homo sapiens ankyrin repeat and BTB (POZ) domain containing 1 (ABTB1), transcript variant 3, mRNA.
ILMN_1753370	ABTB2	0.00753012	0.0240964	0.0168159	NA	113.074	1.34452	97.9121	NA	1.15486	NA	0.207712	2	2	2	2	2	2	0.171056	0.458514	Homo sapiens ankyrin repeat and BTB (POZ) domain containing 2 (ABTB2), mRNA.
ILMN_1738921	ACAA1	0	0	0.0356177	NA	481.046	12.1154	585.214	NA	0.821999	NA	-0.282792	2	2	2	2	2	2	0.0682367	0.290603	Homo sapiens acetyl-Coenzyme A acyltransferase 1 (peroxisomal 3-oxoacyl-Coenzyme A thiolase) (ACAA1), nuclear gene encoding mitochondrial protein, mRNA.
ILMN_1660199	ACAA2	0	0	0.00616147	NA	225.113	0.980778	341.51	NA	0.659171	NA	-0.601276	2	2	2	2	2	2	0.000581454	0.0142498	Homo sapiens acetyl-Coenzyme A acyltransferase 2 (mitochondrial 3-oxoacyl-Coenzyme A thiolase) (ACAA2), nuclear gene encoding mitochondrial protein, mRNA.
ILMN_1772123	ACACA	0	0	0.0905143	NA	666.724	42.6725	844.34	NA	0.789639	NA	-0.340735	2	2	2	2	2	2	0.0339547	0.198332	Homo sapiens acetyl-Coenzyme A carboxylase alpha (ACACA), transcript variant 2, mRNA.
ILMN_1667641	ACACA	0.669428	0.593373	0.0557006	NA	66.9138	2.63548	68.7461	NA	0.973347	NA	-0.0389744	2	2	2	2	2	2	0.788694	0.759661	Homo sapiens acetyl-Coenzyme A carboxylase alpha (ACACA), transcript variant 2, mRNA.
ILMN_2331636	ACACA	0	0	0.119372	NA	1094.83	92.4131	1078.03	NA	1.01558	NA	0.0223089	2	2	2	2	2	2	0.912295	0.785378	Homo sapiens acetyl-Coenzyme A carboxylase alpha (ACACA), transcript variant 3, mRNA.
ILMN_1763852	ACACB	0	0.00301205	0.0506371	NA	174.849	6.26063	153.365	NA	1.14008	NA	0.189141	2	2	2	2	2	2	0.216478	0.503728	Homo sapiens acetyl-Coenzyme A carboxylase beta (ACACB), mRNA.
ILMN_1687303	ACAD10	0.0060241	0.00301205	0.0367256	NA	110.611	2.87246	151.657	NA	0.729354	NA	-0.455308	2	2	2	2	2	2	0.00577787	0.0657132	Homo sapiens acyl-Coenzyme A dehydrogenase family, member 10 (ACAD10), mRNA.
ILMN_1761058	ACAD11	0	0	0.0908067	NA	266.575	17.1168	239.942	NA	1.111	NA	0.151856	2	2	2	2	2	2	0.33461	0.596158	Homo sapiens acyl-Coenzyme A dehydrogenase family, member 11 (ACAD11), mRNA.
ILMN_2225595	ACAD8	0	0	0.0141546	NA	667.287	6.67875	1200.8	NA	0.555702	NA	-0.847616	2	2	2	2	2	2	1.37039e-05	0.000947218	Homo sapiens acyl-Coenzyme A dehydrogenase family, member 8 (ACAD8), nuclear gene encoding mitochondrial protein, mRNA.
ILMN_1775579	ACAD9	0	0	0.018274	NA	526.003	6.79685	644.918	NA	0.815613	NA	-0.294044	2	2	2	2	2	2	0.0582696	0.267921	Homo sapiens acyl-Coenzyme A dehydrogenase family, member 9 (ACAD9), mRNA.
ILMN_1660890	ACADL	0.386295	0.621988	0.031829	NA	72.0482	1.62156	68.2584	NA	1.05552	NA	0.0779554	2	2	2	2	2	2	0.602089	0.711169	Homo sapiens acyl-Coenzyme A dehydrogenase, long chain (ACADL), nuclear gene encoding mitochondrial protein, mRNA.
ILMN_2053679	ACADM	0	0	0.222859	NA	1536.84	242.182	1164.26	NA	1.32001	NA	0.400548	2	2	2	2	2	2	0.0385942	0.213533	Homo sapiens acyl-Coenzyme A dehydrogenase, C-4 to C-12 straight chain (ACADM), nuclear gene encoding mitochondrial protein, mRNA.
ILMN_1795104	ACADS	0.00451807	0.00150602	0.08378	NA	116.211	6.88449	157.658	NA	0.737109	NA	-0.440051	2	2	2	2	2	2	0.00812984	0.0832936	Homo sapiens acyl-Coenzyme A dehydrogenase, C-2 to C-3 short chain (ACADS), nuclear gene encoding mitochondrial protein, mRNA.
ILMN_1740920	ACADSB	0.164157	0.0707831	0.0730288	NA	79.6526	4.1132	86.0893	NA	0.925233	NA	-0.112112	2	2	2	2	2	2	0.452739	0.654396	Homo sapiens acyl-Coenzyme A dehydrogenase, short/branched chain (ACADSB), nuclear gene encoding mitochondrial protein, mRNA.
ILMN_1806408	ACADVL	0	0	0.018035	NA	2124.86	27.0975	2443.85	NA	0.86947	NA	-0.201791	2	2	2	2	2	2	0.182602	0.471647	Homo sapiens acyl-Coenzyme A dehydrogenase, very long chain (ACADVL), nuclear gene encoding mitochondrial protein, transcript variant 2, mRNA.
ILMN_2352009	ACADVL	0	0	0.0364263	NA	764.992	19.7041	853.245	NA	0.896568	NA	-0.157515	2	2	2	2	2	2	0.294384	0.569736	Homo sapiens acyl-Coenzyme A dehydrogenase, very long chain (ACADVL), nuclear gene encoding mitochondrial protein, transcript variant 1, mRNA.
ILMN_2263466	ACADVL	0	0	0.238631	NA	210.102	35.4521	204.482	NA	1.02749	NA	0.0391179	2	2	2	2	2	2	0.918175	0.785678	Homo sapiens acyl-Coenzyme A dehydrogenase, very long chain (ACADVL), nuclear gene encoding mitochondrial protein, transcript variant 1, mRNA.
ILMN_1693148	ACAN	0.584337	0.947289	0.0621746	NA	68.34	3.0045	59.4578	NA	1.14939	NA	0.200863	2	2	2	2	2	2	0.193446	0.483071	Homo sapiens aggrecan (ACAN), transcript variant 2, mRNA.
ILMN_1808395	ACAP1	0.611446	0.319277	0.050455	NA	67.9543	2.42441	74.7027	NA	0.909663	NA	-0.136595	2	2	2	2	2	2	0.361923	0.611783	Homo sapiens ArfGAP with coiled-coil, ankyrin repeat and PH domains 1 (ACAP1), mRNA.
ILMN_1743847	ACAP3	0.199548	0.0993976	0.0216852	NA	77.2333	1.18428	83.2776	NA	0.92742	NA	-0.108705	2	2	2	2	2	2	0.465042	0.660506	Homo sapiens ArfGAP with coiled-coil, ankyrin repeat and PH domains 3 (ACAP3), mRNA.
ILMN_1800008	ACAT1	0	0	0.0974417	NA	1254.09	86.4089	1274.75	NA	0.983793	NA	-0.0235736	2	2	2	2	2	2	0.860001	0.775579	Homo sapiens acetyl-Coenzyme A acetyltransferase 1 (ACAT1), nuclear gene encoding mitochondrial protein, mRNA.
ILMN_2133799	ACAT2	0.277861	0.528614	0.0189532	NA	74.4218	0.997398	69.8747	NA	1.06507	NA	0.0909549	2	2	2	2	2	2	0.54117	0.691117	Homo sapiens acetyl-Coenzyme A acetyltransferase 2 (acetoacetyl Coenzyme A thiolase) (ACAT2), mRNA.
ILMN_1665945	ACBD3	0	0	0.0655239	NA	480.409	22.2585	532.8	NA	0.901668	NA	-0.149332	2	2	2	2	2	2	0.321364	0.5882	Homo sapiens acyl-Coenzyme A binding domain containing 3 (ACBD3), mRNA.
ILMN_1676288	ACBD4	0.0933735	0.25753	0.0280295	NA	83.3267	1.65152	76.311	NA	1.09194	NA	0.126888	2	2	2	2	2	2	0.397332	0.63084	Homo sapiens acyl-Coenzyme A binding domain containing 4 (ACBD4), mRNA.
ILMN_2410362	ACBD5	0.541416	0.141566	0.126044	NA	69.4391	6.18888	80.6538	NA	0.860952	NA	-0.215995	2	2	2	2	2	2	0.167638	0.454337	Homo sapiens acyl-Coenzyme A binding domain containing 5 (ACBD5), transcript variant 1, mRNA.
ILMN_2295980	ACBD5	0.863705	0.793675	0.00621432	NA	62.9814	0.276752	64.3281	NA	0.979066	NA	-0.0305216	2	2	2	2	2	2	0.836312	0.771173	Homo sapiens acyl-Coenzyme A binding domain containing 5 (ACBD5), transcript variant 1, mRNA.
ILMN_1693250	ACBD5	0.060241	0.111446	0.146652	NA	91.7222	9.51148	82.5155	NA	1.11158	NA	0.152607	2	2	2	2	2	2	0.369594	0.616361	Homo sapiens acyl-Coenzyme A binding domain containing 5 (ACBD5), transcript variant 1, mRNA.
ILMN_1684271	ACBD6	0	0	0.0364072	NA	448.74	11.5523	492.244	NA	0.911621	NA	-0.133494	2	2	2	2	2	2	0.37196	0.617052	Homo sapiens acyl-Coenzyme A binding domain containing 6 (ACBD6), mRNA.
ILMN_1726388	ACBD7	0	0	0.096043	NA	261.593	17.7655	338.786	NA	0.772149	NA	-0.373049	2	2	2	2	2	2	0.0220573	0.15214	PREDICTED: Homo sapiens acyl-Coenzyme A binding domain containing 7 (ACBD7), mRNA.
ILMN_2106002	ACBD7	0.475904	0.876506	0.0217133	NA	70.2436	1.07849	62.334	NA	1.12689	NA	0.172348	2	2	2	2	2	2	0.252946	0.537244	Homo sapiens acyl-Coenzyme A binding domain containing 7 (ACBD7), mRNA.
ILMN_1779685	ACCN1	0.00828313	0	0.064527	NA	109.178	4.9815	170.513	NA	0.640288	NA	-0.643207	2	2	2	2	2	2	0.000345808	0.00978139	Homo sapiens amiloride-sensitive cation channel 1, neuronal (ACCN1), transcript variant 2, mRNA.
ILMN_1769694	ACCN2	0.392319	0.143072	0.0244497	NA	71.8376	1.24197	80.3955	NA	0.893552	NA	-0.162376	2	2	2	2	2	2	0.279659	0.558187	Homo sapiens amiloride-sensitive cation channel 2, neuronal (ACCN2), transcript variant 2, mRNA.
ILMN_1727251	ACCN2	0.315512	0.320783	0.0248027	NA	73.5299	1.28958	74.6835	NA	0.984553	NA	-0.0224592	2	2	2	2	2	2	0.878269	0.780295	Homo sapiens amiloride-sensitive cation channel 2, neuronal (ACCN2), transcript variant 1, mRNA.
ILMN_2368728	ACCN3	0.269578	0.191265	0.108672	NA	76.6828	5.89254	78.1571	NA	0.981137	NA	-0.0274738	2	2	2	2	2	2	0.837129	0.771178	Homo sapiens amiloride-sensitive cation channel 3 (ACCN3), transcript variant 2, mRNA.
ILMN_1734479	ACCN3	0.0112952	0.0677711	0.0305105	NA	103.485	2.23261	86.6299	NA	1.19457	NA	0.25649	2	2	2	2	2	2	0.0961199	0.349353	Homo sapiens amiloride-sensitive cation channel 3 (ACCN3), transcript variant 3, mRNA.
ILMN_2394902	ACCN4	0.0331325	0.00451807	0.0288847	NA	93.0344	1.90019	134.798	NA	0.690178	NA	-0.534961	2	2	2	2	2	2	0.00167384	0.0290778	Homo sapiens amiloride-sensitive cation channel 4, pituitary (ACCN4), transcript variant 1, mRNA.
ILMN_2287535	ACCN4	0.658886	0.406627	0.0776982	NA	66.8012	3.67012	72.2775	NA	0.924232	NA	-0.113673	2	2	2	2	2	2	0.446863	0.652312	Homo sapiens amiloride-sensitive cation channel 4, pituitary (ACCN4), transcript variant 1, mRNA.
ILMN_2394897	ACCN4	0.383283	0.456325	0.0531959	NA	72.4439	2.72499	71.3315	NA	1.0156	NA	0.0223259	2	2	2	2	2	2	0.886562	0.781214	Homo sapiens amiloride-sensitive cation channel 4, pituitary (ACCN4), transcript variant 1, mRNA.
ILMN_1750295	ACCN5	0.509036	0.346386	0.155512	NA	70.7908	7.78439	73.7684	NA	0.959636	NA	-0.0594403	2	2	2	2	2	2	0.672678	0.733019	Homo sapiens amiloride-sensitive cation channel 5, intestinal (ACCN5), mRNA.
ILMN_1780630	ACCSL	0.323795	0.644578	0.0301592	NA	73.3292	1.5638	67.839	NA	1.08093	NA	0.112272	2	2	2	2	2	2	0.453496	0.654405	Homo sapiens 1-aminocyclopropane-1-carboxylate synthase homolog (Arabidopsis)(non-functional)-like (ACCSL), mRNA.
ILMN_1716480	ACD	0	0	0.0517351	NA	522.651	19.1198	458.922	NA	1.13887	NA	0.1876	2	2	2	2	2	2	0.220398	0.507384	Homo sapiens adrenocortical dysplasia homolog (mouse) (ACD), transcript variant 2, mRNA.
ILMN_1779984	ACE	0.286145	0.387048	0.134962	NA	77.4518	7.39141	72.8518	NA	1.06314	NA	0.0883347	2	2	2	2	2	2	0.605914	0.713033	Homo sapiens angiotensin I converting enzyme (peptidyl-dipeptidase A) 1 (ACE), transcript variant 1, mRNA.
ILMN_1715192	ACE	0.396837	0.808735	0.027106	NA	71.8401	1.37695	64.0415	NA	1.12177	NA	0.165783	2	2	2	2	2	2	0.271612	0.552119	Homo sapiens angiotensin I converting enzyme (peptidyl-dipeptidase A) 1 (ACE), transcript variant 3, mRNA.
ILMN_2339410	ACE	0.479669	0.915663	0.137039	NA	71.5233	6.9307	61.1791	NA	1.16908	NA	0.225374	2	2	2	2	2	2	0.177628	0.46641	Homo sapiens angiotensin I converting enzyme (peptidyl-dipeptidase A) 1 (ACE), transcript variant 2, mRNA.
ILMN_1667018	ACE2	0.278614	0.0542169	0.0740703	NA	75.4731	3.95295	88.6318	NA	0.851535	NA	-0.231862	2	2	2	2	2	2	0.132716	0.408154	Homo sapiens angiotensin I converting enzyme (peptidyl-dipeptidase A) 2 (ACE2), mRNA.
ILMN_1773243	ACER1	0.368223	0.680723	0.0351569	NA	72.4597	1.80133	67.0345	NA	1.08093	NA	0.112276	2	2	2	2	2	2	0.454509	0.654633	Homo sapiens alkaline ceramidase 1 (ACER1), mRNA.
ILMN_1761000	ACER2	0.179217	0.135542	0.0713917	NA	78.619	3.96881	80.8959	NA	0.971854	NA	-0.0411882	2	2	2	2	2	2	0.775318	0.756391	Homo sapiens alkaline ceramidase 2 (ACER2), mRNA.
ILMN_2333219	ACHE	0.127259	0.00301205	0.0103383	NA	80.3406	0.587314	149.679	NA	0.536753	NA	-0.89767	2	2	2	2	2	2	6.59875e-06	0.000583491	Homo sapiens acetylcholinesterase (Yt blood group) (ACHE), transcript variant E4-E6, mRNA.
ILMN_1780485	ACHE	0.334337	0.539157	0.00676181	NA	73.0138	0.349103	69.7234	NA	1.04719	NA	0.0665253	2	2	2	2	2	2	0.653403	0.727627	Homo sapiens acetylcholinesterase (YT blood group) (ACHE), transcript variant E4-E5, mRNA.
ILMN_1699636	ACIN1	0	0	0.12818	NA	1177.32	106.709	907.042	NA	1.29798	NA	0.376267	2	2	2	2	2	2	0.0273229	0.173634	Homo sapiens apoptotic chromatin condensation inducer 1 (ACIN1), mRNA.
ILMN_2371379	ACLY	0	0	0.108716	NA	1851.88	142.361	2150.33	NA	0.861206	NA	-0.215569	2	2	2	2	2	2	0.165306	0.451887	Homo sapiens ATP citrate lyase (ACLY), transcript variant 2, mRNA.
ILMN_1727091	ACMSD	0.0278614	0.0060241	0.090426	NA	96.9491	6.19901	120.896	NA	0.801923	NA	-0.318464	2	2	2	2	2	2	0.0457771	0.234837	Homo sapiens aminocarboxymuconate semialdehyde decarboxylase (ACMSD), mRNA.
ILMN_2134039	ACN9	0	0	0.168512	NA	322.629	38.4431	387.194	NA	0.833249	NA	-0.26318	2	2	2	2	2	2	0.106126	0.366364	Homo sapiens ACN9 homolog (S. cerevisiae) (ACN9), mRNA.
ILMN_1750800	ACO1	0	0	0.0659195	NA	1561.88	72.8027	1613.65	NA	0.967922	NA	-0.0470376	2	2	2	2	2	2	0.746516	0.750333	Homo sapiens aconitase 1, soluble (ACO1), mRNA.
ILMN_1654861	ACO2	0	0	0.12479	NA	282.697	24.9451	478.34	NA	0.590996	NA	-0.75878	2	2	2	2	2	2	8.98005e-05	0.0038658	Homo sapiens aconitase 2, mitochondrial (ACO2), nuclear gene encoding mitochondrial protein, mRNA.
ILMN_2121389	ACOT1	0.4375	0.0436747	0.159525	NA	73.3456	8.27349	90.4225	NA	0.811144	NA	-0.301971	2	2	2	2	2	2	0.066223	0.285888	Homo sapiens acyl-CoA thioesterase 1 (ACOT1), mRNA.
ILMN_1715543	ACOT1	0.00376506	0.00903614	0.0514289	NA	121.887	4.43252	111.847	NA	1.08977	NA	0.124021	2	2	2	2	2	2	0.413687	0.638516	Homo sapiens acyl-CoA thioesterase 1 (ACOT1), mRNA.
ILMN_2353978	ACOT11	0.385542	0.281627	0.0722584	NA	72.8676	3.72313	75.8564	NA	0.960599	NA	-0.0579931	2	2	2	2	2	2	0.691659	0.737824	Homo sapiens acyl-CoA thioesterase 11 (ACOT11), transcript variant 1, mRNA.
ILMN_1739594	ACOT11	0.0316265	0.0316265	0.0319344	NA	92.6656	2.09248	94.5638	NA	0.979927	NA	-0.0292542	2	2	2	2	2	2	0.841732	0.772297	Homo sapiens acyl-CoA thioesterase 11 (ACOT11), transcript variant 2, mRNA.
ILMN_1785474	ACOT12	0.128765	0.063253	0.0183354	NA	80.5769	1.04468	87.7756	NA	0.917988	NA	-0.123453	2	2	2	2	2	2	0.407713	0.635897	Homo sapiens acyl-CoA thioesterase 12 (ACOT12), mRNA.
ILMN_2188959	ACOT2	0.703313	0.623494	0.0431628	NA	66.4936	2.02943	68.2551	NA	0.974192	NA	-0.0377213	2	2	2	2	2	2	0.796503	0.761434	Homo sapiens acyl-CoA thioesterase 2 (ACOT2), mRNA.
ILMN_1764321	ACOT4	0.0466867	0.0256024	0.210286	NA	98.4332	14.6365	97.2065	NA	1.01262	NA	0.0180928	2	2	2	2	2	2	0.990861	0.799885	Homo sapiens acyl-CoA thioesterase 4 (ACOT4), mRNA.
ILMN_2156699	ACOT6	0.685994	0.911145	0.0553037	NA	66.6162	2.60507	61.4135	NA	1.08472	NA	0.117317	2	2	2	2	2	2	0.440441	0.64895	Homo sapiens acyl-CoA thioesterase 6 (ACOT6), mRNA.
ILMN_1784756	ACOT7	0.482681	0.243976	0.16367	NA	72.0462	8.33805	76.5299	NA	0.941412	NA	-0.0871015	2	2	2	2	2	2	0.553076	0.69456	Homo sapiens acyl-CoA thioesterase 7 (ACOT7), transcript variant hBACHd, mRNA.
ILMN_1719178	ACOT7	0.47741	0.334337	0.106109	NA	71.1115	5.33553	74.356	NA	0.956365	NA	-0.0643675	2	2	2	2	2	2	0.657673	0.728963	Homo sapiens acyl-CoA thioesterase 7 (ACOT7), transcript variant hBACHb, mRNA.
ILMN_1740265	ACOT7	0	0	0.0140013	NA	3199.98	31.6811	3019.75	NA	1.05968	NA	0.0836318	2	2	2	2	2	2	0.573463	0.700816	Homo sapiens acyl-CoA thioesterase 7 (ACOT7), transcript variant hBACHb, mRNA.
ILMN_1788078	ACOT7	0.463102	0.792169	0.0266787	NA	70.5785	1.33144	64.407	NA	1.09582	NA	0.13201	2	2	2	2	2	2	0.378663	0.620885	Homo sapiens acyl-CoA thioesterase 7 (ACOT7), transcript variant hBACHc, mRNA.
ILMN_2252621	ACOT7	0.208584	0.894578	0.0024794	NA	76.7933	0.134634	61.869	NA	1.24122	NA	0.311763	2	2	2	2	2	2	0.0457046	0.234603	Homo sapiens acyl-CoA thioesterase 7 (ACOT7), transcript variant hBACHa, mRNA.
ILMN_2332250	ACOT7	0	0	0.0950969	NA	3514.97	236.359	2600.89	NA	1.35145	NA	0.434508	2	2	2	2	2	2	0.0100632	0.0951514	Homo sapiens acyl-CoA thioesterase 7 (ACOT7), transcript variant hBACHa, mRNA.
ILMN_1679600	ACOT8	0.000753012	0	0.0434306	NA	150.883	4.63364	192.462	NA	0.783964	NA	-0.35114	2	2	2	2	2	2	0.0270641	0.172868	Homo sapiens acyl-CoA thioesterase 8 (ACOT8), transcript variant 1, mRNA.
ILMN_2367070	ACOT9	0.0180723	0.0060241	0.0566089	NA	100.579	4.02603	120.815	NA	0.832502	NA	-0.264474	2	2	2	2	2	2	0.0878015	0.332991	Homo sapiens acyl-CoA thioesterase 9 (ACOT9), transcript variant 1, mRNA.
ILMN_1658995	ACOT9	0	0	0.0879637	NA	377.94	23.5078	319.953	NA	1.18123	NA	0.240295	2	2	2	2	2	2	0.130122	0.404068	Homo sapiens acyl-CoA thioesterase 9 (ACOT9), transcript variant 2, mRNA.
ILMN_1750158	ACOX1	0	0	0.121999	NA	190.9	16.4682	218.214	NA	0.874831	NA	-0.192923	2	2	2	2	2	2	0.213349	0.501293	Homo sapiens acyl-Coenzyme A oxidase 1, palmitoyl (ACOX1), transcript variant 2, mRNA.
ILMN_1668839	ACOX1	0.104669	0.0888554	0.0321351	NA	82.6463	1.87797	84.172	NA	0.981874	NA	-0.0263895	2	2	2	2	2	2	0.856832	0.774619	Homo sapiens acyl-Coenzyme A oxidase 1, palmitoyl (ACOX1), transcript variant 2, mRNA.
ILMN_1765767	ACOX1	0.664157	0.865964	0.00461414	NA	67.1852	0.219204	62.7831	NA	1.07011	NA	0.0977653	2	2	2	2	2	2	0.51053	0.679676	Homo sapiens acyl-Coenzyme A oxidase 1, palmitoyl (ACOX1), transcript variant 1, mRNA.
ILMN_1685703	ACOX2	0.0572289	0.0677711	0.034201	NA	88.0125	2.12847	86.5424	NA	1.01699	NA	0.0242998	2	2	2	2	2	2	0.872176	0.778546	Homo sapiens acyl-Coenzyme A oxidase 2, branched chain (ACOX2), mRNA.
ILMN_1743396	ACOX3	0	0	0.117036	NA	259.919	21.51	277.312	NA	0.93728	NA	-0.0934477	2	2	2	2	2	2	0.528758	0.68591	Homo sapiens acyl-Coenzyme A oxidase 3, pristanoyl (ACOX3), mRNA.
ILMN_1743680	ACOXL	0.790663	0.915663	0.0420883	NA	64.5621	1.92142	61.1623	NA	1.05559	NA	0.0780436	2	2	2	2	2	2	0.604001	0.712071	Homo sapiens acyl-Coenzyme A oxidase-like (ACOXL), mRNA.
ILMN_1669633	ACP1	0	0	0.000575405	NA	2671.12	1.08681	3038.64	NA	0.879053	NA	-0.185977	2	2	2	2	2	2	0.217396	0.504199	Homo sapiens acid phosphatase 1, soluble (ACP1), transcript variant 2, mRNA.
ILMN_2344956	ACP1	0	0	0.0323396	NA	6115.36	139.843	5863.65	NA	1.04293	NA	0.0606402	2	2	2	2	2	2	0.68511	0.736534	Homo sapiens acid phosphatase 1, soluble (ACP1), transcript variant 4, mRNA.
ILMN_2104830	ACP2	0	0	0.00063601	NA	226.733	0.101968	248.952	NA	0.910749	NA	-0.134875	2	2	2	2	2	2	0.366411	0.614501	Homo sapiens acid phosphatase 2, lysosomal (ACP2), mRNA.
ILMN_2078599	ACP5	0.34262	0.311747	0.0471963	NA	73.1675	2.4418	75.0071	NA	0.975475	NA	-0.0358239	2	2	2	2	2	2	0.805921	0.763483	Homo sapiens acid phosphatase 5, tartrate resistant (ACP5), mRNA.
ILMN_2234343	ACP6	0	0	0.0931025	NA	313.786	20.6576	275.941	NA	1.13715	NA	0.185422	2	2	2	2	2	2	0.24101	0.526612	Homo sapiens acid phosphatase 6, lysophosphatidic (ACP6), mRNA.
ILMN_2306955	ACPL2	0.000753012	0.00301205	0.100467	NA	149.846	10.6452	151.142	NA	0.99142	NA	-0.012432	2	2	2	2	2	2	0.916513	0.785635	Homo sapiens acid phosphatase-like 2 (ACPL2), transcript variant 1, mRNA.
ILMN_1758323	ACPP	0.21988	0.304217	0.121748	NA	78.8957	6.79202	75.2389	NA	1.0486	NA	0.0684679	2	2	2	2	2	2	0.686508	0.7367	Homo sapiens acid phosphatase, prostate (ACPP), mRNA.
ILMN_2351906	ACPT	0.491717	0.528614	0.137266	NA	71.0488	6.89614	69.8856	NA	1.01665	NA	0.0238167	2	2	2	2	2	2	0.914494	0.785512	Homo sapiens acid phosphatase, testicular (ACPT), mRNA.
ILMN_1728331	ACPT	0	0	0.0961289	NA	204.83	13.923	186.821	NA	1.09639	NA	0.132764	2	2	2	2	2	2	0.401835	0.6334	Homo sapiens acid phosphatase, testicular (ACPT), mRNA.
ILMN_1705637	ACR	0.063253	0.343373	0.0252812	NA	87.1015	1.55707	74.0932	NA	1.17557	NA	0.233357	2	2	2	2	2	2	0.127165	0.400366	Homo sapiens acrosin (ACR), mRNA.
ILMN_1784203	ACRBP	0.333584	0.582831	0.0552444	NA	73.4841	2.87056	68.9537	NA	1.0657	NA	0.0918046	2	2	2	2	2	2	0.545837	0.692772	Homo sapiens acrosin binding protein (ACRBP), mRNA.
ILMN_1666690	ACRC	0.00301205	0.0060241	0.0477316	NA	121.956	4.11619	130.596	NA	0.933846	NA	-0.098743	2	2	2	2	2	2	0.506501	0.678036	Homo sapiens acidic repeat containing (ACRC), mRNA.
ILMN_1654468	ACRV1	0.00753012	0.0150602	0.0501732	NA	111.461	3.9544	105.735	NA	1.05415	NA	0.076084	2	2	2	2	2	2	0.615389	0.715836	Homo sapiens acrosomal vesicle protein 1 (ACRV1), transcript variant 11, mRNA.
ILMN_2320277	ACRV1	0.0414157	0.126506	0.090905	NA	92.5962	5.95204	81.4963	NA	1.1362	NA	0.184218	2	2	2	2	2	2	0.242977	0.528124	Homo sapiens acrosomal vesicle protein 1 (ACRV1), transcript variant 5, mRNA.
ILMN_2227011	ACSBG1	0.000753012	0.0406627	0.0865414	NA	172.063	10.5292	92.0249	NA	1.86974	NA	0.902841	2	2	2	2	2	2	9.11759e-06	0.000721695	Homo sapiens acyl-CoA synthetase bubblegum family member 1 (ACSBG1), mRNA.
ILMN_1730002	ACSBG2	0.586596	0.700301	0.00162416	NA	68.5396	0.0787148	66.7738	NA	1.02645	NA	0.0376565	2	2	2	2	2	2	0.798918	0.762202	Homo sapiens acyl-CoA synthetase bubblegum family member 2 (ACSBG2), mRNA.
ILMN_1716832	ACSF3	0.0564759	0.0677711	0.000492059	NA	88.1996	0.030688	87.011	NA	1.01366	NA	0.0195738	2	2	2	2	2	2	0.894584	0.782394	Homo sapiens acyl-CoA synthetase family member 3 (ACSF3), mRNA.
ILMN_1684585	ACSL1	0.234187	0.381024	0.165868	NA	80.5528	9.44776	73.0174	NA	1.1032	NA	0.141695	2	2	2	2	2	2	0.422718	0.64208	Homo sapiens acyl-CoA synthetase long-chain family member 1 (ACSL1), mRNA.
ILMN_1654414	ACSL3	0.00677711	0.0150602	0.11298	NA	115.206	9.20368	104.71	NA	1.10024	NA	0.137818	2	2	2	2	2	2	0.394409	0.629741	Homo sapiens acyl-CoA synthetase long-chain family member 3 (ACSL3), transcript variant 1, mRNA.
ILMN_1666096	ACSL3	0	0	0.0720888	NA	303.437	15.4675	270.972	NA	1.11981	NA	0.163249	2	2	2	2	2	2	0.291364	0.568373	Homo sapiens acyl-CoA synthetase long-chain family member 3 (ACSL3), transcript variant 1, mRNA.
ILMN_2360705	ACSL3	0	0	0.0836225	NA	2049.93	121.213	1376.49	NA	1.48925	NA	0.574585	2	2	2	2	2	2	0.00115897	0.022595	Homo sapiens acyl-CoA synthetase long-chain family member 3 (ACSL3), transcript variant 2, mRNA.
ILMN_2285506	ACSL4	0.00301205	0.00150602	0.0193645	NA	127.405	1.74453	159.089	NA	0.800843	NA	-0.320409	2	2	2	2	2	2	0.0407646	0.220022	Homo sapiens acyl-CoA synthetase long-chain family member 4 (ACSL4), transcript variant 2, mRNA.
ILMN_1683598	ACSL4	0	0	0.301072	NA	606.512	129.12	694.863	NA	0.87285	NA	-0.196194	2	2	2	2	2	2	0.245336	0.530486	Homo sapiens acyl-CoA synthetase long-chain family member 4 (ACSL4), transcript variant 1, mRNA.
ILMN_2391458	ACSL4	0.0504518	0.0150602	0.148954	NA	92.91	9.78589	103.541	NA	0.897327	NA	-0.156294	2	2	2	2	2	2	0.311119	0.580719	Homo sapiens acyl-CoA synthetase long-chain family member 4 (ACSL4), transcript variant 2, mRNA.
ILMN_1691714	ACSL4	0.707831	0.793675	0.0091169	NA	66.3261	0.427579	64.3196	NA	1.0312	NA	0.0443198	2	2	2	2	2	2	0.764607	0.753636	Homo sapiens acyl-CoA synthetase long-chain family member 4 (ACSL4), transcript variant 2, mRNA.
ILMN_1807914	ACSL5	0.565512	0.777108	0.0447163	NA	68.7737	2.17457	64.6774	NA	1.06333	NA	0.0885959	2	2	2	2	2	2	0.556743	0.696133	Homo sapiens acyl-CoA synthetase long-chain family member 5 (ACSL5), transcript variant 3, mRNA.
ILMN_2370882	ACSL5	0.329819	0.635542	0.0771193	NA	74.0897	4.04023	67.9575	NA	1.09024	NA	0.124641	2	2	2	2	2	2	0.421526	0.641546	Homo sapiens acyl-CoA synthetase long-chain family member 5 (ACSL5), transcript variant 2, mRNA.
ILMN_1678517	ACSL5	0.774096	0.981928	0.15133	NA	62.3136	6.66795	56.0055	NA	1.11263	NA	0.153978	2	2	2	2	2	2	0.369007	0.616013	Homo sapiens acyl-CoA synthetase long-chain family member 5 (ACSL5), transcript variant 1, mRNA.
ILMN_1705247	ACSL5	0.212349	0.637048	0.0266753	NA	76.7795	1.44824	67.9042	NA	1.1307	NA	0.17722	2	2	2	2	2	2	0.240873	0.526504	Homo sapiens acyl-CoA synthetase long-chain family member 5 (ACSL5), transcript variant 1, mRNA.
ILMN_2273911	ACSL5	0.195783	0.728916	0.0249494	NA	77.2034	1.36201	66.2126	NA	1.16599	NA	0.221558	2	2	2	2	2	2	0.146323	0.427972	Homo sapiens acyl-CoA synthetase long-chain family member 5 (ACSL5), transcript variant 2, mRNA.
ILMN_2378555	ACSL6	0.915663	0.777108	0.0568	NA	60.5854	2.43333	64.6706	NA	0.93683	NA	-0.0941407	2	2	2	2	2	2	0.526134	0.684655	Homo sapiens acyl-CoA synthetase long-chain family member 6 (ACSL6), transcript variant 1, mRNA.
ILMN_2278242	ACSL6	0.845633	0.725904	0.0311689	NA	63.492	1.39934	66.2999	NA	0.957649	NA	-0.0624314	2	2	2	2	2	2	0.672666	0.733019	Homo sapiens acyl-CoA synthetase long-chain family member 6 (ACSL6), transcript variant 1, mRNA.
ILMN_1730025	ACSL6	0.901355	0.84488	0.0309186	NA	61.4467	1.34339	63.3825	NA	0.969457	NA	-0.0447505	2	2	2	2	2	2	0.761248	0.753566	Homo sapiens acyl-CoA synthetase long-chain family member 6 (ACSL6), transcript variant 2, mRNA.
ILMN_1661434	ACSM1	0.851657	0.870482	0.0361963	NA	62.8835	1.60948	62.5344	NA	1.00558	NA	0.00802954	2	2	2	2	2	2	0.959398	0.795035	Homo sapiens acyl-CoA synthetase medium-chain family member 1 (ACSM1), mRNA.
ILMN_1765912	ACSM2B	0.819277	0.700301	0.0058819	NA	64.092	0.266567	66.7861	NA	0.959661	NA	-0.0594034	2	2	2	2	2	2	0.688134	0.736905	Homo sapiens acyl-CoA synthetase medium-chain family member 2B (ACSM2B), nuclear gene encoding mitochondrial protein, mRNA.
ILMN_1746128	ACSM2B	0.475151	0.546687	0.0686041	NA	70.7945	3.43427	69.5889	NA	1.01733	NA	0.0247811	2	2	2	2	2	2	0.878041	0.780175	Homo sapiens acyl-CoA synthetase medium-chain family member 2B (ACSM2B), nuclear gene encoding mitochondrial protein, mRNA.
ILMN_1662738	ACSM3	0.762048	0.701807	0.0865715	NA	64.4625	3.94609	66.7352	NA	0.965944	NA	-0.0499886	2	2	2	2	2	2	0.729139	0.7461	Homo sapiens acyl-CoA synthetase medium-chain family member 3 (ACSM3), transcript variant 2, mRNA.
ILMN_1771084	ACSM3	0.181476	0.364458	0.0274132	NA	77.9179	1.51036	73.3462	NA	1.06233	NA	0.087233	2	2	2	2	2	2	0.558941	0.69701	Homo sapiens acyl-CoA synthetase medium-chain family member 3 (ACSM3), transcript variant 1, mRNA.
ILMN_1685952	ACSM3	0.230422	0.531627	0.00744895	NA	75.7352	0.398913	69.8416	NA	1.08438	NA	0.116876	2	2	2	2	2	2	0.432739	0.646726	Homo sapiens acyl-CoA synthetase medium-chain family member 3 (ACSM3), transcript variant 1, mRNA.
ILMN_2070792	ACSM5	0.0353916	0.0572289	0.0432872	NA	93.3363	2.8569	88.3169	NA	1.05683	NA	0.0797494	2	2	2	2	2	2	0.596426	0.709156	Homo sapiens acyl-CoA synthetase medium-chain family member 5 (ACSM5), mRNA.
ILMN_1752269	ACSS1	0.127259	0.152108	0.086921	NA	82.3618	5.06215	80.0518	NA	1.02886	NA	0.041041	2	2	2	2	2	2	0.801136	0.762778	Homo sapiens acyl-CoA synthetase short-chain family member 1 (ACSS1), nuclear gene encoding mitochondrial protein, mRNA.
ILMN_1697510	ACSS2	0.0527108	0.0105422	0.131463	NA	92.7898	8.62556	108.683	NA	0.853769	NA	-0.228083	2	2	2	2	2	2	0.147801	0.429388	Homo sapiens acyl-CoA synthetase short-chain family member 2 (ACSS2), transcript variant 1, mRNA.
ILMN_2254962	ACSS2	0.505271	0.337349	0.0298592	NA	69.7161	1.47196	74.3109	NA	0.938169	NA	-0.0920806	2	2	2	2	2	2	0.535075	0.688539	Homo sapiens acyl-CoA synthetase short-chain family member 2 (ACSS2), transcript variant 2, mRNA.
ILMN_1714197	ACSS2	0	0	0.0350067	NA	1528.91	37.8457	1554.72	NA	0.9834	NA	-0.024149	2	2	2	2	2	2	0.868422	0.777807	Homo sapiens acyl-CoA synthetase short-chain family member 2 (ACSS2), transcript variant 1, mRNA.
ILMN_2336595	ACSS2	0	0	0.00849503	NA	1231.33	7.39646	1205.15	NA	1.02172	NA	0.0310052	2	2	2	2	2	2	0.833992	0.771002	Homo sapiens acyl-CoA synthetase short-chain family member 2 (ACSS2), transcript variant 2, mRNA.
ILMN_1659885	ACSS3	0.389307	0.343373	0.086594	NA	72.8771	4.46236	74.0986	NA	0.983515	NA	-0.0239815	2	2	2	2	2	2	0.860611	0.77576	Homo sapiens acyl-CoA synthetase short-chain family member 3 (ACSS3), mRNA.
ILMN_2125869	ACTA1	0.286898	0.0286145	8.10809e-05	NA	74.1579	0.00425168	95.9412	NA	0.772952	NA	-0.37155	2	2	2	2	2	2	0.0196386	0.142835	Homo sapiens actin, alpha 1, skeletal muscle (ACTA1), mRNA.
ILMN_1671703	ACTA2	0.410392	0.281627	0.0412713	NA	71.7317	2.09336	75.8823	NA	0.945302	NA	-0.0811531	2	2	2	2	2	2	0.583826	0.705646	Homo sapiens actin, alpha 2, smooth muscle, aorta (ACTA2), mRNA.
ILMN_2152131	ACTB	0	0	0.0291869	NA	20366.6	420.332	20600.6	NA	0.988643	NA	-0.0164781	2	2	2	2	2	2	0.909822	0.78477	Homo sapiens actin, beta (ACTB), mRNA.
ILMN_2038777	ACTB	0	0	0.178807	NA	21226.5	2683.78	18789.5	NA	1.1297	NA	0.17594	2	2	2	2	2	2	0.326251	0.592067	Homo sapiens actin, beta (ACTB), mRNA.
ILMN_1658660	ACTC1	0.21762	0.718373	0.0314599	NA	76.674	1.70565	66.3511	NA	1.15558	NA	0.208617	2	2	2	2	2	2	0.170899	0.458367	Homo sapiens actin, alpha, cardiac muscle 1 (ACTC1), mRNA.
ILMN_2053178	ACTG1	0	0	0.0347357	NA	32192.2	790.699	31401.5	NA	1.02518	NA	0.0358777	2	2	2	2	2	2	0.811349	0.765048	Homo sapiens actin, gamma 1 (ACTG1), mRNA.
ILMN_1795325	ACTG2	0	0	0.0846744	NA	614.372	36.7848	226.492	NA	2.71255	NA	1.43965	2	2	2	2	2	2	1.07075e-08	5.53134e-06	Homo sapiens actin, gamma 2, smooth muscle, enteric (ACTG2), mRNA.
ILMN_2328280	ACTL6A	0	0	0.0443141	NA	1817.87	56.9626	1683.79	NA	1.07963	NA	0.110537	2	2	2	2	2	2	0.463741	0.659593	Homo sapiens actin-like 6A (ACTL6A), transcript variant 1, mRNA.
ILMN_1749297	ACTL6A	0	0	0.00916154	NA	8985.75	58.2113	7080.65	NA	1.26906	NA	0.343756	2	2	2	2	2	2	0.0293269	0.180752	Homo sapiens actin-like 6A (ACTL6A), transcript variant 2, mRNA.
ILMN_1657855	ACTL6B	0.518072	0.59488	0.0927804	NA	69.8069	4.57972	68.6906	NA	1.01625	NA	0.0232563	2	2	2	2	2	2	0.894974	0.782394	Homo sapiens actin-like 6B (ACTL6B), mRNA.
ILMN_1717900	ACTL7A	0.376506	0.623494	0.052534	NA	72.5818	2.69621	68.1949	NA	1.06433	NA	0.0899436	2	2	2	2	2	2	0.553124	0.69456	Homo sapiens actin-like 7A (ACTL7A), mRNA.
ILMN_1796088	ACTL7B	0.336596	0.411145	0.0067213	NA	72.9223	0.346576	72.1348	NA	1.01092	NA	0.0156652	2	2	2	2	2	2	0.91564	0.785512	Homo sapiens actin-like 7B (ACTL7B), mRNA.
ILMN_1704078	ACTL8	0.061747	0.137048	0.0285	NA	87.2954	1.75922	80.7933	NA	1.08048	NA	0.111671	2	2	2	2	2	2	0.455583	0.655132	Homo sapiens actin-like 8 (ACTL8), mRNA.
ILMN_2232177	ACTN1	0	0	0.00859855	NA	2453.08	14.9149	2707.51	NA	0.906026	NA	-0.142376	2	2	2	2	2	2	0.341011	0.600019	Homo sapiens actinin, alpha 1 (ACTN1), mRNA.
ILMN_1654422	ACTN2	0.0286145	0.222892	0.0390292	NA	95.2318	2.62819	77.3149	NA	1.23174	NA	0.300698	2	2	2	2	2	2	0.0547857	0.259079	Homo sapiens actinin, alpha 2 (ACTN2), mRNA.
ILMN_1665691	ACTN3	0	0	0.147251	NA	188.807	19.6589	271.163	NA	0.696286	NA	-0.522248	2	2	2	2	2	2	0.00328624	0.0452692	Homo sapiens actinin, alpha 3 (ACTN3), mRNA.
ILMN_1725534	ACTN4	0	0	0.0893394	NA	506.288	31.9835	473.904	NA	1.06834	NA	0.0953642	2	2	2	2	2	2	0.545459	0.692772	Homo sapiens actinin, alpha 4 (ACTN4), mRNA.
ILMN_1798254	ACTR10	0	0	0.0472768	NA	526.474	17.5999	508.029	NA	1.03631	NA	0.0514511	2	2	2	2	2	2	0.734269	0.747348	Homo sapiens actin-related protein 10 homolog (S. cerevisiae) (ACTR10), mRNA.
ILMN_1792314	ACTR1A	0	0	0.114323	NA	1160.37	93.8028	1439.29	NA	0.806209	NA	-0.310774	2	2	2	2	2	2	0.0532227	0.254885	Homo sapiens ARP1 actin-related protein 1 homolog A, centractin alpha (yeast) (ACTR1A), mRNA.
ILMN_1695821	ACTR1B	0	0	0.0488121	NA	725.052	25.0255	599.847	NA	1.20873	NA	0.273491	2	2	2	2	2	2	0.0794869	0.315477	Homo sapiens ARP1 actin-related protein 1 homolog B, centractin beta (yeast) (ACTR1B), mRNA.
ILMN_2388605	ACTR2	0	0	0.040444	NA	2988.65	85.4702	2986.05	NA	1.00087	NA	0.00125814	2	2	2	2	2	2	0.996414	0.800302	Homo sapiens ARP2 actin-related protein 2 homolog (yeast) (ACTR2), transcript variant 1, mRNA.
ILMN_1657153	ACTR3	0.00376506	0	0.269016	NA	136.118	25.8927	181.215	NA	0.751141	NA	-0.412845	2	2	2	2	2	2	0.0268028	0.171999	Homo sapiens ARP3 actin-related protein 3 homolog (yeast) (ACTR3), mRNA.
ILMN_2346451	ACTR3B	0.301958	0.337349	0.0411788	NA	74.22	2.16112	74.3096	NA	0.998794	NA	-0.0017406	2	2	2	2	2	2	0.987374	0.799433	Homo sapiens ARP3 actin-related protein 3 homolog B (yeast) (ACTR3B), transcript variant 1, mRNA.
ILMN_2260392	ACTR3B	0	0	0.124526	NA	278.601	24.5316	199.188	NA	1.39868	NA	0.48407	2	2	2	2	2	2	0.00591817	0.0667104	Homo sapiens ARP3 actin-related protein 3 homolog B (yeast) (ACTR3B), transcript variant 1, mRNA.
ILMN_1787513	ACTR3B	0	0.00301205	0.10492	NA	220.868	16.3861	147.471	NA	1.49771	NA	0.582755	2	2	2	2	2	2	0.00118967	0.023031	Homo sapiens ARP3 actin-related protein 3 homolog B (yeast) (ACTR3B), transcript variant 2, mRNA.
ILMN_1652594	ACTR5	0	0	0.0432392	NA	368.173	11.2568	421.098	NA	0.874317	NA	-0.193772	2	2	2	2	2	2	0.201111	0.490539	Homo sapiens ARP5 actin-related protein 5 homolog (yeast) (ACTR5), mRNA.
ILMN_1697585	ACTR6	0	0	0.203172	NA	383.076	55.0342	428.739	NA	0.893494	NA	-0.16247	2	2	2	2	2	2	0.303432	0.575914	Homo sapiens ARP6 actin-related protein 6 homolog (yeast) (ACTR6), mRNA.
ILMN_1689162	ACTR8	0.0188253	0.0060241	0.0586868	NA	99.7758	4.14048	124.068	NA	0.8042	NA	-0.314374	2	2	2	2	2	2	0.0458827	0.235201	Homo sapiens ARP8 actin-related protein 8 homolog (yeast) (ACTR8), mRNA.
ILMN_1815392	ACTRT1	0.0421687	0.0210843	0.1015	NA	92.3739	6.62981	99.1122	NA	0.932014	NA	-0.101577	2	2	2	2	2	2	0.495444	0.6741	Homo sapiens actin-related protein T1 (ACTRT1), mRNA.
ILMN_1760490	ACVR1	0	0	0.268215	NA	423.723	80.3619	331.025	NA	1.28003	NA	0.356183	2	2	2	2	2	2	0.0872184	0.331999	Homo sapiens activin A receptor, type I (ACVR1), mRNA.
ILMN_1786544	ACVR1B	0.118976	0.106928	0.0644365	NA	81.917	3.73242	83.0225	NA	0.986684	NA	-0.0193395	2	2	2	2	2	2	0.889577	0.781615	Homo sapiens activin A receptor, type IB (ACVR1B), transcript variant 1, mRNA.
ILMN_1763916	ACVR1B	0.17997	0.537651	0.0609463	NA	78.5872	3.38676	69.755	NA	1.12662	NA	0.171999	2	2	2	2	2	2	0.262739	0.544397	Homo sapiens activin A receptor, type IB (ACVR1B), transcript variant 3, mRNA.
ILMN_1766723	ACVR1B	0.248494	0.620482	0.109538	NA	77.3441	5.99069	68.2876	NA	1.13262	NA	0.179667	2	2	2	2	2	2	0.264369	0.545786	Homo sapiens activin A receptor, type IB (ACVR1B), transcript variant 2, mRNA.
ILMN_2243308	ACVR1B	0	0	0.203456	NA	769.188	110.659	617.146	NA	1.24636	NA	0.317724	2	2	2	2	2	2	0.0873621	0.332159	Homo sapiens activin A receptor, type IB (ACVR1B), transcript variant 1, mRNA.
ILMN_1689217	ACVR1C	0.384789	0.331325	0.102624	NA	73.2427	5.31495	74.4376	NA	0.983948	NA	-0.023346	2	2	2	2	2	2	0.859764	0.775569	Homo sapiens activin A receptor, type IC (ACVR1C), mRNA.
ILMN_2152711	ACVR2A	0	0.00150602	0.0128165	NA	163.299	1.47991	164.834	NA	0.990685	NA	-0.0135017	2	2	2	2	2	2	0.926893	0.787035	Homo sapiens activin A receptor, type IIA (ACVR2A), mRNA.
ILMN_1668983	ACVR2B	0.0594879	0.0436747	0.0375256	NA	87.8206	2.33029	90.528	NA	0.970094	NA	-0.0438035	2	2	2	2	2	2	0.765661	0.753918	Homo sapiens activin A receptor, type IIB (ACVR2B), mRNA.
ILMN_1807493	ACVRL1	0.783133	0.942771	0.0365363	NA	64.8136	1.67446	59.7363	NA	1.08499	NA	0.117688	2	2	2	2	2	2	0.433624	0.646726	Homo sapiens activin A receptor type II-like 1 (ACVRL1), mRNA.
ILMN_1683883	ACY1	0	0	0.0617656	NA	294.927	12.8809	289.745	NA	1.01788	NA	0.0255717	2	2	2	2	2	2	0.871788	0.778527	Homo sapiens aminoacylase 1 (ACY1), mRNA.
ILMN_1670193	ACY3	0.480422	0.576807	0.0505773	NA	70.4113	2.51816	69.0895	NA	1.01913	NA	0.0273398	2	2	2	2	2	2	0.859475	0.775532	Homo sapiens aspartoacylase (aminocyclase) 3 (ACY3), mRNA.
ILMN_2319825	ACYP1	0.00150602	0.00150602	0.09627	NA	148.422	10.1036	164.486	NA	0.902339	NA	-0.148258	2	2	2	2	2	2	0.327798	0.593175	Homo sapiens acylphosphatase 1, erythrocyte (common) type (ACYP1), transcript variant 1, mRNA.
ILMN_1694233	ACYP1	0	0	0.0236915	NA	601.95	10.0841	619.623	NA	0.971478	NA	-0.0417473	2	2	2	2	2	2	0.77708	0.756998	Homo sapiens acylphosphatase 1, erythrocyte (common) type (ACYP1), transcript variant 1, mRNA.
ILMN_1686432	ACYP1	0.170181	0.186747	0.0249716	NA	78.357	1.38359	78.3928	NA	0.999544	NA	-0.000658438	2	2	2	2	2	2	0.995239	0.800302	Homo sapiens acylphosphatase 1, erythrocyte (common) type (ACYP1), transcript variant 2, mRNA.
ILMN_2158705	ACYP2	0.000753012	0.00451807	0.216661	NA	172.6	26.4428	141.864	NA	1.21666	NA	0.282926	2	2	2	2	2	2	0.13592	0.411813	Homo sapiens acylphosphatase 2, muscle type (ACYP2), mRNA.
ILMN_1803686	ADA	0	0	0.0202825	NA	1821.71	26.1268	889.205	NA	2.04869	NA	1.0347	2	2	2	2	2	2	9.94966e-07	0.000152589	Homo sapiens adenosine deaminase (ADA), mRNA.
ILMN_1745580	ADAD1	0.476657	0.971386	0.0499541	NA	70.4217	2.4875	56.9871	NA	1.23575	NA	0.305386	2	2	2	2	2	2	0.0524846	0.253232	Homo sapiens adenosine deaminase domain containing 1 (testis-specific) (ADAD1), mRNA.
ILMN_1745108	ADAD2	0.340361	0.0346385	0.0140984	NA	72.8527	0.726274	93.2408	NA	0.78134	NA	-0.355978	2	2	2	2	2	2	0.0246605	0.163214	Homo sapiens adenosine deaminase domain containing 2 (ADAD2), mRNA.
ILMN_1725043	ADAL	0.00225904	0.0060241	0.0998124	NA	136.843	9.65813	117.851	NA	1.16116	NA	0.215563	2	2	2	2	2	2	0.177448	0.466237	Homo sapiens adenosine deaminase-like (ADAL), mRNA.
ILMN_2148360	ADAM10	0.533133	0.963855	0.0593391	NA	69.4629	2.9146	58.0213	NA	1.1972	NA	0.259661	2	2	2	2	2	2	0.0964981	0.349737	Homo sapiens ADAM metallopeptidase domain 10 (ADAM10), mRNA.
ILMN_1711374	ADAM11	0.169428	0.433735	0.064632	NA	79.097	3.61487	71.7864	NA	1.10184	NA	0.139912	2	2	2	2	2	2	0.361804	0.611634	Homo sapiens ADAM metallopeptidase domain 11 (ADAM11), mRNA.
ILMN_1785393	ADAM12	0.59488	0.445783	0.0796781	NA	68.1858	3.84165	71.5462	NA	0.953031	NA	-0.0694045	2	2	2	2	2	2	0.636591	0.721802	Homo sapiens ADAM metallopeptidase domain 12 (meltrin alpha) (ADAM12), transcript variant 1, mRNA.
ILMN_1705689	ADAM12	0.124247	0.168675	0.0275814	NA	80.8747	1.5773	79.1449	NA	1.02186	NA	0.0311934	2	2	2	2	2	2	0.834745	0.771095	Homo sapiens ADAM metallopeptidase domain 12 (meltrin alpha) (ADAM12), transcript variant 1, mRNA.
ILMN_1726266	ADAM12	0.207078	0.46988	0.00632886	NA	76.7986	0.343687	71.1158	NA	1.07991	NA	0.11091	2	2	2	2	2	2	0.45618	0.655701	Homo sapiens ADAM metallopeptidase domain 12 (meltrin alpha) (ADAM12), transcript variant 2, mRNA.
ILMN_1756920	ADAM15	0	0	0.12363	NA	896.07	78.3339	793.103	NA	1.12983	NA	0.176104	2	2	2	2	2	2	0.282554	0.560778	Homo sapiens ADAM metallopeptidase domain 15 (ADAM15), transcript variant 4, mRNA.
ILMN_2384544	ADAM15	0.00150602	0.0060241	0.0569226	NA	149.064	5.99988	119.128	NA	1.25129	NA	0.323419	2	2	2	2	2	2	0.0417995	0.223701	Homo sapiens ADAM metallopeptidase domain 15 (ADAM15), transcript variant 2, mRNA.
ILMN_1751500	ADAM15	0.00677711	0.0707831	0.145581	NA	115.063	11.8447	86.0684	NA	1.33688	NA	0.418865	2	2	2	2	2	2	0.0171629	0.131661	Homo sapiens ADAM metallopeptidase domain 15 (ADAM15), transcript variant 4, mRNA.
ILMN_2121068	ADAM17	0.00225904	0.00150602	0.170621	NA	142.93	17.244	161.037	NA	0.887555	NA	-0.172091	2	2	2	2	2	2	0.272311	0.552395	Homo sapiens ADAM metallopeptidase domain 17 (ADAM17), mRNA.
ILMN_2201386	ADAM18	0.849398	0.807229	0.0629526	NA	62.4	2.77769	64.0629	NA	0.974042	NA	-0.0379448	2	2	2	2	2	2	0.793048	0.760277	Homo sapiens ADAM metallopeptidase domain 18 (ADAM18), mRNA.
ILMN_1713751	ADAM19	0.000753012	0	0.135327	NA	147.178	14.0836	226.564	NA	0.649608	NA	-0.622359	2	2	2	2	2	2	0.00071184	0.0164977	Homo sapiens ADAM metallopeptidase domain 19 (meltrin beta) (ADAM19), mRNA.
ILMN_1682225	ADAM19	0.176205	0.0436747	0.0188243	NA	78.2811	1.04198	91.1082	NA	0.85921	NA	-0.218917	2	2	2	2	2	2	0.14991	0.432188	Homo sapiens ADAM metallopeptidase domain 19 (meltrin beta) (ADAM19), transcript variant 1, mRNA.
ILMN_1788481	ADAM19	0.74247	0.489458	0.119476	NA	64.0795	5.41359	70.6136	NA	0.907467	NA	-0.140083	2	2	2	2	2	2	0.356445	0.609103	Homo sapiens ADAM metallopeptidase domain 19 (meltrin beta) (ADAM19), mRNA.
ILMN_1662675	ADAM2	0.478163	0.0436747	0.0745367	NA	70.7425	3.72851	90.3258	NA	0.783192	NA	-0.352563	2	2	2	2	2	2	0.0278974	0.175974	Homo sapiens ADAM metallopeptidase domain 2 (ADAM2), mRNA.
ILMN_1737629	ADAM20	0.612199	0.527108	0.241533	NA	65.0362	11.1075	70.0643	NA	0.928236	NA	-0.107436	2	2	2	2	2	2	0.473953	0.663993	Homo sapiens ADAM metallopeptidase domain 20 (ADAM20), mRNA.
ILMN_1812112	ADAM21	0.288404	0.310241	0.0797531	NA	75.2553	4.24394	75.0395	NA	1.00288	NA	0.00414296	2	2	2	2	2	2	0.990269	0.799885	Homo sapiens ADAM metallopeptidase domain 21 (ADAM21), mRNA.
ILMN_2351754	ADAM22	0.725151	0.301205	0.0327345	NA	65.9001	1.52538	75.5041	NA	0.872802	NA	-0.196274	2	2	2	2	2	2	0.194935	0.484686	Homo sapiens ADAM metallopeptidase domain 22 (ADAM22), transcript variant 5, mRNA.
ILMN_1706302	ADAM22	0.40512	0.623494	0.0221903	NA	71.721	1.12537	68.1824	NA	1.0519	NA	0.0729945	2	2	2	2	2	2	0.623768	0.717649	Homo sapiens ADAM metallopeptidase domain 22 (ADAM22), transcript variant 2, mRNA.
ILMN_1675210	ADAM22	0.221386	0.634036	0.0647282	NA	77.211	3.53392	67.9715	NA	1.13593	NA	0.183877	2	2	2	2	2	2	0.233301	0.520012	Homo sapiens ADAM metallopeptidase domain 22 (ADAM22), transcript variant 1, mRNA.
ILMN_2060086	ADAM23	0	0	0.0487177	NA	516.27	17.7848	305.821	NA	1.68814	NA	0.755438	2	2	2	2	2	2	6.04455e-05	0.00286357	Homo sapiens ADAM metallopeptidase domain 23 (ADAM23), mRNA.
ILMN_1664236	ADAM28	0.650602	0.652108	0.0215873	NA	67.4837	1.03011	67.6829	NA	0.997058	NA	-0.00425083	2	2	2	2	2	2	0.976173	0.798005	Homo sapiens ADAM metallopeptidase domain 28 (ADAM28), transcript variant 3, mRNA.
ILMN_1664631	ADAM28	0.262048	0.478916	0.0634498	NA	75.8016	3.4009	70.8611	NA	1.06972	NA	0.097235	2	2	2	2	2	2	0.525334	0.684489	Homo sapiens ADAM metallopeptidase domain 28 (ADAM28), transcript variant 3, mRNA.
ILMN_1802100	ADAM28	0.811747	0.956325	0.110068	NA	62.725	4.88187	58.4134	NA	1.07381	NA	0.102741	2	2	2	2	2	2	0.526651	0.684833	Homo sapiens ADAM metallopeptidase domain 28 (ADAM28), transcript variant 1, mRNA.
ILMN_2194158	ADAM29	0.215361	0.388554	0.09504	NA	78.3254	5.26374	72.8145	NA	1.07568	NA	0.105255	2	2	2	2	2	2	0.507005	0.678248	Homo sapiens ADAM metallopeptidase domain 29 (ADAM29), mRNA.
ILMN_2100871	ADAM30	0.44503	0.546687	0.0983598	NA	71.9767	5.00604	69.5991	NA	1.03416	NA	0.0484597	2	2	2	2	2	2	0.769348	0.755082	Homo sapiens ADAM metallopeptidase domain 30 (ADAM30), mRNA.
ILMN_2293012	ADAM32	0.591114	0.373494	0.0322971	NA	68.4835	1.56399	73.2804	NA	0.934541	NA	-0.0976704	2	2	2	2	2	2	0.51095	0.679794	Homo sapiens ADAM metallopeptidase domain 32 (ADAM32), mRNA.
ILMN_1806841	ADAM32	0.46988	0.748494	0.0851487	NA	71.0161	4.27582	65.4418	NA	1.08518	NA	0.117934	2	2	2	2	2	2	0.45096	0.653795	Homo sapiens ADAM metallopeptidase domain 32 (ADAM32), mRNA.
ILMN_1651657	ADAM33	0.0353916	0.0406627	0.0889121	NA	94.2055	5.92273	91.7448	NA	1.02682	NA	0.0381839	2	2	2	2	2	2	0.816546	0.766779	Homo sapiens ADAM metallopeptidase domain 33 (ADAM33), transcript variant 1, mRNA.
ILMN_1671297	ADAM33	0.0210843	0.0406627	0.000849648	NA	97.2649	0.058436	91.7635	NA	1.05995	NA	0.0839993	2	2	2	2	2	2	0.571183	0.700166	Homo sapiens ADAM metallopeptidase domain 33 (ADAM33), transcript variant 2, mRNA.
ILMN_1669486	ADAM3A	0.887048	0.915663	0.0198467	NA	62.2262	0.873266	61.1545	NA	1.01752	NA	0.0250625	2	2	2	2	2	2	0.866254	0.777367	Homo sapiens ADAM metallopeptidase domain 3A (cyritestin 1) (ADAM3A) on chromosome 8.
ILMN_2223911	ADAM3A	0.939006	0.99247	0.0743214	NA	59.1806	3.11013	53.3563	NA	1.10916	NA	0.149464	2	2	2	2	2	2	0.334327	0.595991	Homo sapiens ADAM metallopeptidase domain 3A (cyritestin 1) (ADAM3A) on chromosome 8.
ILMN_2302214	ADAM5P	0.521084	0.231928	0.117743	NA	70.1109	5.83723	77.1289	NA	0.90901	NA	-0.137633	2	2	2	2	2	2	0.364243	0.613013	Homo sapiens ADAM metallopeptidase domain 5 pseudogene (ADAM5P), non-coding RNA. XR_001288 XR_001289
ILMN_2143210	ADAM6	0.275602	0.317771	0.0991548	NA	76.198	5.34247	74.766	NA	1.01915	NA	0.0273716	2	2	2	2	2	2	0.876532	0.779525	Homo sapiens ADAM metallopeptidase domain 6 (pseudogene) (ADAM6), non-coding RNA.
ILMN_1750294	ADAM7	0.115211	0.0753012	0.00947556	NA	81.2345	0.54429	85.6494	NA	0.948454	NA	-0.0763498	2	2	2	2	2	2	0.606437	0.7131	Homo sapiens ADAM metallopeptidase domain 7 (ADAM7), mRNA.
ILMN_1708348	ADAM8	0.0414157	0.24247	0.0618826	NA	90.7341	3.97031	76.5813	NA	1.18481	NA	0.244654	2	2	2	2	2	2	0.116537	0.383833	Homo sapiens ADAM metallopeptidase domain 8 (ADAM8), mRNA.
ILMN_1727524	ADAM9	0.00978916	0.0301205	0.0513412	NA	106.687	3.87312	94.9346	NA	1.12379	NA	0.168374	2	2	2	2	2	2	0.269693	0.550097	Homo sapiens ADAM metallopeptidase domain 9 (meltrin gamma) (ADAM9), transcript variant 1, mRNA.
ILMN_2103107	ADAMDEC1	0.509036	0.746988	0.0277748	NA	69.8989	1.3728	65.531	NA	1.06665	NA	0.0930922	2	2	2	2	2	2	0.533089	0.687707	Homo sapiens ADAM-like, decysin 1 (ADAMDEC1), mRNA.
ILMN_1673566	ADAMTS1	0.586596	0.417169	0.0917715	NA	68.1552	4.42275	72.0822	NA	0.945521	NA	-0.0808193	2	2	2	2	2	2	0.583796	0.705646	Homo sapiens ADAM metallopeptidase with thrombospondin type 1 motif, 1 (ADAMTS1), mRNA.
ILMN_1751168	ADAMTS10	0.142319	0.239458	0.0670204	NA	80.974	3.83741	76.765	NA	1.05483	NA	0.0770109	2	2	2	2	2	2	0.61702	0.716166	Homo sapiens ADAM metallopeptidase with thrombospondin type 1 motif, 10 (ADAMTS10), mRNA.
ILMN_1660970	ADAMTS12	0.588102	0.603916	0.0152654	NA	68.4033	0.738363	68.524	NA	0.998239	NA	-0.00254339	2	2	2	2	2	2	0.985818	0.799116	Homo sapiens ADAM metallopeptidase with thrombospondin type 1 motif, 12 (ADAMTS12), mRNA.
ILMN_2286570	ADAMTS13	0.783886	0.825301	0.106328	NA	63.3638	4.76403	63.7377	NA	0.994133	NA	-0.00848886	2	2	2	2	2	2	0.934937	0.788506	Homo sapiens ADAM metallopeptidase with thrombospondin type 1 motif, 13 (ADAMTS13), transcript variant 1, mRNA.
ILMN_1787386	ADAMTS13	0.41491	0.447289	0.00253331	NA	71.3146	0.127747	71.4716	NA	0.997803	NA	-0.0031736	2	2	2	2	2	2	0.982844	0.798967	Homo sapiens ADAM metallopeptidase with thrombospondin type 1 motif, 13 (ADAMTS13), transcript variant 2, mRNA.
ILMN_2413732	ADAMTS13	0.121235	0.115964	0.0746261	NA	82.5181	4.35437	82.3014	NA	1.00263	NA	0.00379447	2	2	2	2	2	2	0.990569	0.799885	Homo sapiens ADAM metallopeptidase with thrombospondin type 1 motif, 13 (ADAMTS13), transcript variant 2, mRNA.
ILMN_2358134	ADAMTS14	0.625753	0.0993976	0.0670682	NA	67.5921	3.20551	83.2942	NA	0.811486	NA	-0.301362	2	2	2	2	2	2	0.0552076	0.259814	Homo sapiens ADAM metallopeptidase with thrombospondin type 1 motif, 14 (ADAMTS14), transcript variant 1, mRNA.
ILMN_1676452	ADAMTS14	0.768072	0.876506	0.0887395	NA	64.3862	4.04012	62.3147	NA	1.03324	NA	0.0471775	2	2	2	2	2	2	0.771025	0.755232	Homo sapiens ADAM metallopeptidase with thrombospondin type 1 motif, 14 (ADAMTS14), transcript variant 2, mRNA.
ILMN_1683781	ADAMTS15	0.480422	0.60241	0.0217476	NA	70.2497	1.08029	68.5679	NA	1.02453	NA	0.0349603	2	2	2	2	2	2	0.814239	0.766045	Homo sapiens ADAM metallopeptidase with thrombospondin type 1 motif, 15 (ADAMTS15), mRNA.
ILMN_1726247	ADAMTS16	0.519578	0.465361	0.0804345	NA	69.6161	3.95947	71.2265	NA	0.97739	NA	-0.0329942	2	2	2	2	2	2	0.815565	0.766493	Homo sapiens ADAM metallopeptidase with thrombospondin type 1 motif, 16 (ADAMTS16), mRNA.
ILMN_1682989	ADAMTS17	0.303464	0.248494	0.0942016	NA	75.25	5.01245	76.4234	NA	0.984647	NA	-0.022322	2	2	2	2	2	2	0.86728	0.777501	Homo sapiens ADAM metallopeptidase with thrombospondin type 1 motif, 17 (ADAMTS17), mRNA.
ILMN_1739872	ADAMTS18	0.339608	0.0527108	0.0902885	NA	74.4224	4.75139	89.3919	NA	0.83254	NA	-0.264409	2	2	2	2	2	2	0.091372	0.340308	Homo sapiens ADAM metallopeptidase with thrombospondin type 1 motif, 18 (ADAMTS18), mRNA.
ILMN_1770152	ADAMTS18	0.756024	0.864458	0.000535668	NA	65.3988	0.0247714	62.8597	NA	1.04039	NA	0.0571292	2	2	2	2	2	2	0.699456	0.739949	Homo sapiens ADAM metallopeptidase with thrombospondin type 1 motif, 18 (ADAMTS18), mRNA.
ILMN_1656171	ADAMTS19	0.0368976	0.0436747	0.00270464	NA	91.8214	0.175606	91.1805	NA	1.00703	NA	0.0101056	2	2	2	2	2	2	0.945465	0.791159	Homo sapiens ADAM metallopeptidase with thrombospondin type 1 motif, 19 (ADAMTS19), mRNA.
ILMN_1811765	ADAMTS2	0.148343	0.0436747	0.00328961	NA	79.2691	0.184388	90.5862	NA	0.875069	NA	-0.192532	2	2	2	2	2	2	0.202275	0.491663	Homo sapiens ADAM metallopeptidase with thrombospondin type 1 motif, 2 (ADAMTS2), transcript variant 2, mRNA.
ILMN_1796628	ADAMTS2	0.323042	0.182229	0.00870518	NA	73.3314	0.451391	78.5172	NA	0.933953	NA	-0.0985788	2	2	2	2	2	2	0.506999	0.678248	Homo sapiens ADAM metallopeptidase with thrombospondin type 1 motif, 2 (ADAMTS2), transcript variant 1, mRNA.
ILMN_1787908	ADAMTS20	0.606928	0.0542169	0.141063	NA	67.6008	6.74295	88.6178	NA	0.762835	NA	-0.390557	2	2	2	2	2	2	0.0200881	0.144445	Homo sapiens ADAM metallopeptidase with thrombospondin type 1 motif, 20 (ADAMTS20), mRNA.
ILMN_1651717	ADAMTS20	0.693524	0.391566	0.116675	NA	65.5135	5.40499	72.6719	NA	0.901496	NA	-0.149607	2	2	2	2	2	2	0.326159	0.592039	Homo sapiens ADAM metallopeptidase with thrombospondin type 1 motif, 20 (ADAMTS20), mRNA.
ILMN_1703803	ADAMTS3	0.329066	0.168675	0.104456	NA	74.8075	5.52542	79.2137	NA	0.944375	NA	-0.0825681	2	2	2	2	2	2	0.575502	0.70166	Homo sapiens ADAM metallopeptidase with thrombospondin type 1 motif, 3 (ADAMTS3), mRNA.
ILMN_2092933	ADAMTS4	0.611446	0.444277	0.0218963	NA	68.0916	1.05426	71.6303	NA	0.950598	NA	-0.0730929	2	2	2	2	2	2	0.621626	0.717245	Homo sapiens ADAM metallopeptidase with thrombospondin type 1 motif, 4 (ADAMTS4), mRNA.
ILMN_1681886	ADAMTS5	0.478163	0.519578	0.145936	NA	71.5804	7.38656	70.2004	NA	1.01966	NA	0.0280848	2	2	2	2	2	2	0.898456	0.782992	Homo sapiens ADAM metallopeptidase with thrombospondin type 1 motif, 5 (aggrecanase-2) (ADAMTS5), mRNA.
ILMN_1767362	ADAMTS6	0.183735	0.0436747	0.0176874	NA	77.7787	0.97277	90.9483	NA	0.855196	NA	-0.225673	2	2	2	2	2	2	0.13837	0.415452	Homo sapiens ADAM metallopeptidase with thrombospondin type 1 motif, 6 (ADAMTS6), mRNA.
ILMN_2211790	ADAMTS7	0.340361	0.475904	0.211905	NA	79.7177	11.9449	70.938	NA	1.12377	NA	0.168341	2	2	2	2	2	2	0.381591	0.622566	Homo sapiens ADAM metallopeptidase with thrombospondin type 1 motif, 7 (ADAMTS7), mRNA.
ILMN_1672403	ADAMTS8	0.539157	0.177711	0.157526	NA	70.1048	7.80881	78.8024	NA	0.889628	NA	-0.168726	2	2	2	2	2	2	0.278518	0.557352	Homo sapiens ADAM metallopeptidase with thrombospondin type 1 motif, 8 (ADAMTS8), mRNA.
ILMN_1805543	ADAMTS9	0	0	0.032583	NA	340.287	7.84009	193.338	NA	1.76006	NA	0.815625	2	2	2	2	2	2	2.30274e-05	0.00137815	Homo sapiens ADAM metallopeptidase with thrombospondin type 1 motif, 9 (ADAMTS9), mRNA.
ILMN_1684919	ADAMTSL1	0.788404	0.259036	0.0791537	NA	64.0924	3.58726	76.2884	NA	0.840134	NA	-0.251309	2	2	2	2	2	2	0.105747	0.366108	Homo sapiens ADAMTS-like 1 (ADAMTSL1), transcript variant 1, mRNA.
ILMN_1722621	ADAMTSL1	0.752259	0.759036	0.00859281	NA	65.4834	0.39788	65.2097	NA	1.0042	NA	0.00604275	2	2	2	2	2	2	0.967516	0.796936	Homo sapiens ADAMTS-like 1 (ADAMTSL1), transcript variant 2, mRNA.
ILMN_1705250	ADAMTSL1	0.211596	0.239458	0.0959704	NA	78.6044	5.3342	76.8085	NA	1.02338	NA	0.0333454	2	2	2	2	2	2	0.844445	0.773123	Homo sapiens ADAMTS-like 1 (ADAMTSL1), transcript variant 2, mRNA.
ILMN_1706992	ADAMTSL1	0.401355	0.623494	0.0105369	NA	71.6274	0.533674	68.2245	NA	1.04988	NA	0.0702206	2	2	2	2	2	2	0.635811	0.721485	Homo sapiens ADAMTS-like 1 (ADAMTSL1), transcript variant 3, mRNA.
ILMN_1721495	ADAMTSL2	0.0112952	0.0256024	0.0528696	NA	104.085	3.89117	97.7601	NA	1.0647	NA	0.0904464	2	2	2	2	2	2	0.551014	0.694306	Homo sapiens ADAMTS-like 2 (ADAMTSL2), mRNA.
ILMN_1798690	ADAMTSL3	0.345633	0.186747	0.0869411	NA	74.1883	4.56085	78.3601	NA	0.946761	NA	-0.0789277	2	2	2	2	2	2	0.59248	0.708495	Homo sapiens ADAMTS-like 3 (ADAMTSL3), mRNA.
ILMN_1687035	ADAMTSL4	0.244729	0.0828313	0.039484	NA	75.9678	2.12098	84.6926	NA	0.896983	NA	-0.156848	2	2	2	2	2	2	0.296539	0.570699	Homo sapiens ADAMTS-like 4 (ADAMTSL4), transcript variant 2, mRNA.
ILMN_1762294	ADAMTSL4	0.881777	0.623494	0.0532911	NA	61.7404	2.32653	68.213	NA	0.905112	NA	-0.143831	2	2	2	2	2	2	0.337977	0.598342	Homo sapiens ADAMTS-like 4 (ADAMTSL4), transcript variant 2, mRNA.
ILMN_1777683	ADAMTSL4	0.279367	0.887048	0.0323558	NA	74.4131	1.7025	62.1072	NA	1.19814	NA	0.260796	2	2	2	2	2	2	0.0912295	0.340306	Homo sapiens ADAMTS-like 4 (ADAMTSL4), transcript variant 1, mRNA.
ILMN_1793040	ADAMTSL5	0.0165663	0.0813253	0.0406902	NA	98.8934	2.84539	85.0032	NA	1.16341	NA	0.218357	2	2	2	2	2	2	0.154141	0.43732	Homo sapiens ADAMTS-like 5 (ADAMTSL5), mRNA.
ILMN_1763000	ADAP2	0.159639	0.153614	0.0789053	NA	80.095	4.46886	79.9287	NA	1.00208	NA	0.00299882	2	2	2	2	2	2	0.996044	0.800302	Homo sapiens ArfGAP with dual PH domains 2 (ADAP2), mRNA.
ILMN_1776777	ADAR	0	0	0.101162	NA	910.839	65.1542	1273.34	NA	0.715314	NA	-0.483352	2	2	2	2	2	2	0.00457223	0.0563427	Homo sapiens adenosine deaminase, RNA-specific (ADAR), transcript variant 1, mRNA.
ILMN_1706963	ADAR	0.190512	0.652108	0.186029	NA	83.6222	10.9998	67.684	NA	1.23548	NA	0.305071	2	2	2	2	2	2	0.0913041	0.340306	Homo sapiens adenosine deaminase, RNA-specific (ADAR), transcript variant 4, mRNA.
ILMN_2320964	ADAR	0	0	0.0813619	NA	1506.73	86.6847	1202.06	NA	1.25346	NA	0.32592	2	2	2	2	2	2	0.0434219	0.22865	Homo sapiens adenosine deaminase, RNA-specific (ADAR), transcript variant 2, mRNA.
ILMN_1657442	ADARB1	0.295181	0.120482	0.0404667	NA	74.4578	2.13055	82.1447	NA	0.906422	NA	-0.141745	2	2	2	2	2	2	0.344079	0.60203	Homo sapiens adenosine deaminase, RNA-specific, B1 (RED1 homolog rat) (ADARB1), transcript variant 4, mRNA.
ILMN_1697628	ADARB1	0.100904	0.263554	0.0296584	NA	82.8231	1.73694	76.222	NA	1.0866	NA	0.119827	2	2	2	2	2	2	0.423994	0.642675	Homo sapiens adenosine deaminase, RNA-specific, B1 (RED1 homolog rat) (ADARB1), transcript variant 1, mRNA.
ILMN_2319326	ADARB1	0	0	0.0908709	NA	206.887	13.2936	173.694	NA	1.1911	NA	0.252295	2	2	2	2	2	2	0.113812	0.379891	Homo sapiens adenosine deaminase, RNA-specific, B1 (RED1 homolog rat) (ADARB1), transcript variant 2, mRNA.
ILMN_1679797	ADARB1	0	0	0.0406801	NA	529.582	15.2335	428.545	NA	1.23577	NA	0.305407	2	2	2	2	2	2	0.0515742	0.251095	Homo sapiens adenosine deaminase, RNA-specific, B1 (RED1 homolog rat) (ADARB1), transcript variant 1, mRNA.
ILMN_1749493	ADARB2	0.314006	0.337349	0.141355	NA	76.8337	7.67975	74.3278	NA	1.03371	NA	0.0478375	2	2	2	2	2	2	0.798428	0.762062	Homo sapiens adenosine deaminase, RNA-specific, B2 (RED2 homolog rat) (ADARB2), mRNA.
ILMN_1657139	ADAT1	0	0	0.019013	NA	325.482	4.37587	290.755	NA	1.11944	NA	0.162777	2	2	2	2	2	2	0.279075	0.557677	Homo sapiens adenosine deaminase, tRNA-specific 1 (ADAT1), mRNA.
ILMN_1806275	ADAT3	0	0	0.0586229	NA	175.542	7.27667	197.298	NA	0.889728	NA	-0.168564	2	2	2	2	2	2	0.264566	0.545833	Homo sapiens adenosine deaminase, tRNA-specific 3, TAD3 homolog (S. cerevisiae) (ADAT3), mRNA.
ILMN_1659599	ADC	0.0436747	0.346386	0.0533082	NA	91.389	3.44487	73.9144	NA	1.23642	NA	0.306165	2	2	2	2	2	2	0.0523089	0.25304	Homo sapiens arginine decarboxylase (ADC), mRNA.
ILMN_1698777	ADCK1	0	0	0.0127202	NA	328.365	2.95348	301.913	NA	1.08761	NA	0.121167	2	2	2	2	2	2	0.416656	0.639588	Homo sapiens aarF domain containing kinase 1 (ADCK1), mRNA.
ILMN_1663132	ADCK2	0	0	0.0591673	NA	274.999	11.5053	294.087	NA	0.935094	NA	-0.0968167	2	2	2	2	2	2	0.514725	0.681242	Homo sapiens aarF domain containing kinase 2 (ADCK2), mRNA.
ILMN_1700349	ADCK4	0.00225904	0	0.184423	NA	144.135	18.7962	182.158	NA	0.791265	NA	-0.337767	2	2	2	2	2	2	0.0461785	0.236067	Homo sapiens aarF domain containing kinase 4 (ADCK4), mRNA.
ILMN_1761309	ADCK5	0.00451807	0.0150602	0.108989	NA	121.22	9.34209	102.527	NA	1.18232	NA	0.241623	2	2	2	2	2	2	0.135884	0.411787	Homo sapiens aarF domain containing kinase 5 (ADCK5), mRNA.
ILMN_2120555	ADCY1	0	0.0060241	0.101473	NA	174.193	12.4987	114.191	NA	1.52545	NA	0.609232	2	2	2	2	2	2	0.000778197	0.0171836	Homo sapiens adenylate cyclase 1 (brain) (ADCY1), mRNA.
ILMN_1810691	ADCY2	0.065512	0.0150602	0.0875277	NA	88.4306	5.47309	106.459	NA	0.830651	NA	-0.267686	2	2	2	2	2	2	0.0874183	0.332309	Homo sapiens adenylate cyclase 2 (brain) (ADCY2), mRNA.
ILMN_1676893	ADCY3	0	0	0.0132056	NA	394.473	3.68349	375.704	NA	1.04996	NA	0.0703304	2	2	2	2	2	2	0.635478	0.721485	Homo sapiens adenylate cyclase 3 (ADCY3), mRNA.
ILMN_2148944	ADCY4	0.323795	0.149096	0.00127722	NA	73.3907	0.0662816	80.2705	NA	0.914293	NA	-0.129272	2	2	2	2	2	2	0.386238	0.624419	Homo sapiens adenylate cyclase 4 (ADCY4), mRNA.
ILMN_1708588	ADCY5	0.822289	0.933735	0.0648829	NA	63.2094	2.89999	60.1514	NA	1.05084	NA	0.0715406	2	2	2	2	2	2	0.641806	0.72328	Homo sapiens adenylate cyclase 5 (ADCY5), mRNA.
ILMN_2311674	ADCY6	0.0060241	0.0150602	0.0723205	NA	113.359	5.79699	105.896	NA	1.07048	NA	0.0982548	2	2	2	2	2	2	0.5247	0.684489	Homo sapiens adenylate cyclase 6 (ADCY6), transcript variant 2, mRNA.
ILMN_1685156	ADCY6	0.00150602	0.0060241	0.00904213	NA	141.09	0.902096	118.038	NA	1.19529	NA	0.257365	2	2	2	2	2	2	0.0936993	0.344245	Homo sapiens adenylate cyclase 6 (ADCY6), transcript variant 2, mRNA.
ILMN_1655935	ADCY7	0.0143072	0.0256024	0.0490427	NA	100.98	3.50185	97.5406	NA	1.03527	NA	0.0500009	2	2	2	2	2	2	0.742053	0.749199	Homo sapiens adenylate cyclase 7 (ADCY7), mRNA.
ILMN_1754440	ADCY8	0.204819	0.121988	0.106599	NA	79.0153	5.95592	82.043	NA	0.963096	NA	-0.0542486	2	2	2	2	2	2	0.70544	0.74127	Homo sapiens adenylate cyclase 8 (brain) (ADCY8), mRNA.
ILMN_1654287	ADCY9	0.00677711	0.0060241	0.128475	NA	115.968	10.5352	128.112	NA	0.905207	NA	-0.14368	2	2	2	2	2	2	0.34606	0.603253	Homo sapiens adenylate cyclase 9 (ADCY9), mRNA.
ILMN_1763344	ADCYAP1	0.314006	0.108434	0.0267169	NA	73.4507	1.38761	82.6934	NA	0.888229	NA	-0.170996	2	2	2	2	2	2	0.255845	0.539777	Homo sapiens adenylate cyclase activating polypeptide 1 (pituitary) (ADCYAP1), transcript variant 2, mRNA.
ILMN_1711736	ADCYAP1R1	0.271837	0.762048	0.0993296	NA	76.3151	5.36011	65.113	NA	1.17204	NA	0.229023	2	2	2	2	2	2	0.152564	0.435022	Homo sapiens adenylate cyclase activating polypeptide 1 (pituitary) receptor type I (ADCYAP1R1), mRNA.
ILMN_1759252	ADD1	0	0	0.0636213	NA	865.728	38.9466	1089.15	NA	0.794866	NA	-0.331217	2	2	2	2	2	2	0.0367485	0.207712	Homo sapiens adducin 1 (alpha) (ADD1), transcript variant 4, mRNA.
ILMN_2356786	ADD1	0.369729	0.0948795	0.0910926	NA	73.3683	4.72581	83.8506	NA	0.874988	NA	-0.192664	2	2	2	2	2	2	0.208872	0.497985	Homo sapiens adducin 1 (alpha) (ADD1), transcript variant 1, mRNA.
ILMN_2336146	ADD2	0.0911145	0.0527108	0.0321119	NA	83.6166	1.89864	89.0498	NA	0.938987	NA	-0.0908223	2	2	2	2	2	2	0.540588	0.690958	Homo sapiens adducin 2 (beta) (ADD2), transcript variant beta-3a, mRNA.
ILMN_2286339	ADD2	0.207831	0.231928	0.0290865	NA	76.9603	1.58286	77.0933	NA	0.998275	NA	-0.00249117	2	2	2	2	2	2	0.984943	0.79901	Homo sapiens adducin 2 (beta) (ADD2), transcript variant beta-4, mRNA.
ILMN_1694133	ADD2	0.121988	0.0828313	0.150948	NA	85.1471	9.08829	84.6826	NA	1.00548	NA	0.00789118	2	2	2	2	2	2	0.998138	0.800302	Homo sapiens adducin 2 (beta) (ADD2), transcript variant beta-3a, mRNA.
ILMN_1678791	ADD2	0.191265	0.40512	0.0832813	NA	78.5152	4.62366	72.3608	NA	1.08505	NA	0.117765	2	2	2	2	2	2	0.450653	0.653451	Homo sapiens adducin 2 (beta) (ADD2), transcript variant beta-3a, mRNA.
ILMN_2311278	ADD3	0	0	0.0141389	NA	314.149	3.14078	335.705	NA	0.935789	NA	-0.0957443	2	2	2	2	2	2	0.519153	0.682454	Homo sapiens adducin 3 (gamma) (ADD3), transcript variant 3, mRNA.
ILMN_1814526	ADD3	0.00150602	0.00301205	0.0996084	NA	148.831	10.4827	150.904	NA	0.98626	NA	-0.0199599	2	2	2	2	2	2	0.877957	0.780175	Homo sapiens adducin 3 (gamma) (ADD3), transcript variant 3, mRNA.
ILMN_1787378	ADD3	0.00225904	0.00451807	0.0942145	NA	141.686	9.43907	134.438	NA	1.05391	NA	0.0757509	2	2	2	2	2	2	0.635792	0.721485	Homo sapiens adducin 3 (gamma) (ADD3), transcript variant 1, mRNA.
ILMN_1678501	ADD3	0.899849	0.963855	0.020317	NA	61.6707	0.88598	58.0681	NA	1.06204	NA	0.0868379	2	2	2	2	2	2	0.559653	0.69706	Homo sapiens adducin 3 (gamma) (ADD3), transcript variant 2, mRNA.
ILMN_1764309	ADH1A	0.722139	0.546687	0.00063893	NA	65.955	0.0297979	69.5836	NA	0.947853	NA	-0.0772655	2	2	2	2	2	2	0.602185	0.711169	Homo sapiens alcohol dehydrogenase 1A (class I), alpha polypeptide (ADH1A), mRNA.
ILMN_1811598	ADH1B	0.792922	0.808735	0.0398429	NA	64.5271	1.81793	64.0244	NA	1.00785	NA	0.0112832	2	2	2	2	2	2	0.942543	0.790433	Homo sapiens alcohol dehydrogenase IB (class I), beta polypeptide (ADH1B), mRNA.
ILMN_1740717	ADH1C	0.664157	0.932229	0.105227	NA	66.2051	4.92611	60.5004	NA	1.09429	NA	0.129996	2	2	2	2	2	2	0.417247	0.639866	Homo sapiens alcohol dehydrogenase 1C (class I), gamma polypeptide (ADH1C), mRNA.
ILMN_2136010	ADH4	0.790663	0.915663	0.0976581	NA	63.4659	4.38262	61.031	NA	1.0399	NA	0.0564393	2	2	2	2	2	2	0.729636	0.746413	Homo sapiens alcohol dehydrogenase 4 (class II), pi polypeptide (ADH4), mRNA.
ILMN_1738604	ADH5	0.000753012	0.00451807	0.106382	NA	154.826	11.6465	136.694	NA	1.13265	NA	0.179704	2	2	2	2	2	2	0.262492	0.544229	Homo sapiens alcohol dehydrogenase 5 (class III), chi polypeptide (ADH5), mRNA.
ILMN_1691175	ADH6	0.325301	0.0768072	0.0952832	NA	74.8587	5.04364	85.521	NA	0.875325	NA	-0.192109	2	2	2	2	2	2	0.210732	0.499185	Homo sapiens alcohol dehydrogenase 6 (class V) (ADH6), mRNA.
ILMN_2223359	ADH7	0.599398	0.649096	0.0045355	NA	68.3744	0.219283	67.6978	NA	1.01	NA	0.0143491	2	2	2	2	2	2	0.922654	0.786572	Homo sapiens alcohol dehydrogenase 7 (class IV), mu or sigma polypeptide (ADH7), mRNA.
ILMN_1702858	ADHFE1	0.0384036	0.0301205	0.0520469	NA	91.8244	3.37939	94.9155	NA	0.967433	NA	-0.0477662	2	2	2	2	2	2	0.744303	0.749774	Homo sapiens alcohol dehydrogenase, iron containing, 1 (ADHFE1), nuclear gene encoding mitochondrial protein, mRNA.
ILMN_2363634	ADHFE1	0.408133	0.381024	0.0248669	NA	71.619	1.25932	73.0201	NA	0.980813	NA	-0.0279503	2	2	2	2	2	2	0.849138	0.773446	Homo sapiens alcohol dehydrogenase, iron containing, 1 (ADHFE1), transcript variant 1, mRNA.
ILMN_1813975	ADI1	0.158886	0.323795	0.0370229	NA	79.1278	2.0715	74.5445	NA	1.06148	NA	0.0860825	2	2	2	2	2	2	0.566033	0.69902	Homo sapiens acireductone dioxygenase 1 (ADI1), mRNA.
ILMN_1743331	ADIG	0.138554	0.47741	0.119129	NA	82.8109	6.97574	70.872	NA	1.16846	NA	0.224606	2	2	2	2	2	2	0.169406	0.456318	Homo sapiens adipogenin (ADIG), mRNA.
ILMN_1775045	ADIPOQ	0.756024	0.793675	0.0299362	NA	65.4471	1.38539	64.3132	NA	1.01763	NA	0.0252128	2	2	2	2	2	2	0.866674	0.777369	Homo sapiens adiponectin, C1Q and collagen domain containing (ADIPOQ), mRNA.
ILMN_2096322	ADIPOR1	0	0	0.00972119	NA	695.536	4.78106	821.633	NA	0.84653	NA	-0.240368	2	2	2	2	2	2	0.115697	0.382672	Homo sapiens adiponectin receptor 1 (ADIPOR1), mRNA.
ILMN_2224833	ADIPOR2	0	0	0.0570436	NA	2135.18	86.1244	1584.59	NA	1.34746	NA	0.430247	2	2	2	2	2	2	0.00906493	0.0894218	Homo sapiens adiponectin receptor 2 (ADIPOR2), mRNA.
ILMN_2358628	ADK	0.464608	0.528614	0.0818609	NA	71.1072	4.11599	69.9319	NA	1.01681	NA	0.0240446	2	2	2	2	2	2	0.886528	0.781214	Homo sapiens adenosine kinase (ADK), transcript variant ADK-short, mRNA.
ILMN_1768062	ADK	0.00677711	0.143072	0.115839	NA	115.577	9.46698	80.4485	NA	1.43666	NA	0.522718	2	2	2	2	2	2	0.00315839	0.0444076	Homo sapiens adenosine kinase (ADK), transcript variant ADK-long, mRNA.
ILMN_1801020	ADK	0	0.00150602	0.0990437	NA	243.189	17.0316	159.425	NA	1.52541	NA	0.609201	2	2	2	2	2	2	0.000764069	0.0170055	Homo sapiens adenosine kinase (ADK), transcript variant ADK-short, mRNA.
ILMN_1708934	ADM	0	0	0.0990511	NA	7557.77	529.343	5521.93	NA	1.36868	NA	0.452788	2	2	2	2	2	2	0.00788516	0.081577	Homo sapiens adrenomedullin (ADM), mRNA.
ILMN_1702933	ADM2	0	0.00451807	0.125494	NA	393.437	34.9127	142.162	NA	2.76752	NA	1.4686	2	2	2	2	2	2	1.31587e-08	6.45769e-06	Homo sapiens adrenomedullin 2 (ADM2), mRNA.
ILMN_1657993	ADNP	0	0	0.0151501	NA	245.547	2.63047	259.887	NA	0.944821	NA	-0.0818867	2	2	2	2	2	2	0.580774	0.70414	Homo sapiens activity-dependent neuroprotector homeobox (ADNP), transcript variant 2, mRNA.
ILMN_1666019	ADNP	0.0180723	0.0346385	0.0017821	NA	98.3543	0.12394	93.3355	NA	1.05377	NA	0.0755624	2	2	2	2	2	2	0.610164	0.714348	Homo sapiens activity-dependent neuroprotector homeobox (ADNP), transcript variant 1, mRNA.
ILMN_2080751	ADNP2	0	0	0.094461	NA	451.321	30.1455	574.714	NA	0.785296	NA	-0.348691	2	2	2	2	2	2	0.0307455	0.186283	Homo sapiens ADNP homeobox 2 (ADNP2), mRNA.
ILMN_1690352	ADO	0	0	0.0174108	NA	267.396	3.292	285.801	NA	0.935603	NA	-0.0960319	2	2	2	2	2	2	0.517919	0.68236	Homo sapiens 2-aminoethanethiol (cysteamine) dioxygenase (ADO), mRNA.
ILMN_2373444	ADORA1	0.115211	0.186747	0.141879	NA	85.9497	8.62278	78.3621	NA	1.09683	NA	0.133336	2	2	2	2	2	2	0.431522	0.646336	Homo sapiens adenosine A1 receptor (ADORA1), transcript variant 1, mRNA.
ILMN_2275396	ADORA1	0.156626	0.76506	0.103475	NA	81.164	5.93857	64.9889	NA	1.24889	NA	0.320645	2	2	2	2	2	2	0.0505747	0.248633	Homo sapiens adenosine A1 receptor (ADORA1), transcript variant 1, mRNA.
ILMN_1807372	ADORA2A	0.0783133	0.0286145	0.127695	NA	87.3642	7.88845	95.9318	NA	0.91069	NA	-0.134968	2	2	2	2	2	2	0.374137	0.618694	Homo sapiens adenosine A2a receptor (ADORA2A), mRNA.
ILMN_1703946	ADORA2B	0.00828313	0.00150602	0.0770172	NA	108.013	5.88233	162.201	NA	0.665921	NA	-0.586577	2	2	2	2	2	2	0.000868032	0.0185617	Homo sapiens adenosine A2b receptor (ADORA2B), mRNA.
ILMN_1730710	ADORA3	0	0	0.0148009	NA	220.649	2.30927	269.543	NA	0.818604	NA	-0.288762	2	2	2	2	2	2	0.062435	0.277168	Homo sapiens adenosine A3 receptor (ADORA3), transcript variant 2, mRNA.
ILMN_1733259	ADORA3	0.701054	0.277108	0.0247378	NA	66.5666	1.1644	76.0148	NA	0.875706	NA	-0.191481	2	2	2	2	2	2	0.205163	0.494341	Homo sapiens adenosine A3 receptor (ADORA3), transcript variant 3, mRNA.
ILMN_1793959	ADPGK	0	0	0.0219491	NA	569.031	8.83155	413.123	NA	1.37739	NA	0.461935	2	2	2	2	2	2	0.00515339	0.0611252	Homo sapiens ADP-dependent glucokinase (ADPGK), mRNA.
ILMN_1794512	ADPRH	0.0150602	0.00903614	0.067269	NA	101.868	4.84549	110.972	NA	0.917957	NA	-0.123502	2	2	2	2	2	2	0.409304	0.636445	Homo sapiens ADP-ribosylarginine hydrolase (ADPRH), mRNA.
ILMN_1795788	ADPRHL1	0.790663	0.625	0.0105908	NA	64.5643	0.483512	68.1652	NA	0.947174	NA	-0.0782985	2	2	2	2	2	2	0.597346	0.709509	Homo sapiens ADP-ribosylhydrolase like 1 (ADPRHL1), transcript variant 1, mRNA.
ILMN_1788530	ADPRHL1	0.130271	0.126506	0.0508121	NA	80.6925	2.89925	81.4639	NA	0.99053	NA	-0.0137272	2	2	2	2	2	2	0.921723	0.786312	Homo sapiens ADP-ribosylhydrolase like 1 (ADPRHL1), transcript variant 1, mRNA.
ILMN_1760335	ADPRHL1	0.000753012	0.0286145	0.0195196	NA	145.396	2.00682	96.1224	NA	1.51261	NA	0.597044	2	2	2	2	2	2	0.000630442	0.0151374	Homo sapiens ADP-ribosylhydrolase like 1 (ADPRHL1), transcript variant 2, mRNA.
ILMN_1811480	ADPRHL2	0	0	0.0416899	NA	426.953	12.5863	680.072	NA	0.627806	NA	-0.671609	2	2	2	2	2	2	0.000206349	0.00687622	Homo sapiens ADP-ribosylhydrolase like 2 (ADPRHL2), mRNA.
ILMN_1709167	ADRA1A	0.160392	0.0828313	0.0253003	NA	78.865	1.4109	84.5099	NA	0.933204	NA	-0.0997358	2	2	2	2	2	2	0.50215	0.676192	Homo sapiens adrenergic, alpha-1A-, receptor (ADRA1A), transcript variant 2, mRNA.
ILMN_1653821	ADRA1A	0.826807	0.73494	0.00790737	NA	63.9235	0.357419	65.9247	NA	0.969645	NA	-0.0444715	2	2	2	2	2	2	0.763538	0.753566	Homo sapiens adrenergic, alpha-1A-, receptor (ADRA1A), transcript variant 3, mRNA.
ILMN_1669227	ADRA1A	0.0233434	0.0210843	0.0928516	NA	97.8038	6.42141	99.0513	NA	0.987406	NA	-0.0182853	2	2	2	2	2	2	0.888472	0.781473	Homo sapiens adrenergic, alpha-1A-, receptor (ADRA1A), transcript variant 4, mRNA.
ILMN_1780551	ADRA1A	0.0594879	0.0677711	0.105971	NA	89.7344	6.72404	87.0691	NA	1.03061	NA	0.0435015	2	2	2	2	2	2	0.798074	0.761835	Homo sapiens adrenergic, alpha-1A-, receptor (ADRA1A), transcript variant 1, mRNA.
ILMN_1813598	ADRA1A	0.69503	0.971386	0.133251	NA	64.8218	6.10768	57.3188	NA	1.1309	NA	0.177473	2	2	2	2	2	2	0.285287	0.562952	Homo sapiens adrenergic, alpha-1A-, receptor (ADRA1A), transcript variant 3, mRNA.
ILMN_1679754	ADRA1B	0.125753	0.0707831	0.000906286	NA	80.5966	0.0516496	86.2753	NA	0.934179	NA	-0.0982295	2	2	2	2	2	2	0.50848	0.678686	Homo sapiens adrenergic, alpha-1B-, receptor (ADRA1B), mRNA.
ILMN_1716421	ADRA1D	0.448795	0.560241	0.12189	NA	72.2113	6.22384	69.3256	NA	1.04163	NA	0.0588365	2	2	2	2	2	2	0.732286	0.746781	Homo sapiens adrenergic, alpha-1D-, receptor (ADRA1D), mRNA.
ILMN_1659371	ADRA2A	0.197289	0.0557229	0.0641	NA	77.8195	3.52721	88.4338	NA	0.879975	NA	-0.184466	2	2	2	2	2	2	0.224448	0.510955	Homo sapiens adrenergic, alpha-2A-, receptor (ADRA2A), mRNA.
ILMN_1677868	ADRA2B	0.00527108	0.00451807	0.0539348	NA	116.839	4.45597	134.685	NA	0.867497	NA	-0.20507	2	2	2	2	2	2	0.178154	0.466711	Homo sapiens adrenergic, alpha-2B-, receptor (ADRA2B), mRNA.
ILMN_1733963	ADRA2C	0.00978916	0.0406627	0.028219	NA	105.248	2.10011	91.8334	NA	1.14608	NA	0.196706	2	2	2	2	2	2	0.195008	0.484686	PREDICTED: Homo sapiens adrenergic, alpha-2C-, receptor (ADRA2C), mRNA.
ILMN_1804255	ADRB1	0.728163	0.527108	0.029926	NA	65.8481	1.3934	70.0455	NA	0.940076	NA	-0.08915	2	2	2	2	2	2	0.547974	0.69323	Homo sapiens adrenergic, beta-1-, receptor (ADRB1), mRNA.
ILMN_1695590	ADRB2	0.103163	0.495482	0.0215582	NA	82.5167	1.25788	70.5146	NA	1.17021	NA	0.226764	2	2	2	2	2	2	0.137259	0.413779	Homo sapiens adrenergic, beta-2-, receptor, surface (ADRB2), mRNA.
ILMN_1694007	ADRB3	0.304217	0.108434	0.126356	NA	76.5622	6.84063	82.8604	NA	0.92399	NA	-0.11405	2	2	2	2	2	2	0.447789	0.652607	Homo sapiens adrenergic, beta-3-, receptor (ADRB3), mRNA.
ILMN_1673330	ADRBK1	0.887048	0.950301	0.0389617	NA	61.7812	1.70208	59.1889	NA	1.0438	NA	0.0618419	2	2	2	2	2	2	0.680587	0.734636	Homo sapiens adrenergic, beta, receptor kinase 1 (ADRBK1), mRNA.
ILMN_1668900	ADRBK2	0.542169	0.341867	0.270815	NA	68.5844	13.1336	74.2065	NA	0.924237	NA	-0.113665	2	2	2	2	2	2	0.4529	0.654396	Homo sapiens adrenergic, beta, receptor kinase 2 (ADRBK2), mRNA.
ILMN_1760143	ADRM1	0	0	0.0122665	NA	1068.76	9.27007	1264.39	NA	0.845274	NA	-0.242509	2	2	2	2	2	2	0.11274	0.378373	Homo sapiens adhesion regulating molecule 1 (ADRM1), transcript variant 2, mRNA.
ILMN_2389013	ADRM1	0	0	0.0470594	NA	1112.65	37.0246	1123.56	NA	0.990288	NA	-0.0140806	2	2	2	2	2	2	0.920437	0.786015	Homo sapiens adhesion regulating molecule 1 (ADRM1), transcript variant 2, mRNA.
ILMN_1790757	ADSL	0	0	0.082884	NA	5001.23	293.111	4466.21	NA	1.11979	NA	0.163232	2	2	2	2	2	2	0.296098	0.570241	Homo sapiens adenylosuccinate lyase (ADSL), mRNA.
ILMN_2092664	ADSS	0	0	0.096812	NA	1686.72	115.467	1418.41	NA	1.18917	NA	0.249951	2	2	2	2	2	2	0.118998	0.388226	Homo sapiens adenylosuccinate synthase (ADSS), mRNA.
ILMN_1720235	ADSSL1	0.00150602	0.00150602	0.0301364	NA	135.843	2.89477	167.329	NA	0.811835	NA	-0.300742	2	2	2	2	2	2	0.0535996	0.256044	Homo sapiens adenylosuccinate synthase like 1 (ADSSL1), transcript variant 2, mRNA.
ILMN_2240009	ADSSL1	0.15512	0.0828313	0.0158297	NA	79.0818	0.885184	84.7096	NA	0.933564	NA	-0.0991788	2	2	2	2	2	2	0.504466	0.677333	Homo sapiens adenylosuccinate synthase like 1 (ADSSL1), transcript variant 2, mRNA.
ILMN_1749804	ADSSL1	0.674699	0.475904	0.0595195	NA	66.6704	2.80593	70.9266	NA	0.939991	NA	-0.0892808	2	2	2	2	2	2	0.547206	0.693035	Homo sapiens adenylosuccinate synthase like 1 (ADSSL1), transcript variant 1, mRNA.
ILMN_1736178	AEBP1	0	0.00150602	0.0815238	NA	174.548	10.062	165.596	NA	1.05406	NA	0.0759614	2	2	2	2	2	2	0.628291	0.719699	Homo sapiens AE binding protein 1 (AEBP1), mRNA.
ILMN_1803376	AEBP2	0	0	0.020951	NA	327.416	4.85053	361.111	NA	0.906692	NA	-0.141316	2	2	2	2	2	2	0.344759	0.602373	Homo sapiens AE binding protein 2 (AEBP2), mRNA.
ILMN_1712944	AES	0	0	0.102274	NA	854.634	61.8058	842.251	NA	1.0147	NA	0.021057	2	2	2	2	2	2	0.910467	0.784989	Homo sapiens amino-terminal enhancer of split (AES), transcript variant 2, mRNA.
ILMN_1707958	AES	0.0760542	0.216867	0.0278231	NA	85.4982	1.68208	77.6473	NA	1.10111	NA	0.138957	2	2	2	2	2	2	0.354764	0.608276	Homo sapiens amino-terminal enhancer of split (AES), transcript variant 1, mRNA.
ILMN_2333107	AES	0	0	0.22279	NA	639.819	100.795	551.073	NA	1.16104	NA	0.21542	2	2	2	2	2	2	0.26564	0.546457	Homo sapiens amino-terminal enhancer of split (AES), transcript variant 3, mRNA.
ILMN_1701998	AFAP1	0.0670181	0.0301205	0.0187317	NA	86.3949	1.14433	95.5764	NA	0.903936	NA	-0.145708	2	2	2	2	2	2	0.330293	0.59366	Homo sapiens actin filament associated protein 1 (AFAP1), transcript variant 2, mRNA.
ILMN_1651235	AFAP1	0.234187	0.0918675	0.0890871	NA	77.0512	4.85377	83.9754	NA	0.917544	NA	-0.12415	2	2	2	2	2	2	0.408279	0.635897	Homo sapiens actin filament associated protein 1 (AFAP1), transcript variant 2, mRNA.
ILMN_1660424	AFAP1	0.641566	0.777108	0.113843	NA	66.7829	5.37595	64.6274	NA	1.03335	NA	0.0473329	2	2	2	2	2	2	0.783412	0.758718	Homo sapiens actin filament associated protein 1 (AFAP1), transcript variant 1, mRNA.
ILMN_1694140	AFAP1L1	0.0760542	0.063253	0.0274507	NA	85.3157	1.65603	87.9117	NA	0.97047	NA	-0.0432444	2	2	2	2	2	2	0.769173	0.755043	Homo sapiens actin filament associated protein 1-like 1 (AFAP1L1), mRNA.
ILMN_2404917	AFAP1L2	0.0594879	0.0301205	0.119942	NA	89.6187	7.60074	95.0044	NA	0.943311	NA	-0.0841949	2	2	2	2	2	2	0.56771	0.699634	Homo sapiens actin filament associated protein 1-like 2 (AFAP1L2), transcript variant 2, mRNA.
ILMN_1730995	AFAP1L2	0.0112952	0.0331325	0.0564108	NA	105.34	4.20187	94.1825	NA	1.11847	NA	0.161528	2	2	2	2	2	2	0.290692	0.567683	Homo sapiens actin filament associated protein 1-like 2 (AFAP1L2), transcript variant 1, mRNA.
ILMN_1702696	AFAR3	0.0978916	0.0286145	0.164685	NA	88.7323	10.3329	96.4297	NA	0.920176	NA	-0.120019	2	2	2	2	2	2	0.428522	0.644901	Homo sapiens aflatoxin B1 aldehyde reductase 3 (AFAR3), mRNA.
ILMN_2084562	AFARP1	0.213102	0.0707831	0.102316	NA	78.4627	5.67667	86.3319	NA	0.90885	NA	-0.137886	2	2	2	2	2	2	0.36177	0.61163	Homo sapiens AKR7 family pseudogene (AFARP1), non-coding RNA.
ILMN_1769563	AFARP1	0.502259	0.783133	0.0694651	NA	70.1866	3.44751	64.4929	NA	1.08828	NA	0.122054	2	2	2	2	2	2	0.427792	0.644731	Homo sapiens AKR7 family pseudogene (AFARP1), non-coding RNA.
ILMN_2129015	AFF1	0	0	0.0282941	NA	185.354	3.70836	231.585	NA	0.800369	NA	-0.321262	2	2	2	2	2	2	0.0404969	0.219725	Homo sapiens AF4/FMR2 family, member 1 (AFF1), mRNA.
ILMN_1725889	AFF2	0	0.00150602	0.0284542	NA	257.832	5.18762	161.534	NA	1.59615	NA	0.674593	2	2	2	2	2	2	0.0001926	0.00667983	Homo sapiens AF4/FMR2 family, member 2 (AFF2), mRNA.
ILMN_1677951	AFF3	0.625	0.304217	0.029154	NA	67.8344	1.39841	75.2937	NA	0.900931	NA	-0.150512	2	2	2	2	2	2	0.315366	0.584051	Homo sapiens AF4/FMR2 family, member 3 (AFF3), transcript variant 2, mRNA.
ILMN_1775235	AFF3	0.151355	0.0828313	0.10818	NA	81.5688	6.23962	84.4906	NA	0.965419	NA	-0.0507729	2	2	2	2	2	2	0.721903	0.74442	Homo sapiens AF4/FMR2 family, member 3 (AFF3), transcript variant 2, mRNA.
ILMN_1708502	AFF4	0	0	0.0312429	NA	179.46	3.96464	331.618	NA	0.541163	NA	-0.885865	2	2	2	2	2	2	8.12922e-06	0.000673327	Homo sapiens AF4/FMR2 family, member 4 (AFF4), mRNA.
ILMN_2409898	AFG3L1	0.283133	0.125	0.0506271	NA	74.8881	2.6809	81.6604	NA	0.917068	NA	-0.124899	2	2	2	2	2	2	0.403346	0.633473	Homo sapiens AFG3 ATPase family gene 3-like 1 (S. cerevisiae) (AFG3L1), transcript variant 3, non-coding RNA.
ILMN_1699172	AFG3L1	0.778614	0.5	0.0370725	NA	64.8667	1.70043	70.3959	NA	0.921456	NA	-0.118012	2	2	2	2	2	2	0.428687	0.644944	Homo sapiens AFG3 ATPase family gene 3-like 1 (S. cerevisiae) (AFG3L1), transcript variant 1, non-coding RNA.
ILMN_2295698	AFG3L1	0.442771	0.603916	0.144257	NA	72.7827	7.42418	68.5201	NA	1.06221	NA	0.087067	2	2	2	2	2	2	0.618739	0.716787	Homo sapiens AFG3 ATPase family gene 3-like 1 (S. cerevisiae) (AFG3L1), transcript variant 3, non-coding RNA.
ILMN_1705447	AFG3L1	0	0	0.0248899	NA	288.664	5.08044	194.416	NA	1.48478	NA	0.570245	2	2	2	2	2	2	0.000967134	0.020154	Homo sapiens AFG3 ATPase family gene 3-like 1 (yeast) (AFG3L1), transcript variant 2, mRNA.
ILMN_2066124	AFG3L2	0	0	0.119285	NA	945.148	79.7207	1183.89	NA	0.798343	NA	-0.32492	2	2	2	2	2	2	0.0448567	0.232873	Homo sapiens AFG3 ATPase family gene 3-like 2 (yeast) (AFG3L2), nuclear gene encoding mitochondrial protein, mRNA.
ILMN_1777797	AFM	0.921687	0.861446	0.0792957	NA	59.6889	3.34679	62.9741	NA	0.947833	NA	-0.0772952	2	2	2	2	2	2	0.600225	0.710362	Homo sapiens afamin (AFM), mRNA.
ILMN_2095653	AFMID	0.182229	0.0406627	0.0600131	NA	78.49	3.33077	91.8795	NA	0.854271	NA	-0.227234	2	2	2	2	2	2	0.138561	0.415583	Homo sapiens arylformamidase (AFMID), mRNA.
ILMN_1782204	AFP	0.0707831	0.0165663	0.0756842	NA	87.0011	4.65602	101.96	NA	0.853289	NA	-0.228893	2	2	2	2	2	2	0.137609	0.414373	Homo sapiens alpha-fetoprotein (AFP), mRNA.
ILMN_1767722	AFTPH	0.0210843	0.0165663	0.00048724	NA	97.589	0.0336224	100.698	NA	0.969125	NA	-0.0452447	2	2	2	2	2	2	0.759624	0.753261	Homo sapiens aftiphilin (AFTPH), transcript variant 1, mRNA.
ILMN_2402766	AFTPH	0	0	0.0197925	NA	201.823	2.8246	201.667	NA	1.00077	NA	0.001113	2	2	2	2	2	2	0.994758	0.800302	Homo sapiens aftiphilin (AFTPH), transcript variant 2, mRNA.
ILMN_2342841	AFTPH	0.146837	0.260542	0.0335343	NA	79.5193	1.88559	76.2662	NA	1.04265	NA	0.0602608	2	2	2	2	2	2	0.687208	0.736799	Homo sapiens aftiphilin (AFTPH), transcript variant 1, mRNA.
ILMN_1802631	AGA	0.00753012	0.0301205	0.0444386	NA	111.713	3.51033	95.8032	NA	1.16607	NA	0.22165	2	2	2	2	2	2	0.149005	0.430795	Homo sapiens aspartylglucosaminidase (AGA), mRNA.
ILMN_2245223	AGAP1	0.541416	0.612952	0.0275754	NA	69.1683	1.34869	68.3691	NA	1.01169	NA	0.016767	2	2	2	2	2	2	0.911356	0.785176	Homo sapiens ArfGAP with GTPase domain, ankyrin repeat and PH domain 1 (AGAP1), transcript variant 1, mRNA.
ILMN_2318481	AGAP1	0.273343	0.376506	0.0431272	NA	74.6904	2.27772	73.198	NA	1.02039	NA	0.0291167	2	2	2	2	2	2	0.848417	0.773446	Homo sapiens ArfGAP with GTPase domain, ankyrin repeat and PH domain 1 (AGAP1), transcript variant 1, mRNA.
ILMN_1735591	AGAP2	0.456325	0.391566	0.0127133	NA	70.6959	0.635532	72.6647	NA	0.972906	NA	-0.0396272	2	2	2	2	2	2	0.788476	0.759659	Homo sapiens ArfGAP with GTPase domain, ankyrin repeat and PH domain 2 (AGAP2), transcript variant 2, mRNA.
ILMN_2269136	AGAP3	0.00225904	0.00451807	0.0266616	NA	130.054	2.45186	141.818	NA	0.917048	NA	-0.124931	2	2	2	2	2	2	0.402401	0.6334	Homo sapiens ArfGAP with GTPase domain, ankyrin repeat and PH domain 3 (AGAP3), transcript variant 2, mRNA.
ILMN_2362126	AGAP3	0.0338855	0.0963855	0.0127608	NA	92.2084	0.832022	83.8303	NA	1.09994	NA	0.137427	2	2	2	2	2	2	0.358112	0.609847	Homo sapiens ArfGAP with GTPase domain, ankyrin repeat and PH domain 3 (AGAP3), transcript variant 2, mRNA.
ILMN_2120103	AGAP7	0.404367	0.0677711	0.175574	NA	75.3333	9.35258	87.1894	NA	0.864019	NA	-0.210864	2	2	2	2	2	2	0.18764	0.476529	Homo sapiens ArfGAP with GTPase domain, ankyrin repeat and PH domain 7 (AGAP7), mRNA.
ILMN_2100055	AGBL1	0.835843	0.846386	0.0328124	NA	63.6853	1.47762	63.3196	NA	1.00577	NA	0.00830756	2	2	2	2	2	2	0.957416	0.794502	Homo sapiens ATP/GTP binding protein-like 1 (AGBL1), mRNA.
ILMN_1688627	AGBL2	0.541416	0.40512	0.0614468	NA	69.2451	3.00866	72.3686	NA	0.956839	NA	-0.0636522	2	2	2	2	2	2	0.665158	0.731062	Homo sapiens ATP/GTP binding protein-like 2 (AGBL2), mRNA.
ILMN_2196642	AGBL4	0.454819	0.713855	0.0172571	NA	70.6857	0.862552	66.5146	NA	1.06271	NA	0.0877459	2	2	2	2	2	2	0.555226	0.695294	Homo sapiens ATP/GTP binding protein-like 4 (AGBL4), mRNA.
ILMN_2308689	AGBL5	0	0	0.0473799	NA	646.042	21.6441	596.472	NA	1.08311	NA	0.115174	2	2	2	2	2	2	0.446245	0.652197	Homo sapiens ATP/GTP binding protein-like 5 (AGBL5), transcript variant 3, mRNA.
ILMN_2290776	AGBL5	0.000753012	0.00451807	0.0259848	NA	156.035	2.867	134.028	NA	1.1642	NA	0.21934	2	2	2	2	2	2	0.150299	0.432737	Homo sapiens ATP/GTP binding protein-like 5 (AGBL5), transcript variant 1, mRNA.
ILMN_1777182	AGC1	0.6875	0.783133	0.0419157	NA	66.798	1.97982	64.54	NA	1.03499	NA	0.0496107	2	2	2	2	2	2	0.742226	0.749296	Homo sapiens aggrecan 1 (chondroitin sulfate proteoglycan 1, large aggregating proteoglycan, antigen identified by monoclonal antibody A0122) (AGC1), transcript variant 1, mRNA.
ILMN_2257015	AGER	0.608434	0.287651	0.0279175	NA	68.1299	1.34493	75.7116	NA	0.899861	NA	-0.152226	2	2	2	2	2	2	0.309997	0.580161	Homo sapiens advanced glycosylation end product-specific receptor (AGER), transcript variant 1, mRNA.
ILMN_1729777	AGER	0.208584	0.061747	0.119413	NA	79.4949	6.71238	88.1275	NA	0.902044	NA	-0.14873	2	2	2	2	2	2	0.329201	0.593589	Homo sapiens advanced glycosylation end product-specific receptor (AGER), transcript variant 1, mRNA.
ILMN_1652023	AGFG2	0.250753	0.671687	0.0715563	NA	76.2303	3.85709	67.2713	NA	1.13318	NA	0.180373	2	2	2	2	2	2	0.244515	0.52978	Homo sapiens ArfGAP with FG repeats 2 (AGFG2), mRNA.
ILMN_1703228	AGFG2	0.00225904	0.0165663	0.0565898	NA	135.927	5.43912	100.966	NA	1.34626	NA	0.428959	2	2	2	2	2	2	0.0092261	0.090327	Homo sapiens ArfGAP with FG repeats 2 (AGFG2), mRNA.
ILMN_2064917	AGGF1	0	0	0.107099	NA	349.871	26.4959	282.982	NA	1.23637	NA	0.306112	2	2	2	2	2	2	0.0618633	0.276139	Homo sapiens angiogenic factor with G patch and FHA domains 1 (AGGF1), mRNA.
ILMN_1772645	AGK	0	0	0.0975432	NA	517.596	35.7004	498.3	NA	1.03872	NA	0.0548134	2	2	2	2	2	2	0.737536	0.747816	Homo sapiens acylglycerol kinase (AGK), mRNA.
ILMN_1680343	AGL	0.131024	0.063253	0.00713409	NA	80.1247	0.404194	87.8792	NA	0.911759	NA	-0.133275	2	2	2	2	2	2	0.372029	0.617052	Homo sapiens amylo-1, 6-glucosidase, 4-alpha-glucanotransferase (AGL), transcript variant 1, mRNA.
ILMN_1664006	AGL	0.00301205	0.0060241	0.109745	NA	125.785	9.76111	132.752	NA	0.94752	NA	-0.0777718	2	2	2	2	2	2	0.596349	0.709156	Homo sapiens amylo-1, 6-glucosidase, 4-alpha-glucanotransferase (AGL), transcript variant 1, mRNA.
ILMN_2277492	AGL	0.253765	0.245482	0.0154541	NA	75.2059	0.821827	76.5112	NA	0.98294	NA	-0.0248242	2	2	2	2	2	2	0.866227	0.777367	Homo sapiens amylo-1, 6-glucosidase, 4-alpha-glucanotransferase (AGL), transcript variant 6, mRNA.
ILMN_1717468	AGL	0.268072	0.343373	0.0834439	NA	75.8085	4.47299	74.0336	NA	1.02398	NA	0.034181	2	2	2	2	2	2	0.834684	0.771095	Homo sapiens amylo-1, 6-glucosidase, 4-alpha-glucanotransferase (AGL), transcript variant 4, mRNA.
ILMN_2274377	AGL	0.306476	0.433735	0.0755143	NA	74.6349	3.98525	71.7754	NA	1.03984	NA	0.05636	2	2	2	2	2	2	0.719485	0.743743	Homo sapiens amylo-1, 6-glucosidase, 4-alpha-glucanotransferase (AGL), transcript variant 5, mRNA.
ILMN_2371825	AGL	0	0	0.125197	NA	375.149	33.211	325.684	NA	1.15188	NA	0.203988	2	2	2	2	2	2	0.214566	0.50204	Homo sapiens amylo-1, 6-glucosidase, 4-alpha-glucanotransferase (AGL), transcript variant 5, mRNA.
ILMN_1707169	AGMAT	0.000753012	0	0.159905	NA	176.104	19.9121	243.706	NA	0.722606	NA	-0.468718	2	2	2	2	2	2	0.00750365	0.078938	Homo sapiens agmatine ureohydrolase (agmatinase) (AGMAT), mRNA.
ILMN_1697790	AGPAT1	0.286145	0.447289	0.0465305	NA	74.4904	2.45089	71.4885	NA	1.04199	NA	0.0593439	2	2	2	2	2	2	0.694746	0.738428	Homo sapiens 1-acylglycerol-3-phosphate O-acyltransferase 1 (lysophosphatidic acid acyltransferase, alpha) (AGPAT1), transcript variant 1, mRNA.
ILMN_1779109	AGPAT1	0.715361	0.981928	0.0802389	NA	65.7359	3.72969	56.281	NA	1.16799	NA	0.224032	2	2	2	2	2	2	0.154187	0.437387	Homo sapiens 1-acylglycerol-3-phosphate O-acyltransferase 1 (lysophosphatidic acid acyltransferase, alpha) (AGPAT1), transcript variant 2, mRNA.
ILMN_1679520	AGPAT1	0	0	0.155931	NA	629.031	69.357	487.477	NA	1.29038	NA	0.367797	2	2	2	2	2	2	0.0360257	0.204924	Homo sapiens 1-acylglycerol-3-phosphate O-acyltransferase 1 (lysophosphatidic acid acyltransferase, alpha) (AGPAT1), transcript variant 1, mRNA.
ILMN_2377430	AGPAT2	0	0	0.025151	NA	197.013	3.50376	260.979	NA	0.754898	NA	-0.405647	2	2	2	2	2	2	0.0120237	0.105182	Homo sapiens 1-acylglycerol-3-phosphate O-acyltransferase 2 (lysophosphatidic acid acyltransferase, beta) (AGPAT2), transcript variant 2, mRNA.
ILMN_1681081	AGPAT2	0	0	0.0951863	NA	257.618	17.3395	305.073	NA	0.844448	NA	-0.243919	2	2	2	2	2	2	0.117722	0.385954	Homo sapiens 1-acylglycerol-3-phosphate O-acyltransferase 2 (lysophosphatidic acid acyltransferase, beta) (AGPAT2), transcript variant 1, mRNA.
ILMN_1732176	AGPAT2	0	0	0.048137	NA	382.969	13.0355	405.115	NA	0.945334	NA	-0.0811034	2	2	2	2	2	2	0.583921	0.705689	Homo sapiens 1-acylglycerol-3-phosphate O-acyltransferase 2 (lysophosphatidic acid acyltransferase, beta) (AGPAT2), transcript variant 1, mRNA.
ILMN_1661373	AGPAT3	0.127259	0.0286145	0.0958882	NA	82.5985	5.60044	96.4675	NA	0.856231	NA	-0.223928	2	2	2	2	2	2	0.148556	0.4306	Homo sapiens 1-acylglycerol-3-phosphate O-acyltransferase 3 (AGPAT3), transcript variant 2, mRNA.
ILMN_2288175	AGPAT3	0.326807	0.0768072	0.0343532	NA	73.3733	1.78234	85.3421	NA	0.859756	NA	-0.218002	2	2	2	2	2	2	0.152237	0.434637	Homo sapiens 1-acylglycerol-3-phosphate O-acyltransferase 3 (AGPAT3), transcript variant 1, mRNA.
ILMN_1654010	AGPAT3	0.0783133	0.108434	0.0220698	NA	84.8491	1.32413	82.8347	NA	1.02432	NA	0.0346644	2	2	2	2	2	2	0.815825	0.766626	Homo sapiens 1-acylglycerol-3-phosphate O-acyltransferase 3 (AGPAT3), mRNA.
ILMN_1730504	AGPAT4	0	0	0.0315861	NA	280.175	6.25764	186.46	NA	1.5026	NA	0.587465	2	2	2	2	2	2	0.000750888	0.0169232	Homo sapiens 1-acylglycerol-3-phosphate O-acyltransferase 4 (lysophosphatidic acid acyltransferase, delta) (AGPAT4), mRNA.
ILMN_1662049	AGPAT5	0	0	0.0872149	NA	337.212	20.7959	252.945	NA	1.33315	NA	0.414834	2	2	2	2	2	2	0.0128552	0.109622	Homo sapiens 1-acylglycerol-3-phosphate O-acyltransferase 5 (lysophosphatidic acid acyltransferase, epsilon) (AGPAT5), mRNA.
ILMN_1740752	AGPAT6	0.0271084	0.0060241	0.0393023	NA	96.7069	2.68757	113.115	NA	0.854944	NA	-0.226098	2	2	2	2	2	2	0.13871	0.415703	Homo sapiens 1-acylglycerol-3-phosphate O-acyltransferase 6 (lysophosphatidic acid acyltransferase, zeta) (AGPAT6), mRNA.
ILMN_1794875	AGPAT9	0.0572289	0.0105422	0.0708554	NA	88.2458	4.42132	108.995	NA	0.809631	NA	-0.304664	2	2	2	2	2	2	0.0531377	0.254789	Homo sapiens 1-acylglycerol-3-phosphate O-acyltransferase 9 (AGPAT9), mRNA.
ILMN_1698209	AGPS	0	0	0.0606235	NA	955.705	40.9685	672.6	NA	1.42091	NA	0.506816	2	2	2	2	2	2	0.00289037	0.0419742	Homo sapiens alkylglycerone phosphate synthase (AGPS), mRNA.
ILMN_1814151	AGR2	0.0579819	0.174699	0.0805847	NA	88.2346	5.02778	78.9116	NA	1.11814	NA	0.161106	2	2	2	2	2	2	0.30129	0.574492	Homo sapiens anterior gradient homolog 2 (Xenopus laevis) (AGR2), mRNA.
ILMN_2050246	AGR3	0.271084	0.498494	0.0262763	NA	74.6837	1.38763	70.4345	NA	1.06033	NA	0.0845104	2	2	2	2	2	2	0.571014	0.700166	Homo sapiens anterior gradient homolog 3 (Xenopus laevis) (AGR3), mRNA.
ILMN_2234605	AGRN	0.0368976	0.39006	0.0765535	NA	93.2671	5.04869	72.7333	NA	1.28232	NA	0.358754	2	2	2	2	2	2	0.0272591	0.173397	Homo sapiens agrin (AGRN), mRNA.
ILMN_1770336	AGRP	0.589608	0.177711	0.0298468	NA	68.4545	1.44473	78.786	NA	0.868867	NA	-0.202793	2	2	2	2	2	2	0.181034	0.469756	Homo sapiens agouti related protein homolog (mouse) (AGRP), transcript variant 1, mRNA.
ILMN_1714253	AGRP	0.490964	0.649096	0.0647243	NA	70.3343	3.21899	67.7061	NA	1.03882	NA	0.0549428	2	2	2	2	2	2	0.722276	0.744509	Homo sapiens agouti related protein homolog (mouse) (AGRP), transcript variant 2, mRNA.
ILMN_1813530	AGT	0.619729	0.906627	0.0360402	NA	67.8342	1.72871	61.5234	NA	1.10258	NA	0.140877	2	2	2	2	2	2	0.349882	0.605828	Homo sapiens angiotensinogen (serpin peptidase inhibitor, clade A, member 8) (AGT), mRNA.
ILMN_2223922	AGTPBP1	0.731175	0.402108	0.0356323	NA	65.7807	1.6574	72.4201	NA	0.908321	NA	-0.138727	2	2	2	2	2	2	0.353949	0.607936	Homo sapiens ATP/GTP binding protein 1 (AGTPBP1), mRNA.
ILMN_2341343	AGTR1	0.347892	0.442771	0.19419	NA	78.2136	10.7398	71.6412	NA	1.09174	NA	0.126629	2	2	2	2	2	2	0.504637	0.677389	Homo sapiens angiotensin II receptor, type 1 (AGTR1), transcript variant 3, mRNA.
ILMN_1814327	AGTR1	0.65738	0.942771	0.0529532	NA	67.2188	2.51691	59.7333	NA	1.12532	NA	0.170329	2	2	2	2	2	2	0.264782	0.546095	Homo sapiens angiotensin II receptor, type 1 (AGTR1), transcript variant 1, mRNA.
ILMN_1775634	AGTR2	0.0436747	0.0150602	0.0519286	NA	91.3684	3.35496	105.207	NA	0.868459	NA	-0.20347	2	2	2	2	2	2	0.181206	0.469784	Homo sapiens angiotensin II receptor, type 2 (AGTR2), mRNA.
ILMN_1802458	AGTRAP	0	0	0.103919	NA	194.782	14.3129	281.901	NA	0.690957	NA	-0.533331	2	2	2	2	2	2	0.00220178	0.0349123	Homo sapiens angiotensin II receptor-associated protein (AGTRAP), transcript variant 4, mRNA.
ILMN_2307656	AGTRAP	0	0	0.010625	NA	199.81	1.50118	252.803	NA	0.790379	NA	-0.339383	2	2	2	2	2	2	0.0311821	0.187649	Homo sapiens angiotensin II receptor-associated protein (AGTRAP), transcript variant 2, mRNA.
ILMN_1709796	AGXT	0.630271	0.871988	0.0649606	NA	67.4843	3.09983	62.4149	NA	1.08122	NA	0.112662	2	2	2	2	2	2	0.462294	0.658831	Homo sapiens alanine-glyoxylate aminotransferase (AGXT), mRNA.
ILMN_1783963	AGXT2	0.777108	0.731928	0.0112134	NA	64.9699	0.515152	65.9514	NA	0.985117	NA	-0.0216328	2	2	2	2	2	2	0.88339	0.780522	Homo sapiens alanine-glyoxylate aminotransferase 2 (AGXT2), nuclear gene encoding mitochondrial protein, mRNA.
ILMN_2134801	AGXT2L1	0.228163	0.771084	0.105777	NA	77.9216	5.82822	64.8955	NA	1.20072	NA	0.263905	2	2	2	2	2	2	0.103658	0.36228	Homo sapiens alanine-glyoxylate aminotransferase 2-like 1 (AGXT2L1), mRNA.
ILMN_1673529	AGXT2L2	0.000753012	0.00301205	0.0734245	NA	143.683	7.45985	145.527	NA	0.987325	NA	-0.018403	2	2	2	2	2	2	0.892647	0.78206	Homo sapiens alanine-glyoxylate aminotransferase 2-like 2 (AGXT2L2), mRNA.
ILMN_1686370	AGXT2L2	0.0384036	0.108434	0.121861	NA	94.1783	8.11523	82.737	NA	1.13829	NA	0.186862	2	2	2	2	2	2	0.253141	0.537445	Homo sapiens alanine-glyoxylate aminotransferase 2-like 2 (AGXT2L2), mRNA.
ILMN_1809139	AHCTF1	0	0	0.261958	NA	310.397	57.4957	382.997	NA	0.810442	NA	-0.303219	2	2	2	2	2	2	0.0858918	0.329569	Homo sapiens AT hook containing transcription factor 1 (AHCTF1), mRNA.
ILMN_1747504	AHCTF1	0	0	0.0720364	NA	467.303	23.8032	434.777	NA	1.07481	NA	0.104083	2	2	2	2	2	2	0.500101	0.675386	Homo sapiens AT hook containing transcription factor 1 (AHCTF1), mRNA.
ILMN_1657862	AHCY	0	0	0.0696873	NA	7419.71	365.616	7605.94	NA	0.975516	NA	-0.0357624	2	2	2	2	2	2	0.803246	0.762988	Homo sapiens S-adenosylhomocysteine hydrolase (AHCY), mRNA.
ILMN_1770412	AHCYL1	0	0	0.040219	NA	2153.16	61.234	1995.97	NA	1.07875	NA	0.109367	2	2	2	2	2	2	0.467361	0.661409	Homo sapiens adenosylhomocysteinase-like 1 (AHCYL1), mRNA.
ILMN_1712786	AHCYL2	0	0	0.0355967	NA	232.75	5.85848	310.118	NA	0.750522	NA	-0.414033	2	2	2	2	2	2	0.010737	0.0987763	Homo sapiens S-adenosylhomocysteine hydrolase-like 2 (AHCYL2), mRNA.
ILMN_1680111	AHDC1	0.0105422	0.0165663	0.106595	NA	107.679	8.11616	100.88	NA	1.0674	NA	0.0941023	2	2	2	2	2	2	0.56101	0.697849	Homo sapiens AT hook, DNA binding motif, containing 1 (AHDC1), mRNA.
ILMN_1791006	AHI1	0	0.0060241	0.062589	NA	159.742	7.06974	133.762	NA	1.19423	NA	0.256082	2	2	2	2	2	2	0.101525	0.358921	Homo sapiens Abelson helper integration site 1 (AHI1), mRNA.
ILMN_1752159	AHNAK	0.0805723	0.0436747	0.0186929	NA	84.6215	1.11852	91.4737	NA	0.925091	NA	-0.112333	2	2	2	2	2	2	0.450487	0.653358	Homo sapiens AHNAK nucleoprotein (AHNAK), transcript variant 2, mRNA.
ILMN_1792495	AHNAK	0.186747	0.325301	0.0321204	NA	77.5878	1.76222	74.4908	NA	1.04158	NA	0.0587679	2	2	2	2	2	2	0.694312	0.738299	Homo sapiens AHNAK nucleoprotein (AHNAK), transcript variant 1, mRNA.
ILMN_1714567	AHNAK	0.000753012	0.0406627	0.121625	NA	171.487	14.7481	92.1439	NA	1.86108	NA	0.896139	2	2	2	2	2	2	1.44615e-05	0.000978908	Homo sapiens AHNAK nucleoprotein (AHNAK), transcript variant 1, mRNA.
ILMN_2162799	AHR	0.42244	0.0768072	0.0200549	NA	71.3969	1.01248	85.3618	NA	0.836403	NA	-0.257729	2	2	2	2	2	2	0.0934413	0.343842	Homo sapiens aryl hydrocarbon receptor (AHR), mRNA.
ILMN_1782679	AHRR	0.417922	0.777108	0.0586128	NA	71.7205	2.97249	64.6497	NA	1.10937	NA	0.149741	2	2	2	2	2	2	0.327332	0.592837	Homo sapiens aryl-hydrocarbon receptor repressor (AHRR), mRNA.
ILMN_1703617	AHSA1	0	0	0.0717327	NA	940.58	47.7087	1101.72	NA	0.853737	NA	-0.228137	2	2	2	2	2	2	0.138357	0.415452	Homo sapiens AHA1, activator of heat shock 90kDa protein ATPase homolog 1 (yeast) (AHSA1), mRNA.
ILMN_1798308	AHSA2	0.0293675	0.0060241	0.143849	NA	99.9205	10.1636	121.865	NA	0.819926	NA	-0.286435	2	2	2	2	2	2	0.0769243	0.309118	Homo sapiens AHA1, activator of heat shock 90kDa protein ATPase homolog 2 (yeast) (AHSA2), mRNA.
ILMN_1730625	AHSG	0.419428	0.0105422	0.284795	NA	80.4334	16.1977	110.656	NA	0.72688	NA	-0.46021	2	2	2	2	2	2	0.016933	0.13078	Homo sapiens alpha-2-HS-glycoprotein (AHSG), mRNA.
ILMN_1696512	AHSP	0.320783	0.453313	0.0823428	NA	74.4163	4.3329	71.3814	NA	1.04252	NA	0.0600692	2	2	2	2	2	2	0.704319	0.741133	Homo sapiens alpha hemoglobin stabilizing protein (AHSP), mRNA.
ILMN_2164164	AICDA	0.15738	0.143072	0.0104164	NA	78.9154	0.58125	80.323	NA	0.982475	NA	-0.0255067	2	2	2	2	2	2	0.862782	0.776528	Homo sapiens activation-induced cytidine deaminase (AICDA), mRNA.
ILMN_1703538	AIF1	0.8125	0.141566	0.037222	NA	63.9521	1.68322	80.5707	NA	0.793739	NA	-0.333264	2	2	2	2	2	2	0.0345477	0.200171	Homo sapiens allograft inflammatory factor 1 (AIF1), transcript variant 3, mRNA.
ILMN_1792473	AIF1	0.207078	0.13253	0.0415144	NA	77.2007	2.26624	80.9903	NA	0.953209	NA	-0.0691348	2	2	2	2	2	2	0.639917	0.722769	Homo sapiens allograft inflammatory factor 1 (AIF1), transcript variant 1, mRNA.
ILMN_1771827	AIF1	0.625	0.90512	0.051226	NA	67.779	2.45511	61.5753	NA	1.10075	NA	0.138488	2	2	2	2	2	2	0.361973	0.611814	Homo sapiens allograft inflammatory factor 1 (AIF1), transcript variant 2, mRNA.
ILMN_1770725	AIF1L	0	0	0.0180922	NA	327.874	4.19455	435.127	NA	0.753514	NA	-0.408295	2	2	2	2	2	2	0.0114956	0.102666	Homo sapiens allograft inflammatory factor 1-like (AIF1L), transcript variant 1, mRNA.
ILMN_1667183	AIFM1	0.315512	0.200301	0.190607	NA	79.2085	10.6757	77.945	NA	1.01621	NA	0.0231997	2	2	2	2	2	2	0.952506	0.792687	Homo sapiens apoptosis-inducing factor, mitochondrion-associated, 1 (AIFM1), nuclear gene encoding mitochondrial protein, transcript variant 2, mRNA.
ILMN_1668408	AIFM1	0	0	0.0120644	NA	716.954	6.11622	700.923	NA	1.02287	NA	0.0326248	2	2	2	2	2	2	0.825649	0.768865	Homo sapiens apoptosis-inducing factor, mitochondrion-associated, 1 (AIFM1), nuclear gene encoding mitochondrial protein, transcript variant 3, mRNA.
ILMN_2313821	AIFM1	0	0	0.0731248	NA	2069.82	107.025	1989.3	NA	1.04048	NA	0.0572501	2	2	2	2	2	2	0.714108	0.742906	Homo sapiens apoptosis-inducing factor, mitochondrion-associated, 1 (AIFM1), nuclear gene encoding mitochondrial protein, transcript variant 3, mRNA.
ILMN_1717357	AIFM1	0	0	0.00206141	NA	391.278	0.57034	362.282	NA	1.08004	NA	0.111081	2	2	2	2	2	2	0.455383	0.654988	Homo sapiens apoptosis-inducing factor, mitochondrion-associated, 1 (AIFM1), nuclear gene encoding mitochondrial protein, transcript variant 1, mRNA.
ILMN_1712639	AIFM2	0.0685241	0.0527108	0.0785001	NA	86.5015	4.80152	89.3652	NA	0.967955	NA	-0.0469884	2	2	2	2	2	2	0.745142	0.749902	Homo sapiens apoptosis-inducing factor, mitochondrion-associated, 2 (AIFM2), nuclear gene encoding mitochondrial protein, mRNA.
ILMN_1704173	AIFM3	0.0783132	0.0150602	0.16295	NA	90.0964	10.3812	104.24	NA	0.864318	NA	-0.210365	2	2	2	2	2	2	0.18575	0.474719	Homo sapiens apoptosis-inducing factor, mitochondrion-associated, 3 (AIFM3), nuclear gene encoding mitochondrial protein, transcript variant 2, mRNA.
ILMN_1797974	AIG1	0	0	0.11925	NA	232.516	19.6063	257.851	NA	0.901748	NA	-0.149204	2	2	2	2	2	2	0.327731	0.593162	Homo sapiens androgen-induced 1 (AIG1), mRNA.
ILMN_1688625	AIM1	0.00753012	0.0195783	0.119734	NA	111.427	9.43397	99.2336	NA	1.12288	NA	0.167203	2	2	2	2	2	2	0.305106	0.577178	Homo sapiens absent in melanoma 1 (AIM1), mRNA.
ILMN_1669557	AIM1L	0.381777	0.432229	0.0635434	NA	72.5512	3.25986	71.8178	NA	1.01021	NA	0.0146567	2	2	2	2	2	2	0.929884	0.787464	Homo sapiens absent in melanoma 1-like (AIM1L), mRNA.
ILMN_2113340	AIM1L	0.362952	0.587349	0.06128	NA	73.2356	3.17341	68.838	NA	1.06388	NA	0.0893413	2	2	2	2	2	2	0.55886	0.69701	Homo sapiens absent in melanoma 1-like (AIM1L), mRNA.
ILMN_1776916	AIM1L	0.51506	0.826807	0.0929399	NA	69.9076	4.59422	63.6949	NA	1.09754	NA	0.134272	2	2	2	2	2	2	0.394682	0.629741	Homo sapiens absent in melanoma 1-like (AIM1L), mRNA.
ILMN_2214232	AIM2	0.393825	0.21988	0.0757276	NA	72.8322	3.89998	77.4744	NA	0.940082	NA	-0.089142	2	2	2	2	2	2	0.547626	0.693186	Homo sapiens absent in melanoma 2 (AIM2), mRNA.
ILMN_1673252	AIMP2	0	0	0.07508	NA	2257.14	119.83	1844.46	NA	1.22374	NA	0.291296	2	2	2	2	2	2	0.0671266	0.28827	Homo sapiens aminoacyl tRNA synthetase complex-interacting multifunctional protein 2 (AIMP2), mRNA.
ILMN_2103841	AIP	0	0	0.017715	NA	684.25	8.57118	599.676	NA	1.14103	NA	0.19034	2	2	2	2	2	2	0.208019	0.497134	Homo sapiens aryl hydrocarbon receptor interacting protein (AIP), mRNA.
ILMN_2368268	AIPL1	0.371988	0.182229	0.0536459	NA	72.7916	2.76123	78.5197	NA	0.927049	NA	-0.109283	2	2	2	2	2	2	0.463305	0.659423	Homo sapiens aryl hydrocarbon receptor interacting protein-like 1 (AIPL1), transcript variant 1, mRNA.
ILMN_2415292	AIPL1	0.323795	0.338855	0.0844885	NA	74.388	4.44412	74.2628	NA	1.00168	NA	0.00242879	2	2	2	2	2	2	0.999209	0.800302	Homo sapiens aryl hydrocarbon receptor interacting protein-like 1 (AIPL1), transcript variant 2, mRNA.
ILMN_2261519	AIRE	0	0	0.0693069	NA	492.839	24.1527	610.043	NA	0.807877	NA	-0.307793	2	2	2	2	2	2	0.0508617	0.249151	Homo sapiens autoimmune regulator (autoimmune polyendocrinopathy candidiasis ectodermal dystrophy) (AIRE), transcript variant AIRE-1, mRNA.
ILMN_1670282	AIRE	0.246235	0.0527108	0.0937907	NA	76.8123	5.09419	89.3477	NA	0.859701	NA	-0.218094	2	2	2	2	2	2	0.158368	0.442991	Homo sapiens autoimmune regulator (AIRE), transcript variant AIRE-2, mRNA.
ILMN_1723521	AJAP1	0.180723	0.0210843	0.0919407	NA	79.5325	5.17056	99.1787	NA	0.801911	NA	-0.318486	2	2	2	2	2	2	0.0459014	0.235201	Homo sapiens adherens junctions associated protein 1 (AJAP1), transcript variant 1, mRNA.
ILMN_2312764	AJAP1	0.0278614	0.0060241	0.155547	NA	101.123	11.1224	117.862	NA	0.857981	NA	-0.220982	2	2	2	2	2	2	0.164742	0.451273	Homo sapiens adherens junctions associated protein 1 (AJAP1), transcript variant 2, mRNA.
ILMN_2242299	AJAP1	0.511295	0.304217	0.23366	NA	71.7273	11.851	75.3395	NA	0.952055	NA	-0.0708826	2	2	2	2	2	2	0.608549	0.713746	Homo sapiens adherens junctions associated protein 1 (AJAP1), transcript variant 2, mRNA.
ILMN_1779965	AK1	0.0256024	0.0150602	0.0685801	NA	96.8329	4.69576	103.209	NA	0.938221	NA	-0.092001	2	2	2	2	2	2	0.535315	0.688575	Homo sapiens adenylate kinase 1 (AK1), mRNA.
ILMN_1716053	AK2	0	0	0.0371376	NA	3627.65	95.2628	3178.33	NA	1.14137	NA	0.190766	2	2	2	2	2	2	0.209721	0.498413	Homo sapiens adenylate kinase 2 (AK2), transcript variant AK2A, mRNA.
ILMN_1670542	AK2	0	0	0.00658949	NA	417.581	1.94571	365.167	NA	1.14353	NA	0.193499	2	2	2	2	2	2	0.200212	0.49013	Homo sapiens adenylate kinase 2 (AK2), transcript variant AK2A, mRNA.
ILMN_1655645	AK2	0	0	0.117339	NA	335.069	27.801	238.242	NA	1.40642	NA	0.492029	2	2	2	2	2	2	0.0050061	0.0600311	Homo sapiens adenylate kinase 2 (AK2), transcript variant AK2B, mRNA.
ILMN_1778173	AK3	0	0	0.0190179	NA	653.22	8.78431	667.047	NA	0.979271	NA	-0.0302196	2	2	2	2	2	2	0.837492	0.771315	Homo sapiens adenylate kinase 3 (AK3), nuclear gene encoding mitochondrial protein, mRNA.
ILMN_2338038	AK3L1	0	0	0.0633564	NA	722.684	32.3761	1464.07	NA	0.493614	NA	-1.01854	2	2	2	2	2	2	1.46657e-06	0.000205636	Homo sapiens adenylate kinase 3-like 1 (AK3L1), nuclear gene encoding mitochondrial protein, transcript variant 6, mRNA.
ILMN_1686522	AK3L1	0.0805723	0.0768072	0.0146924	NA	84.8172	0.881174	85.394	NA	0.993245	NA	-0.00977878	2	2	2	2	2	2	0.946835	0.791198	Homo sapiens adenylate kinase 3-like 1 (AK3L1), nuclear gene encoding mitochondrial protein, transcript variant 7, mRNA.
ILMN_1656593	AK5	0.446536	0.240964	0.221765	NA	75.5989	11.8548	76.6799	NA	0.985903	NA	-0.0204819	2	2	2	2	2	2	0.825307	0.768729	Homo sapiens adenylate kinase 5 (AK5), transcript variant 1, mRNA.
ILMN_2387712	AK5	0.880271	0.947289	0.0655719	NA	61.4929	2.8512	59.4897	NA	1.03367	NA	0.0477814	2	2	2	2	2	2	0.758448	0.753243	Homo sapiens adenylate kinase 5 (AK5), transcript variant 2, mRNA.
ILMN_2283473	AK5	0.896837	0.963855	0.0792988	NA	60.5553	3.3955	58.032	NA	1.04348	NA	0.0614052	2	2	2	2	2	2	0.696435	0.738703	Homo sapiens adenylate kinase 5 (AK5), transcript variant 2, mRNA.
ILMN_1684305	AK7	0.336596	0.168675	0.00642943	NA	72.9475	0.331641	79.0004	NA	0.923382	NA	-0.115001	2	2	2	2	2	2	0.439876	0.648842	Homo sapiens adenylate kinase 7 (AK7), mRNA.
ILMN_1712530	AKAP1	0.208584	0.0406627	0.171211	NA	81.783	9.90099	91.8952	NA	0.889959	NA	-0.168189	2	2	2	2	2	2	0.282473	0.560725	Homo sapiens A kinase (PRKA) anchor protein 1 (AKAP1), nuclear gene encoding mitochondrial protein, mRNA.
ILMN_1718808	AKAP10	0.000753012	0	0.0571202	NA	159.099	6.426	170.039	NA	0.935661	NA	-0.0959414	2	2	2	2	2	2	0.518434	0.682442	Homo sapiens A kinase (PRKA) anchor protein 10 (AKAP10), nuclear gene encoding mitochondrial protein, mRNA.
ILMN_2280189	AKAP11	0.158133	0.39006	0.0365451	NA	79.1341	2.04493	72.6916	NA	1.08863	NA	0.122511	2	2	2	2	2	2	0.415267	0.639256	Homo sapiens A kinase (PRKA) anchor protein 11 (AKAP11), transcript variant 2, mRNA.
ILMN_1783818	AKAP11	0.849398	0.99247	0.120957	NA	61.1333	5.22868	53.6089	NA	1.14036	NA	0.189485	2	2	2	2	2	2	0.246033	0.530909	Homo sapiens A kinase (PRKA) anchor protein 11 (AKAP11), mRNA.
ILMN_2293758	AKAP11	0.00225904	0.0060241	0.120509	NA	132.722	11.3096	112.572	NA	1.179	NA	0.237558	2	2	2	2	2	2	0.147459	0.429282	Homo sapiens A kinase (PRKA) anchor protein 11 (AKAP11), mRNA.
ILMN_1686846	AKAP12	0.298946	0.00903614	0.270542	NA	84.8951	16.2406	111.641	NA	0.76043	NA	-0.395112	2	2	2	2	2	2	0.03295	0.194648	Homo sapiens A kinase (PRKA) anchor protein (gravin) 12 (AKAP12), transcript variant 2, mRNA.
ILMN_1715532	AKAP12	0.0941265	0.433735	0.0864696	NA	84.5264	5.16822	71.7724	NA	1.1777	NA	0.235973	2	2	2	2	2	2	0.136332	0.412615	Homo sapiens A kinase (PRKA) anchor protein (gravin) 12 (AKAP12), transcript variant 1, mRNA.
ILMN_2308950	AKAP12	0.0218373	0.108434	0.119347	NA	99.9048	8.43111	82.9378	NA	1.20458	NA	0.268526	2	2	2	2	2	2	0.102848	0.361167	Homo sapiens A kinase (PRKA) anchor protein (gravin) 12 (AKAP12), transcript variant 1, mRNA.
ILMN_2396956	AKAP13	0	0	0.0418338	NA	281.42	8.32468	322.368	NA	0.872978	NA	-0.195982	2	2	2	2	2	2	0.196154	0.486303	Homo sapiens A kinase (PRKA) anchor protein 13 (AKAP13), transcript variant 2, mRNA.
ILMN_1752247	AKAP13	0.17997	0.0707831	0.0357358	NA	78.0124	1.97129	86.0171	NA	0.90694	NA	-0.140921	2	2	2	2	2	2	0.346593	0.603754	Homo sapiens A kinase (PRKA) anchor protein 13 (AKAP13), transcript variant 1, mRNA.
ILMN_1802537	AKAP14	0.610693	0.180723	0.112174	NA	67.7681	5.37532	78.6398	NA	0.861754	NA	-0.214652	2	2	2	2	2	2	0.167581	0.454337	Homo sapiens A kinase (PRKA) anchor protein 14 (AKAP14), transcript variant 1, mRNA.
ILMN_1679987	AKAP14	0.5625	0.512048	0.0900104	NA	69.1026	4.39817	70.252	NA	0.983639	NA	-0.0237997	2	2	2	2	2	2	0.860729	0.77576	Homo sapiens A kinase (PRKA) anchor protein 14 (AKAP14), transcript variant 1, mRNA.
ILMN_1673542	AKAP14	0.268825	0.730422	0.00230826	NA	74.6067	0.121772	66.004	NA	1.13034	NA	0.176752	2	2	2	2	2	2	0.24018	0.526046	Homo sapiens A kinase (PRKA) anchor protein 14 (AKAP14), transcript variant 3, mRNA.
ILMN_1737754	AKAP2	0.447289	0.73494	0.0602057	NA	71.3205	3.03625	65.9143	NA	1.08202	NA	0.113726	2	2	2	2	2	2	0.456236	0.655711	Homo sapiens A kinase (PRKA) anchor protein 2 (AKAP2), transcript variant 1, mRNA.
ILMN_1808905	AKAP3	0.0361446	0.0677711	0.12425	NA	95.3738	8.37936	86.9221	NA	1.09723	NA	0.13387	2	2	2	2	2	2	0.416109	0.639399	Homo sapiens A kinase (PRKA) anchor protein 3 (AKAP3), mRNA.
ILMN_1734794	AKAP4	0.127259	0.0677711	0.0417738	NA	80.6405	2.382	86.861	NA	0.928385	NA	-0.107204	2	2	2	2	2	2	0.471414	0.663023	Homo sapiens A kinase (PRKA) anchor protein 4 (AKAP4), transcript variant 2, mRNA.
ILMN_2268556	AKAP4	0.112952	0.108434	0.0538851	NA	82.4495	3.14153	82.9201	NA	0.994325	NA	-0.00821006	2	2	2	2	2	2	0.950572	0.792433	Homo sapiens A kinase (PRKA) anchor protein 4 (AKAP4), transcript variant 1, mRNA.
ILMN_2253207	AKAP4	0.251506	0.460843	0.0719527	NA	76.1379	3.87376	71.2644	NA	1.06839	NA	0.0954319	2	2	2	2	2	2	0.536625	0.689267	Homo sapiens A kinase (PRKA) anchor protein 4 (AKAP4), transcript variant 2, mRNA.
ILMN_1690818	AKAP5	0.948795	0.427711	0.0104149	NA	59.4854	0.438076	71.9006	NA	0.827329	NA	-0.273467	2	2	2	2	2	2	0.0762122	0.307515	Homo sapiens A kinase (PRKA) anchor protein 5 (AKAP5), mRNA.
ILMN_1770758	AKAP6	0.767319	0.876506	0.0422567	NA	65.0731	1.94438	62.3108	NA	1.04433	NA	0.0625783	2	2	2	2	2	2	0.677766	0.734173	Homo sapiens A kinase (PRKA) anchor protein 6 (AKAP6), mRNA.
ILMN_1733690	AKAP7	0	0	0.0370102	NA	503.055	13.1651	801.376	NA	0.62774	NA	-0.671761	2	2	2	2	2	2	0.000203284	0.00684048	Homo sapiens A kinase (PRKA) anchor protein 7 (AKAP7), transcript variant alpha, mRNA.
ILMN_1703049	AKAP7	0.580572	0.364458	0.119886	NA	68.4877	5.80585	73.4077	NA	0.932977	NA	-0.100087	2	2	2	2	2	2	0.50167	0.676032	Homo sapiens A kinase (PRKA) anchor protein 7 (AKAP7), transcript variant gamma, mRNA.
ILMN_2293529	AKAP7	0.773343	0.623494	0.0140156	NA	64.9634	0.643823	68.1933	NA	0.952636	NA	-0.0700027	2	2	2	2	2	2	0.636434	0.72174	Homo sapiens A kinase (PRKA) anchor protein 7 (AKAP7), transcript variant beta, mRNA.
ILMN_2410406	AKAP7	0.0542169	0.0406627	0.111265	NA	89.855	7.06944	91.9225	NA	0.977508	NA	-0.0328196	2	2	2	2	2	2	0.809572	0.764686	Homo sapiens A kinase (PRKA) anchor protein 7 (AKAP7), transcript variant alpha, mRNA.
ILMN_1741572	AKAP8	0	0	0.0676782	NA	367.267	17.5758	369.099	NA	0.995037	NA	-0.00717836	2	2	2	2	2	2	0.953141	0.792987	Homo sapiens A kinase (PRKA) anchor protein 8 (AKAP8), mRNA.
ILMN_1768962	AKAP8L	0	0	0.0358678	NA	415.39	10.5353	444.359	NA	0.934807	NA	-0.0972593	2	2	2	2	2	2	0.512719	0.680086	Homo sapiens A kinase (PRKA) anchor protein 8-like (AKAP8L), mRNA.
ILMN_2396691	AKAP9	0.0459337	0.00451807	0.0199603	NA	89.9169	1.26909	137.942	NA	0.651845	NA	-0.617399	2	2	2	2	2	2	0.000457255	0.012	Homo sapiens A kinase (PRKA) anchor protein (yotiao) 9 (AKAP9), transcript variant 4, mRNA.
ILMN_2400663	AKAP9	0.482681	0.445783	0.0752728	NA	70.5176	3.75336	71.553	NA	0.98553	NA	-0.0210287	2	2	2	2	2	2	0.878508	0.780367	Homo sapiens A kinase (PRKA) anchor protein (yotiao) 9 (AKAP9), transcript variant 3, mRNA.
ILMN_1802799	AKIRIN1	0	0	0.0539185	NA	1097.62	41.8481	3425.91	NA	0.32039	NA	-1.6421	2	2	2	2	2	2	9.43858e-10	8.82293e-07	Homo sapiens akirin 1 (AKIRIN1), mRNA.
ILMN_1658337	AKIRIN1	0	0	0.0144291	NA	1311.79	13.3841	3772.56	NA	0.347719	NA	-1.52401	2	2	2	2	2	2	2.73089e-09	1.7825e-06	Homo sapiens akirin 1 (AKIRIN1), mRNA.
ILMN_1679383	AKIRIN1	0.000753012	0	0.14489	NA	153.429	15.7192	319.299	NA	0.480517	NA	-1.05734	2	2	2	2	2	2	1.86622e-06	0.000245868	Homo sapiens akirin 1 (AKIRIN1), mRNA.
ILMN_2148847	AKIRIN2	0	0	0.132842	NA	1913.53	179.745	1763.93	NA	1.08482	NA	0.117451	2	2	2	2	2	2	0.483776	0.668881	Homo sapiens akirin 2 (AKIRIN2), mRNA.
ILMN_1770673	AKNA	0	0.00301205	0.190007	NA	292.341	39.2776	143.772	NA	2.03336	NA	1.02386	2	2	2	2	2	2	7.13603e-06	0.000616044	Homo sapiens AT-hook transcription factor (AKNA), mRNA.
ILMN_2205785	AKNAD1	0.300452	0.575301	0.143172	NA	77.2432	7.81997	69.1403	NA	1.1172	NA	0.159882	2	2	2	2	2	2	0.343818	0.601835	Homo sapiens AKNA domain containing 1 (AKNAD1), mRNA.
ILMN_1774938	AKR1A1	0.381777	0.0707831	0.061513	NA	72.484	3.15278	86.0039	NA	0.842799	NA	-0.24674	2	2	2	2	2	2	0.109847	0.372356	Homo sapiens aldo-keto reductase family 1, member A1 (aldehyde reductase) (AKR1A1), transcript variant 1, mRNA.
ILMN_2380771	AKR1A1	0	0	0.0649378	NA	2831.85	130.033	3100.84	NA	0.913252	NA	-0.130915	2	2	2	2	2	2	0.382494	0.623051	Homo sapiens aldo-keto reductase family 1, member A1 (aldehyde reductase) (AKR1A1), transcript variant 2, mRNA.
ILMN_1728047	AKR1A1	0	0	0.0399672	NA	4205.43	118.85	3632.61	NA	1.15769	NA	0.211247	2	2	2	2	2	2	0.167185	0.453862	Homo sapiens aldo-keto reductase family 1, member A1 (aldehyde reductase) (AKR1A1), transcript variant 1, mRNA.
ILMN_1701731	AKR1B1	0	0	0.00111286	NA	2938.65	2.31245	2410.5	NA	1.2191	NA	0.285817	2	2	2	2	2	2	0.0647744	0.282859	Homo sapiens aldo-keto reductase family 1, member B1 (aldose reductase) (AKR1B1), mRNA.
ILMN_1672148	AKR1B10	0.784639	0.528614	0.0442315	NA	64.6936	2.02338	69.9601	NA	0.924721	NA	-0.112909	2	2	2	2	2	2	0.448687	0.652963	Homo sapiens aldo-keto reductase family 1, member B10 (aldose reductase) (AKR1B10), mRNA.
ILMN_2278335	AKR1B15	0.358434	0.447289	0.00497971	NA	72.5055	0.255305	71.4525	NA	1.01474	NA	0.021105	2	2	2	2	2	2	0.886454	0.781214	Homo sapiens aldo-keto reductase family 1, member B15 (AKR1B15), mRNA.
ILMN_1662507	AKR1C1	0.521837	0.987952	0.129872	NA	70.2435	6.45069	55.2763	NA	1.27077	NA	0.345704	2	2	2	2	2	2	0.0412653	0.221992	Homo sapiens aldo-keto reductase family 1, member C1 (dihydrodiol dehydrogenase 1; 20-alpha (3-alpha)-hydroxysteroid dehydrogenase) (AKR1C1), mRNA.
ILMN_2412336	AKR1C2	0.746988	0.295181	0.0104453	NA	65.6727	0.485057	75.5901	NA	0.868801	NA	-0.202902	2	2	2	2	2	2	0.180129	0.469294	Homo sapiens aldo-keto reductase family 1, member C2 (dihydrodiol dehydrogenase 2; bile acid binding protein; 3-alpha hydroxysteroid dehydrogenase, type III) (AKR1C2), transcript variant 1, mRNA. XM_943424 XM_943425 XM_943427
ILMN_1713124	AKR1C3	0.207078	0.353916	0.137896	NA	80.1496	7.81517	73.6003	NA	1.08898	NA	0.122983	2	2	2	2	2	2	0.466522	0.66119	Homo sapiens aldo-keto reductase family 1, member C3 (3-alpha hydroxysteroid dehydrogenase, type II) (AKR1C3), mRNA.
ILMN_1668880	AKR1C4	0.420181	0.251506	0.109379	NA	72.8592	5.6351	76.3938	NA	0.953732	NA	-0.0683446	2	2	2	2	2	2	0.638932	0.722401	Homo sapiens aldo-keto reductase family 1, member C4 (chlordecone reductase; 3-alpha hydroxysteroid dehydrogenase, type I; dihydrodiol dehydrogenase 4) (AKR1C4), mRNA.
ILMN_1685803	AKR1CL1	0.669428	0.737952	0.0490333	NA	66.8262	2.31698	65.7888	NA	1.01577	NA	0.0225717	2	2	2	2	2	2	0.884265	0.78057	Homo sapiens aldo-keto reductase family 1, member C-like 1 (AKR1CL1), mRNA.
ILMN_2157277	AKR1D1	0	0	0.0167323	NA	2244	26.55	3143.81	NA	0.713783	NA	-0.486443	2	2	2	2	2	2	0.00350137	0.0470306	Homo sapiens aldo-keto reductase family 1, member D1 (delta 4-3-ketosteroid-5-beta-reductase) (AKR1D1), mRNA.
ILMN_1694985	AKR1E2	0.225151	0.135542	0.0603198	NA	76.5879	3.26667	80.9498	NA	0.946115	NA	-0.0799128	2	2	2	2	2	2	0.589036	0.707413	Homo sapiens aldo-keto reductase family 1, member E2 (AKR1E2), mRNA.
ILMN_1677043	AKR7A2	0	0	0.0182242	NA	1124.47	14.4904	2114.73	NA	0.531732	NA	-0.911229	2	2	2	2	2	2	5.48931e-06	0.000515581	Homo sapiens aldo-keto reductase family 7, member A2 (aflatoxin aldehyde reductase) (AKR7A2), mRNA.
ILMN_2145396	AKR7A3	0	0	0.0179474	NA	194.826	2.47248	313.615	NA	0.621225	NA	-0.686813	2	2	2	2	2	2	0.0001554	0.00569128	Homo sapiens aldo-keto reductase family 7, member A3 (aflatoxin aldehyde reductase) (AKR7A3), mRNA.
ILMN_1748661	AKT1	0.123494	0.063253	0.00777007	NA	80.5622	0.442631	87.9054	NA	0.916465	NA	-0.125849	2	2	2	2	2	2	0.398721	0.631743	Homo sapiens v-akt murine thymoma viral oncogene homolog 1 (AKT1), transcript variant 1, mRNA.
ILMN_2388507	AKT1	0	0	0.00246954	NA	1201.31	2.09775	926.894	NA	1.29606	NA	0.374127	2	2	2	2	2	2	0.0189188	0.139515	Homo sapiens v-akt murine thymoma viral oncogene homolog 1 (AKT1), transcript variant 2, mRNA.
ILMN_2410909	AKT1	0	0	0.26395	NA	1425.64	266.082	990.74	NA	1.43896	NA	0.52503	2	2	2	2	2	2	0.0128223	0.109484	Homo sapiens v-akt murine thymoma viral oncogene homolog 1 (AKT1), transcript variant 3, mRNA.
ILMN_1726906	AKT1S1	0.00677711	0.0165663	0.233948	NA	120.929	20.0049	100.307	NA	1.20559	NA	0.269743	2	2	2	2	2	2	0.168736	0.455554	Homo sapiens AKT1 substrate 1 (proline-rich) (AKT1S1), mRNA.
ILMN_1743347	AKT2	0.0135542	0.212349	0.0414691	NA	101.443	2.97463	77.7543	NA	1.30466	NA	0.383679	2	2	2	2	2	2	0.01723	0.131966	Homo sapiens v-akt murine thymoma viral oncogene homolog 2 (AKT2), mRNA.
ILMN_1757130	AKT3	0.222139	0.0677711	0.133797	NA	79.5003	7.52144	87.0073	NA	0.91372	NA	-0.130176	2	2	2	2	2	2	0.390865	0.627984	Homo sapiens v-akt murine thymoma viral oncogene homolog 3 (protein kinase B, gamma) (AKT3), transcript variant 1, mRNA.
ILMN_1733598	AKT3	0.335843	0.475904	0.0760343	NA	73.8772	3.97196	70.9174	NA	1.04174	NA	0.0589902	2	2	2	2	2	2	0.706783	0.741594	Homo sapiens v-akt murine thymoma viral oncogene homolog 3 (protein kinase B, gamma) (AKT3), transcript variant 2, mRNA.
ILMN_2325610	AKT3	0.167169	0.737952	0.0700725	NA	79.2066	3.92459	65.7747	NA	1.20421	NA	0.268088	2	2	2	2	2	2	0.0889438	0.335961	Homo sapiens v-akt murine thymoma viral oncogene homolog 3 (protein kinase B, gamma) (AKT3), transcript variant 2, mRNA.
ILMN_1665982	AKTIP	0.233434	0.0165663	0.0266631	NA	75.8823	1.43066	100.595	NA	0.754333	NA	-0.406726	2	2	2	2	2	2	0.0118492	0.10441	Homo sapiens AKT interacting protein (AKTIP), transcript variant 2, mRNA.
ILMN_2377240	AKTIP	0	0	0.00276383	NA	716.569	1.40041	641.624	NA	1.11681	NA	0.159377	2	2	2	2	2	2	0.28792	0.565089	Homo sapiens AKT interacting protein (AKTIP), transcript variant 1, mRNA.
ILMN_2404657	ALAD	0.0783133	0.0165663	0.0254529	NA	84.7005	1.52444	101.098	NA	0.837808	NA	-0.255308	2	2	2	2	2	2	0.0965208	0.349737	Homo sapiens aminolevulinate, delta-, dehydratase (ALAD), transcript variant 2, mRNA.
ILMN_1679898	ALAD	0.712349	0.76506	0.0224425	NA	66.1938	1.05044	65.0743	NA	1.0172	NA	0.0246069	2	2	2	2	2	2	0.86894	0.778064	Homo sapiens aminolevulinate, delta-, dehydratase (ALAD), transcript variant 1, mRNA.
ILMN_1747577	ALAD	0	0	0.00745946	NA	200.544	1.0578	186.02	NA	1.07808	NA	0.108461	2	2	2	2	2	2	0.46609	0.660849	Homo sapiens aminolevulinate, delta-, dehydratase (ALAD), transcript variant 1, mRNA.
ILMN_2385647	ALAS1	0.0993976	0.0286145	0.0291673	NA	82.8978	1.70972	96.5657	NA	0.85846	NA	-0.220178	2	2	2	2	2	2	0.14813	0.429934	Homo sapiens aminolevulinate, delta-, synthase 1 (ALAS1), transcript variant 2, mRNA.
ILMN_1700047	ALAS1	0.0662651	0.0677711	0.00780398	NA	86.2755	0.47609	86.7	NA	0.995104	NA	-0.00708134	2	2	2	2	2	2	0.961648	0.795813	Homo sapiens aminolevulinate, delta-, synthase 1 (ALAS1), transcript variant 1, mRNA.
ILMN_1728309	ALAS1	0.0828313	0.34488	0.0325522	NA	84.4368	1.94356	73.9616	NA	1.14163	NA	0.191096	2	2	2	2	2	2	0.208164	0.497299	Homo sapiens aminolevulinate, delta-, synthase 1 (ALAS1), transcript variant 1, mRNA.
ILMN_1708323	ALAS2	0.698042	0.129518	0.0722985	NA	66.1334	3.38092	81.2341	NA	0.814108	NA	-0.296707	2	2	2	2	2	2	0.0591222	0.269715	Homo sapiens aminolevulinate, delta-, synthase 2 (ALAS2), nuclear gene encoding mitochondrial protein, transcript variant 2, mRNA.
ILMN_2367126	ALAS2	0.910392	0.646084	0.00865817	NA	61.4228	0.376045	67.8104	NA	0.905801	NA	-0.142734	2	2	2	2	2	2	0.339828	0.59928	Homo sapiens aminolevulinate, delta-, synthase 2 (ALAS2), nuclear gene encoding mitochondrial protein, transcript variant 3, mRNA.
ILMN_2271875	ALAS2	0.0466867	0.0331325	0.205488	NA	98.9461	14.3771	94.1345	NA	1.05111	NA	0.0719196	2	2	2	2	2	2	0.740633	0.74874	Homo sapiens aminolevulinate, delta-, synthase 2 (ALAS2), nuclear gene encoding mitochondrial protein, transcript variant 3, mRNA.
ILMN_1782939	ALB	0.332831	0.90512	0.00103905	NA	73.1247	0.0537262	61.5665	NA	1.18774	NA	0.248213	2	2	2	2	2	2	0.104945	0.36514	Homo sapiens albumin (ALB), mRNA.
ILMN_1670870	ALCAM	0.120482	0.283133	0.071158	NA	82.4767	4.14992	75.8538	NA	1.08731	NA	0.120766	2	2	2	2	2	2	0.433405	0.646726	Homo sapiens activated leukocyte cell adhesion molecule (ALCAM), mRNA.
ILMN_2051381	ALDH16A1	0	0	0.039832	NA	368.274	10.3726	378.352	NA	0.973362	NA	-0.0389518	2	2	2	2	2	2	0.790442	0.759828	Homo sapiens aldehyde dehydrogenase 16 family, member A1 (ALDH16A1), mRNA.
ILMN_2302716	ALDH18A1	0	0	0.0210008	NA	545.051	8.0939	530.531	NA	1.02737	NA	0.0389535	2	2	2	2	2	2	0.793327	0.760277	Homo sapiens aldehyde dehydrogenase 18 family, member A1 (ALDH18A1), nuclear gene encoding mitochondrial protein, transcript variant 1, mRNA.
ILMN_2096372	ALDH1A1	0.972892	0.971386	0.108713	NA	55.5596	4.27094	57.2622	NA	0.970266	NA	-0.043548	2	2	2	2	2	2	0.756986	0.753216	Homo sapiens aldehyde dehydrogenase 1 family, member A1 (ALDH1A1), mRNA.
ILMN_1748538	ALDH1A2	0.365964	0.0376506	0.0864835	NA	73.3198	4.48373	92.3353	NA	0.79406	NA	-0.33268	2	2	2	2	2	2	0.0375465	0.210263	Homo sapiens aldehyde dehydrogenase 1 family, member A2 (ALDH1A2), transcript variant 3, mRNA.
ILMN_2383707	ALDH1A2	0.125	0.222892	0.060989	NA	81.4992	3.51471	77.322	NA	1.05402	NA	0.0759065	2	2	2	2	2	2	0.619841	0.717031	Homo sapiens aldehyde dehydrogenase 1 family, member A2 (ALDH1A2), transcript variant 2, mRNA.
ILMN_2139970	ALDH1A3	0	0	0.0635067	NA	183.395	8.23554	219.725	NA	0.834657	NA	-0.260745	2	2	2	2	2	2	0.0926115	0.342306	Homo sapiens aldehyde dehydrogenase 1 family, member A3 (ALDH1A3), mRNA.
ILMN_2150894	ALDH1B1	0	0	0.101028	NA	177.012	12.6453	182.694	NA	0.968897	NA	-0.0455846	2	2	2	2	2	2	0.748464	0.751037	Homo sapiens aldehyde dehydrogenase 1 family, member B1 (ALDH1B1), nuclear gene encoding mitochondrial protein, mRNA.
ILMN_1802167	ALDH1L1	0.556476	0.475904	0.104352	NA	68.9507	5.08773	70.9824	NA	0.971378	NA	-0.0418952	2	2	2	2	2	2	0.766018	0.754118	Homo sapiens aldehyde dehydrogenase 1 family, member L1 (ALDH1L1), mRNA.
ILMN_2182980	ALDH1L2	0.24247	0.0301205	0.0135553	NA	75.6201	0.724824	94.8902	NA	0.796923	NA	-0.327488	2	2	2	2	2	2	0.0368692	0.208094	Homo sapiens aldehyde dehydrogenase 1 family, member L2 (ALDH1L2), mRNA.
ILMN_1793859	ALDH2	0	0	0.110554	NA	460.643	36.0102	467.941	NA	0.984405	NA	-0.0226761	2	2	2	2	2	2	0.860893	0.77576	Homo sapiens aldehyde dehydrogenase 2 family (mitochondrial) (ALDH2), nuclear gene encoding mitochondrial protein, mRNA.
ILMN_1702503	ALDH3A1	0.243976	0.378012	0.0853109	NA	76.7616	4.63056	73.1278	NA	1.04969	NA	0.0699638	2	2	2	2	2	2	0.658234	0.728963	Homo sapiens aldehyde dehydrogenase 3 family, memberA1 (ALDH3A1), mRNA.
ILMN_2401641	ALDH3A2	0	0	0.0582734	NA	364.856	15.0341	564.278	NA	0.646589	NA	-0.629078	2	2	2	2	2	2	0.000419359	0.0112923	Homo sapiens aldehyde dehydrogenase 3 family, member A2 (ALDH3A2), transcript variant 1, mRNA.
ILMN_1667564	ALDH3A2	0.301205	0.0436747	0.223743	NA	81.6899	12.9242	90.1639	NA	0.906015	NA	-0.142393	2	2	2	2	2	2	0.362533	0.612214	Homo sapiens aldehyde dehydrogenase 3 family, member A2 (ALDH3A2), transcript variant 1, mRNA.
ILMN_1727965	ALDH3B1	0.640813	0.251506	0.0117221	NA	67.7388	0.561474	76.3811	NA	0.886853	NA	-0.173233	2	2	2	2	2	2	0.249426	0.534064	Homo sapiens aldehyde dehydrogenase 3 family, member B1 (ALDH3B1), transcript variant 1, mRNA.
ILMN_1728662	ALDH3B1	0.124247	0.427711	0.0465048	NA	81.0529	2.66533	71.8957	NA	1.12737	NA	0.17296	2	2	2	2	2	2	0.255932	0.539777	Homo sapiens aldehyde dehydrogenase 3 family, member B1 (ALDH3B1), transcript variant 1, mRNA.
ILMN_2363880	ALDH3B2	0.174699	0.103916	0.0471966	NA	78.4076	2.6167	83.1341	NA	0.943146	NA	-0.0844465	2	2	2	2	2	2	0.568814	0.699634	Homo sapiens aldehyde dehydrogenase 3 family, member B2 (ALDH3B2), transcript variant 2, mRNA.
ILMN_1761514	ALDH3B2	0.556476	0.474398	0.0329964	NA	69.0953	1.61213	71.0039	NA	0.97312	NA	-0.0393109	2	2	2	2	2	2	0.789121	0.759661	Homo sapiens aldehyde dehydrogenase 3 family, member B2 (ALDH3B2), transcript variant 1, mRNA.
ILMN_1763666	ALDH3B2	0.661898	0.909639	0.123834	NA	66.0479	5.78341	61.4481	NA	1.07486	NA	0.104145	2	2	2	2	2	2	0.530334	0.686426	Homo sapiens aldehyde dehydrogenase 3 family, member B2 (ALDH3B2), transcript variant 2, mRNA.
ILMN_2244841	ALDH4A1	0.00225904	0	0.0441942	NA	132.552	4.14224	168.827	NA	0.785133	NA	-0.348991	2	2	2	2	2	2	0.0279241	0.17603	Homo sapiens aldehyde dehydrogenase 4 family, member A1 (ALDH4A1), nuclear gene encoding mitochondrial protein, transcript variant P5CDhL, mRNA.
ILMN_1656368	ALDH4A1	0	0	0.0929715	NA	168.222	11.0591	198.757	NA	0.846371	NA	-0.240638	2	2	2	2	2	2	0.122045	0.39275	Homo sapiens aldehyde dehydrogenase 4 family, member A1 (ALDH4A1), nuclear gene encoding mitochondrial protein, transcript variant P5CDhS, mRNA.
ILMN_2406557	ALDH4A1	0.00527108	0.00301205	0.205558	NA	125.332	18.2172	145.601	NA	0.860793	NA	-0.216263	2	2	2	2	2	2	0.184731	0.473735	Homo sapiens aldehyde dehydrogenase 4 family, member A1 (ALDH4A1), nuclear gene encoding mitochondrial protein, transcript variant P5CDhS, mRNA.
ILMN_2372398	ALDH5A1	0.194277	0.0828313	0.110913	NA	79.7963	6.25819	84.479	NA	0.94457	NA	-0.08227	2	2	2	2	2	2	0.576491	0.702126	Homo sapiens aldehyde dehydrogenase 5 family, member A1 (ALDH5A1), nuclear gene encoding mitochondrial protein, transcript variant 2, mRNA.
ILMN_2096985	ALDH6A1	0.0391566	0.0376506	0.164204	NA	97.1378	11.2787	92.4095	NA	1.05117	NA	0.0719926	2	2	2	2	2	2	0.702547	0.741133	Homo sapiens aldehyde dehydrogenase 6 family, member A1 (ALDH6A1), nuclear gene encoding mitochondrial protein, mRNA.
ILMN_1687508	ALDH7A1	0	0	0.0381369	NA	1283.58	34.6141	1382.94	NA	0.928152	NA	-0.107567	2	2	2	2	2	2	0.469882	0.662379	Homo sapiens aldehyde dehydrogenase 7 family, member A1 (ALDH7A1), mRNA.
ILMN_1681938	ALDH8A1	0.698042	0.731928	0.0304226	NA	66.6781	1.43438	65.9443	NA	1.01113	NA	0.0159659	2	2	2	2	2	2	0.916016	0.785566	Homo sapiens aldehyde dehydrogenase 8 family, member A1 (ALDH8A1), transcript variant 1, mRNA.
ILMN_2365176	ALDH8A1	0.223645	0.427711	0.0236399	NA	76.1374	1.27271	71.9082	NA	1.05881	NA	0.0824477	2	2	2	2	2	2	0.579989	0.703774	Homo sapiens aldehyde dehydrogenase 8 family, member A1 (ALDH8A1), transcript variant 1, mRNA.
ILMN_1761804	ALDH9A1	0	0	0.080356	NA	3426.35	194.686	4639.29	NA	0.73855	NA	-0.437233	2	2	2	2	2	2	0.00838539	0.0849367	Homo sapiens aldehyde dehydrogenase 9 family, member A1 (ALDH9A1), mRNA.
ILMN_1681374	ALDOA	0.0903614	0.0376506	0.00964527	NA	83.3917	0.568751	92.5486	NA	0.901058	NA	-0.150308	2	2	2	2	2	2	0.315477	0.58408	Homo sapiens aldolase A, fructose-bisphosphate (ALDOA), transcript variant 1, mRNA.
ILMN_1741148	ALDOA	0	0	0.0303316	NA	2766.85	59.3426	2900.19	NA	0.954025	NA	-0.0679003	2	2	2	2	2	2	0.646191	0.724996	Homo sapiens aldolase A, fructose-bisphosphate (ALDOA), transcript variant 3, mRNA.
ILMN_1736700	ALDOA	0	0	0.0668626	NA	5141.44	243.082	4933.09	NA	1.04223	NA	0.0596793	2	2	2	2	2	2	0.699702	0.74002	Homo sapiens aldolase A, fructose-bisphosphate (ALDOA), transcript variant 2, mRNA.
ILMN_2251253	ALDOA	0.0662651	0.207831	0.00157176	NA	86.0458	0.0956315	77.8432	NA	1.10537	NA	0.144534	2	2	2	2	2	2	0.333882	0.595778	Homo sapiens aldolase A, fructose-bisphosphate (ALDOA), transcript variant 3, mRNA.
ILMN_1747716	ALDOB	0.259789	0.0768072	0.0242243	NA	75.2485	1.28894	85.4617	NA	0.880495	NA	-0.183614	2	2	2	2	2	2	0.223564	0.510173	Homo sapiens aldolase B, fructose-bisphosphate (ALDOB), mRNA.
ILMN_1755974	ALDOC	0	0	0.159016	NA	1589.2	178.692	1830.53	NA	0.868166	NA	-0.203958	2	2	2	2	2	2	0.197443	0.487222	Homo sapiens aldolase C, fructose-bisphosphate (ALDOC), mRNA.
ILMN_1718093	ALG1	0.0060241	0.0060241	0.111338	NA	117.403	9.24292	130.877	NA	0.897051	NA	-0.156739	2	2	2	2	2	2	0.304164	0.576499	Homo sapiens asparagine-linked glycosylation 1 homolog (S. cerevisiae, beta-1,4-mannosyltransferase) (ALG1), mRNA.
ILMN_1666325	ALG10B	0.0105422	0.0150602	0.00140798	NA	104.3	0.10384	104.38	NA	0.999231	NA	-0.00110923	2	2	2	2	2	2	0.994003	0.800302	Homo sapiens asparagine-linked glycosylation 10, alpha-1,2-glucosyltransferase homolog B (yeast) (ALG10B), mRNA.
ILMN_1730304	ALG10B	0.0105422	0.0120482	0.222991	NA	117.145	18.4712	107.077	NA	1.09403	NA	0.129646	2	2	2	2	2	2	0.524746	0.684489	Homo sapiens asparagine-linked glycosylation 10, alpha-1,2-glucosyltransferase homolog B (yeast) (ALG10B), mRNA.
ILMN_2120982	ALG11	0.847892	0.411145	0.00929256	NA	63.3725	0.41641	72.1323	NA	0.878558	NA	-0.18679	2	2	2	2	2	2	0.215548	0.503003	Homo sapiens asparagine-linked glycosylation 11, alpha-1,2-mannosyltransferase homolog (yeast) (ALG11), mRNA.
ILMN_1743995	ALG12	0.0060241	0.0060241	0.0398818	NA	113.304	3.19524	121.485	NA	0.932659	NA	-0.100579	2	2	2	2	2	2	0.498709	0.674692	Homo sapiens asparagine-linked glycosylation 12, alpha-1,6-mannosyltransferase homolog (S. cerevisiae) (ALG12), mRNA.
ILMN_2147503	ALG13	0.608434	0.737952	0.111687	NA	67.8553	5.35886	65.8206	NA	1.03091	NA	0.043922	2	2	2	2	2	2	0.799106	0.762227	Homo sapiens asparagine-linked glycosylation 13 homolog (S. cerevisiae) (ALG13), mRNA.
ILMN_2191822	ALG14	0.000753012	0.00150602	0.0338093	NA	160.685	3.84147	167.455	NA	0.959571	NA	-0.059538	2	2	2	2	2	2	0.68676	0.736721	Homo sapiens asparagine-linked glycosylation 14 homolog (S. cerevisiae) (ALG14), mRNA.
ILMN_2131293	ALG1L	0	0	0.175133	NA	167.434	20.7347	272.242	NA	0.615019	NA	-0.701296	2	2	2	2	2	2	0.00031976	0.00931811	Homo sapiens asparagine-linked glycosylation 1-like (ALG1L), mRNA.
ILMN_1737945	ALG2	0.438253	0.207831	0.0304685	NA	70.9742	1.5291	77.8166	NA	0.91207	NA	-0.132783	2	2	2	2	2	2	0.374238	0.618694	Homo sapiens asparagine-linked glycosylation 2, alpha-1,3-mannosyltransferase homolog (S. cerevisiae) (ALG2), transcript variant 1, mRNA.
ILMN_1711886	ALG3	0	0	0.0124049	NA	967.507	8.48658	1122.83	NA	0.861668	NA	-0.214795	2	2	2	2	2	2	0.157135	0.44128	Homo sapiens asparagine-linked glycosylation 3 homolog (S. cerevisiae, alpha-1,3-mannosyltransferase) (ALG3), mRNA.
ILMN_1664449	ALG5	0.000753012	0.00150602	0.0432032	NA	152.504	4.65889	162.558	NA	0.938155	NA	-0.0921021	2	2	2	2	2	2	0.534963	0.688539	Homo sapiens asparagine-linked glycosylation 5 homolog (S. cerevisiae, dolichyl-phosphate beta-glucosyltransferase) (ALG5), mRNA.
ILMN_1771411	ALG6	0	0	0.0206853	NA	548.394	8.02122	536.298	NA	1.02255	NA	0.0321784	2	2	2	2	2	2	0.828718	0.769748	Homo sapiens asparagine-linked glycosylation 6 homolog (S. cerevisiae, alpha-1,3-glucosyltransferase) (ALG6), mRNA.
ILMN_2271014	ALG8	0.52259	0.652108	0.0763239	NA	69.7192	3.76269	67.6408	NA	1.03073	NA	0.043661	2	2	2	2	2	2	0.783368	0.758718	Homo sapiens asparagine-linked glycosylation 8, alpha-1,3-glucosyltransferase homolog (S. cerevisiae) (ALG8), transcript variant 2, mRNA.
ILMN_2365686	ALG8	0	0	0.0683989	NA	702.572	33.9801	660.608	NA	1.06352	NA	0.0888523	2	2	2	2	2	2	0.563857	0.698536	Homo sapiens asparagine-linked glycosylation 8, alpha-1,3-glucosyltransferase homolog (S. cerevisiae) (ALG8), transcript variant 2, mRNA.
ILMN_1685413	ALG8	0	0	0.000898929	NA	1368.81	0.870068	1104.98	NA	1.23877	NA	0.308903	2	2	2	2	2	2	0.0475182	0.240297	Homo sapiens asparagine-linked glycosylation 8, alpha-1,3-glucosyltransferase homolog (S. cerevisiae) (ALG8), transcript variant 1, mRNA.
ILMN_1732809	ALG9	0	0	0.0822035	NA	435.122	25.2922	406.557	NA	1.07026	NA	0.0979632	2	2	2	2	2	2	0.530619	0.686478	Homo sapiens asparagine-linked glycosylation 9, alpha-1,2-mannosyltransferase homolog (S. cerevisiae) (ALG9), transcript variant 4, mRNA.
ILMN_1753135	ALK	0.307982	0.115964	0.0225041	NA	73.8143	1.17459	82.2864	NA	0.897041	NA	-0.156754	2	2	2	2	2	2	0.296047	0.570233	Homo sapiens anaplastic lymphoma receptor tyrosine kinase (ALK), mRNA.
ILMN_1758038	ALKBH1	0	0	0.160289	NA	341.295	38.6829	353.427	NA	0.965673	NA	-0.0503933	2	2	2	2	2	2	0.712701	0.742612	Homo sapiens alkB, alkylation repair homolog 1 (E. coli) (ALKBH1), mRNA.
ILMN_2276750	ALKBH1	0.00225904	0.00451807	0.158285	NA	137.964	15.4416	137.775	NA	1.00138	NA	0.00198556	2	2	2	2	2	2	0.964905	0.796423	Homo sapiens alkB, alkylation repair homolog 1 (E. coli) (ALKBH1), mRNA.
ILMN_2375973	ALKBH1	0	0	0.115099	NA	389.477	31.6985	339.013	NA	1.14886	NA	0.200197	2	2	2	2	2	2	0.217307	0.504199	Homo sapiens alkB, alkylation repair homolog 1 (E. coli) (ALKBH1), mRNA.
ILMN_1690252	ALKBH2	0	0	0.0190319	NA	607.228	8.17183	545.046	NA	1.11409	NA	0.155859	2	2	2	2	2	2	0.29941	0.573423	Homo sapiens alkB, alkylation repair homolog 2 (E. coli) (ALKBH2), mRNA.
ILMN_2134062	ALKBH3	0	0	0.0186862	NA	269.381	3.55936	238.875	NA	1.12771	NA	0.173397	2	2	2	2	2	2	0.249834	0.534292	Homo sapiens alkB, alkylation repair homolog 3 (E. coli) (ALKBH3), mRNA.
ILMN_1805673	ALKBH4	0.00150602	0	0.105397	NA	138.595	10.3291	173.901	NA	0.796978	NA	-0.327388	2	2	2	2	2	2	0.0420022	0.22455	Homo sapiens alkB, alkylation repair homolog 4 (E. coli) (ALKBH4), mRNA.
ILMN_1657283	ALKBH5	0	0	0.0812249	NA	4517.57	259.465	5585.69	NA	0.808776	NA	-0.306188	2	2	2	2	2	2	0.0529393	0.254303	Homo sapiens alkB, alkylation repair homolog 5 (E. coli) (ALKBH5), mRNA.
ILMN_1808792	ALKBH6	0	0	0.0986435	NA	269.192	18.7766	331.223	NA	0.812723	NA	-0.299165	2	2	2	2	2	2	0.0598249	0.271232	Homo sapiens alkB, alkylation repair homolog 6 (E. coli) (ALKBH6), transcript variant 1, mRNA.
ILMN_1761764	ALKBH7	0	0	0.0540691	NA	454.303	17.3692	455.576	NA	0.997206	NA	-0.00403618	2	2	2	2	2	2	0.972807	0.797423	Homo sapiens alkB, alkylation repair homolog 7 (E. coli) (ALKBH7), mRNA.
ILMN_1779190	ALKBH8	0	0.0105422	0.0865803	NA	161.982	9.9168	107.856	NA	1.50184	NA	0.586732	2	2	2	2	2	2	0.000982113	0.0203796	Homo sapiens alkB, alkylation repair homolog 8 (E. coli) (ALKBH8), mRNA.
ILMN_1796946	ALLC	0.493223	0.436747	0.001503	NA	70.0807	0.0744802	71.7293	NA	0.977016	NA	-0.0335453	2	2	2	2	2	2	0.820433	0.767625	Homo sapiens allantoicase (ALLC), transcript variant 2, mRNA.
ILMN_1681046	ALLC	0.420181	0.39759	0.142964	NA	73.5893	7.43918	72.5423	NA	1.01443	NA	0.0206735	2	2	2	2	2	2	0.93355	0.78826	Homo sapiens allantoicase (ALLC), transcript variant 1, mRNA.
ILMN_1784583	ALLC	0.660392	0.89759	0.0523939	NA	66.9379	2.47992	61.8252	NA	1.0827	NA	0.114629	2	2	2	2	2	2	0.449945	0.653262	Homo sapiens allantoicase (ALLC), transcript variant 1, mRNA.
ILMN_1709474	ALMS1	0	0	0.10177	NA	268.081	19.2917	178.904	NA	1.49847	NA	0.583488	2	2	2	2	2	2	0.00114874	0.0225453	Homo sapiens Alstrom syndrome 1 (ALMS1), mRNA.
ILMN_1713731	ALOX12	0.24247	0.298193	0.00371625	NA	75.4817	0.198349	75.5281	NA	0.999385	NA	-0.000887593	2	2	2	2	2	2	0.995178	0.800302	Homo sapiens arachidonate 12-lipoxygenase (ALOX12), mRNA.
ILMN_1692332	ALOX12B	0.276355	0.231928	0.0865539	NA	75.7735	4.63755	77.1198	NA	0.982543	NA	-0.0254078	2	2	2	2	2	2	0.853261	0.774052	Homo sapiens arachidonate 12-lipoxygenase, 12R type (ALOX12B), mRNA.
ILMN_2137544	ALOX12P2	0.926958	0.51506	0.0107958	NA	60.624	0.462792	70.2213	NA	0.863327	NA	-0.212021	2	2	2	2	2	2	0.162249	0.448205	Homo sapiens arachidonate 12-lipoxygenase pseudogene 2 (ALOX12P2), non-coding RNA.
ILMN_2403534	ALOX15	0.333584	0.0677711	0.055441	NA	73.5145	2.88197	86.5755	NA	0.849137	NA	-0.235931	2	2	2	2	2	2	0.124567	0.396638	Homo sapiens arachidonate 15-lipoxygenase (ALOX15), mRNA.
ILMN_1783443	ALOX15	0.161145	0.126506	0.0706516	NA	79.8669	3.99001	81.5436	NA	0.979439	NA	-0.0299728	2	2	2	2	2	2	0.832914	0.77079	PREDICTED: Homo sapiens arachidonate 15-lipoxygenase (ALOX15), mRNA.
ILMN_1751975	ALOX15B	0.570783	0.277108	0.0838713	NA	68.4924	4.06201	76.0875	NA	0.900178	NA	-0.151717	2	2	2	2	2	2	0.315764	0.584214	Homo sapiens arachidonate 15-lipoxygenase, type B (ALOX15B), transcript variant d, mRNA.
ILMN_2393149	ALOX15B	0.0489458	0.0286145	0.204697	NA	97.917	14.1728	96.3038	NA	1.01675	NA	0.0239676	2	2	2	2	2	2	0.959295	0.795035	Homo sapiens arachidonate 15-lipoxygenase, type B (ALOX15B), transcript variant b, mRNA.
ILMN_2276904	ALOX15B	0.320783	0.402108	0.100294	NA	75.1453	5.32921	72.4215	NA	1.03761	NA	0.0532649	2	2	2	2	2	2	0.746601	0.750333	Homo sapiens arachidonate 15-lipoxygenase, type B (ALOX15B), transcript variant d, mRNA.
ILMN_1792150	ALOX5	0.182982	0.0888554	0.127975	NA	80.8678	7.31789	84.1494	NA	0.961003	NA	-0.0573867	2	2	2	2	2	2	0.687107	0.736799	Homo sapiens arachidonate 5-lipoxygenase (ALOX5), mRNA.
ILMN_1680996	ALOX5	0.0790663	0.0677711	0.0421966	NA	84.8378	2.53135	86.4499	NA	0.981352	NA	-0.0271568	2	2	2	2	2	2	0.851773	0.773883	PREDICTED: Homo sapiens arachidonate 5-lipoxygenase (ALOX5), mRNA.
ILMN_1797875	ALOX5AP	0.597139	0.24247	0.005054	NA	68.3274	0.244183	76.5846	NA	0.892182	NA	-0.16459	2	2	2	2	2	2	0.272917	0.552674	Homo sapiens arachidonate 5-lipoxygenase-activating protein (ALOX5AP), mRNA.
ILMN_1678255	ALOXE3	0.408886	0.150602	0.0180698	NA	71.435	0.912746	80.1616	NA	0.891137	NA	-0.166281	2	2	2	2	2	2	0.268416	0.549033	Homo sapiens arachidonate lipoxygenase 3 (ALOXE3), mRNA.
ILMN_1752669	ALPI	0.0963855	0.233434	0.0613494	NA	83.5703	3.62533	76.9671	NA	1.08579	NA	0.118748	2	2	2	2	2	2	0.43711	0.647639	Homo sapiens alkaline phosphatase, intestinal (ALPI), mRNA.
ILMN_2078697	ALPK1	0.0662651	0.159639	0.0573551	NA	87.0701	3.53123	79.4496	NA	1.09592	NA	0.132139	2	2	2	2	2	2	0.386117	0.624392	Homo sapiens alpha-kinase 1 (ALPK1), mRNA.
ILMN_1811238	ALPK2	0.0760542	0.203313	0.0954545	NA	86.4565	5.83552	77.8769	NA	1.11017	NA	0.15078	2	2	2	2	2	2	0.340524	0.599872	Homo sapiens alpha-kinase 2 (ALPK2), mRNA.
ILMN_1734630	ALPK3	0.665663	0.420181	0.0126886	NA	67.0875	0.601924	72.0116	NA	0.93162	NA	-0.102186	2	2	2	2	2	2	0.491788	0.672372	Homo sapiens alpha-kinase 3 (ALPK3), mRNA.
ILMN_1701603	ALPL	0	0	0.123925	NA	4380.04	383.816	5070.57	NA	0.863817	NA	-0.211202	2	2	2	2	2	2	0.176153	0.464775	Homo sapiens alkaline phosphatase, liver/bone/kidney (ALPL), transcript variant 1, mRNA.
ILMN_1693789	ALPP	0	0	0.00818996	NA	363.793	2.10679	404.374	NA	0.899645	NA	-0.152573	2	2	2	2	2	2	0.308419	0.578588	Homo sapiens alkaline phosphatase, placental (Regan isozyme) (ALPP), mRNA.
ILMN_1801851	ALPPL2	0.127259	0.0798193	0.0341601	NA	80.8289	1.95241	85.0558	NA	0.950304	NA	-0.0735385	2	2	2	2	2	2	0.619277	0.716871	Homo sapiens alkaline phosphatase, placental-like 2 (ALPPL2), mRNA.
ILMN_1750256	ALS2	0	0	0.0568773	NA	669.065	26.9087	552.921	NA	1.21006	NA	0.275073	2	2	2	2	2	2	0.0790965	0.31461	Homo sapiens amyotrophic lateral sclerosis 2 (juvenile) (ALS2), mRNA.
ILMN_1690636	ALS2CL	0.745482	0.358434	0.0486358	NA	65.6611	2.25813	73.5236	NA	0.893062	NA	-0.163168	2	2	2	2	2	2	0.278748	0.557404	Homo sapiens ALS2 C-terminal like (ALS2CL), transcript variant 3, mRNA.
ILMN_1700596	ALS2CL	0.509789	0.427711	0.022241	NA	69.8834	1.09904	71.8637	NA	0.972443	NA	-0.040315	2	2	2	2	2	2	0.784555	0.758969	Homo sapiens ALS2 C-terminal like (ALS2CL), transcript variant 1, mRNA.
ILMN_1702322	ALS2CL	0.060241	0.46988	0.102567	NA	89.4535	6.48769	71.1134	NA	1.2579	NA	0.331018	2	2	2	2	2	2	0.0439839	0.23049	Homo sapiens ALS2 C-terminal like (ALS2CL), transcript variant 1, mRNA.
ILMN_1792449	ALS2CR11	0.635542	0.712349	0.0323299	NA	67.589	1.54513	66.5661	NA	1.01537	NA	0.0220017	2	2	2	2	2	2	0.884086	0.780522	Homo sapiens amyotrophic lateral sclerosis 2 (juvenile) chromosome region, candidate 11 (ALS2CR11), mRNA.
ILMN_1765674	ALS2CR12	0.173946	0.769578	0.129399	NA	81.3084	7.43963	64.9161	NA	1.25252	NA	0.324829	2	2	2	2	2	2	0.0537948	0.256686	Homo sapiens amyotrophic lateral sclerosis 2 (juvenile) chromosome region, candidate 12 (ALS2CR12), mRNA.
ILMN_1663897	ALS2CR16	0.564006	0.638554	0.0631942	NA	68.6898	3.06941	67.8872	NA	1.01182	NA	0.0169558	2	2	2	2	2	2	0.917616	0.785678	PREDICTED: Homo sapiens amyotrophic lateral sclerosis 2 (juvenile) chromosome region, candidate 16 (ALS2CR16), mRNA.
ILMN_1800958	ALS2CR4	0	0	0.00225022	NA	996.305	1.58527	895.992	NA	1.11196	NA	0.153102	2	2	2	2	2	2	0.306758	0.577559	Homo sapiens amyotrophic lateral sclerosis 2 (juvenile) chromosome region, candidate 4 (ALS2CR4), transcript variant 1, mRNA.
ILMN_1760889	ALS2CR8	0.0700301	0.168675	0.007443	NA	85.7285	0.451189	79.1094	NA	1.08367	NA	0.115925	2	2	2	2	2	2	0.43643	0.647315	Homo sapiens amyotrophic lateral sclerosis 2 (juvenile) chromosome region, candidate 8 (ALS2CR8), mRNA.
ILMN_2191902	ALX3	0.308735	0.590361	0.0321331	NA	73.8067	1.677	68.786	NA	1.07299	NA	0.101635	2	2	2	2	2	2	0.497336	0.674331	Homo sapiens ALX homeobox 3 (ALX3), mRNA.
ILMN_1803384	ALX4	0.832078	0.635542	0.0630728	NA	62.955	2.80774	67.9645	NA	0.926292	NA	-0.11046	2	2	2	2	2	2	0.458889	0.657717	Homo sapiens ALX homeobox 4 (ALX4), mRNA.
ILMN_1797432	AMAC1	0.443524	0.0677711	0.0748896	NA	71.3773	3.77978	86.7309	NA	0.822974	NA	-0.28108	2	2	2	2	2	2	0.0726088	0.300094	Homo sapiens acyl-malonyl condensing enzyme 1 (AMAC1), mRNA.
ILMN_2194619	AMAC1L2	0.790663	0.748494	0.0294028	NA	64.4894	1.34079	65.5168	NA	0.984319	NA	-0.0228016	2	2	2	2	2	2	0.876087	0.779407	Homo sapiens acyl-malonyl condensing enzyme 1-like 2 (AMAC1L2), mRNA.
ILMN_2367172	AMACR	0.00150602	0.00451807	0.0199088	NA	140.6	1.97932	139.454	NA	1.00822	NA	0.0118097	2	2	2	2	2	2	0.937136	0.789168	Homo sapiens alpha-methylacyl-CoA racemase (AMACR), transcript variant 2, mRNA.
ILMN_1759670	AMACR	0	0	0.0543005	NA	236.905	9.09625	177.628	NA	1.33371	NA	0.415448	2	2	2	2	2	2	0.0111883	0.101118	Homo sapiens alpha-methylacyl-CoA racemase (AMACR), transcript variant 1, mRNA.
ILMN_1751092	AMBN	0.631024	0.444277	0.101412	NA	67.2125	4.81973	71.5664	NA	0.939164	NA	-0.0905514	2	2	2	2	2	2	0.541161	0.691117	Homo sapiens ameloblastin (enamel matrix protein) (AMBN), mRNA.
ILMN_1794384	AMBN	0.231175	0.277108	0.00686959	NA	75.927	0.368818	76.049	NA	0.998395	NA	-0.00231719	2	2	2	2	2	2	0.987392	0.799433	Homo sapiens ameloblastin (enamel matrix protein) (AMBN), mRNA.
ILMN_1695446	AMBP	0.0534639	0.0753012	0.128611	NA	92.1201	8.37755	85.6191	NA	1.07593	NA	0.105583	2	2	2	2	2	2	0.527939	0.685376	Homo sapiens alpha-1-microglobulin/bikunin precursor (AMBP), mRNA.
ILMN_1662681	AMBRA1	0.00451807	0.0150602	0.0559099	NA	117.644	4.65096	105.183	NA	1.11847	NA	0.161525	2	2	2	2	2	2	0.290539	0.567663	Homo sapiens autophagy/beclin-1 regulator 1 (AMBRA1), mRNA.
ILMN_1788462	AMD1	0	0	0.0212847	NA	632.635	9.52151	1013.43	NA	0.624248	NA	-0.679808	2	2	2	2	2	2	0.000173936	0.00620801	Homo sapiens adenosylmethionine decarboxylase 1 (AMD1), transcript variant 2, mRNA.
ILMN_1667994	AMD1	0	0	0.00176094	NA	895.788	1.11541	1336.87	NA	0.670065	NA	-0.577627	2	2	2	2	2	2	0.000840604	0.0181332	Homo sapiens adenosylmethionine decarboxylase 1 (AMD1), transcript variant 1, mRNA.
ILMN_1788239	AMDHD1	0.389307	0.432229	0.129674	NA	74.0472	6.78965	71.8328	NA	1.03083	NA	0.0438023	2	2	2	2	2	2	0.810431	0.764842	Homo sapiens amidohydrolase domain containing 1 (AMDHD1), mRNA.
ILMN_1695759	AMDHD2	0	0	0.0754302	NA	393.87	21.0079	296.861	NA	1.32678	NA	0.407933	2	2	2	2	2	2	0.013483	0.113135	Homo sapiens amidohydrolase domain containing 2 (AMDHD2), mRNA.
ILMN_2397406	AMELX	0.786145	0.677711	0.0325441	NA	64.657	1.48789	67.1758	NA	0.962503	NA	-0.0551366	2	2	2	2	2	2	0.70864	0.741876	Homo sapiens amelogenin (amelogenesis imperfecta 1, X-linked) (AMELX), transcript variant 1, mRNA.
ILMN_1727258	AMELY	0.234187	0.302711	0.119891	NA	78.4061	6.64695	75.4174	NA	1.03963	NA	0.0560694	2	2	2	2	2	2	0.744345	0.749778	Homo sapiens amelogenin, Y-linked (AMELY), mRNA.
ILMN_1666258	AMFR	0.00527108	0.0165663	0.00166469	NA	115.374	0.135808	101.56	NA	1.13602	NA	0.183988	2	2	2	2	2	2	0.222166	0.509125	Homo sapiens autocrine motility factor receptor (AMFR), mRNA.
ILMN_1723116	AMFR	0	0	0.026348	NA	223.642	4.16663	191.391	NA	1.16851	NA	0.224668	2	2	2	2	2	2	0.141193	0.419755	Homo sapiens autocrine motility factor receptor (AMFR), mRNA.
ILMN_1660995	AMH	0.000753012	0.0060241	0.184734	NA	166.046	21.69	125.634	NA	1.32166	NA	0.402356	2	2	2	2	2	2	0.0282601	0.177351	Homo sapiens anti-Mullerian hormone (AMH), mRNA.
ILMN_1736412	AMHR2	0.0353916	0.118976	0.0997673	NA	94.4554	6.66346	82.1894	NA	1.14924	NA	0.200681	2	2	2	2	2	2	0.208359	0.497475	Homo sapiens anti-Mullerian hormone receptor, type II (AMHR2), mRNA.
ILMN_1778723	AMICA1	0.128765	0.0798193	0.0104216	NA	80.196	0.590979	85.1666	NA	0.941636	NA	-0.0867586	2	2	2	2	2	2	0.558706	0.69701	Homo sapiens adhesion molecule, interacts with CXADR antigen 1 (AMICA1), mRNA.
ILMN_1765460	AMIGO1	0.145331	0.332831	0.0539501	NA	80.1165	3.05632	74.4209	NA	1.07653	NA	0.106391	2	2	2	2	2	2	0.483512	0.668881	Homo sapiens adhesion molecule with Ig-like domain 1 (AMIGO1), mRNA.
ILMN_1725896	AMIGO2	0.0865964	0.0481928	0.0184841	NA	83.7618	1.09479	89.7867	NA	0.932898	NA	-0.100209	2	2	2	2	2	2	0.500116	0.675386	Homo sapiens adhesion molecule with Ig-like domain 2 (AMIGO2), mRNA.
ILMN_1738233	AMIGO3	0.149849	0.231928	0.0660535	NA	79.9927	3.73621	76.97	NA	1.03927	NA	0.0555729	2	2	2	2	2	2	0.719636	0.743781	Homo sapiens adhesion molecule with Ig-like domain 3 (AMIGO3), mRNA.
ILMN_1779374	AMMECR1	0	0	0.0584082	NA	266.939	11.0248	478.103	NA	0.55833	NA	-0.840811	2	2	2	2	2	2	1.73307e-05	0.00109744	Homo sapiens Alport syndrome, mental retardation, midface hypoplasia and elliptocytosis chromosomal region gene 1 (AMMECR1), transcript variant 1, mRNA.
ILMN_2394242	AMMECR1	0	0	0.0497579	NA	415.544	14.6206	462.758	NA	0.897972	NA	-0.155258	2	2	2	2	2	2	0.301958	0.575095	Homo sapiens Alport syndrome, mental retardation, midface hypoplasia and elliptocytosis chromosomal region gene 1 (AMMECR1), transcript variant 2, mRNA.
ILMN_1670506	AMMECR1	0.120482	0.0768072	0.0620138	NA	81.7459	3.58459	85.553	NA	0.9555	NA	-0.0656717	2	2	2	2	2	2	0.655435	0.728343	Homo sapiens Alport syndrome, mental retardation, midface hypoplasia and elliptocytosis chromosomal region gene 1 (AMMECR1), transcript variant 1, mRNA.
ILMN_1727023	AMMECR1L	0.00527108	0.00903614	0.178061	NA	124.389	15.6616	111.704	NA	1.11356	NA	0.155176	2	2	2	2	2	2	0.38894	0.6264	Homo sapiens AMME chromosomal region gene 1-like (AMMECR1L), mRNA.
ILMN_1683901	AMN	0.45256	0.5	0.0190073	NA	70.7282	0.950599	70.3994	NA	1.00467	NA	0.00672345	2	2	2	2	2	2	0.964442	0.796308	Homo sapiens amnionless homolog (mouse) (AMN), mRNA.
ILMN_1750880	AMN1	0.745482	0.748494	0.00206088	NA	65.5082	0.0954625	65.4723	NA	1.00055	NA	0.000790456	2	2	2	2	2	2	0.995738	0.800302	Homo sapiens antagonist of mitotic exit network 1 homolog (S. cerevisiae) (AMN1), mRNA.
ILMN_1792409	AMOT	0	0	0.12153	NA	359.426	30.8871	219.347	NA	1.63862	NA	0.712479	2	2	2	2	2	2	0.000200651	0.00682004	Homo sapiens angiomotin (AMOT), transcript variant 2, mRNA.
ILMN_1778788	AMOTL2	0.346386	0.207831	0.118613	NA	74.8411	6.27708	77.8288	NA	0.961612	NA	-0.0564729	2	2	2	2	2	2	0.69295	0.737988	Homo sapiens angiomotin like 2 (AMOTL2), mRNA.
ILMN_1759312	AMPD1	0.419428	0.695783	0.0922141	NA	72.667	4.73826	66.7997	NA	1.08783	NA	0.121458	2	2	2	2	2	2	0.441262	0.649598	Homo sapiens adenosine monophosphate deaminase 1 (isoform M) (AMPD1), mRNA.
ILMN_1696830	AMPD2	0.204819	0.0150602	0.0115522	NA	76.8497	0.627758	104.225	NA	0.737343	NA	-0.439593	2	2	2	2	2	2	0.00715196	0.0758479	Homo sapiens adenosine monophosphate deaminase 2 (isoform L) (AMPD2), transcript variant 3, mRNA.
ILMN_1701589	AMPD2	0.46009	0.528614	0.0860002	NA	71.3446	4.33855	69.9185	NA	1.0204	NA	0.0291289	2	2	2	2	2	2	0.861772	0.776035	Homo sapiens adenosine monophosphate deaminase 2 (isoform L) (AMPD2), transcript variant 1, mRNA.
ILMN_1786899	AMPD2	0.243223	0.510542	0.0689207	NA	76.414	3.72398	70.31	NA	1.08681	NA	0.120106	2	2	2	2	2	2	0.434956	0.646741	Homo sapiens adenosine monophosphate deaminase 2 (isoform L) (AMPD2), transcript variant 2, mRNA.
ILMN_1774447	AMPD3	0.454066	0.587349	0.042862	NA	70.9835	2.15137	68.8445	NA	1.03107	NA	0.0441435	2	2	2	2	2	2	0.770288	0.755201	Homo sapiens adenosine monophosphate deaminase (isoform E) (AMPD3), transcript variant 1, mRNA.
ILMN_1660854	AMPD3	0.371235	0.551205	0.049008	NA	72.6532	2.51772	69.4432	NA	1.04623	NA	0.0651937	2	2	2	2	2	2	0.666849	0.731553	Homo sapiens adenosine monophosphate deaminase (isoform E) (AMPD3), transcript variant 1, mRNA.
ILMN_1665307	AMPD3	0.536145	0.721386	0.0415145	NA	69.4148	2.03768	66.3254	NA	1.04658	NA	0.0656828	2	2	2	2	2	2	0.662481	0.730616	Homo sapiens adenosine monophosphate deaminase (isoform E) (AMPD3), transcript variant 2, mRNA.
ILMN_1731223	AMPD3	0.408886	0.911145	0.151415	NA	74.2839	7.95331	61.4311	NA	1.20922	NA	0.27408	2	2	2	2	2	2	0.109631	0.372067	Homo sapiens adenosine monophosphate deaminase (isoform E) (AMPD3), transcript variant 3, mRNA.
ILMN_1725297	AMPH	0.200301	0.0707831	1.1134e-05	NA	77.2576	0.000608241	85.9824	NA	0.898527	NA	-0.154366	2	2	2	2	2	2	0.302878	0.575685	Homo sapiens amphiphysin (AMPH), transcript variant 1, mRNA.
ILMN_1685834	AMPH	0	0	0.125068	NA	358.098	31.6689	243.498	NA	1.47064	NA	0.556446	2	2	2	2	2	2	0.00206966	0.0334662	Homo sapiens amphiphysin (AMPH), transcript variant 1, mRNA.
ILMN_1665331	AMT	0	0	0.0120465	NA	586.227	4.99358	628.842	NA	0.932233	NA	-0.101238	2	2	2	2	2	2	0.495759	0.674138	Homo sapiens aminomethyltransferase (AMT), mRNA.
ILMN_1713927	AMTN	0.697289	0.721386	0.127719	NA	64.8962	5.86084	66.3371	NA	0.978279	NA	-0.0316821	2	2	2	2	2	2	0.810708	0.764931	Homo sapiens amelotin (AMTN), mRNA.
ILMN_2294762	AMY1A	0	0	0.0473548	NA	266.61	8.92742	357.901	NA	0.744928	NA	-0.424827	2	2	2	2	2	2	0.00930951	0.0907387	Homo sapiens amylase, alpha 1A (salivary) (AMY1A), transcript variant 1, mRNA.
ILMN_1797796	AMY1A	0.740211	0.475904	0.0332123	NA	65.7951	1.54518	70.9796	NA	0.926959	NA	-0.109423	2	2	2	2	2	2	0.462308	0.658831	Homo sapiens amylase, alpha 1A (salivary) (AMY1A), transcript variant 2, mRNA.
ILMN_2408219	AMY1A	0.948042	0.896084	0.0141365	NA	59.4116	0.593881	61.8472	NA	0.96062	NA	-0.0579622	2	2	2	2	2	2	0.695174	0.738435	Homo sapiens amylase, alpha 1A (salivary) (AMY1A), transcript variant 1, mRNA.
ILMN_2094262	AMY1B	0.752259	0.861446	0.09173	NA	64.6179	4.19131	62.9791	NA	1.02602	NA	0.0370628	2	2	2	2	2	2	0.823527	0.768132	Homo sapiens amylase, alpha 1B (salivary) (AMY1B), mRNA.
ILMN_2131123	AMY2A	0.57003	0.783133	0.085409	NA	68.5544	4.14022	64.5068	NA	1.06275	NA	0.0877991	2	2	2	2	2	2	0.576458	0.702126	Homo sapiens amylase, alpha 2A (pancreatic) (AMY2A), mRNA.
ILMN_2073157	AMY2B	0.231175	0.570783	0.00288348	NA	75.8576	0.154668	69.1518	NA	1.09697	NA	0.133528	2	2	2	2	2	2	0.371141	0.616848	Homo sapiens amylase, alpha 2B (pancreatic) (AMY2B), mRNA.
ILMN_1785742	AMZ1	0.743223	0.534639	0.0201546	NA	65.5425	0.934074	69.8012	NA	0.938988	NA	-0.0908211	2	2	2	2	2	2	0.540617	0.690958	Homo sapiens archaelysin family metallopeptidase 1 (AMZ1), mRNA.
ILMN_2309549	AMZ2	0.0730422	0.343373	0.0381947	NA	86.2216	2.32865	74.1367	NA	1.16301	NA	0.217862	2	2	2	2	2	2	0.154605	0.437883	Homo sapiens archaelysin family metallopeptidase 2 (AMZ2), transcript variant 6, mRNA.
ILMN_1801606	AMZ2	0	0	0.0518322	NA	3172.11	116.261	2627.13	NA	1.20744	NA	0.271953	2	2	2	2	2	2	0.0815024	0.320695	Homo sapiens archaelysin family metallopeptidase 2 (AMZ2), transcript variant 2, mRNA.
ILMN_1804812	ANAPC1	0	0	0.0271731	NA	1472.85	28.2998	1293.61	NA	1.13856	NA	0.187209	2	2	2	2	2	2	0.216375	0.503728	Homo sapiens anaphase promoting complex subunit 1 (ANAPC1), mRNA.
ILMN_1770378	ANAPC10	0	0	0.123073	NA	410.441	35.7188	350.994	NA	1.16937	NA	0.22573	2	2	2	2	2	2	0.169337	0.45629	Homo sapiens anaphase promoting complex subunit 10 (ANAPC10), mRNA.
ILMN_1722102	ANAPC11	0	0	0.0651398	NA	904.938	41.6822	1309.54	NA	0.691032	NA	-0.533175	2	2	2	2	2	2	0.00187991	0.0312208	Homo sapiens anaphase promoting complex subunit 11 (ANAPC11), transcript variant 4, mRNA.
ILMN_2343563	ANAPC11	0	0	0.0217937	NA	1004.04	15.4728	1379.14	NA	0.72802	NA	-0.45795	2	2	2	2	2	2	0.00544713	0.0632712	Homo sapiens anaphase promoting complex subunit 11 (ANAPC11), transcript variant 4, mRNA.
ILMN_1726281	ANAPC11	0.123494	0.0557229	0.090911	NA	83.1933	5.34798	88.3796	NA	0.941318	NA	-0.0872464	2	2	2	2	2	2	0.555576	0.695294	Homo sapiens anaphase promoting complex subunit 11 (ANAPC11), transcript variant 1, mRNA.
ILMN_1753773	ANAPC11	0.114458	0.25	0.066346	NA	82.7479	3.88201	76.4108	NA	1.08293	NA	0.114946	2	2	2	2	2	2	0.453845	0.654466	Homo sapiens anaphase promoting complex subunit 11 (ANAPC11), transcript variant 1, mRNA.
ILMN_1793894	ANAPC13	0	0	0.00626295	NA	1250.64	5.53855	1669.83	NA	0.748961	NA	-0.417037	2	2	2	2	2	2	0.0100332	0.0950335	Homo sapiens anaphase promoting complex subunit 13 (ANAPC13), mRNA.
ILMN_1813243	ANAPC2	0.00527108	0.00301205	0.00142823	NA	113.667	0.114794	151.756	NA	0.749014	NA	-0.416935	2	2	2	2	2	2	0.0100414	0.095041	Homo sapiens anaphase promoting complex subunit 2 (ANAPC2), mRNA.
ILMN_1733096	ANAPC2	0.0481928	0.0060241	0.199499	NA	96.7695	13.651	121.572	NA	0.795983	NA	-0.32919	2	2	2	2	2	2	0.0537096	0.256341	Homo sapiens anaphase promoting complex subunit 2 (ANAPC2), mRNA.
ILMN_1802973	ANAPC4	0	0	0.128513	NA	476.934	43.3401	496.653	NA	0.960295	NA	-0.0584509	2	2	2	2	2	2	0.682066	0.735029	Homo sapiens anaphase promoting complex subunit 4 (ANAPC4), mRNA.
ILMN_1723177	ANAPC5	0	0	0.0700593	NA	1704.23	84.4266	1943.89	NA	0.87671	NA	-0.189828	2	2	2	2	2	2	0.212543	0.500988	Homo sapiens anaphase promoting complex subunit 5 (ANAPC5), mRNA.
ILMN_2199284	ANAPC7	0	0	0.111708	NA	307.56	24.2941	317.902	NA	0.967468	NA	-0.0477138	2	2	2	2	2	2	0.736067	0.747816	Homo sapiens anaphase promoting complex subunit 7 (ANAPC7), mRNA.
ILMN_1760727	ANG	0.0225904	0.0436747	0.140583	NA	102.368	10.1761	91.1169	NA	1.12348	NA	0.167971	2	2	2	2	2	2	0.317487	0.585419	Homo sapiens angiogenin, ribonuclease, RNase A family, 5 (ANG), transcript variant 2, mRNA.
ILMN_1665871	ANGEL1	0.0112952	0.0120482	0.0817868	NA	106.178	6.14051	107.261	NA	0.989906	NA	-0.0146368	2	2	2	2	2	2	0.910383	0.784989	Homo sapiens angel homolog 1 (Drosophila) (ANGEL1), mRNA.
ILMN_1736340	ANGEL2	0	0	0.0830254	NA	596.811	35.0375	625.634	NA	0.95393	NA	-0.0680448	2	2	2	2	2	2	0.642705	0.723646	Homo sapiens angel homolog 2 (Drosophila) (ANGEL2), mRNA.
ILMN_2086890	ANGPT1	0.0730422	0.0346385	0.0687846	NA	85.9386	4.17988	93.2211	NA	0.921879	NA	-0.11735	2	2	2	2	2	2	0.432379	0.646655	Homo sapiens angiopoietin 1 (ANGPT1), mRNA.
ILMN_1774207	ANGPT2	0.288404	0.495482	0.0185853	NA	74.291	0.976315	70.5203	NA	1.05347	NA	0.0751499	2	2	2	2	2	2	0.613152	0.71496	Homo sapiens angiopoietin 2 (ANGPT2), mRNA.
ILMN_1758443	ANGPT4	0.847892	0.656627	0.024614	NA	63.2607	1.10103	67.5861	NA	0.936002	NA	-0.0954171	2	2	2	2	2	2	0.520582	0.683101	Homo sapiens angiopoietin 4 (ANGPT4), mRNA.
ILMN_2145501	ANGPTL1	0.500753	0.358434	0.0371721	NA	70.0071	1.84011	73.5283	NA	0.952111	NA	-0.0707978	2	2	2	2	2	2	0.63215	0.721007	Homo sapiens angiopoietin-like 1 (ANGPTL1), mRNA.
ILMN_1772612	ANGPTL2	0.000753012	0.0256024	0.154206	NA	151.535	16.5234	97.7091	NA	1.55088	NA	0.633083	2	2	2	2	2	2	0.000899345	0.019032	Homo sapiens angiopoietin-like 2 (ANGPTL2), mRNA.
ILMN_2143220	ANGPTL3	0.879518	0.933735	0.0684386	NA	61.8412	2.99271	60.0921	NA	1.02911	NA	0.0413938	2	2	2	2	2	2	0.791925	0.759956	Homo sapiens angiopoietin-like 3 (ANGPTL3), mRNA.
ILMN_1707727	ANGPTL4	0.0150602	0.00903614	0.0728069	NA	101.366	5.21857	111.106	NA	0.912336	NA	-0.132363	2	2	2	2	2	2	0.377958	0.620371	Homo sapiens angiopoietin-like 4 (ANGPTL4), transcript variant 1, mRNA.
ILMN_1674376	ANGPTL4	0.0271084	0.0436747	0.15509	NA	101.118	11.0891	90.9653	NA	1.11161	NA	0.152651	2	2	2	2	2	2	0.376451	0.619198	Homo sapiens angiopoietin-like 4 (ANGPTL4), transcript variant 1, mRNA.
ILMN_2386444	ANGPTL4	0.146837	0.478916	0.0946517	NA	81.155	5.43161	70.8623	NA	1.14525	NA	0.195663	2	2	2	2	2	2	0.217261	0.504199	Homo sapiens angiopoietin-like 4 (ANGPTL4), transcript variant 3, mRNA.
ILMN_2166696	ANGPTL5	0.745482	0.78012	0.0139589	NA	65.5291	0.646803	64.5758	NA	1.01476	NA	0.0211421	2	2	2	2	2	2	0.886658	0.781214	Homo sapiens angiopoietin-like 5 (ANGPTL5), mRNA.
ILMN_1725518	ANGPTL6	0.601657	0.143072	0.0318039	NA	68.2729	1.53537	80.4451	NA	0.848688	NA	-0.236693	2	2	2	2	2	2	0.121761	0.39243	Homo sapiens angiopoietin-like 6 (ANGPTL6), mRNA.
ILMN_1813361	ANGPTL7	0.752259	0.932229	0.116463	NA	63.8923	5.26165	60.3636	NA	1.05846	NA	0.0819639	2	2	2	2	2	2	0.620958	0.717031	Homo sapiens angiopoietin-like 7 (ANGPTL7), mRNA.
ILMN_1684694	ANK1	0.339608	0.0165663	0.203788	NA	78.9237	11.3729	99.8272	NA	0.790603	NA	-0.338974	2	2	2	2	2	2	0.04854	0.243447	Homo sapiens ankyrin 1, erythrocytic (ANK1), transcript variant 5, mRNA.
ILMN_2317186	ANK1	0.194277	0.0451807	0.0133449	NA	77.227	0.728733	89.9515	NA	0.858541	NA	-0.220041	2	2	2	2	2	2	0.147791	0.429388	Homo sapiens ankyrin 1, erythrocytic (ANK1), transcript variant 4, mRNA.
ILMN_1776363	ANK2	0.324548	0.128012	0.0566052	NA	73.8456	2.95574	81.3632	NA	0.907604	NA	-0.139865	2	2	2	2	2	2	0.351264	0.606824	Homo sapiens ankyrin 2, neuronal (ANK2), transcript variant 2, mRNA.
ILMN_1652729	ANK2	0.298946	0.421687	0.00410306	NA	73.9311	0.214496	71.9905	NA	1.02696	NA	0.0383762	2	2	2	2	2	2	0.795204	0.761134	Homo sapiens ankyrin 2, neuronal (ANK2), transcript variant 1, mRNA.
ILMN_1651943	ANK3	0.521084	0.0677711	0.179441	NA	70.3916	8.93155	86.4019	NA	0.814699	NA	-0.295661	2	2	2	2	2	2	0.0750502	0.305626	Homo sapiens ankyrin 3, node of Ranvier (ankyrin G) (ANK3), transcript variant 1, mRNA.
ILMN_1661875	ANK3	0.0203313	0.0165663	0.0348722	NA	98.1192	2.41946	100.65	NA	0.974855	NA	-0.036741	2	2	2	2	2	2	0.802311	0.762873	Homo sapiens ankyrin 3, node of Ranvier (ankyrin G) (ANK3), transcript variant 2, mRNA.
ILMN_2390609	ANK3	0.0421687	0.141566	0.0498793	NA	90.4968	3.19182	80.6442	NA	1.12217	NA	0.166296	2	2	2	2	2	2	0.275079	0.554748	Homo sapiens ankyrin 3, node of Ranvier (ankyrin G) (ANK3), transcript variant 2, mRNA.
ILMN_2112829	ANKAR	0.338102	0.388554	0.00727778	NA	72.8835	0.375071	72.8102	NA	1.00101	NA	0.00145198	2	2	2	2	2	2	0.99226	0.800001	Homo sapiens ankyrin and armadillo repeat containing (ANKAR), mRNA.
ILMN_1813139	ANKDD1A	0.00225904	0.0060241	0.0270587	NA	131.442	2.51492	129.569	NA	1.01445	NA	0.0206991	2	2	2	2	2	2	0.890286	0.781615	Homo sapiens ankyrin repeat and death domain containing 1A (ANKDD1A), mRNA.
ILMN_1811239	ANKFN1	0.229669	0.281627	0.0315934	NA	75.999	1.69781	75.8786	NA	1.00159	NA	0.00228638	2	2	2	2	2	2	0.989633	0.799885	Homo sapiens ankyrin-repeat and fibronectin type III domain containing 1 (ANKFN1), mRNA.
ILMN_1794470	ANKFY1	0	0	0.0497658	NA	484.019	17.0325	622.081	NA	0.778065	NA	-0.362038	2	2	2	2	2	2	0.0233817	0.157674	Homo sapiens ankyrin repeat and FYVE domain containing 1 (ANKFY1), transcript variant 1, mRNA.
ILMN_1801464	ANKFY1	0.00225904	0.00301205	0.04628	NA	129.244	4.22951	148.949	NA	0.867708	NA	-0.204719	2	2	2	2	2	2	0.178204	0.466711	Homo sapiens ankyrin repeat and FYVE domain containing 1 (ANKFY1), transcript variant 2, mRNA.
ILMN_1735364	ANKFY1	0.0858434	0.13253	0.0507647	NA	84.2109	3.02284	80.9982	NA	1.03966	NA	0.0561176	2	2	2	2	2	2	0.711895	0.74235	Homo sapiens ankyrin repeat and FYVE domain containing 1 (ANKFY1), transcript variant 1, mRNA.
ILMN_1692080	ANKH	0.32756	0.063253	0.0830565	NA	74.2918	4.36315	87.9496	NA	0.844709	NA	-0.243474	2	2	2	2	2	2	0.116701	0.384053	Homo sapiens ankylosis, progressive homolog (mouse) (ANKH), mRNA. XM_944228
ILMN_1778304	ANKHD1	0.962349	0.759036	0.0781765	NA	57.7379	3.1917	65.2056	NA	0.885475	NA	-0.175477	2	2	2	2	2	2	0.248351	0.533135	Homo sapiens ankyrin repeat and KH domain containing 1 (ANKHD1), transcript variant 2, mRNA.
ILMN_2341382	ANKHD1	0.0210843	0.0451807	0.0471051	NA	97.1169	3.2348	89.8575	NA	1.08079	NA	0.112084	2	2	2	2	2	2	0.458358	0.657423	Homo sapiens ankyrin repeat and KH domain containing 1 (ANKHD1), transcript variant 3, mRNA.
ILMN_1766560	ANKHD1-EIF4EBP3	0.0489458	0.0677711	0.0580882	NA	89.1902	3.66345	87.4085	NA	1.02038	NA	0.0291113	2	2	2	2	2	2	0.852169	0.77392	Homo sapiens ANKHD1-EIF4EBP3 readthrough (ANKHD1-EIF4EBP3), mRNA.
ILMN_1797873	ANKK1	0.904367	0.981928	0.046395	NA	61.2833	2.01047	55.7499	NA	1.09925	NA	0.136525	2	2	2	2	2	2	0.367281	0.614939	Homo sapiens ankyrin repeat and kinase domain containing 1 (ANKK1), mRNA.
ILMN_2251062	ANKMY1	0.404367	0.427711	0.0577822	NA	71.951	2.93979	71.9183	NA	1.00045	NA	0.000654944	2	2	2	2	2	2	0.997065	0.800302	Homo sapiens ankyrin repeat and MYND domain containing 1 (ANKMY1), transcript variant 2, mRNA.
ILMN_1799369	ANKMY1	0.513554	0.576807	0.0626037	NA	69.9344	3.09582	69.0753	NA	1.01244	NA	0.0178316	2	2	2	2	2	2	0.912818	0.785378	Homo sapiens ankyrin repeat and MYND domain containing 1 (ANKMY1), transcript variant 1, mRNA.
ILMN_1675483	ANKMY1	0.0323795	0.0436747	0.104651	NA	96.4913	7.14031	90.5569	NA	1.06553	NA	0.0915747	2	2	2	2	2	2	0.570754	0.699991	Homo sapiens ankyrin repeat and MYND domain containing 1 (ANKMY1), transcript variant 2, mRNA.
ILMN_1784292	ANKMY2	0	0	0.111008	NA	252.428	19.8143	238.485	NA	1.05847	NA	0.0819754	2	2	2	2	2	2	0.617338	0.716166	Homo sapiens ankyrin repeat and MYND domain containing 2 (ANKMY2), mRNA.
ILMN_2185563	ANKRA2	0	0.00301205	0.115457	NA	190.994	15.5929	156.259	NA	1.22229	NA	0.289591	2	2	2	2	2	2	0.0786012	0.313418	Homo sapiens ankyrin repeat, family A (RFXANK-like), 2 (ANKRA2), mRNA.
ILMN_1716264	ANKRD1	0.747741	0.356928	0.0124314	NA	65.7364	0.577846	73.5499	NA	0.893766	NA	-0.162032	2	2	2	2	2	2	0.280306	0.55888	Homo sapiens ankyrin repeat domain 1 (cardiac muscle) (ANKRD1), mRNA.
ILMN_2115218	ANKRD10	0	0	0.0485803	NA	192.994	6.62962	235.577	NA	0.819237	NA	-0.287647	2	2	2	2	2	2	0.064715	0.282859	Homo sapiens ankyrin repeat domain 10 (ANKRD10), mRNA.
ILMN_2108709	ANKRD11	0	0	0.065881	NA	1015.47	47.3058	799.961	NA	1.26941	NA	0.344153	2	2	2	2	2	2	0.0322253	0.191636	Homo sapiens ankyrin repeat domain 11 (ANKRD11), mRNA.
ILMN_1661833	ANKRD12	0.00225904	0.0060241	0.0565011	NA	136.56	5.45587	121.235	NA	1.12641	NA	0.171727	2	2	2	2	2	2	0.26205	0.544131	Homo sapiens ankyrin repeat domain 12 (ANKRD12), transcript variant 1, mRNA.
ILMN_1689908	ANKRD13A	0	0	0.126808	NA	244.025	21.881	230.858	NA	1.05703	NA	0.0800217	2	2	2	2	2	2	0.636855	0.721802	Homo sapiens ankyrin repeat domain 13A (ANKRD13A), mRNA.
ILMN_1794070	ANKRD13B	0.200301	0.108434	0.138322	NA	80.3409	7.85801	82.6899	NA	0.971593	NA	-0.0415765	2	2	2	2	2	2	0.759643	0.753261	Homo sapiens ankyrin repeat domain 13B (ANKRD13B), mRNA.
ILMN_2148507	ANKRD13C	0	0	0.0602742	NA	265.567	11.3186	251.803	NA	1.05466	NA	0.0767798	2	2	2	2	2	2	0.615515	0.715836	Homo sapiens ankyrin repeat domain 13C (ANKRD13C), mRNA.
ILMN_1662902	ANKRD13D	0.268825	0.74247	0.018096	NA	74.6258	0.954896	65.6213	NA	1.13722	NA	0.18551	2	2	2	2	2	2	0.219351	0.50682	Homo sapiens ankyrin repeat domain 13 family, member D (ANKRD13D), mRNA. XM_945571
ILMN_2353431	ANKRD16	0.0128012	0.0060241	0.0644791	NA	103.444	4.71638	120.276	NA	0.860055	NA	-0.217498	2	2	2	2	2	2	0.155647	0.439561	Homo sapiens ankyrin repeat domain 16 (ANKRD16), transcript variant 2, mRNA.
ILMN_1675435	ANKRD16	0.293675	0.106928	0.00119999	NA	73.967	0.0627624	83.0681	NA	0.890438	NA	-0.167413	2	2	2	2	2	2	0.26502	0.546299	Homo sapiens ankyrin repeat domain 16 (ANKRD16), transcript variant 1, mRNA.
ILMN_1659156	ANKRD16	0.00150602	0.0060241	0.0199256	NA	141.106	1.98812	126.748	NA	1.11328	NA	0.154819	2	2	2	2	2	2	0.30266	0.575539	Homo sapiens ankyrin repeat domain 16 (ANKRD16), transcript variant 1, mRNA.
ILMN_1787064	ANKRD17	0.00753012	0.0165663	0.0318063	NA	109.739	2.46807	99.4397	NA	1.10357	NA	0.142182	2	2	2	2	2	2	0.344661	0.602349	Homo sapiens ankyrin repeat domain 17 (ANKRD17), transcript variant 1, mRNA.
ILMN_2406335	ANKRD17	0.000753012	0.0060241	0.112312	NA	151.777	12.0537	126.427	NA	1.20051	NA	0.26365	2	2	2	2	2	2	0.106278	0.366473	Homo sapiens ankyrin repeat domain 17 (ANKRD17), transcript variant 2, mRNA.
ILMN_1712019	ANKRD17	0	0	0.131714	NA	428.208	39.8816	326.57	NA	1.31123	NA	0.390917	2	2	2	2	2	2	0.0229029	0.155679	Homo sapiens ankyrin repeat domain 17 (ANKRD17), transcript variant 2, mRNA.
ILMN_1666221	ANKRD19	0.364458	0.0707831	0.0755475	NA	73.4658	3.92455	86.2138	NA	0.852136	NA	-0.230845	2	2	2	2	2	2	0.134487	0.410323	Homo sapiens ankyrin repeat domain 19 (ANKRD19), mRNA.
ILMN_1682547	ANKRD2	0.64759	0.316265	0.15174	NA	65.8802	7.0687	74.8482	NA	0.880184	NA	-0.184123	2	2	2	2	2	2	0.239136	0.524919	Homo sapiens ankyrin repeat domain 2 (stretch responsive muscle) (ANKRD2), transcript variant 1, mRNA.
ILMN_2215824	ANKRD20A1	0	0.00301205	0.0627625	NA	172.947	7.67534	150.827	NA	1.14666	NA	0.197434	2	2	2	2	2	2	0.201053	0.490519	Homo sapiens ankyrin repeat domain 20 family, member A1 (ANKRD20A1), mRNA.
ILMN_2289424	ANKRD20A3	0.705572	0.659639	0.0349342	NA	66.5848	1.64479	67.5357	NA	0.98592	NA	-0.0204581	2	2	2	2	2	2	0.888026	0.781473	Homo sapiens ankyrin repeat domain 20 family, member A3 (ANKRD20A3), mRNA.
ILMN_2398211	ANKRD20A3	0.064759	0.433735	0.0309748	NA	87.3229	1.91259	71.789	NA	1.21638	NA	0.282597	2	2	2	2	2	2	0.0688289	0.291631	Homo sapiens ankyrin repeat domain 20 family, member A3 (ANKRD20A3), mRNA.
ILMN_1680631	ANKRD20B	0.238705	0.179217	0.0570411	NA	76.0615	3.06787	78.7267	NA	0.966146	NA	-0.0496868	2	2	2	2	2	2	0.734171	0.747348	Homo sapiens ankyrin repeat domain 20B (ANKRD20B) on chromosome 2.
ILMN_1757147	ANKRD20B	0.768825	0.841867	0.105692	NA	63.8399	4.77109	63.4189	NA	1.00664	NA	0.00954538	2	2	2	2	2	2	0.971482	0.79738	Homo sapiens ankyrin repeat domain 20B (ANKRD20B) on chromosome 2.
ILMN_2181867	ANKRD20B	0.871235	0.932229	0.0199651	NA	62.6209	0.884049	60.3722	NA	1.03725	NA	0.0527612	2	2	2	2	2	2	0.722494	0.744551	Homo sapiens ankyrin repeat domain 20B (ANKRD20B) on chromosome 2.
ILMN_1671812	ANKRD21	0.366717	0.879518	0.0144113	NA	72.2983	0.736743	62.227	NA	1.16185	NA	0.216421	2	2	2	2	2	2	0.154498	0.437725	Homo sapiens ankyrin repeat domain 21 (ANKRD21), mRNA.
ILMN_2132599	ANKRD22	0.277108	0.311747	0.0479702	NA	74.8421	2.53865	74.9946	NA	0.997966	NA	-0.00293701	2	2	2	2	2	2	0.979828	0.798252	Homo sapiens ankyrin repeat domain 22 (ANKRD22), mRNA.
ILMN_2227338	ANKRD23	0.0180723	0.0346385	0.155705	NA	103.379	11.382	93.2921	NA	1.10812	NA	0.148117	2	2	2	2	2	2	0.391891	0.628615	Homo sapiens ankyrin repeat domain 23 (ANKRD23), mRNA.
ILMN_2101368	ANKRD24	0.243223	0.915663	0.238339	NA	84.7657	14.2857	61.1104	NA	1.38709	NA	0.472063	2	2	2	2	2	2	0.0187525	0.13886	Homo sapiens ankyrin repeat domain 24 (ANKRD24), mRNA.
ILMN_1740161	ANKRD26	0.0625	0.0662651	0.011885	NA	86.9825	0.731	87.5759	NA	0.993224	NA	-0.00980893	2	2	2	2	2	2	0.946802	0.791198	Homo sapiens ankyrin repeat domain 26 (ANKRD26), mRNA.
ILMN_1794063	ANKRD27	0.162651	0.143072	0.0254621	NA	78.7727	1.41826	80.4396	NA	0.979278	NA	-0.0302101	2	2	2	2	2	2	0.837175	0.771185	Homo sapiens ankyrin repeat domain 27 (VPS9 domain) (ANKRD27), mRNA.
ILMN_2232520	ANKRD28	0	0	0.0964387	NA	200.529	13.6746	192.78	NA	1.0402	NA	0.0568585	2	2	2	2	2	2	0.726945	0.745512	Homo sapiens ankyrin repeat domain 28 (ANKRD28), mRNA.
ILMN_2075643	ANKRD29	0.570783	0.825301	0.0237629	NA	68.8899	1.15755	63.7709	NA	1.08027	NA	0.111395	2	2	2	2	2	2	0.455902	0.655429	Homo sapiens ankyrin repeat domain 29 (ANKRD29), mRNA.
ILMN_1796059	ANKRD30A	0.608434	0.490964	0.0748578	NA	67.7839	3.58797	70.5892	NA	0.960259	NA	-0.058504	2	2	2	2	2	2	0.688925	0.736909	PREDICTED: Homo sapiens ankyrin repeat domain 30A (ANKRD30A), mRNA.
ILMN_1813607	ANKRD30A	0.374247	0.716867	0.0460505	NA	72.5052	2.36096	66.4045	NA	1.09187	NA	0.126804	2	2	2	2	2	2	0.401779	0.6334	PREDICTED: Homo sapiens ankyrin repeat domain 30A (ANKRD30A), mRNA.
ILMN_2214278	ANKRD32	0.00225904	0.0060241	0.135334	NA	143.33	13.716	132.293	NA	1.08343	NA	0.11561	2	2	2	2	2	2	0.492897	0.672623	Homo sapiens ankyrin repeat domain 32 (ANKRD32), mRNA.
ILMN_1667748	ANKRD33	0.000753012	0	0.0614137	NA	161.97	7.03373	240.008	NA	0.674853	NA	-0.567356	2	2	2	2	2	2	0.00109781	0.0219901	Homo sapiens ankyrin repeat domain 33 (ANKRD33), mRNA.
ILMN_2119793	ANKRD34A	0.0225904	0.0165663	0.036781	NA	96.3719	2.50645	100.038	NA	0.963354	NA	-0.0538624	2	2	2	2	2	2	0.714785	0.742953	Homo sapiens ankyrin repeat domain 34A (ANKRD34A), mRNA.
ILMN_1655766	ANKRD34B	0.773343	0.876506	0.0808274	NA	64.2874	3.67426	62.3749	NA	1.03066	NA	0.0435713	2	2	2	2	2	2	0.785673	0.759265	Homo sapiens ankyrin repeat domain 34B (ANKRD34B), mRNA.
ILMN_2145153	ANKRD35	0.167922	0.168675	0.0702428	NA	79.2073	3.93416	79.1229	NA	1.00107	NA	0.00153777	2	2	2	2	2	2	0.998706	0.800302	Homo sapiens ankyrin repeat domain 35 (ANKRD35), mRNA.
ILMN_2382431	ANKRD36	0.15512	0.123494	0.0057792	NA	78.9837	0.322768	81.7828	NA	0.965773	NA	-0.0502442	2	2	2	2	2	2	0.734067	0.747348	Homo sapiens ankyrin repeat domain 36 (ANKRD36), mRNA.
ILMN_2280568	ANKRD36	0.00753012	0.0150602	0.0302781	NA	112.204	2.40226	103.039	NA	1.08895	NA	0.122932	2	2	2	2	2	2	0.412382	0.638217	Homo sapiens ankyrin repeat domain 36 (ANKRD36), mRNA.
ILMN_1780806	ANKRD36B	0.00150602	0.00150602	0.0892274	NA	138.679	8.74974	166.64	NA	0.832208	NA	-0.264983	2	2	2	2	2	2	0.0905964	0.339395	Homo sapiens ankyrin repeat domain 36B (ANKRD36B), mRNA.
ILMN_2189614	ANKRD36B	0.0956325	0.0828313	0.0738203	NA	83.9355	4.38134	84.5731	NA	0.992461	NA	-0.0109174	2	2	2	2	2	2	0.931906	0.787996	Homo sapiens ankyrin repeat domain 36B (ANKRD36B), mRNA.
ILMN_1756417	ANKRD37	0.0128012	0.00451807	0.00756395	NA	101.92	0.545123	140.572	NA	0.72504	NA	-0.463867	2	2	2	2	2	2	0.00493035	0.0593766	Homo sapiens ankyrin repeat domain 37 (ANKRD37), mRNA.
ILMN_1776936	ANKRD38	0.313253	0.128012	0.216766	NA	80.9189	12.403	81.3731	NA	0.994419	NA	-0.00807475	2	2	2	2	2	2	0.884068	0.780522	Homo sapiens ankyrin repeat domain 38 (ANKRD38), mRNA.
ILMN_1710979	ANKRD39	0	0	0.00306114	NA	302.813	0.655455	371.049	NA	0.816101	NA	-0.29318	2	2	2	2	2	2	0.0587464	0.269097	Homo sapiens ankyrin repeat domain 39 (ANKRD39), mRNA.
ILMN_1758846	ANKRD40	0.0150602	0.0677711	0.0304201	NA	100.94	2.17125	87.1592	NA	1.15812	NA	0.211779	2	2	2	2	2	2	0.164668	0.451273	Homo sapiens ankyrin repeat domain 40 (ANKRD40), mRNA.
ILMN_2091590	ANKRD41	0.00828313	0.00451807	0.109518	NA	110.472	8.55509	140.443	NA	0.786597	NA	-0.346303	2	2	2	2	2	2	0.0329796	0.194764	Homo sapiens ankyrin repeat domain 41 (ANKRD41), mRNA.
ILMN_1676605	ANKRD42	0.637048	0.756024	0.0328409	NA	67.4862	1.56717	65.3847	NA	1.03214	NA	0.0456386	2	2	2	2	2	2	0.760568	0.75347	Homo sapiens ankyrin repeat domain 42 (ANKRD42), mRNA.
ILMN_1779882	ANKRD43	0.459337	0.539157	0.0143061	NA	70.5723	0.713903	69.6774	NA	1.01284	NA	0.018411	2	2	2	2	2	2	0.901283	0.783274	Homo sapiens ankyrin repeat domain 43 (ANKRD43), mRNA.
ILMN_2059844	ANKRD44	0.594127	0.128012	0.0371022	NA	68.3584	1.7934	81.2684	NA	0.841143	NA	-0.249577	2	2	2	2	2	2	0.10425	0.363579	Homo sapiens ankyrin repeat domain 44 (ANKRD44), mRNA.
ILMN_1733716	ANKRD45	0.783886	0.713855	0.0842503	NA	64.0659	3.81666	66.538	NA	0.962847	NA	-0.0546217	2	2	2	2	2	2	0.706759	0.741594	Homo sapiens ankyrin repeat domain 45 (ANKRD45), mRNA.
ILMN_1712298	ANKRD46	0	0	0.13607	NA	499.402	48.0505	453.061	NA	1.10228	NA	0.140495	2	2	2	2	2	2	0.401694	0.6334	Homo sapiens ankyrin repeat domain 46 (ANKRD46), mRNA.
ILMN_1755588	ANKRD47	0.15738	0.115964	0.0695824	NA	79.9484	3.93363	82.3278	NA	0.971099	NA	-0.0423098	2	2	2	2	2	2	0.769891	0.755201	Homo sapiens ankyrin repeat domain 47 (ANKRD47), mRNA.
ILMN_1669259	ANKRD49	0	0	0.0555011	NA	462.511	18.1513	327.71	NA	1.41134	NA	0.497067	2	2	2	2	2	2	0.00328644	0.0452692	Homo sapiens ankyrin repeat domain 49 (ANKRD49), mRNA.
ILMN_2367300	ANKRD5	0.600904	0.216867	0.0506481	NA	68.0466	2.43699	77.6237	NA	0.876621	NA	-0.189975	2	2	2	2	2	2	0.210259	0.498784	Homo sapiens ankyrin repeat domain 5 (ANKRD5), transcript variant 2, mRNA.
ILMN_1728957	ANKRD5	0.493976	0.364458	0.0475024	NA	70.1099	2.35494	73.4357	NA	0.95471	NA	-0.0668649	2	2	2	2	2	2	0.650521	0.72618	Homo sapiens ankyrin repeat domain 5 (ANKRD5), transcript variant 1, mRNA.
ILMN_1793466	ANKRD5	0.582831	0.823795	0.0541914	NA	68.4458	2.62278	63.8515	NA	1.07195	NA	0.100241	2	2	2	2	2	2	0.509176	0.678932	Homo sapiens ankyrin repeat domain 5 (ANKRD5), transcript variant 1, mRNA.
ILMN_2226304	ANKRD50	0	0	0.0983363	NA	216.22	15.0347	188.531	NA	1.14687	NA	0.197702	2	2	2	2	2	2	0.214346	0.501951	Homo sapiens ankyrin repeat domain 50 (ANKRD50), mRNA.
ILMN_1772660	ANKRD53	0.494729	0.612952	0.0726823	NA	70.2813	3.61205	68.3657	NA	1.02802	NA	0.0398689	2	2	2	2	2	2	0.801277	0.762778	Homo sapiens ankyrin repeat domain 53 (ANKRD53), mRNA.
ILMN_1766309	ANKRD54	0	0	0.0810135	NA	271.718	15.5654	271.409	NA	1.00114	NA	0.00164342	2	2	2	2	2	2	0.996166	0.800302	Homo sapiens ankyrin repeat domain 54 (ANKRD54), mRNA.
ILMN_2341724	ANKRD55	0.791416	0.346386	0.00983792	NA	64.7357	0.450331	73.9239	NA	0.875707	NA	-0.19148	2	2	2	2	2	2	0.20472	0.493757	Homo sapiens ankyrin repeat domain 55 (ANKRD55), transcript variant 2, mRNA.
ILMN_2072045	ANKRD56	0.408133	0.584337	0.044705	NA	71.7481	2.26804	68.8897	NA	1.04149	NA	0.0586532	2	2	2	2	2	2	0.697675	0.739275	Homo sapiens ankyrin repeat domain 56 (ANKRD56), mRNA.
ILMN_1724040	ANKRD57	0	0	0.0181037	NA	784.378	10.041	416.363	NA	1.88388	NA	0.913707	2	2	2	2	2	2	5.31546e-06	0.000508994	Homo sapiens ankyrin repeat domain 57 (ANKRD57), mRNA.
ILMN_2178587	ANKRD6	0.00376506	0.0060241	0.0734216	NA	125.265	6.50336	126.015	NA	0.994044	NA	-0.00861907	2	2	2	2	2	2	0.944127	0.790863	Homo sapiens ankyrin repeat domain 6 (ANKRD6), mRNA.
ILMN_2354930	ANKRD7	0.11747	0.0677711	0.0936558	NA	83.6311	5.53844	86.8014	NA	0.963476	NA	-0.0536799	2	2	2	2	2	2	0.710099	0.741973	Homo sapiens ankyrin repeat domain 7 (ANKRD7), transcript variant 1, mRNA.
ILMN_1779951	ANKRD7	0.408133	0.519578	0.0740579	NA	72.4272	3.79278	70.1922	NA	1.03184	NA	0.0452211	2	2	2	2	2	2	0.774565	0.756251	Homo sapiens ankyrin repeat domain 7 (ANKRD7), transcript variant 1, mRNA.
ILMN_2048607	ANKRD9	0	0	0.0701314	NA	806.962	40.0176	1066.57	NA	0.756599	NA	-0.402399	2	2	2	2	2	2	0.0135874	0.113887	Homo sapiens ankyrin repeat domain 9 (ANKRD9), mRNA.
ILMN_1813669	ANKS1A	0	0	0.140622	NA	333.133	33.125	472.887	NA	0.704465	NA	-0.5054	2	2	2	2	2	2	0.00402542	0.0516471	Homo sapiens ankyrin repeat and sterile alpha motif domain containing 1A (ANKS1A), mRNA.
ILMN_1696131	ANKS1B	0.559488	0.376506	0.142589	NA	69.3411	6.99136	73.203	NA	0.947244	NA	-0.0781917	2	2	2	2	2	2	0.591945	0.708495	Homo sapiens ankyrin repeat and sterile alpha motif domain containing 1B (ANKS1B), transcript variant 1, mRNA.
ILMN_2340974	ANKS1B	0.150602	0.191265	0.0964992	NA	81.0524	5.53063	78.1417	NA	1.03725	NA	0.0527608	2	2	2	2	2	2	0.747088	0.750549	Homo sapiens ankyrin repeat and sterile alpha motif domain containing 1B (ANKS1B), transcript variant 3, mRNA.
ILMN_1758392	ANKS1B	0.336596	0.480422	0.0891451	NA	74.1183	4.67205	70.8479	NA	1.04616	NA	0.0651038	2	2	2	2	2	2	0.683283	0.735692	Homo sapiens ankyrin repeat and sterile alpha motif domain containing 1B (ANKS1B), transcript variant 2, mRNA.
ILMN_1751636	ANKS3	0.00225904	0.00451807	0.103368	NA	143.389	10.4807	141.366	NA	1.01431	NA	0.0204994	2	2	2	2	2	2	0.913836	0.785512	Homo sapiens ankyrin repeat and sterile alpha motif domain containing 3 (ANKS3), mRNA.
ILMN_2199658	ANKS4B	0.328313	0.192771	0.0192403	NA	73.1912	0.995763	78.0842	NA	0.937338	NA	-0.0933592	2	2	2	2	2	2	0.529496	0.686029	Homo sapiens ankyrin repeat and sterile alpha motif domain containing 4B (ANKS4B), mRNA.
ILMN_1735108	ANKS6	0.726657	0.718373	0.0131626	NA	65.9376	0.613706	66.362	NA	0.993605	NA	-0.00925519	2	2	2	2	2	2	0.94973	0.792144	Homo sapiens ankyrin repeat and sterile alpha motif domain containing 6 (ANKS6), mRNA.
ILMN_2370692	ANKZF1	0.182982	0.0331325	0.135662	NA	81.543	7.82219	94.4295	NA	0.863533	NA	-0.211677	2	2	2	2	2	2	0.177516	0.466237	Homo sapiens ankyrin repeat and zinc finger domain containing 1 (ANKZF1), transcript variant 1, mRNA.
ILMN_1677487	ANKZF1	0	0	0.061091	NA	233.991	10.1079	241.048	NA	0.970723	NA	-0.0428688	2	2	2	2	2	2	0.768152	0.754855	Homo sapiens ankyrin repeat and zinc finger domain containing 1 (ANKZF1), transcript variant 2, mRNA.
ILMN_2273796	ANKZF1	0.100151	0.158133	0.0691114	NA	83.2658	4.06913	79.5431	NA	1.0468	NA	0.0659876	2	2	2	2	2	2	0.669952	0.732407	Homo sapiens ankyrin repeat and zinc finger domain containing 1 (ANKZF1), transcript variant 1, mRNA.
ILMN_1739645	ANLN	0	0.00150602	0.0608338	NA	197.716	8.50493	164.457	NA	1.20223	NA	0.265717	2	2	2	2	2	2	0.0897509	0.337839	Homo sapiens anillin, actin binding protein (ANLN), mRNA.
ILMN_1767111	ANO10	0	0	0.00229322	NA	283.726	0.460076	345.816	NA	0.820454	NA	-0.285506	2	2	2	2	2	2	0.0650434	0.283108	Homo sapiens anoctamin 10 (ANO10), mRNA.
ILMN_2228215	ANO4	0.246988	0.620482	0.0802132	NA	76.3552	4.33081	68.2605	NA	1.11859	NA	0.161675	2	2	2	2	2	2	0.29944	0.573423	Homo sapiens anoctamin 4 (ANO4), mRNA.
ILMN_1690154	ANO5	0.121235	0.343373	0.0268322	NA	80.7794	1.53264	74.0162	NA	1.09138	NA	0.126148	2	2	2	2	2	2	0.39984	0.632633	Homo sapiens anoctamin 5 (ANO5), mRNA.
ILMN_1674941	ANO6	0	0	0.103447	NA	324.673	23.7491	292.338	NA	1.11061	NA	0.151351	2	2	2	2	2	2	0.343262	0.601738	Homo sapiens anoctamin 6 (ANO6), mRNA.
ILMN_1732948	ANO7	0.558735	0.576807	0.232146	NA	67.8899	11.1443	69.1154	NA	0.982269	NA	-0.0258099	2	2	2	2	2	2	0.796582	0.761448	Homo sapiens anoctamin 7 (ANO7), transcript variant NGEP-S, mRNA.
ILMN_1683824	ANO7	0.0293675	0.0436747	0.0124528	NA	94.0546	0.828193	91.2899	NA	1.03028	NA	0.0430431	2	2	2	2	2	2	0.771381	0.755232	Homo sapiens anoctamin 7 (ANO7), transcript variant NGEP-L, mRNA.
ILMN_1675423	ANO7	0.58509	0.795181	0.041673	NA	68.4428	2.01682	64.3071	NA	1.06431	NA	0.0899199	2	2	2	2	2	2	0.550052	0.694237	Homo sapiens anoctamin 7 (ANO7), transcript variant NGEP-L, mRNA.
ILMN_1709124	ANO8	0	0	0.00141008	NA	320.688	0.319752	263.688	NA	1.21616	NA	0.282338	2	2	2	2	2	2	0.0678141	0.289834	Homo sapiens anoctamin 8 (ANO8), mRNA.
ILMN_1798679	ANO9	0.85241	0.418675	0.0741924	NA	62.1401	3.25999	72.0589	NA	0.862352	NA	-0.213651	2	2	2	2	2	2	0.163774	0.45027	Homo sapiens anoctamin 9 (ANO9), mRNA.
ILMN_1762629	ANO9	0.0662651	0.27259	0.0243071	NA	86.7959	1.49182	76.097	NA	1.14059	NA	0.189787	2	2	2	2	2	2	0.20999	0.498627	Homo sapiens anoctamin 9 (ANO9), mRNA.
ILMN_1807945	ANP32A	0.248494	0.0165663	0.108488	NA	77.3443	5.9333	102.055	NA	0.757865	NA	-0.399987	2	2	2	2	2	2	0.0156996	0.12495	Homo sapiens acidic (leucine-rich) nuclear phosphoprotein 32 family, member A (ANP32A), mRNA.
ILMN_1684293	ANP32B	0	0	0.0758394	NA	3694.13	198.104	1907.72	NA	1.93642	NA	0.953389	2	2	2	2	2	2	4.09934e-06	0.000424736	Homo sapiens acidic (leucine-rich) nuclear phosphoprotein 32 family, member B (ANP32B), mRNA.
ILMN_2151412	ANP32C	0.698795	0.808735	0.0815061	NA	66.0656	3.80759	64.0382	NA	1.03166	NA	0.0449654	2	2	2	2	2	2	0.778913	0.75737	Homo sapiens acidic (leucine-rich) nuclear phosphoprotein 32 family, member C (ANP32C), mRNA.
ILMN_1728191	ANP32D	0.600904	0.106928	0.00699375	NA	68.2545	0.337541	83.0906	NA	0.821447	NA	-0.283761	2	2	2	2	2	2	0.0665855	0.286775	Homo sapiens acidic (leucine-rich) nuclear phosphoprotein 32 family, member D (ANP32D), mRNA.
ILMN_1684923	ANP32E	0.305723	0.0677711	0.0671292	NA	74.4839	3.53556	87.2163	NA	0.854013	NA	-0.22767	2	2	2	2	2	2	0.138593	0.41561	Homo sapiens acidic (leucine-rich) nuclear phosphoprotein 32 family, member E (ANP32E), mRNA.
ILMN_1763837	ANPEP	0.315512	0.396084	0.0515418	NA	73.9256	2.69426	72.5864	NA	1.01845	NA	0.0263742	2	2	2	2	2	2	0.864794	0.777094	Homo sapiens alanyl (membrane) aminopeptidase (aminopeptidase N, aminopeptidase M, microsomal aminopeptidase, CD13, p150) (ANPEP), mRNA.
ILMN_1811877	ANTXR1	0.00150602	0.00301205	0.00205015	NA	136.159	0.197386	155.257	NA	0.876988	NA	-0.189371	2	2	2	2	2	2	0.209459	0.498271	Homo sapiens anthrax toxin receptor 1 (ANTXR1), transcript variant 3, mRNA.
ILMN_2387995	ANTXR1	0.00677711	0.0060241	0.169974	NA	118.24	14.2112	112.544	NA	1.05061	NA	0.071228	2	2	2	2	2	2	0.710955	0.742194	Homo sapiens anthrax toxin receptor 1 (ANTXR1), transcript variant 2, mRNA.
ILMN_1670379	ANTXR1	0	0	0.0456496	NA	332.794	10.7423	215.059	NA	1.54746	NA	0.629898	2	2	2	2	2	2	0.000406657	0.0109804	Homo sapiens anthrax toxin receptor 1 (ANTXR1), transcript variant 1, mRNA.
ILMN_1812926	ANTXR2	0.0225904	0.0165663	0.0172938	NA	96.7167	1.18271	101.329	NA	0.954478	NA	-0.0672158	2	2	2	2	2	2	0.649782	0.726027	Homo sapiens anthrax toxin receptor 2 (ANTXR2), mRNA.
ILMN_1668566	ANUBL1	0.570783	0.420181	0.0177303	NA	68.8852	0.863628	72.0184	NA	0.956495	NA	-0.064171	2	2	2	2	2	2	0.664544	0.730985	Homo sapiens AN1, ubiquitin-like, homolog (Xenopus laevis) (ANUBL1), mRNA.
ILMN_2184184	ANXA1	0	0	0.0685539	NA	285.429	13.8361	334.54	NA	0.853199	NA	-0.229045	2	2	2	2	2	2	0.136534	0.412865	Homo sapiens annexin A1 (ANXA1), mRNA.
ILMN_1699421	ANXA10	0.932982	0.971386	0.00901186	NA	60.3177	0.384365	57.0359	NA	1.05754	NA	0.080712	2	2	2	2	2	2	0.586466	0.706589	Homo sapiens annexin A10 (ANXA10), mRNA.
ILMN_1807003	ANXA11	0.145331	0.0993976	0.0461172	NA	79.9917	2.60851	83.5281	NA	0.957663	NA	-0.0624107	2	2	2	2	2	2	0.672099	0.732952	Homo sapiens annexin A11 (ANXA11), transcript variant c, mRNA.
ILMN_1685170	ANXA11	0.0135542	0.0105422	0.0931655	NA	104.934	6.91284	108.87	NA	0.963843	NA	-0.0531292	2	2	2	2	2	2	0.712842	0.742612	Homo sapiens annexin A11 (ANXA11), transcript variant a, mRNA.
ILMN_2380494	ANXA11	0.345633	0.427711	1.7119e-05	NA	72.7817	0.000881021	71.9129	NA	1.01208	NA	0.0173241	2	2	2	2	2	2	0.906635	0.784077	Homo sapiens annexin A11 (ANXA11), transcript variant a, mRNA.
ILMN_1737612	ANXA13	0.746988	0.728916	0.133899	NA	63.61	6.02267	66.152	NA	0.961575	NA	-0.0565294	2	2	2	2	2	2	0.69005	0.737051	Homo sapiens annexin A13 (ANXA13), transcript variant 2, mRNA.
ILMN_2412490	ANXA13	0.825301	0.945783	0.0499101	NA	63.364	2.23623	59.5315	NA	1.06438	NA	0.0900112	2	2	2	2	2	2	0.551993	0.69456	Homo sapiens annexin A13 (ANXA13), transcript variant 1, mRNA.
ILMN_1799243	ANXA13	0.464608	0.796687	0.0594371	NA	70.8078	2.97593	64.2737	NA	1.10166	NA	0.13968	2	2	2	2	2	2	0.360656	0.611366	Homo sapiens annexin A13 (ANXA13), transcript variant 1, mRNA.
ILMN_1755937	ANXA2	0	0	0.0174661	NA	355.121	4.38589	389.448	NA	0.911859	NA	-0.133117	2	2	2	2	2	2	0.372724	0.617544	Homo sapiens annexin A2 (ANXA2), transcript variant 2, mRNA.
ILMN_1711899	ANXA2	0	0	0.141335	NA	2484.65	248.314	2672.21	NA	0.929809	NA	-0.104994	2	2	2	2	2	2	0.482676	0.66829	Homo sapiens annexin A2 (ANXA2), transcript variant 2, mRNA.
ILMN_2409167	ANXA2	0	0	0	NA	12177.9	0	10717.5	NA	1.13626	NA	0.184292	2	2	2	2	2	2	0.221427	0.508322	Homo sapiens annexin A2 (ANXA2), transcript variant 1, mRNA.
ILMN_2041101	ANXA2P1	0	0	0.195689	NA	475.383	65.7802	392.419	NA	1.21142	NA	0.276693	2	2	2	2	2	2	0.130666	0.404319	Homo sapiens annexin A2 pseudogene 1 (ANXA2P1) on chromosome 4.
ILMN_1694548	ANXA3	0.646837	0.623494	0.091485	NA	66.9034	4.32796	68.2195	NA	0.980708	NA	-0.0281049	2	2	2	2	2	2	0.838266	0.771315	Homo sapiens annexin A3 (ANXA3), mRNA.
ILMN_1711408	ANXA4	0.662651	0.534639	0.0710681	NA	66.854	3.35959	69.8216	NA	0.957497	NA	-0.0626602	2	2	2	2	2	2	0.669208	0.732084	Homo sapiens annexin A4 (ANXA4), mRNA.
ILMN_1741003	ANXA5	0	0	0.0718427	NA	5471.8	277.97	3751.33	NA	1.45863	NA	0.544613	2	2	2	2	2	2	0.00171019	0.0294486	Homo sapiens annexin A5 (ANXA5), mRNA.
ILMN_1678612	ANXA6	0	0	0.189711	NA	243.46	32.6592	255.586	NA	0.952558	NA	-0.0701212	2	2	2	2	2	2	0.620052	0.717031	Homo sapiens annexin A6 (ANXA6), transcript variant 1, mRNA.
ILMN_2326591	ANXA6	0.00150602	0.00301205	0.152597	NA	138.324	14.9254	144.12	NA	0.959782	NA	-0.059222	2	2	2	2	2	2	0.674223	0.733485	Homo sapiens annexin A6 (ANXA6), transcript variant 2, mRNA.
ILMN_1662322	ANXA7	0.771837	0.825301	0.00489439	NA	65.1462	0.225462	63.7495	NA	1.02191	NA	0.0312679	2	2	2	2	2	2	0.832485	0.770625	Homo sapiens annexin A7 (ANXA7), transcript variant 2, mRNA.
ILMN_1703791	ANXA7	0	0	0.0524589	NA	1432.27	53.1286	865.427	NA	1.65498	NA	0.726816	2	2	2	2	2	2	9.48531e-05	0.00400427	Homo sapiens annexin A7 (ANXA7), transcript variant 2, mRNA.
ILMN_2095610	ANXA8	0.78238	0.558735	0.0518076	NA	64.7043	2.37034	69.3458	NA	0.933067	NA	-0.0999477	2	2	2	2	2	2	0.501474	0.676032	Homo sapiens annexin A8 (ANXA8), mRNA. XM_931361 XM_931369 XM_931374 XM_931375 XM_931378 XM_931383 XM_931388 XM_931391 XM_931399 XM_931404 XM_931411
ILMN_2186983	ANXA8L2	0.0828313	0.134036	0.07903	NA	85.5285	4.77956	80.9652	NA	1.05636	NA	0.0791031	2	2	2	2	2	2	0.612599	0.71496	Homo sapiens annexin A8-like 2 (ANXA8L2), mRNA.
ILMN_2217601	ANXA9	0.149849	0.123494	0.0617628	NA	79.9428	3.49133	81.7361	NA	0.97806	NA	-0.0320059	2	2	2	2	2	2	0.823839	0.768205	Homo sapiens annexin A9 (ANXA9), mRNA.
ILMN_1709820	AOAH	0.545934	0.700301	0.11155	NA	69.2821	5.46481	66.7408	NA	1.03808	NA	0.0539151	2	2	2	2	2	2	0.749736	0.751468	Homo sapiens acyloxyacyl hydrolase (neutrophil) (AOAH), mRNA.
ILMN_1741431	AOC2	0.240964	0.134036	0.0958303	NA	77.2295	5.23325	80.9754	NA	0.95374	NA	-0.0683313	2	2	2	2	2	2	0.640295	0.722813	Homo sapiens amine oxidase, copper containing 2 (retina-specific) (AOC2), transcript variant 1, mRNA.
ILMN_2405185	AOC2	0.61747	0.623494	0.0282592	NA	68.0242	1.35928	68.2045	NA	0.997356	NA	-0.00381885	2	2	2	2	2	2	0.977883	0.798022	Homo sapiens amine oxidase, copper containing 2 (retina-specific) (AOC2), transcript variant 1, mRNA.
ILMN_1799863	AOC2	0.0670181	0.168675	0.0236211	NA	86.7017	1.44814	78.9945	NA	1.09757	NA	0.134308	2	2	2	2	2	2	0.370104	0.616361	Homo sapiens amine oxidase, copper containing 2 (retina-specific) (AOC2), transcript variant 2, mRNA.
ILMN_1782086	AOC3	0.410392	0.0557229	0.0178109	NA	71.4159	0.899425	88.4571	NA	0.80735	NA	-0.308734	2	2	2	2	2	2	0.0477999	0.241158	Homo sapiens amine oxidase, copper containing 3 (vascular adhesion protein 1) (AOC3), mRNA.
ILMN_1813840	AOF2	0	0	0.00307812	NA	2661.53	5.79297	3049.15	NA	0.872875	NA	-0.196153	2	2	2	2	2	2	0.194275	0.484016	Homo sapiens amine oxidase (flavin containing) domain 2 (AOF2), transcript variant 2, mRNA.
ILMN_1767113	AOX1	0.356928	0.546687	0.14244	NA	75.3486	7.58913	69.5493	NA	1.08338	NA	0.115546	2	2	2	2	2	2	0.498841	0.674777	Homo sapiens aldehyde oxidase 1 (AOX1), mRNA.
ILMN_1781983	AP1B1	0	0	0.159153	NA	381.486	42.9317	561.262	NA	0.679693	NA	-0.557045	2	2	2	2	2	2	0.00215916	0.0345141	Homo sapiens adaptor-related protein complex 1, beta 1 subunit (AP1B1), transcript variant 2, mRNA.
ILMN_2387505	AP1B1	0.00677711	0.0060241	0.0426521	NA	112.682	3.39845	113.695	NA	0.991089	NA	-0.0129128	2	2	2	2	2	2	0.927313	0.787172	Homo sapiens adaptor-related protein complex 1, beta 1 subunit (AP1B1), transcript variant 2, mRNA.
ILMN_2399622	AP1G1	0	0	0.148405	NA	284.534	29.8585	299.265	NA	0.950774	NA	-0.0728253	2	2	2	2	2	2	0.614538	0.715724	Homo sapiens adaptor-related protein complex 1, gamma 1 subunit (AP1G1), transcript variant 2, mRNA.
ILMN_2276598	AP1G2	0.649096	0.652108	0.052329	NA	67.1931	2.48629	67.6685	NA	0.992975	NA	-0.0101705	2	2	2	2	2	2	0.940405	0.789917	Homo sapiens adaptor-related protein complex 1, gamma 2 subunit (AP1G2), transcript variant 2, mRNA.
ILMN_1754179	AP1G2	0	0	0.115439	NA	316.598	25.8432	282.22	NA	1.12181	NA	0.165831	2	2	2	2	2	2	0.30635	0.577409	Homo sapiens adaptor-related protein complex 1, gamma 2 subunit (AP1G2), mRNA.
ILMN_1805247	AP1GBP1	0.113705	0.0993976	0.0444855	NA	81.8879	2.57587	83.3643	NA	0.98229	NA	-0.025779	2	2	2	2	2	2	0.858763	0.775139	Homo sapiens AP1 gamma subunit binding protein 1 (AP1GBP1), transcript variant 1, mRNA.
ILMN_2415467	AP1GBP1	0.298946	0.899096	0.0346225	NA	73.9797	1.81116	61.7559	NA	1.19794	NA	0.260553	2	2	2	2	2	2	0.0917496	0.341212	Homo sapiens AP1 gamma subunit binding protein 1 (AP1GBP1), transcript variant 1, mRNA.
ILMN_1754738	AP1M1	0	0	0.0766223	NA	517.033	28.013	696.34	NA	0.742501	NA	-0.429535	2	2	2	2	2	2	0.00929019	0.0907343	Homo sapiens adaptor-related protein complex 1, mu 1 subunit (AP1M1), mRNA.
ILMN_1705861	AP1M2	0.0278614	0.0105422	0.00856005	NA	93.9872	0.568892	107.944	NA	0.870701	NA	-0.19975	2	2	2	2	2	2	0.186638	0.475636	Homo sapiens adaptor-related protein complex 1, mu 2 subunit (AP1M2), mRNA.
ILMN_1712806	AP1S1	0	0	0.0542987	NA	328.396	12.6087	361.951	NA	0.907292	NA	-0.140361	2	2	2	2	2	2	0.349461	0.605473	Homo sapiens adaptor-related protein complex 1, sigma 1 subunit (AP1S1), transcript variant 2, mRNA.
ILMN_2316173	AP1S1	0	0	0.196376	NA	360.209	50.0182	308.379	NA	1.16807	NA	0.22413	2	2	2	2	2	2	0.222164	0.509125	Homo sapiens adaptor-related protein complex 1, sigma 1 subunit (AP1S1), transcript variant 1, mRNA.
ILMN_2120273	AP1S2	0	0	0.0647123	NA	1251.05	57.2463	1917.5	NA	0.652439	NA	-0.616086	2	2	2	2	2	2	0.000524773	0.0132239	Homo sapiens adaptor-related protein complex 1, sigma 2 subunit (AP1S2), mRNA.
ILMN_1768610	AP1S3	0.649096	0.920181	0.143984	NA	66.0627	6.72599	60.8937	NA	1.08489	NA	0.117543	2	2	2	2	2	2	0.492316	0.672623	Homo sapiens adaptor-related protein complex 1, sigma 3 subunit (AP1S3), mRNA.
ILMN_1815306	AP2A1	0	0	0.201242	NA	178.311	25.3735	188.983	NA	0.943529	NA	-0.0838611	2	2	2	2	2	2	0.562764	0.6984	Homo sapiens adaptor-related protein complex 2, alpha 1 subunit (AP2A1), transcript variant 2, mRNA.
ILMN_2359211	AP2A1	0.0128012	0.0060241	0.431857	NA	135.014	41.229	130.947	NA	1.03106	NA	0.0441215	2	2	2	2	2	2	0.910537	0.784989	Homo sapiens adaptor-related protein complex 2, alpha 1 subunit (AP2A1), transcript variant 2, mRNA.
ILMN_1673108	AP2A1	0.487199	0.590361	0.141971	NA	71.514	7.17917	68.8036	NA	1.03939	NA	0.0557411	2	2	2	2	2	2	0.760815	0.753566	Homo sapiens adaptor-related protein complex 2, alpha 1 subunit (AP2A1), transcript variant 1, mRNA.
ILMN_1803779	AP2A2	0	0	0.188299	NA	178.383	23.7512	173.873	NA	1.02594	NA	0.0369405	2	2	2	2	2	2	0.885598	0.781063	Homo sapiens adaptor-related protein complex 2, alpha 2 subunit (AP2A2), mRNA.
ILMN_1681998	AP2B1	0	0	0.00132871	NA	237.627	0.223261	303.915	NA	0.781889	NA	-0.354964	2	2	2	2	2	2	0.0249493	0.164625	Homo sapiens adaptor-related protein complex 2, beta 1 subunit (AP2B1), transcript variant 2, mRNA.
ILMN_2331735	AP2B1	0	0	0.000892212	NA	250.95	0.158322	268.766	NA	0.933711	NA	-0.0989515	2	2	2	2	2	2	0.505406	0.677857	Homo sapiens adaptor-related protein complex 2, beta 1 subunit (AP2B1), transcript variant 2, mRNA.
ILMN_2402798	AP2M1	0	0	0.0292413	NA	3502.49	72.4201	3867.22	NA	0.905688	NA	-0.142914	2	2	2	2	2	2	0.339733	0.59928	Homo sapiens adaptor-related protein complex 2, mu 1 subunit (AP2M1), transcript variant 1, mRNA.
ILMN_1699598	AP2M1	0	0	0.020605	NA	4246.98	61.8781	3996.23	NA	1.06275	NA	0.0877978	2	2	2	2	2	2	0.555391	0.695294	Homo sapiens adaptor-related protein complex 2, mu 1 subunit (AP2M1), transcript variant 1, mRNA.
ILMN_1662426	AP2S1	0	0	0.0311884	NA	3424.67	75.526	4248.3	NA	0.806125	NA	-0.310924	2	2	2	2	2	2	0.0467456	0.237789	Homo sapiens adaptor-related protein complex 2, sigma 1 subunit (AP2S1), transcript variant AP17, mRNA.
ILMN_1809957	AP2S1	0	0	0.0466642	NA	11734.2	387.19	11754.9	NA	0.998241	NA	-0.00254039	2	2	2	2	2	2	0.982182	0.798646	Homo sapiens adaptor-related protein complex 2, sigma 1 subunit (AP2S1), transcript variant AP17, mRNA.
ILMN_1768867	AP3B1	0	0	0.0395872	NA	3539.6	99.0817	2946.44	NA	1.20131	NA	0.264612	2	2	2	2	2	2	0.0877199	0.332842	Homo sapiens adaptor-related protein complex 3, beta 1 subunit (AP3B1), mRNA.
ILMN_1679256	AP3B2	0.199548	0.576807	0.0426216	NA	77.3849	2.33223	69.1288	NA	1.11943	NA	0.162765	2	2	2	2	2	2	0.283237	0.561051	Homo sapiens adaptor-related protein complex 3, beta 2 subunit (AP3B2), mRNA.
ILMN_1764945	AP3D1	0	0	0.0372969	NA	844.675	22.2765	842.706	NA	1.00234	NA	0.00336555	2	2	2	2	2	2	0.984613	0.79901	Homo sapiens adaptor-related protein complex 3, delta 1 subunit (AP3D1), transcript variant 2, mRNA.
ILMN_2390114	AP3D1	0	0	0.0709891	NA	854.551	42.8958	845.363	NA	1.01087	NA	0.0155958	2	2	2	2	2	2	0.927103	0.787091	Homo sapiens adaptor-related protein complex 3, delta 1 subunit (AP3D1), transcript variant 1, mRNA.
ILMN_2284667	AP3D1	0.229669	0.489458	0.0574665	NA	76.3862	3.10395	70.6774	NA	1.08077	NA	0.112062	2	2	2	2	2	2	0.461829	0.658831	Homo sapiens adaptor-related protein complex 3, delta 1 subunit (AP3D1), transcript variant 1, mRNA.
ILMN_1701774	AP3M1	0.424699	0.23494	0.0546672	NA	71.6838	2.77098	76.9033	NA	0.932129	NA	-0.101398	2	2	2	2	2	2	0.495456	0.6741	Homo sapiens adaptor-related protein complex 3, mu 1 subunit (AP3M1), transcript variant 1, mRNA.
ILMN_1667086	AP3M1	0	0	0.0463836	NA	1100.44	36.0924	814.649	NA	1.35082	NA	0.433832	2	2	2	2	2	2	0.00831359	0.0844272	Homo sapiens adaptor-related protein complex 3, mu 1 subunit (AP3M1), transcript variant 1, mRNA.
ILMN_2362122	AP3M1	0	0	0.150114	NA	864.303	91.743	634.281	NA	1.36265	NA	0.446416	2	2	2	2	2	2	0.0121787	0.10583	Homo sapiens adaptor-related protein complex 3, mu 1 subunit (AP3M1), transcript variant 2, mRNA.
ILMN_1676946	AP3M2	0	0	0.00524043	NA	722.616	2.67768	402.369	NA	1.7959	NA	0.84471	2	2	2	2	2	2	1.41992e-05	0.000964476	Homo sapiens adaptor-related protein complex 3, mu 2 subunit (AP3M2), mRNA.
ILMN_2311761	AP3S1	0	0	0.00858488	NA	960.775	5.83231	1009.66	NA	0.951585	NA	-0.0715958	2	2	2	2	2	2	0.628881	0.71983	Homo sapiens adaptor-related protein complex 3, sigma 1 subunit (AP3S1), transcript variant 2, mRNA.
ILMN_1731596	AP3S2	0	0	0.105375	NA	181.588	13.5304	221.119	NA	0.821226	NA	-0.284149	2	2	2	2	2	2	0.0732569	0.301225	Homo sapiens adaptor-related protein complex 3, sigma 2 subunit (AP3S2), mRNA.
ILMN_1669377	AP4B1	0	0	0.128052	NA	563.863	51.0557	748.056	NA	0.753771	NA	-0.407802	2	2	2	2	2	2	0.0150964	0.121603	Homo sapiens adaptor-related protein complex 4, beta 1 subunit (AP4B1), mRNA.
ILMN_1754531	AP4E1	0	0	0.0136968	NA	479.208	4.64118	422.387	NA	1.13452	NA	0.182088	2	2	2	2	2	2	0.227275	0.513568	Homo sapiens adaptor-related protein complex 4, epsilon 1 subunit (AP4E1), mRNA.
ILMN_1779512	AP4M1	0.0993976	0.0768072	0.00566742	NA	82.3348	0.329954	85.5516	NA	0.962399	NA	-0.0552934	2	2	2	2	2	2	0.708606	0.741876	Homo sapiens adaptor-related protein complex 4, mu 1 subunit (AP4M1), mRNA.
ILMN_1760466	AP4S1	0.0158133	0.135542	0.054925	NA	99.5189	3.8651	80.8943	NA	1.23023	NA	0.298932	2	2	2	2	2	2	0.0577865	0.266619	Homo sapiens adaptor-related protein complex 4, sigma 1 subunit (AP4S1), mRNA.
ILMN_1659463	APAF1	0	0	0.0135498	NA	172.706	1.65473	195.385	NA	0.883928	NA	-0.178	2	2	2	2	2	2	0.237138	0.523287	Homo sapiens apoptotic peptidase activating factor 1 (APAF1), transcript variant 1, mRNA.
ILMN_2344798	APAF1	0.125753	0.0406627	0.149589	NA	84.9477	8.98536	91.9295	NA	0.924052	NA	-0.113954	2	2	2	2	2	2	0.44933	0.653097	Homo sapiens apoptotic peptidase activating factor 1 (APAF1), transcript variant 5, mRNA.
ILMN_2182656	APBA1	0.585843	0.631024	0.0640551	NA	68.2728	3.09233	68.0155	NA	1.00378	NA	0.00544691	2	2	2	2	2	2	0.978913	0.798189	Homo sapiens amyloid beta (A4) precursor protein-binding, family A, member 1 (X11) (APBA1), mRNA.
ILMN_1723626	APBA2	0.386295	0.0993976	0.104936	NA	73.2828	5.43763	83.5528	NA	0.877084	NA	-0.189213	2	2	2	2	2	2	0.218789	0.506113	Homo sapiens amyloid beta (A4) precursor protein-binding, family A, member 2 (X11-like) (APBA2), mRNA.
ILMN_2364928	APBA2BP	0.0572289	0.0451807	0.0634554	NA	88.241	3.95935	90.0062	NA	0.980388	NA	-0.0285749	2	2	2	2	2	2	0.841396	0.772297	Homo sapiens amyloid beta (A4) precursor protein-binding, family A, member 2 binding protein (APBA2BP), transcript variant 2, mRNA.
ILMN_2270491	APBA2BP	0.866717	0.945783	0.0931453	NA	61.1633	4.02844	59.6577	NA	1.02524	NA	0.0359568	2	2	2	2	2	2	0.829811	0.769929	Homo sapiens amyloid beta (A4) precursor protein-binding, family A, member 2 binding protein (APBA2BP), transcript variant 2, mRNA.
ILMN_1686610	APBA3	0	0	0.00551298	NA	330.331	1.28772	298.564	NA	1.1064	NA	0.145868	2	2	2	2	2	2	0.329632	0.593589	Homo sapiens amyloid beta (A4) precursor protein-binding, family A, member 3 (APBA3), mRNA.
ILMN_1769918	APBB1	0.534639	0.167169	0.00287581	NA	69.4022	0.14113	79.2651	NA	0.875571	NA	-0.191704	2	2	2	2	2	2	0.204136	0.493503	Homo sapiens amyloid beta (A4) precursor protein-binding, family B, member 1 (Fe65) (APBB1), transcript variant 2, mRNA.
ILMN_1796271	APBB1	0.150602	0.412651	0.0209868	NA	79.4157	1.17852	72.0964	NA	1.10152	NA	0.139496	2	2	2	2	2	2	0.351925	0.60691	Homo sapiens amyloid beta (A4) precursor protein-binding, family B, member 1 (Fe65) (APBB1), transcript variant 2, mRNA.
ILMN_1699646	APBB1	0.246235	0.953313	0.209954	NA	82.8254	12.2963	59.0354	NA	1.40298	NA	0.488494	2	2	2	2	2	2	0.0116669	0.103448	Homo sapiens amyloid beta (A4) precursor protein-binding, family B, member 1 (Fe65) (APBB1), transcript variant 1, mRNA.
ILMN_1801710	APBB1IP	0.0346386	0.064759	0.011131	NA	92.8749	0.731	87.6986	NA	1.05902	NA	0.0827356	2	2	2	2	2	2	0.577322	0.702681	Homo sapiens amyloid beta (A4) precursor protein-binding, family B, member 1 interacting protein (APBB1IP), mRNA.
ILMN_1716790	APBB2	0.00828313	0.0677711	0.00625697	NA	106.7	0.472077	86.4141	NA	1.23475	NA	0.304218	2	2	2	2	2	2	0.0506806	0.248824	Homo sapiens amyloid beta (A4) precursor protein-binding, family B, member 2 (Fe65-like) (APBB2), mRNA.
ILMN_1740772	APBB3	0	0	0.196637	NA	812.735	113.005	698.674	NA	1.16325	NA	0.218167	2	2	2	2	2	2	0.235275	0.521217	Homo sapiens amyloid beta (A4) precursor protein-binding, family B, member 3 (APBB3), transcript variant 3, mRNA.
ILMN_2320513	APBB3	0	0	0.00296104	NA	361.949	0.757838	294.473	NA	1.22914	NA	0.297648	2	2	2	2	2	2	0.0553406	0.260141	Homo sapiens amyloid beta (A4) precursor protein-binding, family B, member 3 (APBB3), transcript variant 2, mRNA.
ILMN_1662668	APC	0.286145	0.0768072	0.0586848	NA	74.9341	3.1095	85.3974	NA	0.877475	NA	-0.18857	2	2	2	2	2	2	0.21423	0.501904	Homo sapiens adenomatous polyposis coli (APC), mRNA.
ILMN_1659950	APC2	0.231175	0.804217	0.124128	NA	78.7227	6.90966	64.1202	NA	1.22774	NA	0.296001	2	2	2	2	2	2	0.0752516	0.306093	Homo sapiens adenomatosis polyposis coli 2 (APC2), mRNA.
ILMN_1656951	APCDD1	0.00376506	0.0165663	0.0344331	NA	119.827	2.91754	102.278	NA	1.17158	NA	0.22846	2	2	2	2	2	2	0.135953	0.411851	Homo sapiens adenomatosis polyposis coli down-regulated 1 (APCDD1), mRNA.
ILMN_1689431	APCDD1L	0.167169	0.0436747	0.106048	NA	80.6365	6.04671	91.3967	NA	0.882269	NA	-0.180709	2	2	2	2	2	2	0.239113	0.524919	Homo sapiens adenomatosis polyposis coli down-regulated 1-like (APCDD1L), mRNA.
ILMN_1708833	APCS	0.00527108	0.0060241	0.0123242	NA	116.833	1.01814	113.802	NA	1.02663	NA	0.0379158	2	2	2	2	2	2	0.797961	0.761801	Homo sapiens amyloid P component, serum (APCS), mRNA.
ILMN_1718023	APEH	0	0	0.0679997	NA	1620.11	77.9	1682.44	NA	0.962954	NA	-0.054462	2	2	2	2	2	2	0.709362	0.741898	Homo sapiens N-acylaminoacyl-peptide hydrolase (APEH), mRNA.
ILMN_2319344	APEX1	0	0	0.0372289	NA	2165.91	57.0172	2540.41	NA	0.852583	NA	-0.230088	2	2	2	2	2	2	0.132153	0.407059	Homo sapiens APEX nuclease (multifunctional DNA repair enzyme) 1 (APEX1), transcript variant 1, mRNA.
ILMN_1661886	APEX1	0	0	0.0318638	NA	4386.43	98.8312	4609.5	NA	0.951607	NA	-0.071562	2	2	2	2	2	2	0.628672	0.71983	Homo sapiens APEX nuclease (multifunctional DNA repair enzyme) 1 (APEX1), transcript variant 3, mRNA.
ILMN_1652505	APEX2	0	0	0.0672023	NA	1207.03	57.3573	1261.81	NA	0.956585	NA	-0.0640343	2	2	2	2	2	2	0.662916	0.730621	Homo sapiens APEX nuclease (apurinic/apyrimidinic endonuclease) 2 (APEX2), nuclear gene encoding mitochondrial protein, mRNA.
ILMN_2398388	APH1A	0.0135542	0.00451807	0.109016	NA	105.966	8.16853	141.299	NA	0.749942	NA	-0.415148	2	2	2	2	2	2	0.0126921	0.108751	Homo sapiens anterior pharynx defective 1 homolog A (C. elegans) (APH1A), transcript variant 1, mRNA.
ILMN_1658472	APH1A	0	0	0.0566648	NA	2436.92	97.6426	2346.66	NA	1.03846	NA	0.0544471	2	2	2	2	2	2	0.721999	0.74442	Homo sapiens anterior pharynx defective 1 homolog A (C. elegans) (APH1A), transcript variant 1, mRNA.
ILMN_1767816	APH1B	0.000753012	0	0.170913	NA	151.953	18.3641	172.759	NA	0.879569	NA	-0.185131	2	2	2	2	2	2	0.240711	0.52637	Homo sapiens anterior pharynx defective 1 homolog B (C. elegans) (APH1B), mRNA.
ILMN_1815051	API5	0	0	0.150178	NA	1214.81	129.003	1187.93	NA	1.02263	NA	0.0322802	2	2	2	2	2	2	0.880461	0.780522	Homo sapiens apoptosis inhibitor 5 (API5), mRNA.
ILMN_2128293	APIP	0	0	0.093791	NA	190.057	12.6046	241.639	NA	0.786532	NA	-0.346423	2	2	2	2	2	2	0.0316612	0.189323	Homo sapiens APAF1 interacting protein (APIP), mRNA.
ILMN_1793360	APITD1	0	0	0.0694315	NA	780.614	38.3246	741.922	NA	1.05215	NA	0.0733412	2	2	2	2	2	2	0.635129	0.721485	Homo sapiens apoptosis-inducing, TAF9-like domain 1 (APITD1), transcript variant B, mRNA.
ILMN_1788135	APITD1	0.0248494	0.0783133	0.0825766	NA	97.4007	5.68727	85.2001	NA	1.1432	NA	0.193077	2	2	2	2	2	2	0.217959	0.504801	Homo sapiens apoptosis-inducing, TAF9-like domain 1 (APITD1), transcript variant B, mRNA.
ILMN_1808597	APLF	0.714608	0.77259	0.0580979	NA	66.0673	2.71414	64.7826	NA	1.01983	NA	0.02833	2	2	2	2	2	2	0.856263	0.774413	Homo sapiens aprataxin and PNKP like factor (APLF), mRNA.
ILMN_1689353	APLN	0.486446	0.305723	0.0910499	NA	70.5904	4.54475	75.2095	NA	0.938583	NA	-0.091443	2	2	2	2	2	2	0.537521	0.689786	Homo sapiens apelin (APLN), mRNA.
ILMN_1700183	APLNR	0.14006	0.0768072	0.00979055	NA	79.7044	0.55179	85.5489	NA	0.931682	NA	-0.102091	2	2	2	2	2	2	0.492177	0.672623	Homo sapiens apelin receptor (APLNR), mRNA.
ILMN_2396198	APLP1	0.104669	0.0753012	0.149204	NA	87.2972	9.2101	85.6116	NA	1.01969	NA	0.0281283	2	2	2	2	2	2	0.900306	0.783274	Homo sapiens amyloid beta (A4) precursor-like protein 1 (APLP1), transcript variant 2, mRNA.
ILMN_1763834	APLP1	0.0120482	0.0557229	0.0365869	NA	103.181	2.66937	88.3694	NA	1.16761	NA	0.223553	2	2	2	2	2	2	0.144404	0.424862	Homo sapiens amyloid beta (A4) precursor-like protein 1 (APLP1), transcript variant 1, mRNA.
ILMN_2081465	APLP2	0.338855	0.411145	0.127698	NA	75.3945	6.80783	72.1731	NA	1.04463	NA	0.0629974	2	2	2	2	2	2	0.716294	0.743392	Homo sapiens amyloid beta (A4) precursor-like protein 2 (APLP2), mRNA.
ILMN_1690884	APOA1	0.545181	0.444277	0.0185381	NA	69.1947	0.90703	71.6174	NA	0.966171	NA	-0.0496501	2	2	2	2	2	2	0.73682	0.747816	Homo sapiens apolipoprotein A-I (APOA1), mRNA.
ILMN_1729533	APOA1BP	0	0	0.0112556	NA	1504.73	11.976	1175.97	NA	1.27957	NA	0.355659	2	2	2	2	2	2	0.0247797	0.163832	Homo sapiens apolipoprotein A-I binding protein (APOA1BP), mRNA.
ILMN_1688543	APOA2	0.0775602	0.0527108	0.0774134	NA	86.1225	4.71431	88.9584	NA	0.968122	NA	-0.0467396	2	2	2	2	2	2	0.746534	0.750333	Homo sapiens apolipoprotein A-II (APOA2), mRNA.
ILMN_1675706	APOA4	0.600151	0.903614	0.100733	NA	68.0077	4.84411	61.6313	NA	1.10346	NA	0.142035	2	2	2	2	2	2	0.372291	0.617138	Homo sapiens apolipoprotein A-IV (APOA4), mRNA.
ILMN_1754055	APOA5	0.808735	0.737952	0.0269951	NA	64.1542	1.2246	65.7696	NA	0.975439	NA	-0.035877	2	2	2	2	2	2	0.807367	0.764055	Homo sapiens apolipoprotein A-V (APOA5), mRNA.
ILMN_1664024	APOB	0.705572	0.263554	0.0640641	NA	66.1286	2.99564	76.2124	NA	0.867688	NA	-0.204752	2	2	2	2	2	2	0.179803	0.46886	Homo sapiens apolipoprotein B (including Ag(x) antigen) (APOB), mRNA.
ILMN_1697925	APOB48R	0.375753	0.608434	0.000447103	NA	72.0016	0.0227633	68.417	NA	1.05239	NA	0.0736753	2	2	2	2	2	2	0.619045	0.716787	Homo sapiens apolipoprotein B48 receptor (APOB48R), mRNA.
ILMN_1813881	APOBEC1	0.601657	0.703313	0.0538481	NA	68.0798	2.59223	66.673	NA	1.0211	NA	0.0301242	2	2	2	2	2	2	0.845701	0.773126	Homo sapiens apolipoprotein B mRNA editing enzyme, catalytic polypeptide 1 (APOBEC1), mRNA.
ILMN_1719143	APOBEC2	0.551205	0.231928	0.00454218	NA	69.0967	0.221925	76.9815	NA	0.897575	NA	-0.155895	2	2	2	2	2	2	0.298263	0.572501	Homo sapiens apolipoprotein B mRNA editing enzyme, catalytic polypeptide-like 2 (APOBEC2), mRNA.
ILMN_1680192	APOBEC3A	0.806476	0.971386	0.0740711	NA	63.6728	3.33494	57.2134	NA	1.1129	NA	0.154325	2	2	2	2	2	2	0.318933	0.586321	Homo sapiens apolipoprotein B mRNA editing enzyme, catalytic polypeptide-like 3A (APOBEC3A), mRNA.
ILMN_2219466	APOBEC3B	0.000753012	0.0105422	0.0381937	NA	145.095	3.91858	110.832	NA	1.30914	NA	0.388616	2	2	2	2	2	2	0.0159214	0.126191	Homo sapiens apolipoprotein B mRNA editing enzyme, catalytic polypeptide-like 3B (APOBEC3B), mRNA.
ILMN_1675684	APOBEC3C	0.197289	0.21988	0.0412187	NA	77.2324	2.25102	77.4869	NA	0.996715	NA	-0.00474767	2	2	2	2	2	2	0.971234	0.79738	Homo sapiens apolipoprotein B mRNA editing enzyme, catalytic polypeptide-like 3C (APOBEC3C), mRNA.
ILMN_1661572	APOBEC3D	0.338102	0.801205	0.107152	NA	74.9363	5.67777	64.1465	NA	1.16821	NA	0.224294	2	2	2	2	2	2	0.16428	0.451006	Homo sapiens apolipoprotein B mRNA editing enzyme, catalytic polypeptide-like 3D (putative) (APOBEC3D), mRNA.
ILMN_1710726	APOBEC3F	0.0579819	0.0707831	0.0137149	NA	87.9334	0.852767	86.0751	NA	1.02159	NA	0.0308161	2	2	2	2	2	2	0.835284	0.77113	Homo sapiens apolipoprotein B mRNA editing enzyme, catalytic polypeptide-like 3F (APOBEC3F), transcript variant 1, mRNA.
ILMN_2296950	APOBEC3F	0.0225904	0.0677711	0.0194446	NA	96.1281	1.32171	87.0769	NA	1.10394	NA	0.142668	2	2	2	2	2	2	0.34114	0.600019	Homo sapiens apolipoprotein B mRNA editing enzyme, catalytic polypeptide-like 3F (APOBEC3F), transcript variant 2, mRNA.
ILMN_2412172	APOBEC3F	0.063253	0.346386	0.0416986	NA	87.358	2.57578	73.7441	NA	1.18461	NA	0.244412	2	2	2	2	2	2	0.113114	0.378739	Homo sapiens apolipoprotein B mRNA editing enzyme, catalytic polypeptide-like 3F (APOBEC3F), transcript variant 2, mRNA.
ILMN_2232478	APOBEC3G	0.00451807	0.00301205	0.113129	NA	122.535	9.80209	151.373	NA	0.80949	NA	-0.304915	2	2	2	2	2	2	0.0572181	0.265157	Homo sapiens apolipoprotein B mRNA editing enzyme, catalytic polypeptide-like 3G (APOBEC3G), mRNA.
ILMN_1664828	APOBEC3H	0.953313	0.914157	0.0194024	NA	58.9991	0.809443	61.334	NA	0.961933	NA	-0.0559924	2	2	2	2	2	2	0.704862	0.741133	Homo sapiens apolipoprotein B mRNA editing enzyme, catalytic polypeptide-like 3H (APOBEC3H), mRNA.
ILMN_1815425	APOBEC4	0.709337	0.718373	0.0211938	NA	66.234	0.992602	66.3595	NA	0.998109	NA	-0.00273054	2	2	2	2	2	2	0.984401	0.79901	Homo sapiens apolipoprotein B mRNA editing enzyme, catalytic polypeptide-like 4 (putative) (APOBEC4), mRNA.
ILMN_1789007	APOC1	0	0	0.206786	NA	384.117	56.1654	525.323	NA	0.731201	NA	-0.451659	2	2	2	2	2	2	0.0121755	0.10583	Homo sapiens apolipoprotein C-I (APOC1), mRNA.
ILMN_1802923	APOC2	0.115211	0.13253	0.0891061	NA	83.638	5.26982	81.0557	NA	1.03186	NA	0.0452437	2	2	2	2	2	2	0.780902	0.75801	Homo sapiens apolipoprotein C-II (APOC2), mRNA.
ILMN_1722070	APOC3	0.635542	0.75753	0.149848	NA	66.344	7.02972	65.3104	NA	1.01583	NA	0.022654	2	2	2	2	2	2	0.927819	0.787224	Homo sapiens apolipoprotein C-III (APOC3), mRNA.
ILMN_1765605	APOC4	0.403614	0.490964	0.0708277	NA	72.5383	3.63292	70.555	NA	1.02811	NA	0.0399949	2	2	2	2	2	2	0.799944	0.76264	Homo sapiens apolipoprotein C-IV (APOC4), mRNA.
ILMN_1780170	APOD	0.833584	0.625	0.0380545	NA	63.3928	1.70581	68.1624	NA	0.930025	NA	-0.104658	2	2	2	2	2	2	0.481752	0.668041	Homo sapiens apolipoprotein D (APOD), mRNA.
ILMN_1740938	APOE	0	0	0.0276292	NA	7995.81	156.213	8060.41	NA	0.991985	NA	-0.0116093	2	2	2	2	2	2	0.936055	0.788854	Homo sapiens apolipoprotein E (APOE), mRNA.
ILMN_1809311	APOF	0.368976	0.730422	0.0478608	NA	72.7212	2.46108	65.9968	NA	1.10189	NA	0.139979	2	2	2	2	2	2	0.355903	0.60859	Homo sapiens apolipoprotein F (APOF), mRNA.
ILMN_1761511	APOH	0.895331	0.444277	0.0333232	NA	61.7336	1.45463	71.5995	NA	0.862206	NA	-0.213895	2	2	2	2	2	2	0.159618	0.444493	Homo sapiens apolipoprotein H (beta-2-glycoprotein I) (APOH), mRNA.
ILMN_1761793	APOL1	0.0677711	0.0165663	0.16815	NA	91.8176	10.9171	102.028	NA	0.899925	NA	-0.152123	2	2	2	2	2	2	0.326203	0.592039	Homo sapiens apolipoprotein L, 1 (APOL1), transcript variant 2, mRNA.
ILMN_1688631	APOL1	0.809488	0.582831	0.0815692	NA	63.4328	3.65869	68.9876	NA	0.919481	NA	-0.121108	2	2	2	2	2	2	0.418941	0.640537	Homo sapiens apolipoprotein L, 1 (APOL1), transcript variant 2, mRNA.
ILMN_2325337	APOL2	0.438253	0.0105422	0.207212	NA	75.299	11.0329	110.591	NA	0.680878	NA	-0.554532	2	2	2	2	2	2	0.00315314	0.0444076	Homo sapiens apolipoprotein L, 2 (APOL2), transcript variant beta, mRNA.
ILMN_2248822	APOL2	0.41491	0.269578	0.071644	NA	71.8851	3.64169	76.1296	NA	0.944246	NA	-0.0827654	2	2	2	2	2	2	0.575838	0.701796	Homo sapiens apolipoprotein L, 2 (APOL2), transcript variant beta, mRNA.
ILMN_1706582	APOL2	0.0775602	0.218373	0.083879	NA	85.9731	5.09919	77.506	NA	1.10924	NA	0.149578	2	2	2	2	2	2	0.338367	0.598492	Homo sapiens apolipoprotein L, 2 (APOL2), transcript variant alpha, mRNA.
ILMN_2369144	APOL3	0.283133	0.0316265	0.0948025	NA	75.8236	5.08288	94.6657	NA	0.800962	NA	-0.320195	2	2	2	2	2	2	0.0451355	0.233452	Homo sapiens apolipoprotein L, 3 (APOL3), transcript variant beta/a, mRNA.
ILMN_2283195	APOL3	0.939006	0.935241	0.0144772	NA	60.039	0.614616	59.9644	NA	1.00124	NA	0.00179261	2	2	2	2	2	2	0.990731	0.799885	Homo sapiens apolipoprotein L, 3 (APOL3), transcript variant alpha/a, mRNA.
ILMN_1756862	APOL3	0.362952	0.552711	0.0721334	NA	73.4272	3.74523	69.4144	NA	1.05781	NA	0.0810801	2	2	2	2	2	2	0.600425	0.710415	Homo sapiens apolipoprotein L, 3 (APOL3), transcript variant beta/a, mRNA.
ILMN_1779070	APOL4	0.548193	0.463855	0.183046	NA	69.0897	8.94249	71.2339	NA	0.9699	NA	-0.044092	2	2	2	2	2	2	0.734993	0.747488	Homo sapiens apolipoprotein L, 4 (APOL4), transcript variant a, mRNA.
ILMN_1704682	APOL4	0.207078	0.21988	0.0685741	NA	77.4375	3.75488	77.4193	NA	1.00024	NA	0.000339527	2	2	2	2	2	2	0.992791	0.80012	Homo sapiens apolipoprotein L, 4 (APOL4), transcript variant b, mRNA.
ILMN_1676177	APOL5	0.481175	0.191265	0.057429	NA	70.4647	2.86146	78.2029	NA	0.901049	NA	-0.150323	2	2	2	2	2	2	0.31762	0.585606	Homo sapiens apolipoprotein L, 5 (APOL5), mRNA.
ILMN_1687201	APOL6	0.439006	0.427711	0.0576324	NA	71.4383	2.91127	71.8931	NA	0.993673	NA	-0.00915624	2	2	2	2	2	2	0.944812	0.790945	Homo sapiens apolipoprotein L, 6 (APOL6), mRNA.
ILMN_1723522	APOLD1	0.0911145	0.129518	0.0579649	NA	84.158	3.44941	81.1496	NA	1.03707	NA	0.0525168	2	2	2	2	2	2	0.732057	0.746672	Homo sapiens apolipoprotein L domain containing 1 (APOLD1), mRNA.
ILMN_1731941	APOM	0.0188253	0.0481928	0.044474	NA	99.7218	3.13604	89.741	NA	1.11122	NA	0.152142	2	2	2	2	2	2	0.315512	0.58408	Homo sapiens apolipoprotein M (APOM), mRNA.
ILMN_1721623	APOO	0	0	0.00722623	NA	326.534	1.66849	352.196	NA	0.927136	NA	-0.109147	2	2	2	2	2	2	0.463151	0.659349	Homo sapiens apolipoprotein O (APOO), mRNA.
ILMN_1777483	APOOL	0	0.0060241	0.226909	NA	191.627	30.7463	131.297	NA	1.45948	NA	0.545459	2	2	2	2	2	2	0.00667861	0.0725527	Homo sapiens apolipoprotein O-like (APOOL), mRNA.
ILMN_1653283	APP	0	0	0.131463	NA	400.637	37.2426	424.857	NA	0.942991	NA	-0.0846848	2	2	2	2	2	2	0.565024	0.698854	Homo sapiens amyloid beta (A4) precursor protein (APP), transcript variant 1, mRNA.
ILMN_2404063	APP	0	0	0.0265499	NA	4153.16	77.97	3418.16	NA	1.21503	NA	0.280992	2	2	2	2	2	2	0.0699495	0.293654	Homo sapiens amyloid beta (A4) precursor protein (APP), transcript variant 3, mRNA.
ILMN_2404065	APP	0	0	0.103376	NA	5554.25	406.004	4474.38	NA	1.24135	NA	0.311905	2	2	2	2	2	2	0.0566088	0.26364	Homo sapiens amyloid beta (A4) precursor protein (APP), transcript variant 3, mRNA.
ILMN_2149766	APPBP2	0	0	0.00588765	NA	214.119	0.891418	259.28	NA	0.82582	NA	-0.276101	2	2	2	2	2	2	0.0735994	0.302001	Homo sapiens amyloid beta precursor protein (cytoplasmic tail) binding protein 2 (APPBP2), mRNA.
ILMN_1763730	APPL1	0.00301205	0.0060241	0.0095682	NA	124.657	0.843394	128.679	NA	0.968741	NA	-0.0458166	2	2	2	2	2	2	0.756603	0.753173	Homo sapiens adaptor protein, phosphotyrosine interaction, PH domain and leucine zipper containing 1 (APPL1), mRNA.
ILMN_1765076	APPL2	0	0	0.0199539	NA	386.229	5.44951	204.804	NA	1.88585	NA	0.915212	2	2	2	2	2	2	5.22303e-06	0.000502595	Homo sapiens adaptor protein, phosphotyrosine interaction, PH domain and leucine zipper containing 2 (APPL2), mRNA.
ILMN_1726410	APRT	0	0	0.0926154	NA	997.737	65.3408	1161.35	NA	0.859118	NA	-0.219072	2	2	2	2	2	2	0.156456	0.440549	Homo sapiens adenine phosphoribosyltransferase (APRT), transcript variant 1, mRNA.
ILMN_1722491	APRT	0	0	0.016823	NA	2352.63	27.9861	2398.98	NA	0.980682	NA	-0.0281421	2	2	2	2	2	2	0.84857	0.773446	Homo sapiens adenine phosphoribosyltransferase (APRT), transcript variant 1, mRNA.
ILMN_2317348	APTX	0	0	0.200215	NA	398.556	56.4248	617.52	NA	0.645413	NA	-0.631705	2	2	2	2	2	2	0.00104994	0.0213582	Homo sapiens aprataxin (APTX), transcript variant 2, mRNA.
ILMN_1726752	APTX	0	0	0.200965	NA	195.798	27.8236	288.791	NA	0.67799	NA	-0.560664	2	2	2	2	2	2	0.00277183	0.0407578	Homo sapiens aprataxin (APTX), transcript variant 5, mRNA.
ILMN_2260058	APTX	0.748494	0.870482	0.0914227	NA	64.7284	4.18441	62.5665	NA	1.03455	NA	0.0490083	2	2	2	2	2	2	0.763153	0.753566	Homo sapiens aprataxin (APTX), transcript variant 4, mRNA.
ILMN_1776857	AQP1	0.0692771	0.0436747	0.076981	NA	86.4483	4.70571	91.2107	NA	0.947787	NA	-0.0773658	2	2	2	2	2	2	0.600012	0.710362	Homo sapiens aquaporin 1 (Colton blood group) (AQP1), mRNA.
ILMN_1681103	AQP1	0.108434	0.13253	0.00201801	NA	81.5979	0.116436	80.9946	NA	1.00745	NA	0.0107074	2	2	2	2	2	2	0.942215	0.790433	Homo sapiens aquaporin 1 (Colton blood group) (AQP1), mRNA.
ILMN_2090004	AQP10	0.676958	0.939759	0.0199936	NA	66.7577	0.943793	59.8589	NA	1.11525	NA	0.157368	2	2	2	2	2	2	0.294995	0.569886	Homo sapiens aquaporin 10 (AQP10), mRNA.
ILMN_1762606	AQP11	0.0188253	0	0.0434607	NA	97.8407	3.00678	188.595	NA	0.518788	NA	-0.946784	2	2	2	2	2	2	3.56414e-06	0.000388693	Homo sapiens aquaporin 11 (AQP11), mRNA.
ILMN_1757036	AQP12A	0.503012	0.317771	0.0138753	NA	69.9411	0.686216	74.7614	NA	0.935524	NA	-0.0961536	2	2	2	2	2	2	0.517389	0.682146	Homo sapiens aquaporin 12A (AQP12A), mRNA.
ILMN_1732149	AQP2	0.214608	0.114458	0.0657464	NA	77.4063	3.59859	82.3893	NA	0.939518	NA	-0.0900073	2	2	2	2	2	2	0.543975	0.69241	Homo sapiens aquaporin 2 (collecting duct) (AQP2), mRNA.
ILMN_1651574	AQP3	0.800452	0.0572289	0.149934	NA	61.8028	6.5523	88.2915	NA	0.699986	NA	-0.514602	2	2	2	2	2	2	0.00372403	0.0488008	Homo sapiens aquaporin 3 (Gill blood group) (AQP3), mRNA.
ILMN_1676649	AQP4	0.393072	0.302711	0.0532517	NA	72.119	2.71561	75.4105	NA	0.956352	NA	-0.0643858	2	2	2	2	2	2	0.662139	0.730519	Homo sapiens aquaporin 4 (AQP4), transcript variant a, mRNA.
ILMN_1747683	AQP4	0.754518	0.935241	0.0173724	NA	65.2976	0.802127	59.9334	NA	1.0895	NA	0.123671	2	2	2	2	2	2	0.407695	0.635897	Homo sapiens aquaporin 4 (AQP4), transcript variant a, mRNA.
ILMN_1807036	AQP5	0.463102	0.230422	0.0218551	NA	70.5515	1.09029	77.1495	NA	0.914477	NA	-0.128981	2	2	2	2	2	2	0.387529	0.625465	Homo sapiens aquaporin 5 (AQP5), mRNA.
ILMN_1786381	AQP6	0.00150602	0.0060241	0.153249	NA	135.774	14.713	129.614	NA	1.04753	NA	0.0669858	2	2	2	2	2	2	0.716486	0.743396	Homo sapiens aquaporin 6, kidney specific (AQP6), mRNA.
ILMN_1738494	AQP7	0.515813	0.871988	0.100641	NA	70.1041	4.98888	62.4687	NA	1.12223	NA	0.166366	2	2	2	2	2	2	0.296039	0.570233	Homo sapiens aquaporin 7 (AQP7), mRNA.
ILMN_2053902	AQP7P2	0.765813	0.0496988	0.0319163	NA	65.097	1.46913	89.649	NA	0.726132	NA	-0.461697	2	2	2	2	2	2	0.00520529	0.0613679	Homo sapiens aquaporin 7 pseudogene 2 (AQP7P2), non-coding RNA.
ILMN_1713462	AQP8	0.734187	0.968373	0.0270231	NA	65.9452	1.26009	57.5419	NA	1.14604	NA	0.196653	2	2	2	2	2	2	0.194961	0.484686	Homo sapiens aquaporin 8 (AQP8), mRNA.
ILMN_1715068	AQP9	0.484187	0.810241	0.0866569	NA	70.6276	4.32776	63.9891	NA	1.10374	NA	0.142407	2	2	2	2	2	2	0.363293	0.612568	Homo sapiens aquaporin 9 (AQP9), mRNA.
ILMN_2177460	AQR	0.16491	0.21988	0.0932283	NA	80.1567	5.28412	77.4775	NA	1.03458	NA	0.0490462	2	2	2	2	2	2	0.763846	0.753566	Homo sapiens aquarius homolog (mouse) (AQR), mRNA.
ILMN_1792540	AR	0.59488	0.673193	0.0171437	NA	68.4747	0.830077	67.2011	NA	1.01895	NA	0.0270851	2	2	2	2	2	2	0.855276	0.774274	Homo sapiens androgen receptor (AR), transcript variant 2, mRNA.
ILMN_1659572	AR	0.459337	0.784639	0.063477	NA	71.1421	3.19321	64.4871	NA	1.1032	NA	0.141693	2	2	2	2	2	2	0.355355	0.608276	Homo sapiens androgen receptor (AR), transcript variant 1, mRNA.
ILMN_1767351	AR	0.00451807	0.0331325	0.102722	NA	115.429	8.38423	93.9544	NA	1.22856	NA	0.296972	2	2	2	2	2	2	0.0683076	0.29074	Homo sapiens androgen receptor (AR), transcript variant 2, mRNA.
ILMN_1658883	ARAF	0	0	0.114293	NA	381.573	30.8377	564.99	NA	0.675362	NA	-0.566267	2	2	2	2	2	2	0.00142344	0.0260414	Homo sapiens v-raf murine sarcoma 3611 viral oncogene homolog (ARAF), mRNA.
ILMN_1767541	ARAP2	0.0316265	0.0225904	0.00533195	NA	93.6887	0.353231	98.5327	NA	0.950839	NA	-0.072727	2	2	2	2	2	2	0.623524	0.717505	Homo sapiens ArfGAP with RhoGAP domain, ankyrin repeat and PH domain 2 (ARAP2), mRNA.
ILMN_1812618	ARAP3	0	0	0.0545276	NA	199.066	7.67537	237.643	NA	0.83767	NA	-0.255545	2	2	2	2	2	2	0.0979896	0.352462	Homo sapiens ArfGAP with RhoGAP domain, ankyrin repeat and PH domain 3 (ARAP3), mRNA.
ILMN_1711120	ARC	0.0730422	0.152108	0.0858588	NA	87.3396	5.30251	80.0536	NA	1.09101	NA	0.12567	2	2	2	2	2	2	0.422031	0.641816	Homo sapiens activity-regulated cytoskeleton-associated protein (ARC), mRNA.
ILMN_1699703	ARCN1	0	0	0.128537	NA	2350.98	213.679	1926.7	NA	1.22021	NA	0.287132	2	2	2	2	2	2	0.0853732	0.328564	Homo sapiens archain 1 (ARCN1), mRNA.
ILMN_1721977	ARD1A	0	0	0.178498	NA	567.575	71.6376	720.69	NA	0.787544	NA	-0.344567	2	2	2	2	2	2	0.0416653	0.223409	Homo sapiens ARD1 homolog A, N-acetyltransferase (S. cerevisiae) (ARD1A), mRNA.
ILMN_1804421	AREG	0.536145	0.46988	0.0465876	NA	69.3414	2.28427	71.1597	NA	0.974448	NA	-0.0373428	2	2	2	2	2	2	0.79812	0.761842	Homo sapiens amphiregulin (AREG), mRNA.
ILMN_1802203	ARF1	0	0	0.0780005	NA	2121.42	117.006	2526.96	NA	0.839515	NA	-0.252371	2	2	2	2	2	2	0.104257	0.363579	Homo sapiens ADP-ribosylation factor 1 (ARF1), transcript variant 1, mRNA.
ILMN_1661458	ARF1	0.0504518	0.0150602	0.101934	NA	91.0674	6.56399	104.957	NA	0.867667	NA	-0.204787	2	2	2	2	2	2	0.184853	0.473735	Homo sapiens ADP-ribosylation factor 1 (ARF1), transcript variant 3, mRNA.
ILMN_2330948	ARF1	0	0	0.0475003	NA	419.194	14.0798	473.227	NA	0.885822	NA	-0.174912	2	2	2	2	2	2	0.246766	0.531732	Homo sapiens ADP-ribosylation factor 1 (ARF1), transcript variant 2, mRNA.
ILMN_1682938	ARF3	0	0	0.19195	NA	199.967	27.1413	441.462	NA	0.452965	NA	-1.14253	2	2	2	2	2	2	1.22301e-06	0.000183266	Homo sapiens ADP-ribosylation factor 3 (ARF3), mRNA.
ILMN_1723884	ARF4	0	0	0.0656748	NA	621.166	28.8464	656.912	NA	0.945586	NA	-0.0807191	2	2	2	2	2	2	0.585218	0.706126	Homo sapiens ADP-ribosylation factor 4 (ARF4), mRNA.
ILMN_1719518	ARF4	0	0	0.0119743	NA	2941.59	24.9066	2738.48	NA	1.07417	NA	0.103216	2	2	2	2	2	2	0.487917	0.67077	Homo sapiens ADP-ribosylation factor 4 (ARF4), mRNA.
ILMN_1752340	ARF5	0	0	0.0781473	NA	1474.49	81.4782	1671.42	NA	0.882178	NA	-0.180859	2	2	2	2	2	2	0.234813	0.521009	Homo sapiens ADP-ribosylation factor 5 (ARF5), mRNA.
ILMN_1764297	ARF6	0.0481928	0.381024	0.0861068	NA	90.5012	5.51032	73.0049	NA	1.23966	NA	0.309945	2	2	2	2	2	2	0.0545158	0.258464	Homo sapiens ADP-ribosylation factor 6 (ARF6), mRNA.
ILMN_1675709	ARFGAP1	0	0	0.0404514	NA	672.883	19.2468	619.443	NA	1.08627	NA	0.119384	2	2	2	2	2	2	0.428054	0.644731	Homo sapiens ADP-ribosylation factor GTPase activating protein 1 (ARFGAP1), transcript variant 1, mRNA.
ILMN_2406873	ARFGAP1	0.00903615	0.123494	0.249519	NA	119.233	21.037	81.9065	NA	1.45572	NA	0.541728	2	2	2	2	2	2	0.00896535	0.0888339	Homo sapiens ADP-ribosylation factor GTPase activating protein 1 (ARFGAP1), transcript variant 2, mRNA.
ILMN_1769250	ARFGAP2	0	0	0.111986	NA	212.448	16.8229	323.68	NA	0.656351	NA	-0.60746	2	2	2	2	2	2	0.00076006	0.0169934	Homo sapiens ADP-ribosylation factor GTPase activating protein 2 (ARFGAP2), mRNA.
ILMN_2227800	ARFGAP3	0.365964	0.207831	0.17521	NA	76.9298	9.53103	77.8098	NA	0.98869	NA	-0.0164093	2	2	2	2	2	2	0.866989	0.777442	Homo sapiens ADP-ribosylation factor GTPase activating protein 3 (ARFGAP3), mRNA.
ILMN_2221408	ARFGEF1	0.216867	0.46988	0.0636792	NA	76.9648	3.46557	71.1557	NA	1.08164	NA	0.113218	2	2	2	2	2	2	0.459579	0.65789	Homo sapiens ADP-ribosylation factor guanine nucleotide-exchange factor 1(brefeldin A-inhibited) (ARFGEF1), mRNA.
ILMN_1789990	ARFGEF2	0	0	0.0184379	NA	277.316	3.61552	283.139	NA	0.979434	NA	-0.0299803	2	2	2	2	2	2	0.838782	0.771548	Homo sapiens ADP-ribosylation factor guanine nucleotide-exchange factor 2 (brefeldin A-inhibited) (ARFGEF2), mRNA.
ILMN_2403906	ARFIP1	0	0	0.0427245	NA	260.885	7.88154	260.125	NA	1.00292	NA	0.00421033	2	2	2	2	2	2	0.980948	0.798514	Homo sapiens ADP-ribosylation factor interacting protein 1 (ARFIP1), transcript variant 2, mRNA.
ILMN_1768399	ARFIP1	0.0361446	0.0768072	0.116271	NA	94.8015	7.7942	85.3069	NA	1.1113	NA	0.152247	2	2	2	2	2	2	0.348417	0.604945	Homo sapiens ADP-ribosylation factor interacting protein 1 (ARFIP1), transcript variant 1, mRNA.
ILMN_1750690	ARFIP2	0.125753	0.0677711	0.038991	NA	80.6621	2.22392	86.6088	NA	0.931339	NA	-0.102622	2	2	2	2	2	2	0.490175	0.672128	Homo sapiens ADP-ribosylation factor interacting protein 2 (ARFIP2), mRNA.
ILMN_1703989	ARFRP1	0.000753012	0	0.0559682	NA	160.462	6.35035	172.06	NA	0.932592	NA	-0.100682	2	2	2	2	2	2	0.498452	0.674576	Homo sapiens ADP-ribosylation factor related protein 1 (ARFRP1), mRNA.
ILMN_1812281	ARG1	0.185994	0.805723	0.0746426	NA	78.4665	4.14148	64.1061	NA	1.22401	NA	0.291614	2	2	2	2	2	2	0.0667705	0.287288	Homo sapiens arginase, liver (ARG1), mRNA.
ILMN_1800898	ARG2	0	0	0.0580442	NA	214.712	8.8125	210.695	NA	1.01906	NA	0.0272459	2	2	2	2	2	2	0.861932	0.776046	Homo sapiens arginase, type II (ARG2), nuclear gene encoding mitochondrial protein, mRNA.
ILMN_1716068	ARGFX	0.722139	0.917169	0.123706	NA	64.5545	5.64681	60.9944	NA	1.05837	NA	0.081842	2	2	2	2	2	2	0.626464	0.718796	Homo sapiens arginine-fifty homeobox (ARGFX), mRNA.
ILMN_2095571	ARGFXP2	0.707078	0.34488	0.0599211	NA	66.2226	2.80589	73.972	NA	0.895239	NA	-0.159655	2	2	2	2	2	2	0.289751	0.567129	Homo sapiens arginine-fifty homeobox pseudogene 2 (ARGFXP2), non-coding RNA.
ILMN_1788468	ARGLU1	0	0	0.0412473	NA	1408.19	41.0718	1666.48	NA	0.84501	NA	-0.242959	2	2	2	2	2	2	0.113358	0.379046	Homo sapiens arginine and glutamate rich 1 (ARGLU1), mRNA.
ILMN_1732060	ARHGAP1	0	0	0.0344397	NA	1397.81	34.0402	1814.15	NA	0.770504	NA	-0.376125	2	2	2	2	2	2	0.0187237	0.138698	Homo sapiens Rho GTPase activating protein 1 (ARHGAP1), mRNA.
ILMN_1736112	ARHGAP10	0.0527108	0.0677711	0.0286643	NA	88.6644	1.79711	86.7382	NA	1.02221	NA	0.0316882	2	2	2	2	2	2	0.832297	0.770598	Homo sapiens Rho GTPase activating protein 10 (ARHGAP10), mRNA.
ILMN_2395913	ARHGAP11A	0.0143072	0.0150602	0.080567	NA	101.305	5.77131	104.867	NA	0.966032	NA	-0.0498572	2	2	2	2	2	2	0.730617	0.746453	Homo sapiens Rho GTPase activating protein 11A (ARHGAP11A), transcript variant 2, mRNA.
ILMN_1744830	ARHGAP11A	0.00225904	0.0060241	0.114076	NA	128.301	10.3492	127.889	NA	1.00322	NA	0.00464123	2	2	2	2	2	2	0.999652	0.800302	Homo sapiens Rho GTPase activating protein 11A (ARHGAP11A), transcript variant 1, mRNA.
ILMN_1673815	ARHGAP11A	0.0060241	0.0210843	0.125311	NA	118.667	10.5149	99.0164	NA	1.19846	NA	0.261183	2	2	2	2	2	2	0.114552	0.380746	Homo sapiens Rho GTPase activating protein 11A (ARHGAP11A), transcript variant 2, mRNA.
ILMN_2215881	ARHGAP11B	0.00225904	0.0060241	0.115538	NA	146.475	11.9666	120.393	NA	1.21664	NA	0.282902	2	2	2	2	2	2	0.0853286	0.328564	Homo sapiens Rho GTPase activating protein 11B (ARHGAP11B), mRNA. XM_931045 XM_931050
ILMN_2101810	ARHGAP12	0.920934	0.942771	0.0868145	NA	59.6369	3.66094	59.7297	NA	0.998446	NA	-0.00224418	2	2	2	2	2	2	0.973922	0.797545	Homo sapiens Rho GTPase activating protein 12 (ARHGAP12), mRNA.
ILMN_2208413	ARHGAP15	0.219127	0.561747	0.013074	NA	76.329	0.70564	69.3186	NA	1.10113	NA	0.13899	2	2	2	2	2	2	0.352817	0.606953	Homo sapiens Rho GTPase activating protein 15 (ARHGAP15), mRNA.
ILMN_1718610	ARHGAP17	0	0	0.0299706	NA	1173.73	24.8741	1287.15	NA	0.911883	NA	-0.133079	2	2	2	2	2	2	0.373183	0.617975	Homo sapiens Rho GTPase activating protein 17 (ARHGAP17), transcript variant 2, mRNA.
ILMN_1756693	ARHGAP17	0.295934	0.688253	0.0355629	NA	74.087	1.86305	66.8841	NA	1.10769	NA	0.147557	2	2	2	2	2	2	0.327883	0.593175	Homo sapiens Rho GTPase activating protein 17 (ARHGAP17), transcript variant 1, mRNA.
ILMN_2398847	ARHGAP17	0	0.00150602	0.118811	NA	196.797	16.5333	165.939	NA	1.18595	NA	0.246049	2	2	2	2	2	2	0.133261	0.409042	Homo sapiens Rho GTPase activating protein 17 (ARHGAP17), transcript variant 2, mRNA.
ILMN_1791186	ARHGAP18	0.494729	0.447289	0.0725936	NA	70.2824	3.60769	71.45	NA	0.983657	NA	-0.023772	2	2	2	2	2	2	0.864756	0.777094	Homo sapiens Rho GTPase activating protein 18 (ARHGAP18), mRNA.
ILMN_1688953	ARHGAP19	0	0	0.114364	NA	421.26	34.0663	761.65	NA	0.553089	NA	-0.854417	2	2	2	2	2	2	2.09187e-05	0.00129132	Homo sapiens Rho GTPase activating protein 19 (ARHGAP19), mRNA.
ILMN_1782761	ARHGAP20	0.371235	0.945783	0.0373636	NA	72.4146	1.9132	59.668	NA	1.21362	NA	0.279322	2	2	2	2	2	2	0.0724189	0.299536	Homo sapiens Rho GTPase activating protein 20 (ARHGAP20), mRNA.
ILMN_1811592	ARHGAP21	0	0	0.0669345	NA	276.789	13.1004	269.862	NA	1.02567	NA	0.0365654	2	2	2	2	2	2	0.816193	0.766751	Homo sapiens Rho GTPase activating protein 21 (ARHGAP21), mRNA.
ILMN_1676361	ARHGAP22	0	0	0.0426221	NA	295.487	8.90552	261.26	NA	1.13101	NA	0.177612	2	2	2	2	2	2	0.242825	0.527992	Homo sapiens Rho GTPase activating protein 22 (ARHGAP22), mRNA.
ILMN_1765876	ARHGAP24	0.298946	0.0572289	0.137879	NA	77.2937	7.53575	88.2745	NA	0.875607	NA	-0.191645	2	2	2	2	2	2	0.219172	0.506701	Homo sapiens Rho GTPase activating protein 24 (ARHGAP24), transcript variant 1, mRNA.
ILMN_1775441	ARHGAP24	0.61747	0.332831	0.0227568	NA	67.998	1.09419	74.4162	NA	0.913753	NA	-0.130124	2	2	2	2	2	2	0.383447	0.623051	Homo sapiens Rho GTPase activating protein 24 (ARHGAP24), transcript variant 2, mRNA.
ILMN_2352633	ARHGAP24	0.384036	0.584337	0.144088	NA	74.6914	7.60998	68.8747	NA	1.08445	NA	0.116968	2	2	2	2	2	2	0.49464	0.673871	Homo sapiens Rho GTPase activating protein 24 (ARHGAP24), transcript variant 3, mRNA.
ILMN_1801833	ARHGAP24	0.0112952	0.0542169	0.0566596	NA	103.976	4.16573	88.5503	NA	1.1742	NA	0.23168	2	2	2	2	2	2	0.134812	0.410739	Homo sapiens Rho GTPase activating protein 24 (ARHGAP24), transcript variant 2, mRNA.
ILMN_1661971	ARHGAP25	0.823042	0.402108	0.0110664	NA	63.9399	0.500338	72.4236	NA	0.88286	NA	-0.179743	2	2	2	2	2	2	0.232694	0.519538	Homo sapiens Rho GTPase activating protein 25 (ARHGAP25), transcript variant 2, mRNA.
ILMN_1658853	ARHGAP25	0.670934	0.76506	0.0455376	NA	67.018	2.15798	64.9949	NA	1.03113	NA	0.0442234	2	2	2	2	2	2	0.770518	0.755201	Homo sapiens Rho GTPase activating protein 25 (ARHGAP25), transcript variant 1, mRNA.
ILMN_1777998	ARHGAP25	0.0768072	0.225904	0.0329955	NA	85.123	1.98604	77.2561	NA	1.10183	NA	0.139901	2	2	2	2	2	2	0.352529	0.606953	Homo sapiens Rho GTPase activating protein 25 (ARHGAP25), transcript variant 2, mRNA.
ILMN_1711490	ARHGAP26	0.109187	0.0768072	0.0322516	NA	81.9992	1.87002	85.2142	NA	0.962272	NA	-0.0554838	2	2	2	2	2	2	0.706922	0.741594	Homo sapiens Rho GTPase activating protein 26 (ARHGAP26), mRNA.
ILMN_2103362	ARHGAP27	0.323795	0.245482	0.0394543	NA	73.4563	2.04931	76.4604	NA	0.96071	NA	-0.0578273	2	2	2	2	2	2	0.694929	0.738435	Homo sapiens Rho GTPase activating protein 27 (ARHGAP27), mRNA.
ILMN_1731178	ARHGAP28	0.662651	0.582831	0.042972	NA	67.169	2.04098	68.9494	NA	0.974178	NA	-0.0377428	2	2	2	2	2	2	0.79641	0.761434	Homo sapiens Rho GTPase activating protein 28 (ARHGAP28), transcript variant 2, mRNA.
ILMN_2290204	ARHGAP28	0.338855	0.310241	0.056487	NA	73.5151	2.93636	75.0458	NA	0.979603	NA	-0.0297306	2	2	2	2	2	2	0.836445	0.771173	Homo sapiens Rho GTPase activating protein 28 (ARHGAP28), transcript variant 1, mRNA.
ILMN_1797753	ARHGAP28	0.146837	0.162651	0.0593475	NA	80.4582	3.37643	79.3318	NA	1.0142	NA	0.0203405	2	2	2	2	2	2	0.898657	0.783028	Homo sapiens Rho GTPase activating protein 28 (ARHGAP28), transcript variant 2, mRNA.
ILMN_1751474	ARHGAP29	0.573795	0.338855	0.0315677	NA	68.7354	1.53429	74.2541	NA	0.925678	NA	-0.111417	2	2	2	2	2	2	0.45431	0.654621	Homo sapiens Rho GTPase activating protein 29 (ARHGAP29), mRNA.
ILMN_2408851	ARHGAP30	0.230422	0.0436747	0.000423795	NA	75.9077	0.0227472	90.4174	NA	0.839526	NA	-0.252354	2	2	2	2	2	2	0.0996575	0.355303	Homo sapiens Rho GTPase activating protein 30 (ARHGAP30), transcript variant 2, mRNA.
ILMN_1750805	ARHGAP30	0.000753012	0.00150602	0.0276104	NA	144.433	2.81984	163.765	NA	0.881951	NA	-0.181229	2	2	2	2	2	2	0.229542	0.516623	Homo sapiens Rho GTPase activating protein 30 (ARHGAP30), transcript variant 1, mRNA.
ILMN_1751164	ARHGAP30	0.860693	0.53012	0.0166057	NA	63.17	0.741744	69.8488	NA	0.904383	NA	-0.144994	2	2	2	2	2	2	0.332556	0.595254	Homo sapiens Rho GTPase activating protein 30 (ARHGAP30), transcript variant 1, mRNA.
ILMN_1770824	ARHGAP4	0.142319	0.0331325	0.076708	NA	80.838	4.38472	93.9656	NA	0.860294	NA	-0.217098	2	2	2	2	2	2	0.157793	0.441999	Homo sapiens Rho GTPase activating protein 4 (ARHGAP4), mRNA.
ILMN_2322747	ARHGAP5	0.130271	0.126506	0.056796	NA	81.0987	3.25699	81.4186	NA	0.99607	NA	-0.0056805	2	2	2	2	2	2	0.963489	0.79613	Homo sapiens Rho GTPase activating protein 5 (ARHGAP5), transcript variant 2, mRNA.
ILMN_1673358	ARHGAP6	0.545934	0.277108	0.0155868	NA	69.1676	0.762332	76.0833	NA	0.909104	NA	-0.137483	2	2	2	2	2	2	0.357566	0.609562	Homo sapiens Rho GTPase activating protein 6 (ARHGAP6), transcript variant 4, mRNA.
ILMN_1806655	ARHGAP6	0.244729	0.192771	0.108393	NA	77.4508	5.93623	78.0926	NA	0.991781	NA	-0.0119071	2	2	2	2	2	2	0.916621	0.785635	Homo sapiens Rho GTPase activating protein 6 (ARHGAP6), transcript variant 4, mRNA.
ILMN_2388746	ARHGAP6	0.299699	0.490964	0.0192013	NA	73.9185	1.00362	70.5571	NA	1.04764	NA	0.0671457	2	2	2	2	2	2	0.651371	0.726557	Homo sapiens Rho GTPase activating protein 6 (ARHGAP6), transcript variant 5, mRNA.
ILMN_1732641	ARHGAP6	0.823795	0.945783	0.00571184	NA	63.9261	0.25819	59.6077	NA	1.07245	NA	0.100909	2	2	2	2	2	2	0.497229	0.674331	Homo sapiens Rho GTPase activating protein 6 (ARHGAP6), transcript variant 2, mRNA.
ILMN_2412475	ARHGAP8	0.0105422	0.00451807	0.0187675	NA	104.021	1.38043	138.391	NA	0.751648	NA	-0.411871	2	2	2	2	2	2	0.0109033	0.0998292	Homo sapiens Rho GTPase activating protein 8 (ARHGAP8), transcript variant 1, mRNA.
ILMN_2342851	ARHGAP8	0.149849	0.115964	0.0347322	NA	79.4692	1.95172	82.315	NA	0.965429	NA	-0.0507584	2	2	2	2	2	2	0.730489	0.746453	Homo sapiens Rho GTPase activating protein 8 (ARHGAP8), transcript variant 2, mRNA.
ILMN_2297096	ARHGAP8	0.72741	0.932229	0.100724	NA	64.9963	4.62922	60.3094	NA	1.07771	NA	0.107976	2	2	2	2	2	2	0.499235	0.675017	Homo sapiens Rho GTPase activating protein 8 (ARHGAP8), transcript variant 1, mRNA.
ILMN_2382657	ARHGAP9	0.128012	0.277108	0.151857	NA	85.4943	9.18032	76.0077	NA	1.12481	NA	0.169684	2	2	2	2	2	2	0.321243	0.588144	Homo sapiens Rho GTPase activating protein 9 (ARHGAP9), transcript variant 3, mRNA.
ILMN_1663916	ARHGAP9	0.000753012	0.0481928	0.10922	NA	172.684	13.3364	89.8193	NA	1.92257	NA	0.943037	2	2	2	2	2	2	6.5513e-06	0.000581916	Homo sapiens Rho GTPase activating protein 9 (ARHGAP9), transcript variant 2, mRNA.
ILMN_1734742	ARHGDIA	0	0	0.2936	NA	1047.76	217.522	1125.82	NA	0.930662	NA	-0.103671	2	2	2	2	2	2	0.483447	0.668881	Homo sapiens Rho GDP dissociation inhibitor (GDI) alpha (ARHGDIA), mRNA.
ILMN_1678143	ARHGDIB	0.195783	0.0060241	0.118731	NA	80.1305	6.72741	119.17	NA	0.672403	NA	-0.572601	2	2	2	2	2	2	0.00132941	0.0248303	Homo sapiens Rho GDP dissociation inhibitor (GDI) beta (ARHGDIB), mRNA.
ILMN_2049274	ARHGDIG	0.0278614	0.0060241	0.216605	NA	105.048	16.0894	117.555	NA	0.893609	NA	-0.162285	2	2	2	2	2	2	0.306319	0.577407	Homo sapiens Rho GDP dissociation inhibitor (GDI) gamma (ARHGDIG), mRNA.
ILMN_2405129	ARHGEF1	0.0873494	0.167169	0.0028309	NA	84.2844	0.168716	79.2861	NA	1.06304	NA	0.0881975	2	2	2	2	2	2	0.5523	0.69456	Homo sapiens Rho guanine nucleotide exchange factor (GEF) 1 (ARHGEF1), transcript variant 1, mRNA.
ILMN_2293131	ARHGEF1	0.0391566	0.191265	0.00487006	NA	90.9766	0.313292	78.1153	NA	1.16464	NA	0.21989	2	2	2	2	2	2	0.147952	0.429699	Homo sapiens Rho guanine nucleotide exchange factor (GEF) 1 (ARHGEF1), transcript variant 1, mRNA.
ILMN_1772370	ARHGEF1	0.00903615	0.0165663	0.257676	NA	121.981	22.2255	101.639	NA	1.20013	NA	0.263194	2	2	2	2	2	2	0.200748	0.490317	Homo sapiens Rho guanine nucleotide exchange factor (GEF) 1 (ARHGEF1), transcript variant 2, mRNA.
ILMN_2132809	ARHGEF10	0	0	0.0603261	NA	414.847	17.6961	555.206	NA	0.747195	NA	-0.420443	2	2	2	2	2	2	0.0101973	0.095795	Homo sapiens Rho guanine nucleotide exchange factor (GEF) 10 (ARHGEF10), mRNA.
ILMN_1727205	ARHGEF10L	0.0587349	0.0225904	0.0602108	NA	88.0267	3.74778	98.7385	NA	0.891514	NA	-0.16567	2	2	2	2	2	2	0.27267	0.552577	Homo sapiens Rho guanine nucleotide exchange factor (GEF) 10-like (ARHGEF10L), transcript variant 1, mRNA.
ILMN_1689770	ARHGEF10L	0.0474398	0.0436747	0.0155696	NA	90.091	0.991846	91.019	NA	0.989804	NA	-0.0147858	2	2	2	2	2	2	0.919867	0.785981	Homo sapiens Rho guanine nucleotide exchange factor (GEF) 10-like (ARHGEF10L), transcript variant 1, mRNA.
ILMN_2389445	ARHGEF10L	0.0677711	0.39759	0.189478	NA	93.1999	12.487	72.5544	NA	1.28455	NA	0.361266	2	2	2	2	2	2	0.0484627	0.243184	Homo sapiens Rho guanine nucleotide exchange factor (GEF) 10-like (ARHGEF10L), transcript variant 2, mRNA.
ILMN_1656546	ARHGEF11	0.764307	0.703313	0.0930952	NA	64.2216	4.2276	66.6543	NA	0.963502	NA	-0.0536403	2	2	2	2	2	2	0.71037	0.741979	Homo sapiens Rho guanine nucleotide exchange factor (GEF) 11 (ARHGEF11), transcript variant 2, mRNA.
ILMN_2347380	ARHGEF11	0.00376506	0.0060241	0.183706	NA	125.183	16.2612	124.44	NA	1.00597	NA	0.00858416	2	2	2	2	2	2	0.982271	0.798646	Homo sapiens Rho guanine nucleotide exchange factor (GEF) 11 (ARHGEF11), transcript variant 1, mRNA.
ILMN_1733861	ARHGEF11	0.00527108	0.0150602	0.0913192	NA	120.379	7.77318	106.061	NA	1.135	NA	0.182687	2	2	2	2	2	2	0.247034	0.531963	Homo sapiens Rho guanine nucleotide exchange factor (GEF) 11 (ARHGEF11), transcript variant 1, mRNA.
ILMN_1810712	ARHGEF12	0.00828313	0.0120482	0.138307	NA	112.49	11.0013	107.09	NA	1.05043	NA	0.0709746	2	2	2	2	2	2	0.686556	0.7367	Homo sapiens Rho guanine nucleotide exchange factor (GEF) 12 (ARHGEF12), mRNA.
ILMN_1792571	ARHGEF15	0.330572	0.0798193	0.0082021	NA	73.1732	0.424387	85.0433	NA	0.860422	NA	-0.216883	2	2	2	2	2	2	0.153276	0.435938	Homo sapiens Rho guanine nucleotide exchange factor (GEF) 15 (ARHGEF15), mRNA.
ILMN_1669928	ARHGEF16	0.00225904	0	0.106245	NA	125.912	9.45927	227.554	NA	0.553327	NA	-0.853797	2	2	2	2	2	2	1.97007e-05	0.00122383	Homo sapiens Rho guanine exchange factor (GEF) 16 (ARHGEF16), mRNA.
ILMN_1754562	ARHGEF17	0.123494	0.341867	0.0635343	NA	81.4823	3.66063	74.1776	NA	1.09847	NA	0.135502	2	2	2	2	2	2	0.376548	0.619281	Homo sapiens Rho guanine nucleotide exchange factor (GEF) 17 (ARHGEF17), mRNA.
ILMN_1664016	ARHGEF18	0	0	0.0572964	NA	1262.96	51.1686	1574.71	NA	0.802029	NA	-0.318274	2	2	2	2	2	2	0.0434452	0.22865	Homo sapiens rho/rac guanine nucleotide exchange factor (GEF) 18 (ARHGEF18), mRNA.
ILMN_1808999	ARHGEF19	0	0.0060241	0.0353064	NA	191.605	4.78349	120.885	NA	1.58501	NA	0.664495	2	2	2	2	2	2	0.0002296	0.00744977	Homo sapiens Rho guanine nucleotide exchange factor (GEF) 19 (ARHGEF19), mRNA.
ILMN_1703477	ARHGEF2	0	0	0.0769631	NA	1830.74	99.6309	1725.37	NA	1.06107	NA	0.0855249	2	2	2	2	2	2	0.582477	0.705203	Homo sapiens rho/rac guanine nucleotide exchange factor (GEF) 2 (ARHGEF2), mRNA.
ILMN_1781010	ARHGEF3	0	0	0.0988226	NA	197.851	13.8255	254.434	NA	0.777613	NA	-0.362877	2	2	2	2	2	2	0.0255873	0.167165	Homo sapiens Rho guanine nucleotide exchange factor (GEF) 3 (ARHGEF3), mRNA.
ILMN_2342282	ARHGEF4	0.862952	0.608434	0.00476949	NA	63.0265	0.212559	68.4554	NA	0.920693	NA	-0.119207	2	2	2	2	2	2	0.423603	0.642465	Homo sapiens Rho guanine nucleotide exchange factor (GEF) 4 (ARHGEF4), transcript variant 2, mRNA.
ILMN_1666076	ARHGEF4	0.0240964	0.0301205	0.212526	NA	106.139	15.9504	95.7234	NA	1.10881	NA	0.149014	2	2	2	2	2	2	0.44462	0.651563	Homo sapiens Rho guanine nucleotide exchange factor (GEF) 4 (ARHGEF4), transcript variant 1, mRNA.
ILMN_1708093	ARHGEF5	0.403614	0.0707831	0.135348	NA	73.9937	7.0816	86.109	NA	0.859302	NA	-0.218762	2	2	2	2	2	2	0.16446	0.451084	Homo sapiens Rho guanine nucleotide exchange factor (GEF) 5 (ARHGEF5), mRNA.
ILMN_2214473	ARHGEF5L	0.00225904	0	0.103161	NA	131.071	9.56111	254.374	NA	0.515271	NA	-0.956597	2	2	2	2	2	2	4.57951e-06	0.00045633	Homo sapiens Rho guanine nucleotide exchange factor (GEF) 5-like (ARHGEF5L), mRNA.
ILMN_1803423	ARHGEF6	0	0	0.106687	NA	203.164	15.3265	236.453	NA	0.859213	NA	-0.218913	2	2	2	2	2	2	0.15895	0.443592	Homo sapiens Rac/Cdc42 guanine nucleotide exchange factor (GEF) 6 (ARHGEF6), mRNA.
ILMN_2235679	ARHGEF7	0.496235	0.313253	0.00991951	NA	70.0422	0.491287	74.9799	NA	0.934146	NA	-0.0982796	2	2	2	2	2	2	0.508275	0.678686	Homo sapiens Rho guanine nucleotide exchange factor (GEF) 7 (ARHGEF7), transcript variant 2, mRNA.
ILMN_1675984	ARHGEF7	0.222139	0.11747	0.145727	NA	80.0511	8.24884	82.2583	NA	0.973167	NA	-0.0392404	2	2	2	2	2	2	0.768784	0.754929	Homo sapiens Rho guanine nucleotide exchange factor (GEF) 7 (ARHGEF7), transcript variant 1, mRNA.
ILMN_1796912	ARHGEF7	0	0	0.0483412	NA	1009.46	34.5058	746.537	NA	1.35219	NA	0.4353	2	2	2	2	2	2	0.00817849	0.0834726	Homo sapiens Rho guanine nucleotide exchange factor (GEF) 7 (ARHGEF7), transcript variant 1, mRNA.
ILMN_1779370	ARHGEF9	0.0331325	0.0527108	0.00885072	NA	92.373	0.578107	89.3984	NA	1.03327	NA	0.0472222	2	2	2	2	2	2	0.749708	0.751468	Homo sapiens Cdc42 guanine nucleotide exchange factor (GEF) 9 (ARHGEF9), mRNA.
ILMN_1734496	ARID1A	0.391566	0.454819	0.0871995	NA	73.0869	4.50649	71.3573	NA	1.02424	NA	0.0345517	2	2	2	2	2	2	0.834358	0.771095	Homo sapiens AT rich interactive domain 1A (SWI-like) (ARID1A), transcript variant 1, mRNA.
ILMN_1797341	ARID1A	0	0	0.0679768	NA	2876.76	138.277	2502.06	NA	1.14976	NA	0.201331	2	2	2	2	2	2	0.194246	0.484016	Homo sapiens AT rich interactive domain 1A (SWI-like) (ARID1A), transcript variant 2, mRNA.
ILMN_1660433	ARID1B	0.14006	0.527108	0.0405159	NA	80.1682	2.29675	70.0158	NA	1.145	NA	0.195351	2	2	2	2	2	2	0.200042	0.490106	Homo sapiens AT rich interactive domain 1B (SWI1-like) (ARID1B), transcript variant 3, mRNA.
ILMN_2415357	ARID1B	0.270331	0.685241	0.204653	NA	81.5572	11.8023	66.8972	NA	1.21914	NA	0.285868	2	2	2	2	2	2	0.124031	0.395768	Homo sapiens AT rich interactive domain 1B (SWI1-like) (ARID1B), transcript variant 3, mRNA.
ILMN_2182335	ARID2	0.00828313	0.0225904	0.020914	NA	106.555	1.57578	98.5709	NA	1.081	NA	0.112365	2	2	2	2	2	2	0.451638	0.654043	Homo sapiens AT rich interactive domain 2 (ARID, RFX-like) (ARID2), mRNA.
ILMN_1670130	ARID3A	0	0	0.0299181	NA	518.409	10.9671	501.509	NA	1.0337	NA	0.047814	2	2	2	2	2	2	0.748957	0.751179	Homo sapiens AT rich interactive domain 3A (BRIGHT-like) (ARID3A), mRNA.
ILMN_1757626	ARID3C	0.399096	0.807229	0.0470789	NA	72.0789	2.39949	64.0617	NA	1.12515	NA	0.170115	2	2	2	2	2	2	0.26375	0.545192	Homo sapiens AT rich interactive domain 3C (BRIGHT-like) (ARID3C), mRNA.
ILMN_2338447	ARID4A	0.0858434	0.0436747	0.0141838	NA	83.9262	0.841735	90.6588	NA	0.925737	NA	-0.111326	2	2	2	2	2	2	0.454447	0.654633	Homo sapiens AT rich interactive domain 4A (RBP1-like) (ARID4A), transcript variant 2, mRNA.
ILMN_1810229	ARID4A	0.317771	0.207831	0.0125518	NA	73.3774	0.651258	77.8453	NA	0.942606	NA	-0.0852732	2	2	2	2	2	2	0.565388	0.698854	Homo sapiens AT rich interactive domain 4A (RBP1-like) (ARID4A), transcript variant 3, mRNA.
ILMN_1676626	ARID4A	0.144578	0.0828313	0.062323	NA	80.7216	3.55732	84.4414	NA	0.955948	NA	-0.0649956	2	2	2	2	2	2	0.65865	0.728989	Homo sapiens AT rich interactive domain 4A (RBP1-like) (ARID4A), transcript variant 1, mRNA.
ILMN_1761334	ARID4B	0.0233434	0.0120482	0.078192	NA	99.1094	5.47977	106.776	NA	0.9282	NA	-0.107492	2	2	2	2	2	2	0.471139	0.662929	Homo sapiens AT rich interactive domain 4B (RBP1-like) (ARID4B), transcript variant 1, mRNA.
ILMN_2362982	ARID4B	0.00301205	0.0060241	0.0518019	NA	127.632	4.67509	130.629	NA	0.977054	NA	-0.0334895	2	2	2	2	2	2	0.817503	0.767066	Homo sapiens AT rich interactive domain 4B (RBP1-like) (ARID4B), transcript variant 1, mRNA.
ILMN_2269564	ARID4B	0	0	0.0029133	NA	296.671	0.611146	229.408	NA	1.2932	NA	0.370947	2	2	2	2	2	2	0.0198157	0.143553	Homo sapiens AT rich interactive domain 4B (RBP1-like) (ARID4B), transcript variant 1, mRNA.
ILMN_2415157	ARID5A	0.48494	0.123494	0.128514	NA	71.3641	6.48508	81.864	NA	0.87174	NA	-0.198031	2	2	2	2	2	2	0.203482	0.492589	Homo sapiens AT rich interactive domain 5A (MRF1-like) (ARID5A), mRNA.
ILMN_1689700	ARID5A	0.783133	0.841867	0.0410411	NA	64.6805	1.87706	63.3909	NA	1.02034	NA	0.0290546	2	2	2	2	2	2	0.84831	0.773446	Homo sapiens AT rich interactive domain 5A (MRF1-like) (ARID5A), mRNA.
ILMN_2298567	ARID5A	0.472892	0.670181	0.0326362	NA	70.517	1.62734	67.3421	NA	1.04715	NA	0.0664618	2	2	2	2	2	2	0.656757	0.728774	Homo sapiens AT rich interactive domain 5A (MRF1-like) (ARID5A), mRNA.
ILMN_1721626	ARID5B	0.00225904	0.0436747	0.0929979	NA	128.722	8.46467	90.4284	NA	1.42347	NA	0.509408	2	2	2	2	2	2	0.00329099	0.0452719	Homo sapiens AT rich interactive domain 5B (MRF1-like) (ARID5B), mRNA.
ILMN_1694219	ARIH1	0	0	0.103576	NA	447.505	32.775	473.767	NA	0.944567	NA	-0.0822743	2	2	2	2	2	2	0.57683	0.702394	Homo sapiens ariadne homolog, ubiquitin-conjugating enzyme E2 binding protein, 1 (Drosophila) (ARIH1), mRNA.
ILMN_1792825	ARIH2	0	0	0.119033	NA	1096.53	92.2937	1430.95	NA	0.766295	NA	-0.384028	2	2	2	2	2	2	0.0203049	0.145185	Homo sapiens ariadne homolog 2 (Drosophila) (ARIH2), mRNA.
ILMN_1813091	ARL1	0	0	0.0588959	NA	954.487	39.7503	975.993	NA	0.977964	NA	-0.0321464	2	2	2	2	2	2	0.823531	0.768132	Homo sapiens ADP-ribosylation factor-like 1 (ARL1), mRNA.
ILMN_1769168	ARL10	0.133283	0.0843374	0.078669	NA	81.5449	4.53613	84.4116	NA	0.96604	NA	-0.049845	2	2	2	2	2	2	0.730929	0.746472	Homo sapiens ADP-ribosylation factor-like 10 (ARL10), mRNA.
ILMN_1808383	ARL11	0.610693	0.576807	0.0876263	NA	67.8459	4.20381	69.1242	NA	0.981506	NA	-0.0269303	2	2	2	2	2	2	0.845178	0.773126	Homo sapiens ADP-ribosylation factor-like 11 (ARL11), mRNA.
ILMN_1777550	ARL13A	0.385542	0.406627	0.0860961	NA	72.9929	4.44374	72.2662	NA	1.01005	NA	0.0144338	2	2	2	2	2	2	0.938316	0.789371	Homo sapiens ADP-ribosylation factor-like 13A (ARL13A), mRNA.
ILMN_2403047	ARL13B	0.121235	0.278614	0.0769636	NA	82.6492	4.49789	75.9662	NA	1.08797	NA	0.121643	2	2	2	2	2	2	0.432712	0.646726	Homo sapiens ADP-ribosylation factor-like 13B (ARL13B), transcript variant 2, mRNA.
ILMN_1777301	ARL13B	0.540663	0.953313	0.0583438	NA	69.2176	2.85559	58.875	NA	1.17567	NA	0.233483	2	2	2	2	2	2	0.13234	0.407381	Homo sapiens ADP-ribosylation factor-like 13B (ARL13B), transcript variant 1, mRNA.
ILMN_2232463	ARL14	0.67997	0.637048	0.00168933	NA	66.9574	0.0799831	67.9014	NA	0.986097	NA	-0.0201984	2	2	2	2	2	2	0.891237	0.78174	Homo sapiens ADP-ribosylation factor-like 14 (ARL14), mRNA.
ILMN_2202967	ARL15	0.113705	0.0993976	0.0164998	NA	81.3283	0.948865	83.3011	NA	0.976317	NA	-0.0345787	2	2	2	2	2	2	0.814688	0.766218	Homo sapiens ADP-ribosylation factor-like 15 (ARL15), mRNA.
ILMN_2188119	ARL16	0	0	0.0747121	NA	560.483	29.61	565.965	NA	0.990314	NA	-0.0140428	2	2	2	2	2	2	0.91524	0.785512	Homo sapiens ADP-ribosylation factor-like 16 (ARL16), mRNA.
ILMN_1787879	ARL2	0	0	0.0275036	NA	2160.18	42.0112	2466.16	NA	0.875929	NA	-0.191113	2	2	2	2	2	2	0.206121	0.494981	Homo sapiens ADP-ribosylation factor-like 2 (ARL2), mRNA.
ILMN_1755391	ARL2BP	0	0	0.0506478	NA	807.525	28.9202	925.988	NA	0.872069	NA	-0.197486	2	2	2	2	2	2	0.1936	0.48313	Homo sapiens ADP-ribosylation factor-like 2 binding protein (ARL2BP), mRNA.
ILMN_1780444	ARL3	0.000753012	0.0060241	0.103387	NA	159.736	11.6776	117.048	NA	1.3647	NA	0.44858	2	2	2	2	2	2	0.00859771	0.0864626	Homo sapiens ADP-ribosylation factor-like 3 (ARL3), mRNA.
ILMN_1753663	ARL4A	0.385542	0.304217	0.00309095	NA	71.8546	0.157048	75.3048	NA	0.954184	NA	-0.0676614	2	2	2	2	2	2	0.647769	0.725501	Homo sapiens ADP-ribosylation factor-like 4A (ARL4A), transcript variant 3, mRNA.
ILMN_1743241	ARL4A	0.00978916	0.0165663	0.0310678	NA	105.203	2.31111	101.304	NA	1.03848	NA	0.0544754	2	2	2	2	2	2	0.715497	0.743102	Homo sapiens ADP-ribosylation factor-like 4A (ARL4A), transcript variant 3, mRNA.
ILMN_2369953	ARL4A	0.455572	0.689759	0.0896788	NA	71.5654	4.53814	66.8596	NA	1.07038	NA	0.0981276	2	2	2	2	2	2	0.533824	0.688011	Homo sapiens ADP-ribosylation factor-like 4A (ARL4A), transcript variant 3, mRNA.
ILMN_1775405	ARL4A	0	0	0.074296	NA	388.651	20.4179	340.913	NA	1.14003	NA	0.189071	2	2	2	2	2	2	0.224116	0.510496	Homo sapiens ADP-ribosylation factor-like 4A (ARL4A), transcript variant 1, mRNA.
ILMN_1704842	ARL4A	0	0.00150602	0.0203414	NA	212.263	3.05309	165.149	NA	1.28528	NA	0.36208	2	2	2	2	2	2	0.0227621	0.155233	Homo sapiens ADP-ribosylation factor-like 4A (ARL4A), transcript variant 3, mRNA.
ILMN_1768391	ARL4C	0.256024	0.106928	0.140642	NA	78.5837	7.81509	83.0545	NA	0.94617	NA	-0.0798282	2	2	2	2	2	2	0.585094	0.706126	Homo sapiens ADP-ribosylation factor-like 4C (ARL4C), mRNA.
ILMN_1719010	ARL4D	0.10994	0.0798193	0.107429	NA	84.6759	6.4323	85.1062	NA	0.994944	NA	-0.00731234	2	2	2	2	2	2	0.94062	0.789998	Homo sapiens ADP-ribosylation factor-like 4D (ARL4D), mRNA.
ILMN_1771738	ARL5A	0.000753012	0	0.120738	NA	159.48	13.6155	214.055	NA	0.745043	NA	-0.424605	2	2	2	2	2	2	0.0115968	0.103175	Homo sapiens ADP-ribosylation factor-like 5A (ARL5A), transcript variant 1, mRNA.
ILMN_2332558	ARL5A	0	0	0.157325	NA	396.206	44.0763	520.463	NA	0.761257	NA	-0.393545	2	2	2	2	2	2	0.0205684	0.145815	Homo sapiens ADP-ribosylation factor-like 5A (ARL5A), transcript variant 3, mRNA.
ILMN_1688526	ARL5A	0	0	0.0116803	NA	1966.85	16.2446	2577.9	NA	0.762966	NA	-0.390309	2	2	2	2	2	2	0.0149567	0.120876	Homo sapiens ADP-ribosylation factor-like 5A (ARL5A), transcript variant 3, mRNA.
ILMN_2120022	ARL5B	0	0	0.0024943	NA	210.062	0.370495	173.965	NA	1.20749	NA	0.272017	2	2	2	2	2	2	0.0775894	0.311002	Homo sapiens ADP-ribosylation factor-like 5B (ARL5B), mRNA.
ILMN_1703325	ARL6	0.83509	0.406627	0.00754933	NA	63.7627	0.340377	72.2624	NA	0.882377	NA	-0.180533	2	2	2	2	2	2	0.230671	0.517905	Homo sapiens ADP-ribosylation factor-like 6 (ARL6), transcript variant 1, mRNA.
ILMN_2307266	ARL6	0.801958	0.805723	0.0870892	NA	63.491	3.90986	64.0894	NA	0.990663	NA	-0.0135334	2	2	2	2	2	2	0.914742	0.785512	Homo sapiens ADP-ribosylation factor-like 6 (ARL6), transcript variant 1, mRNA.
ILMN_1750488	ARL6	0.292169	0.813253	0.080362	NA	75.1078	4.26797	63.9686	NA	1.17414	NA	0.231599	2	2	2	2	2	2	0.141375	0.420017	Homo sapiens ADP-ribosylation factor-like 6 (ARL6), transcript variant 2, mRNA.
ILMN_2113362	ARL6IP1	0.113705	0.129518	0.000413317	NA	81.2772	0.023754	81.2211	NA	1.00069	NA	0.000997291	2	2	2	2	2	2	0.994612	0.800302	Homo sapiens ADP-ribosylation factor-like 6 interacting protein 1 (ARL6IP1), mRNA.
ILMN_2393144	ARL6IP4	0	0	0.0207588	NA	284.553	4.17687	353.278	NA	0.805465	NA	-0.312106	2	2	2	2	2	2	0.045713	0.234603	Homo sapiens ADP-ribosylation-like factor 6 interacting protein 4 (ARL6IP4), transcript variant 3, mRNA.
ILMN_1791149	ARL6IP4	0.0150602	0.00451807	0.186457	NA	111.211	14.6625	137.761	NA	0.807269	NA	-0.308879	2	2	2	2	2	2	0.0655523	0.284629	Homo sapiens ADP-ribosylation-like factor 6 interacting protein 4 (ARL6IP4), transcript variant 1, mRNA.
ILMN_1779835	ARL6IP4	0.233434	0.204819	0.0594198	NA	76.633	3.21982	77.8715	NA	0.984095	NA	-0.0231301	2	2	2	2	2	2	0.870546	0.778379	Homo sapiens ADP-ribosylation-like factor 6 interacting protein 4 (ARL6IP4), transcript variant 4, mRNA.
ILMN_1769810	ARL6IP5	0	0	0.0867757	NA	429.894	26.3781	506.253	NA	0.849169	NA	-0.235877	2	2	2	2	2	2	0.128183	0.401746	Homo sapiens ADP-ribosylation-like factor 6 interacting protein 5 (ARL6IP5), mRNA.
ILMN_2117902	ARL6IP6	0.403614	0.551205	0.0657205	NA	72.144	3.35263	69.4711	NA	1.03848	NA	0.0544672	2	2	2	2	2	2	0.725001	0.745061	Homo sapiens ADP-ribosylation-like factor 6 interacting protein 6 (ARL6IP6), mRNA.
ILMN_1659148	ARL8A	0.149849	0.0421687	0.22411	NA	88.1785	13.9736	91.6778	NA	0.961831	NA	-0.0561452	2	2	2	2	2	2	0.670352	0.732489	Homo sapiens ADP-ribosylation factor-like 8A (ARL8A), mRNA.
ILMN_1752837	ARL8B	0	0	0.00312012	NA	323.602	0.71395	199.447	NA	1.62249	NA	0.698213	2	2	2	2	2	2	0.000128932	0.00509248	Homo sapiens ADP-ribosylation factor-like 8B (ARL8B), mRNA.
ILMN_1777691	ARL9	0.332078	0.316265	0.053133	NA	73.6223	2.76604	74.8869	NA	0.983114	NA	-0.0245695	2	2	2	2	2	2	0.863969	0.776908	Homo sapiens ADP-ribosylation factor-like 9 (ARL9), mRNA.
ILMN_1722066	ARMC1	0	0	0.0703722	NA	260.854	12.9802	285.604	NA	0.913339	NA	-0.130777	2	2	2	2	2	2	0.383335	0.623051	Homo sapiens armadillo repeat containing 1 (ARMC1), mRNA.
ILMN_2052598	ARMC10	0	0	0.00778019	NA	1236	6.79978	1209.23	NA	1.02214	NA	0.0315946	2	2	2	2	2	2	0.830856	0.770207	Homo sapiens armadillo repeat containing 10 (ARMC10), mRNA.
ILMN_2213008	ARMC2	0.517319	0.35241	0.0930006	NA	69.8288	4.59204	73.6398	NA	0.948249	NA	-0.0766622	2	2	2	2	2	2	0.602368	0.711169	Homo sapiens armadillo repeat containing 2 (ARMC2), mRNA.
ILMN_1776395	ARMC4	0.0722892	0.39006	0.0308968	NA	86.5051	1.8899	72.7087	NA	1.18975	NA	0.250656	2	2	2	2	2	2	0.103421	0.362074	Homo sapiens armadillo repeat containing 4 (ARMC4), mRNA.
ILMN_1697088	ARMC5	0.0256024	0.0316265	0.0628309	NA	97.7002	4.34064	94.5561	NA	1.03325	NA	0.0471905	2	2	2	2	2	2	0.760483	0.753467	Homo sapiens armadillo repeat containing 5 (ARMC5), mRNA.
ILMN_1697118	ARMC6	0	0	0.0755866	NA	369.288	19.7376	447.629	NA	0.824985	NA	-0.27756	2	2	2	2	2	2	0.076006	0.307379	Homo sapiens armadillo repeat containing 6 (ARMC6), mRNA.
ILMN_1797298	ARMC7	0	0	0.0274398	NA	338.64	6.57057	345.755	NA	0.979419	NA	-0.0300017	2	2	2	2	2	2	0.838139	0.771315	Homo sapiens armadillo repeat containing 7 (ARMC7), mRNA.
ILMN_1797453	ARMC8	0.0240964	0.00451807	0.0761322	NA	98.886	5.32339	137.277	NA	0.72034	NA	-0.473251	2	2	2	2	2	2	0.00484221	0.0587113	Homo sapiens armadillo repeat containing 8 (ARMC8), transcript variant 2, mRNA.
ILMN_1781151	ARMC8	0	0	0.0890995	NA	396.562	24.9845	545.412	NA	0.727087	NA	-0.459799	2	2	2	2	2	2	0.00618313	0.0686129	Homo sapiens armadillo repeat containing 8 (ARMC8), transcript variant 2, mRNA.
ILMN_1656557	ARMC8	0.240211	0.128012	0.0989035	NA	77.3171	5.4072	81.2524	NA	0.951567	NA	-0.0716233	2	2	2	2	2	2	0.624867	0.718166	Homo sapiens armadillo repeat containing 8 (ARMC8), transcript variant 3, mRNA.
ILMN_2385318	ARMC8	0.301958	0.237952	0.00608289	NA	73.8347	0.317582	76.8355	NA	0.960946	NA	-0.0574724	2	2	2	2	2	2	0.69772	0.739275	Homo sapiens armadillo repeat containing 8 (ARMC8), transcript variant 1, mRNA.
ILMN_1755732	ARMC9	0.109187	0.0150602	0.0102243	NA	81.6698	0.590447	103.916	NA	0.785919	NA	-0.347547	2	2	2	2	2	2	0.0277754	0.175543	Homo sapiens armadillo repeat containing 9 (ARMC9), mRNA.
ILMN_2180677	ARMCX1	0.120482	0.0165663	0.021721	NA	80.8283	1.24145	100.471	NA	0.804492	NA	-0.31385	2	2	2	2	2	2	0.0446582	0.232348	Homo sapiens armadillo repeat containing, X-linked 1 (ARMCX1), mRNA.
ILMN_1785170	ARMCX2	0	0	0.0830535	NA	1498.52	88.0044	1326.06	NA	1.13005	NA	0.176385	2	2	2	2	2	2	0.25958	0.542118	Homo sapiens armadillo repeat containing, X-linked 2 (ARMCX2), mRNA.
ILMN_1651741	ARMCX3	0.343373	0.402108	0.053368	NA	73.279	2.76532	72.4594	NA	1.01131	NA	0.0162268	2	2	2	2	2	2	0.918933	0.785678	Homo sapiens armadillo repeat containing, X-linked 3 (ARMCX3), transcript variant 3, mRNA.
ILMN_2334760	ARMCX3	0	0	0.0520679	NA	318.315	11.7196	295.673	NA	1.07658	NA	0.106449	2	2	2	2	2	2	0.482651	0.66829	Homo sapiens armadillo repeat containing, X-linked 3 (ARMCX3), transcript variant 2, mRNA.
ILMN_1741156	ARMCX5	0.00225904	0.0225904	0.113375	NA	126.307	10.1258	98.8784	NA	1.27739	NA	0.353204	2	2	2	2	2	2	0.0344065	0.199647	Homo sapiens armadillo repeat containing, X-linked 5 (ARMCX5), mRNA.
ILMN_1716026	ARMCX6	0	0	0.00802306	NA	191.523	1.08654	240.151	NA	0.797508	NA	-0.32643	2	2	2	2	2	2	0.0373595	0.20978	Homo sapiens armadillo repeat containing, X-linked 6 (ARMCX6), transcript variant 1, mRNA.
ILMN_2414533	ARMCX6	0	0	0.0671288	NA	262.947	12.4814	291.078	NA	0.903356	NA	-0.146634	2	2	2	2	2	2	0.330002	0.59366	Homo sapiens armadillo repeat containing, X-linked 6 (ARMCX6), transcript variant 1, mRNA.
ILMN_2183510	ARMET	0	0	0.0588657	NA	2891.18	120.344	3791.06	NA	0.762631	NA	-0.390942	2	2	2	2	2	2	0.0156656	0.124754	Homo sapiens arginine-rich, mutated in early stage tumors (ARMET), mRNA.
ILMN_1762582	ARNT	0.0451807	0.0060241	0.116207	NA	92.6249	7.61103	115.862	NA	0.799443	NA	-0.322932	2	2	2	2	2	2	0.0456845	0.234603	Homo sapiens aryl hydrocarbon receptor nuclear translocator (ARNT), transcript variant 1, mRNA.
ILMN_2347314	ARNT	0.00376506	0.0060241	0.178605	NA	126.635	15.9932	114.662	NA	1.10442	NA	0.143293	2	2	2	2	2	2	0.429165	0.645168	Homo sapiens aryl hydrocarbon receptor nuclear translocator (ARNT), transcript variant 2, mRNA.
ILMN_1718046	ARNT2	0.616717	0.240964	0.104638	NA	67.4572	4.99116	76.7056	NA	0.87943	NA	-0.18536	2	2	2	2	2	2	0.227702	0.514295	Homo sapiens aryl-hydrocarbon receptor nuclear translocator 2 (ARNT2), mRNA.
ILMN_1731476	ARNTL	0.0918675	0.0436747	0.00507912	NA	83.2867	0.299123	90.3968	NA	0.921346	NA	-0.118186	2	2	2	2	2	2	0.42752	0.644731	Homo sapiens aryl hydrocarbon receptor nuclear translocator-like (ARNTL), transcript variant 3, mRNA.
ILMN_2405305	ARNTL	0	0.00150602	0.0507027	NA	160.196	5.74338	167.477	NA	0.956523	NA	-0.0641283	2	2	2	2	2	2	0.663525	0.730683	Homo sapiens aryl hydrocarbon receptor nuclear translocator-like (ARNTL), transcript variant 2, mRNA.
ILMN_1798064	ARNTL2	0.375753	0.108434	0.00164893	NA	72.0221	0.0839757	82.7342	NA	0.870524	NA	-0.200043	2	2	2	2	2	2	0.18596	0.474946	Homo sapiens aryl hydrocarbon receptor nuclear translocator-like 2 (ARNTL2), mRNA.
ILMN_1759915	ARPC1A	0	0	0.0924592	NA	2770.82	181.152	2629.97	NA	1.05356	NA	0.07527	2	2	2	2	2	2	0.637068	0.721835	Homo sapiens actin related protein 2/3 complex, subunit 1A, 41kDa (ARPC1A), mRNA.
ILMN_2085760	ARPC1B	0	0	0.185075	NA	349.923	45.7938	342.981	NA	1.02024	NA	0.0289101	2	2	2	2	2	2	0.921265	0.786312	Homo sapiens actin related protein 2/3 complex, subunit 1B, 41kDa (ARPC1B), mRNA.
ILMN_1810200	ARPC2	0.198042	0.0256024	0.0916567	NA	78.6491	5.09733	97.5706	NA	0.806074	NA	-0.311016	2	2	2	2	2	2	0.0506218	0.24865	Homo sapiens actin related protein 2/3 complex, subunit 2, 34kDa (ARPC2), transcript variant 2, mRNA.
ILMN_1792489	ARPC2	0	0	0.0489952	NA	3334.05	115.508	3449.56	NA	0.966515	NA	-0.0491356	2	2	2	2	2	2	0.737666	0.747816	Homo sapiens actin related protein 2/3 complex, subunit 2, 34kDa (ARPC2), transcript variant 2, mRNA.
ILMN_2255021	ARPC2	0.16491	0.15512	0.287044	NA	91.9741	18.6681	79.6918	NA	1.15412	NA	0.206796	2	2	2	2	2	2	0.359099	0.61032	Homo sapiens actin related protein 2/3 complex, subunit 2, 34kDa (ARPC2), transcript variant 1, mRNA.
ILMN_1655561	ARPC3	0	0	0.0272918	NA	4338.8	83.7311	4178.44	NA	1.03838	NA	0.0543317	2	2	2	2	2	2	0.715588	0.743118	Homo sapiens actin related protein 2/3 complex, subunit 3, 21kDa (ARPC3), mRNA.
ILMN_1803183	ARPC4	0.233434	0.180723	0.131895	NA	78.9088	7.35932	78.5736	NA	1.00427	NA	0.00614192	2	2	2	2	2	2	0.99919	0.800302	Homo sapiens actin related protein 2/3 complex, subunit 4, 20kDa (ARPC4), transcript variant 1, mRNA.
ILMN_1707336	ARPC4	0	0	0.0626403	NA	773.207	34.248	689.881	NA	1.12078	NA	0.164508	2	2	2	2	2	2	0.284165	0.5618	Homo sapiens actin related protein 2/3 complex, subunit 4, 20kDa (ARPC4), transcript variant 2, mRNA.
ILMN_2393763	ARPC4	0	0	0.207005	NA	1953.68	285.97	1489.86	NA	1.31132	NA	0.391022	2	2	2	2	2	2	0.0383301	0.212611	Homo sapiens actin related protein 2/3 complex, subunit 4, 20kDa (ARPC4), transcript variant 3, mRNA.
ILMN_1768394	ARPC5	0	0	0.113999	NA	554.163	44.6707	544.329	NA	1.01807	NA	0.0258315	2	2	2	2	2	2	0.891597	0.781836	Homo sapiens actin related protein 2/3 complex, subunit 5, 16kDa (ARPC5), mRNA.
ILMN_2043816	ARPC5L	0	0	0.027642	NA	1062.33	20.7641	1388.35	NA	0.765171	NA	-0.386146	2	2	2	2	2	2	0.0160687	0.126976	Homo sapiens actin related protein 2/3 complex, subunit 5-like (ARPC5L), mRNA.
ILMN_1782810	ARPM1	0.0662651	0.0677711	0.0582817	NA	87.1908	3.59325	87.3744	NA	0.997899	NA	-0.00303451	2	2	2	2	2	2	0.977283	0.798022	Homo sapiens actin related protein M1 (ARPM1), mRNA.
ILMN_1776442	ARPM2	0.693524	0.525602	0.0274136	NA	66.7108	1.29314	70.1279	NA	0.951273	NA	-0.0720685	2	2	2	2	2	2	0.626373	0.718796	Homo sapiens actin-related protein M2 (ARPM2), mRNA.
ILMN_2059505	ARPP19	0	0	0.243742	NA	201.055	34.6521	228.244	NA	0.880876	NA	-0.18299	2	2	2	2	2	2	0.261245	0.543427	Homo sapiens cAMP-regulated phosphoprotein, 19kDa (ARPP19), mRNA.
ILMN_2374728	ARPP-21	0.795934	0.670181	0.0300565	NA	64.4084	1.36888	67.3205	NA	0.956742	NA	-0.0637981	2	2	2	2	2	2	0.666039	0.731399	Homo sapiens cyclic AMP-regulated phosphoprotein, 21 kD (ARPP-21), transcript variant 3, mRNA.
ILMN_1671402	ARPP-21	0.612952	0.771084	0.0422083	NA	67.9081	2.02677	64.8886	NA	1.04653	NA	0.065617	2	2	2	2	2	2	0.662971	0.730621	Homo sapiens cyclic AMP-regulated phosphoprotein, 21 kD (ARPP-21), transcript variant 1, mRNA.
ILMN_2289825	ARPP-21	0.575301	0.771084	0.0439028	NA	68.6321	2.13061	64.8982	NA	1.05754	NA	0.0807055	2	2	2	2	2	2	0.592192	0.708495	Homo sapiens cyclic AMP-regulated phosphoprotein, 21 kD (ARPP-21), transcript variant 1, mRNA.
ILMN_2251505	ARPP-21	0.0421687	0.311747	0.140089	NA	95.057	9.41617	75.0269	NA	1.26697	NA	0.341386	2	2	2	2	2	2	0.0460387	0.235536	Homo sapiens cyclic AMP-regulated phosphoprotein, 21 kD (ARPP-21), transcript variant 2, mRNA.
ILMN_1660126	ARR3	0.650602	0.85994	0.0842795	NA	67.0899	3.99819	63.0145	NA	1.06467	NA	0.0904112	2	2	2	2	2	2	0.564342	0.698719	Homo sapiens arrestin 3, retinal (X-arrestin) (ARR3), mRNA.
ILMN_2325168	ARRB1	0	0	0.235952	NA	246.717	41.1632	388.405	NA	0.635206	NA	-0.654704	2	2	2	2	2	2	0.0010677	0.0216298	Homo sapiens arrestin, beta 1 (ARRB1), transcript variant 2, mRNA.
ILMN_1730620	ARRB1	0	0	0.0561525	NA	325.34	12.9179	398.156	NA	0.817116	NA	-0.291388	2	2	2	2	2	2	0.0621002	0.276427	Homo sapiens arrestin, beta 1 (ARRB1), transcript variant 1, mRNA.
ILMN_1675866	ARRB2	0.127259	0.063253	0.0492934	NA	81.0444	2.82486	87.7877	NA	0.923186	NA	-0.115307	2	2	2	2	2	2	0.439474	0.648652	Homo sapiens arrestin, beta 2 (ARRB2), transcript variant 2, mRNA.
ILMN_2395711	ARRB2	0.00150602	0.0436747	0.00753841	NA	139.742	0.744889	91.4032	NA	1.52885	NA	0.612448	2	2	2	2	2	2	0.000488972	0.0125966	Homo sapiens arrestin, beta 2 (ARRB2), transcript variant 2, mRNA.
ILMN_1661492	ARRDC1	0.324548	0.759036	0.11032	NA	75.3765	5.87996	65.2687	NA	1.15486	NA	0.207724	2	2	2	2	2	2	0.198332	0.488251	Homo sapiens arrestin domain containing 1 (ARRDC1), mRNA.
ILMN_1655612	ARRDC2	0.0128012	0.0060241	0.129837	NA	107.548	9.87381	124.793	NA	0.861814	NA	-0.214552	2	2	2	2	2	2	0.171005	0.458514	Homo sapiens arrestin domain containing 2 (ARRDC2), transcript variant 1, mRNA.
ILMN_1715181	ARRDC2	0.77259	0.656627	0.0639132	NA	64.7874	2.92797	67.6045	NA	0.958331	NA	-0.0614048	2	2	2	2	2	2	0.675825	0.733976	Homo sapiens arrestin domain containing 2 (ARRDC2), transcript variant 1, mRNA.
ILMN_1710229	ARRDC2	0.0112952	0.24247	0.134052	NA	106.934	10.1362	76.6364	NA	1.39535	NA	0.480625	2	2	2	2	2	2	0.00667715	0.0725527	Homo sapiens arrestin domain containing 2 (ARRDC2), transcript variant 2, mRNA.
ILMN_2198515	ARRDC3	0.000753012	0.00150602	0.134219	NA	160.326	15.216	159.877	NA	1.00281	NA	0.00404174	2	2	2	2	2	2	0.987431	0.799433	Homo sapiens arrestin domain containing 3 (ARRDC3), mRNA.
ILMN_2184064	ARRDC4	0.760542	0.444277	0.124302	NA	63.6124	5.59119	71.5782	NA	0.888712	NA	-0.170212	2	2	2	2	2	2	0.268765	0.549556	Homo sapiens arrestin domain containing 4 (ARRDC4), mRNA.
ILMN_2153787	ARRDC5	0.779367	0.837349	0.0819845	NA	64.2534	3.72488	63.4905	NA	1.01202	NA	0.0172316	2	2	2	2	2	2	0.922173	0.786409	Homo sapiens arrestin domain containing 5 (ARRDC5), mRNA.
ILMN_2358202	ARS2	0	0	0.106988	NA	3958.63	299.479	4333.62	NA	0.913468	NA	-0.130573	2	2	2	2	2	2	0.386965	0.624876	Homo sapiens arsenate resistance protein 2 (ARS2), transcript variant 1, mRNA.
ILMN_1733295	ARS2	0.786145	0.912651	0.0800785	NA	64.0993	3.62956	61.3917	NA	1.0441	NA	0.0622644	2	2	2	2	2	2	0.692618	0.737968	Homo sapiens arsenate resistance protein 2 (ARS2), transcript variant 2, mRNA.
ILMN_2047240	ARSA	0.0286145	0.0180723	0.378296	NA	120.805	32.3149	99.3767	NA	1.21563	NA	0.281703	2	2	2	2	2	2	0.301234	0.574451	Homo sapiens arylsulfatase A (ARSA), mRNA.
ILMN_1668727	ARSB	0.329819	0.108434	0.0518887	NA	73.5139	2.69729	82.7598	NA	0.88828	NA	-0.170913	2	2	2	2	2	2	0.257649	0.54078	Homo sapiens arylsulfatase B (ARSB), transcript variant 2, mRNA.
ILMN_2242937	ARSB	0.0112952	0.0165663	0.0790634	NA	106.402	5.94856	102.036	NA	1.04279	NA	0.0604496	2	2	2	2	2	2	0.700978	0.740594	Homo sapiens arylsulfatase B (ARSB), transcript variant 1, mRNA.
ILMN_1722045	ARSB	0.0150602	0.0888554	0.1571	NA	105.591	11.7297	84.1345	NA	1.25503	NA	0.327723	2	2	2	2	2	2	0.0598479	0.271232	Homo sapiens arylsulfatase B (ARSB), transcript variant 1, mRNA.
ILMN_1684873	ARSD	0.0436747	0.0180723	0.0810178	NA	91.8813	5.26372	99.3154	NA	0.925146	NA	-0.112247	2	2	2	2	2	2	0.452523	0.65434	Homo sapiens arylsulfatase D (ARSD), transcript variant 1, mRNA.
ILMN_1661624	ARSD	0.0406627	0.0527108	0.113341	NA	93.8014	7.51762	89.0593	NA	1.05325	NA	0.0748434	2	2	2	2	2	2	0.651364	0.726557	Homo sapiens arylsulfatase D (ARSD), transcript variant 2, mRNA.
ILMN_1684956	ARSD	0.222139	0.402108	0.056079	NA	76.5538	3.03565	72.3866	NA	1.05757	NA	0.0807515	2	2	2	2	2	2	0.595701	0.709156	Homo sapiens arylsulfatase D (ARSD), transcript variant 1, mRNA.
ILMN_1727462	ARSE	0.0143072	0.0105422	0.049328	NA	101.369	3.53577	108.922	NA	0.930658	NA	-0.103676	2	2	2	2	2	2	0.485957	0.669336	Homo sapiens arylsulfatase E (chondrodysplasia punctata 1) (ARSE), mRNA.
ILMN_1664001	ARSF	0.595633	0.728916	0.160368	NA	67.5937	7.66495	66.1683	NA	1.02154	NA	0.0307488	2	2	2	2	2	2	0.894802	0.782394	Homo sapiens arylsulfatase F (ARSF), mRNA.
ILMN_1720604	ARSG	0.0293675	0.0286145	0.032898	NA	93.8214	2.18251	96.2122	NA	0.975151	NA	-0.0363026	2	2	2	2	2	2	0.804743	0.763265	Homo sapiens arylsulfatase G (ARSG), mRNA.
ILMN_1757896	ARSH	0.607681	0.608434	0.0462629	NA	67.9617	2.22322	68.4189	NA	0.993319	NA	-0.0096715	2	2	2	2	2	2	0.944089	0.790863	Homo sapiens arylsulfatase family, member H (ARSH), mRNA.
ILMN_1727156	ARSI	0.128765	0.0707831	0.0531361	NA	81.1223	3.048	86.1484	NA	0.941658	NA	-0.0867247	2	2	2	2	2	2	0.558553	0.696913	Homo sapiens arylsulfatase family, member I (ARSI), mRNA.
ILMN_1679318	ARSJ	0.470633	0.376506	0.0727944	NA	70.9264	3.65082	73.1408	NA	0.969724	NA	-0.0443536	2	2	2	2	2	2	0.75913	0.753243	Homo sapiens arylsulfatase family, member J (ARSJ), mRNA.
ILMN_1657050	ARSK	0	0.00301205	0.0386617	NA	217.343	5.94171	151.95	NA	1.43036	NA	0.51638	2	2	2	2	2	2	0.00230927	0.0361462	Homo sapiens arylsulfatase K (ARSK), mRNA.
ILMN_1807913	ART1	0.0210843	0.0150602	0.0349571	NA	96.5903	2.38756	104.277	NA	0.926283	NA	-0.110475	2	2	2	2	2	2	0.458125	0.657199	Homo sapiens ADP-ribosyltransferase 1 (ART1), mRNA.
ILMN_1693218	ART3	0.109187	0.287651	0.094815	NA	83.7903	5.61767	75.7257	NA	1.1065	NA	0.146	2	2	2	2	2	2	0.355679	0.608427	Homo sapiens ADP-ribosyltransferase 3 (ART3), mRNA.
ILMN_1805773	ART4	0.153614	0.0376506	0.0405046	NA	79.3885	2.27377	92.5695	NA	0.85761	NA	-0.221607	2	2	2	2	2	2	0.146333	0.427972	Homo sapiens ADP-ribosyltransferase 4 (Dombrock blood group) (ART4), mRNA.
ILMN_1733583	ART5	0.368223	0.230422	0.0556906	NA	72.9305	2.87194	77.144	NA	0.945382	NA	-0.0810307	2	2	2	2	2	2	0.58408	0.705766	Homo sapiens ADP-ribosyltransferase 5 (ART5), mRNA.
ILMN_2338733	ART5	0.145331	0.21988	0.0743087	NA	80.9976	4.25595	77.452	NA	1.04578	NA	0.0645776	2	2	2	2	2	2	0.678894	0.734194	Homo sapiens ADP-ribosyltransferase 5 (ART5), transcript variant 1, mRNA.
ILMN_1762952	ARTN	0.953313	0.39759	0.0180056	NA	59.157	0.753181	72.544	NA	0.815464	NA	-0.294307	2	2	2	2	2	2	0.0580596	0.267415	Homo sapiens artemin (ARTN), transcript variant 2, mRNA.
ILMN_1803691	ARTN	0.571536	0.713855	0.0349549	NA	68.7894	1.70026	66.5236	NA	1.03406	NA	0.0483195	2	2	2	2	2	2	0.74729	0.750549	Homo sapiens artemin (ARTN), transcript variant 2, mRNA.
ILMN_1773295	ARTN	0.286898	0.387048	0.100241	NA	75.9181	5.38114	72.8604	NA	1.04197	NA	0.0593072	2	2	2	2	2	2	0.717073	0.743481	Homo sapiens artemin (ARTN), transcript variant 3, mRNA.
ILMN_1727040	ARTN	0.473645	0.85994	0.0205415	NA	70.3846	1.02234	63.0828	NA	1.11575	NA	0.158014	2	2	2	2	2	2	0.293137	0.568992	Homo sapiens artemin (ARTN), transcript variant 1, mRNA.
ILMN_1800935	ARV1	0	0	0.0327236	NA	628.043	14.5323	531.22	NA	1.18226	NA	0.241553	2	2	2	2	2	2	0.115902	0.383037	Homo sapiens ARV1 homolog (S. cerevisiae) (ARV1), mRNA.
ILMN_1677226	ARVCF	0.0707831	0.230422	0.0588118	NA	86.2196	3.58555	77.1643	NA	1.11735	NA	0.160081	2	2	2	2	2	2	0.295724	0.570063	Homo sapiens armadillo repeat gene deletes in velocardiofacial syndrome (ARVCF), mRNA.
ILMN_1720205	ARVP6125	0.25753	0.269578	0.0794655	NA	76.0277	4.27204	76.1387	NA	0.998542	NA	-0.00210493	2	2	2	2	2	2	0.976869	0.798022	Homo sapiens hypothetical protein LOC442092 (ARVP6125), mRNA.
ILMN_1724162	ARX	0.443524	0.346386	0.0991767	NA	72.0915	5.05567	73.8688	NA	0.97594	NA	-0.0351361	2	2	2	2	2	2	0.800834	0.762726	Homo sapiens aristaless related homeobox (ARX), mRNA.
ILMN_1771732	AS3MT	0.154367	0.143072	0.0191187	NA	79.146	1.06997	80.3355	NA	0.985194	NA	-0.0215198	2	2	2	2	2	2	0.883639	0.780522	Homo sapiens arsenic (+3 oxidation state) methyltransferase (AS3MT), mRNA.
ILMN_1684054	ASAH1	0.00376506	0.00150602	0.0718162	NA	122.041	6.19745	162.83	NA	0.749501	NA	-0.415998	2	2	2	2	2	2	0.011188	0.101118	Homo sapiens N-acylsphingosine amidohydrolase (acid ceramidase) 1 (ASAH1), transcript variant 1, mRNA.
ILMN_1655509	ASAH1	0.0587349	0.0707831	0.0744664	NA	87.8489	4.62574	86.192	NA	1.01922	NA	0.0274704	2	2	2	2	2	2	0.865975	0.777367	Homo sapiens N-acylsphingosine amidohydrolase (acid ceramidase) 1 (ASAH1), transcript variant 2, mRNA.
ILMN_1780786	ASAH2	0.479669	0.474398	0.0427958	NA	70.3311	2.12831	71.029	NA	0.990175	NA	-0.0142446	2	2	2	2	2	2	0.920183	0.786015	Homo sapiens N-acylsphingosine amidohydrolase (non-lysosomal ceramidase) 2 (ASAH2), mRNA.
ILMN_2118773	ASAH2B	0.121988	0.0376506	0.0826643	NA	82.448	4.81929	92.5369	NA	0.890974	NA	-0.166544	2	2	2	2	2	2	0.272633	0.552577	Homo sapiens N-acylsphingosine amidohydrolase (non-lysosomal ceramidase) 2B (ASAH2B), mRNA.
ILMN_1656248	ASAM	0.000753012	0.0060241	0.00956118	NA	154.321	1.04333	114.826	NA	1.34396	NA	0.426488	2	2	2	2	2	2	0.00872124	0.0872134	Homo sapiens adipocyte-specific adhesion molecule (ASAM), mRNA.
ILMN_2233366	ASAP1	0	0.00150602	0.19024	NA	245.68	33.0488	161.196	NA	1.5241	NA	0.607961	2	2	2	2	2	2	0.00192036	0.0316783	Homo sapiens ArfGAP with SH3 domain, ankyrin repeat and PH domain 1 (ASAP1), mRNA.
ILMN_1685441	ASAP3	0	0	0.169509	NA	457.06	54.7837	566.444	NA	0.806892	NA	-0.309552	2	2	2	2	2	2	0.0620678	0.276427	Homo sapiens ArfGAP with SH3 domain, ankyrin repeat and PH domain 3 (ASAP3), mRNA.
ILMN_1683096	ASB1	0	0	0.0207735	NA	196.48	2.8861	221.687	NA	0.886291	NA	-0.174148	2	2	2	2	2	2	0.247267	0.532169	Homo sapiens ankyrin repeat and SOCS box-containing 1 (ASB1), mRNA.
ILMN_1781148	ASB10	0.15738	0.240964	0.0156859	NA	78.9377	0.875545	76.6699	NA	1.02958	NA	0.0420557	2	2	2	2	2	2	0.776726	0.756954	Homo sapiens ankyrin repeat and SOCS box-containing 10 (ASB10), mRNA.
ILMN_2272251	ASB11	0.0225904	0.0150602	0.14892	NA	102.711	10.8157	105.241	NA	0.975954	NA	-0.0351146	2	2	2	2	2	2	0.787567	0.759503	Homo sapiens ankyrin repeat and SOCS box-containing 11 (ASB11), transcript variant 1, mRNA.
ILMN_1722024	ASB11	0.255271	0.439759	0.0841588	NA	76.3978	4.54638	71.7104	NA	1.06537	NA	0.0913481	2	2	2	2	2	2	0.560172	0.697469	Homo sapiens ankyrin repeat and SOCS box-containing 11 (ASB11), transcript variant 2, mRNA.
ILMN_1651643	ASB11	0.158133	0.317771	0.310263	NA	94.0711	20.6382	74.7385	NA	1.25867	NA	0.3319	2	2	2	2	2	2	0.143412	0.423468	Homo sapiens ankyrin repeat and SOCS box-containing 11 (ASB11), transcript variant 2, mRNA.
ILMN_1656364	ASB12	0.215361	0.387048	0.0611786	NA	76.9231	3.32768	72.8627	NA	1.05573	NA	0.0782355	2	2	2	2	2	2	0.609097	0.71404	Homo sapiens ankyrin repeat and SOCS box-containing 12 (ASB12), mRNA.
ILMN_1654385	ASB13	0	0.00301205	0.086861	NA	212.156	13.0306	147.173	NA	1.44154	NA	0.527613	2	2	2	2	2	2	0.00241086	0.0371766	Homo sapiens ankyrin repeat and SOCS box-containing 13 (ASB13), mRNA.
ILMN_1753737	ASB14	0.3125	0.376506	0.0714393	NA	74.4554	3.76113	73.1784	NA	1.01745	NA	0.0249587	2	2	2	2	2	2	0.878043	0.780175	Homo sapiens ankyrin repeat and SOCS box-containing 14 (ASB14), mRNA.
ILMN_1740528	ASB15	0.814759	0.721386	0.057341	NA	63.7724	2.58573	66.34	NA	0.961296	NA	-0.0569481	2	2	2	2	2	2	0.698082	0.739419	Homo sapiens ankyrin repeat and SOCS box-containing 15 (ASB15), mRNA.
ILMN_1810881	ASB16	0.290663	0.135542	0.121262	NA	76.6577	6.57301	80.9217	NA	0.947307	NA	-0.0780958	2	2	2	2	2	2	0.594108	0.708836	Homo sapiens ankyrin repeat and SOCS box-containing 16 (ASB16), mRNA.
ILMN_2210101	ASB17	0.661898	0.968373	0.0674076	NA	67.0021	3.19361	57.5058	NA	1.16514	NA	0.220499	2	2	2	2	2	2	0.156471	0.440549	Homo sapiens ankyrin repeat and SOCS box-containing 17 (ASB17), mRNA.
ILMN_1795811	ASB2	0.317771	0.108434	0.0193901	NA	73.3234	1.00533	82.9837	NA	0.883588	NA	-0.178554	2	2	2	2	2	2	0.235895	0.521766	Homo sapiens ankyrin repeat and SOCS box-containing 2 (ASB2), mRNA.
ILMN_2358783	ASB3	0.000753012	0	0.0992592	NA	142.589	10.0078	182.284	NA	0.782236	NA	-0.354324	2	2	2	2	2	2	0.0288071	0.178952	Homo sapiens ankyrin repeat and SOCS box-containing 3 (ASB3), transcript variant 2, mRNA.
ILMN_1699606	ASB3	0	0	0.0657111	NA	522.582	24.2816	505.998	NA	1.03277	NA	0.0465236	2	2	2	2	2	2	0.764857	0.75374	Homo sapiens ankyrin repeat and SOCS box-containing 3 (ASB3), transcript variant 1, mRNA.
ILMN_1813668	ASB4	0.74247	0.570783	0.0348513	NA	65.7185	1.61954	69.1632	NA	0.950194	NA	-0.0737053	2	2	2	2	2	2	0.618475	0.71676	Homo sapiens ankyrin repeat and SOCS box-containing 4 (ASB4), transcript variant 2, mRNA.
ILMN_1702618	ASB4	0.289157	0.168675	0.090577	NA	75.4999	4.83559	79.1854	NA	0.953457	NA	-0.068761	2	2	2	2	2	2	0.638753	0.722369	Homo sapiens ankyrin repeat and SOCS box-containing 4 (ASB4), transcript variant 1, mRNA.
ILMN_1676066	ASB4	0.701054	0.865964	0.0717611	NA	66.0925	3.35372	62.7146	NA	1.05386	NA	0.0756842	2	2	2	2	2	2	0.625149	0.718232	Homo sapiens ankyrin repeat and SOCS box-containing 4 (ASB4), transcript variant 1, mRNA.
ILMN_2126055	ASB5	0.393825	0.743976	0.121311	NA	73.5879	6.31238	65.588	NA	1.12197	NA	0.166036	2	2	2	2	2	2	0.309539	0.579631	Homo sapiens ankyrin repeat and SOCS box-containing 5 (ASB5), mRNA.
ILMN_1655532	ASB6	0.494729	0.061747	0.0889225	NA	70.2395	4.4165	88.1126	NA	0.797156	NA	-0.327066	2	2	2	2	2	2	0.0406959	0.219953	Homo sapiens ankyrin repeat and SOCS box-containing 6 (ASB6), transcript variant 1, mRNA.
ILMN_1806705	ASB6	0.00225904	0.0060241	0.11754	NA	138.068	11.4753	120.945	NA	1.14158	NA	0.191036	2	2	2	2	2	2	0.240193	0.526046	Homo sapiens ankyrin repeat and SOCS box-containing 6 (ASB6), transcript variant 2, mRNA.
ILMN_2397776	ASB6	0	0.0060241	0.090153	NA	157.578	10.0452	125.732	NA	1.25328	NA	0.325706	2	2	2	2	2	2	0.0449304	0.233085	Homo sapiens ankyrin repeat and SOCS box-containing 6 (ASB6), transcript variant 2, mRNA.
ILMN_1744050	ASB7	0.15512	0.0677711	0.0421304	NA	79.2631	2.3613	87.1172	NA	0.909844	NA	-0.136309	2	2	2	2	2	2	0.362468	0.612214	Homo sapiens ankyrin repeat and SOCS box-containing 7 (ASB7), transcript variant 1, mRNA.
ILMN_1753040	ASB7	0.0361446	0.129518	0.0675797	NA	93.4573	4.46595	81.1538	NA	1.15161	NA	0.203649	2	2	2	2	2	2	0.18922	0.478068	Homo sapiens ankyrin repeat and SOCS box-containing 7 (ASB7), transcript variant 2, mRNA.
ILMN_1680419	ASB7	0.00301205	0.0301205	0.0710381	NA	128.74	6.46682	95.7048	NA	1.34518	NA	0.4278	2	2	2	2	2	2	0.00990513	0.0942968	Homo sapiens ankyrin repeat and SOCS box-containing 7 (ASB7), transcript variant 1, mRNA.
ILMN_2173740	ASB8	0.0188253	0.0105422	0.0868711	NA	99.0957	6.08717	109.042	NA	0.908789	NA	-0.137983	2	2	2	2	2	2	0.359951	0.611027	Homo sapiens ankyrin repeat and SOCS box-containing 8 (ASB8), mRNA.
ILMN_1786041	ASB9	0.756777	0.661145	0.0946285	NA	64.3725	4.30732	67.4707	NA	0.954081	NA	-0.0678163	2	2	2	2	2	2	0.642795	0.723646	Homo sapiens ankyrin repeat and SOCS box-containing 9 (ASB9), transcript variant 2, mRNA.
ILMN_2373728	ASB9	0.39759	0.346386	0.131335	NA	74.0016	6.87235	73.8099	NA	1.0026	NA	0.00374161	2	2	2	2	2	2	0.987289	0.799433	Homo sapiens ankyrin repeat and SOCS box-containing 9 (ASB9), transcript variant 2, mRNA.
ILMN_1685097	ASCC1	0	0	0.0160907	NA	997.321	11.3473	851.967	NA	1.17061	NA	0.22726	2	2	2	2	2	2	0.136034	0.412031	Homo sapiens activating signal cointegrator 1 complex subunit 1 (ASCC1), mRNA.
ILMN_1679919	ASCC2	0	0	0.247958	NA	909.191	159.411	1350.7	NA	0.673127	NA	-0.57105	2	2	2	2	2	2	0.00347157	0.0467735	Homo sapiens activating signal cointegrator 1 complex subunit 2 (ASCC2), mRNA.
ILMN_1797656	ASCC3	0.271837	0.0301205	0.111678	NA	76.7297	6.05921	95.4709	NA	0.803697	NA	-0.315276	2	2	2	2	2	2	0.0499249	0.247413	Homo sapiens activating signal cointegrator 1 complex subunit 3 (ASCC3), transcript variant 2, mRNA.
ILMN_1772177	ASCC3	0.225151	0.191265	0.100094	NA	78.1515	5.53137	78.1188	NA	1.00042	NA	0.000603751	2	2	2	2	2	2	0.984294	0.79901	Homo sapiens activating signal cointegrator 1 complex subunit 3 (ASCC3), transcript variant 1, mRNA.
ILMN_2294751	ASCC3	0.28991	0.472892	0.0279666	NA	74.0532	1.46443	71.0523	NA	1.04224	NA	0.059681	2	2	2	2	2	2	0.68907	0.736909	Homo sapiens activating signal cointegrator 1 complex subunit 3 (ASCC3), transcript variant 1, mRNA.
ILMN_1701653	ASCL1	0	0	0.0520773	NA	378.625	13.9425	322.159	NA	1.17527	NA	0.232997	2	2	2	2	2	2	0.131753	0.406274	Homo sapiens achaete-scute complex homolog 1 (Drosophila) (ASCL1), mRNA.
ILMN_1723412	ASCL2	0.100151	0.0888554	0.0397441	NA	82.8712	2.32895	84.2062	NA	0.984146	NA	-0.0230556	2	2	2	2	2	2	0.873712	0.778819	Homo sapiens achaete-scute complex homolog 2 (Drosophila) (ASCL2), mRNA.
ILMN_1695353	ASCL3	0.887048	0.322289	0.0684194	NA	61.4549	2.97318	74.631	NA	0.82345	NA	-0.280248	2	2	2	2	2	2	0.0727808	0.300337	Homo sapiens achaete-scute complex homolog 3 (Drosophila) (ASCL3), mRNA.
ILMN_1813075	ASCL4	0.684488	0.670181	0.0719756	NA	66.4618	3.38253	67.3349	NA	0.987033	NA	-0.0188293	2	2	2	2	2	2	0.890726	0.781615	Homo sapiens achaete-scute complex homolog 4 (Drosophila) (ASCL4), mRNA.
ILMN_1714737	ASF1A	0	0	0.00966312	NA	647.52	4.42441	725.293	NA	0.89277	NA	-0.16364	2	2	2	2	2	2	0.275662	0.554997	Homo sapiens ASF1 anti-silencing function 1 homolog A (S. cerevisiae) (ASF1A), mRNA.
ILMN_1695414	ASF1B	0	0	0.138873	NA	246.333	24.1895	320.44	NA	0.768734	NA	-0.379443	2	2	2	2	2	2	0.0231421	0.156757	Homo sapiens ASF1 anti-silencing function 1 homolog B (S. cerevisiae) (ASF1B), mRNA.
ILMN_1769013	ASGR1	0.000753012	0	0.0427476	NA	149.59	4.52167	182.065	NA	0.821628	NA	-0.283443	2	2	2	2	2	2	0.06802	0.290145	Homo sapiens asialoglycoprotein receptor 1 (ASGR1), mRNA.
ILMN_1694966	ASGR2	0.446536	0.186747	0.026095	NA	70.9005	1.30825	78.3734	NA	0.904649	NA	-0.14457	2	2	2	2	2	2	0.334202	0.595972	Homo sapiens asialoglycoprotein receptor 2 (ASGR2), transcript variant 3, mRNA.
ILMN_1700340	ASGR2	0.893825	0.939759	0.0864526	NA	60.9906	3.72843	59.7845	NA	1.02017	NA	0.0288153	2	2	2	2	2	2	0.863578	0.776798	Homo sapiens asialoglycoprotein receptor 2 (ASGR2), transcript variant H2', mRNA.
ILMN_2342638	ASGR2	0.300452	0.406627	0.0191107	NA	73.8345	0.997746	72.2611	NA	1.02177	NA	0.0310766	2	2	2	2	2	2	0.834359	0.771095	Homo sapiens asialoglycoprotein receptor 2 (ASGR2), transcript variant 3, mRNA.
ILMN_1782032	ASH1L	0.0753012	0.159639	0.0269524	NA	85.5797	1.631	79.4604	NA	1.07701	NA	0.107034	2	2	2	2	2	2	0.474021	0.664001	Homo sapiens ash1 (absent, small, or homeotic)-like (Drosophila) (ASH1L), mRNA.
ILMN_1666933	ASH2L	0	0	0.00581216	NA	3117.96	12.8142	3542.98	NA	0.880039	NA	-0.18436	2	2	2	2	2	2	0.22129	0.508322	Homo sapiens ash2 (absent, small, or homeotic)-like (Drosophila) (ASH2L), mRNA.
ILMN_1791647	ASIP	0.927711	0.896084	0.0085527	NA	60.6514	0.3668	61.8427	NA	0.980736	NA	-0.0280632	2	2	2	2	2	2	0.849267	0.773446	Homo sapiens agouti signaling protein, nonagouti homolog (mouse) (ASIP), mRNA.
ILMN_2379393	ASL	0	0	0.0110797	NA	198.212	1.5529	291.806	NA	0.679258	NA	-0.557969	2	2	2	2	2	2	0.00114688	0.0225453	Homo sapiens argininosuccinate lyase (ASL), transcript variant 1, mRNA.
ILMN_1685037	ASL	0.000753012	0	0.0595613	NA	160.475	6.75861	171.524	NA	0.935584	NA	-0.0960613	2	2	2	2	2	2	0.517934	0.68236	Homo sapiens argininosuccinate lyase (ASL), transcript variant 3, mRNA.
ILMN_1685142	ASL	0.164157	0.349398	0.0591559	NA	79.1597	3.31121	73.686	NA	1.07428	NA	0.103374	2	2	2	2	2	2	0.497803	0.674428	Homo sapiens argininosuccinate lyase (ASL), transcript variant 2, mRNA.
ILMN_1690595	ASMT	0.850151	0.421687	0.0354498	NA	63.2905	1.58649	72.0009	NA	0.879024	NA	-0.186026	2	2	2	2	2	2	0.218354	0.505312	Homo sapiens acetylserotonin O-methyltransferase (ASMT), mRNA.
ILMN_1804384	ASMTL	0.0203313	0.00301205	0.0259031	NA	98.2891	1.80029	154.959	NA	0.634292	NA	-0.656781	2	2	2	2	2	2	0.000250193	0.00796567	Homo sapiens acetylserotonin O-methyltransferase-like (ASMTL), mRNA.
ILMN_1657571	ASNA1	0.0542169	0.0376506	0.116878	NA	90.5276	7.4817	92.278	NA	0.981032	NA	-0.0276284	2	2	2	2	2	2	0.834038	0.771006	Homo sapiens arsA arsenite transporter, ATP-binding, homolog 1 (bacterial) (ASNA1), mRNA.
ILMN_2398107	ASNS	0	0	0.058243	NA	288.555	11.8838	178.482	NA	1.61671	NA	0.693064	2	2	2	2	2	2	0.000163247	0.00593439	Homo sapiens asparagine synthetase (ASNS), transcript variant 1, mRNA.
ILMN_1796417	ASNS	0	0	0.12172	NA	4592.32	395.257	1797.74	NA	2.5545	NA	1.35304	2	2	2	2	2	2	4.47947e-08	1.41828e-05	Homo sapiens asparagine synthetase (ASNS), transcript variant 1, mRNA.
ILMN_2221673	ASNSD1	0	0	0.0375579	NA	1600.98	42.518	1254.17	NA	1.27653	NA	0.352223	2	2	2	2	2	2	0.0268593	0.172137	Homo sapiens asparagine synthetase domain containing 1 (ASNSD1), mRNA.
ILMN_1692824	ASPA	0.526355	0.739458	0.0985255	NA	69.7033	4.85609	65.6418	NA	1.06187	NA	0.0866117	2	2	2	2	2	2	0.588927	0.707413	Homo sapiens aspartoacylase (Canavan disease) (ASPA), transcript variant 1, mRNA.
ILMN_2352934	ASPH	0.00451807	0.0060241	0.0533794	NA	120.041	4.53093	125.178	NA	0.958963	NA	-0.0604536	2	2	2	2	2	2	0.681199	0.734789	Homo sapiens aspartate beta-hydroxylase (ASPH), transcript variant 2, mRNA.
ILMN_1739719	ASPH	0.432982	0.570783	0.0771828	NA	71.5912	3.90719	69.1713	NA	1.03498	NA	0.0496082	2	2	2	2	2	2	0.75374	0.752409	Homo sapiens aspartate beta-hydroxylase (ASPH), transcript variant 1, mRNA.
ILMN_1693771	ASPH	0.518072	0.88253	0.070592	NA	69.858	3.48704	62.1684	NA	1.12369	NA	0.168243	2	2	2	2	2	2	0.276544	0.555784	Homo sapiens aspartate beta-hydroxylase (ASPH), transcript variant 1, mRNA.
ILMN_1662390	ASPHD1	0.176205	0.411145	0.0204535	NA	78.3473	1.13312	72.1125	NA	1.08646	NA	0.119633	2	2	2	2	2	2	0.423284	0.642385	Homo sapiens aspartate beta-hydroxylase domain containing 1 (ASPHD1), mRNA.
ILMN_1708950	ASPHD1	0.0316265	0.195783	0.0528502	NA	93.7047	3.50181	78.0371	NA	1.20077	NA	0.263961	2	2	2	2	2	2	0.0903369	0.338875	Homo sapiens aspartate beta-hydroxylase domain containing 1 (ASPHD1), mRNA.
ILMN_2167426	ASPHD2	0.00301205	0.0060241	0.0681722	NA	123.142	5.93605	123.385	NA	0.99803	NA	-0.00284506	2	2	2	2	2	2	0.975997	0.797895	Homo sapiens aspartate beta-hydroxylase domain containing 2 (ASPHD2), mRNA.
ILMN_1815184	ASPM	0	0	0.0727137	NA	519.726	26.7224	496.12	NA	1.04758	NA	0.0670632	2	2	2	2	2	2	0.666273	0.731441	Homo sapiens asp (abnormal spindle) homolog, microcephaly associated (Drosophila) (ASPM), mRNA.
ILMN_2168166	ASPN	0.447289	0.308735	0.111711	NA	71.9306	5.68189	75.0865	NA	0.95797	NA	-0.0619478	2	2	2	2	2	2	0.668271	0.732084	Homo sapiens asporin (ASPN), mRNA.
ILMN_1762284	ASPRV1	0.00225904	0.0225904	0.0887065	NA	136.729	8.57631	98.1956	NA	1.39241	NA	0.477586	2	2	2	2	2	2	0.0051599	0.0611655	Homo sapiens aspartic peptidase, retroviral-like 1 (ASPRV1), mRNA.
ILMN_1660749	ASPSCR1	0	0	0.161814	NA	1357.36	155.31	1518.36	NA	0.893966	NA	-0.161708	2	2	2	2	2	2	0.2981	0.572445	Homo sapiens alveolar soft part sarcoma chromosome region, candidate 1 (ASPSCR1), mRNA.
ILMN_1661860	ASPSCR1	0.0135542	0.0060241	0.0984858	NA	105.051	7.31579	112.751	NA	0.931711	NA	-0.102046	2	2	2	2	2	2	0.493497	0.673114	PREDICTED: Homo sapiens alveolar soft part sarcoma chromosome region, candidate 1 (ASPSCR1), mRNA.
ILMN_1810199	ASRGL1	0	0	0.0179845	NA	303.672	3.86178	391.381	NA	0.775897	NA	-0.366063	2	2	2	2	2	2	0.0213706	0.149558	Homo sapiens asparaginase like 1 (ASRGL1), mRNA.
ILMN_2395451	ASS1	0	0	0.0614885	NA	296.009	12.8702	196.138	NA	1.50919	NA	0.593771	2	2	2	2	2	2	0.000762322	0.0170052	Homo sapiens argininosuccinate synthetase 1 (ASS1), transcript variant 2, mRNA.
ILMN_1708778	ASS1	0	0	0.0213603	NA	947.333	14.3085	477.067	NA	1.98575	NA	0.989681	2	2	2	2	2	2	1.84421e-06	0.00024461	Homo sapiens argininosuccinate synthetase 1 (ASS1), transcript variant 1, mRNA.
ILMN_1803813	ASTE1	0.0587349	0.0060241	0.0835046	NA	87.906	5.19056	112.51	NA	0.781314	NA	-0.356025	2	2	2	2	2	2	0.0270973	0.172904	Homo sapiens asteroid homolog 1 (Drosophila) (ASTE1), mRNA.
ILMN_1728055	ASTL	0.0534639	0.126506	0.0544106	NA	89.3861	3.43905	81.4659	NA	1.09722	NA	0.133855	2	2	2	2	2	2	0.379046	0.621201	Homo sapiens astacin-like metallo-endopeptidase (M12 family) (ASTL), mRNA.
ILMN_1702189	ASTN1	0.17244	0.0286145	0.0605424	NA	78.7669	3.372	96.5756	NA	0.815598	NA	-0.29407	2	2	2	2	2	2	0.0602587	0.272305	Homo sapiens astrotactin 1 (ASTN1), transcript variant 2, mRNA.
ILMN_1684959	ASTN1	0.174699	0.286145	0.0363321	NA	78.3547	2.01299	75.7718	NA	1.03409	NA	0.0483594	2	2	2	2	2	2	0.74736	0.750551	Homo sapiens astrotactin 1 (ASTN1), transcript variant 1, mRNA.
ILMN_2381559	ASTN2	0.396084	0.295181	0.0218012	NA	71.7355	1.10586	75.5881	NA	0.949031	NA	-0.0754721	2	2	2	2	2	2	0.610428	0.714455	Homo sapiens astrotactin 2 (ASTN2), transcript variant 3, mRNA.
ILMN_1797283	ASTN2	0.0768072	0.0768072	0.0741387	NA	85.7862	4.49726	85.3202	NA	1.00546	NA	0.00785855	2	2	2	2	2	2	0.968935	0.797024	Homo sapiens astrotactin 2 (ASTN2), transcript variant 4, mRNA.
ILMN_1744118	ASTN2	0.0587349	0.34488	0.0134313	NA	87.61	0.832066	73.9349	NA	1.18496	NA	0.244839	2	2	2	2	2	2	0.109748	0.372192	Homo sapiens astrotactin 2 (ASTN2), transcript variant 2, mRNA.
ILMN_1726025	ASXL1	0	0	0.0428399	NA	326.815	9.90001	190.806	NA	1.71282	NA	0.776371	2	2	2	2	2	2	4.29831e-05	0.00225005	Homo sapiens additional sex combs like 1 (Drosophila) (ASXL1), mRNA.
ILMN_1698968	ASXL2	0	0	0.0263762	NA	507.056	9.45701	469.187	NA	1.08071	NA	0.11198	2	2	2	2	2	2	0.453981	0.654555	Homo sapiens additional sex combs like 2 (Drosophila) (ASXL2), mRNA.
ILMN_2048957	ASZ1	0.985693	0.981928	0.0212192	NA	56.4933	0.84764	55.7312	NA	1.01367	NA	0.0195936	2	2	2	2	2	2	0.895528	0.782402	Homo sapiens ankyrin repeat, SAM and basic leucine zipper domain containing 1 (ASZ1), mRNA.
ILMN_2169983	ATAD1	0.134789	0.0963855	0.228001	NA	89.266	14.3916	83.6512	NA	1.06712	NA	0.0937249	2	2	2	2	2	2	0.670932	0.732633	Homo sapiens ATPase family, AAA domain containing 1 (ATAD1), mRNA.
ILMN_2048700	ATAD2	0	0	0.0600829	NA	391.956	16.6522	263.54	NA	1.48727	NA	0.572669	2	2	2	2	2	2	0.00104824	0.0213582	Homo sapiens ATPase family, AAA domain containing 2 (ATAD2), mRNA.
ILMN_1738530	ATAD3A	0	0	0.0900284	NA	807.167	51.384	763.413	NA	1.05731	NA	0.0804042	2	2	2	2	2	2	0.612154	0.71496	Homo sapiens ATPase family, AAA domain containing 3A (ATAD3A), mRNA.
ILMN_2131936	ATAD3B	0	0	0.0298451	NA	477.925	10.086	431.919	NA	1.10652	NA	0.146025	2	2	2	2	2	2	0.331702	0.594814	Homo sapiens ATPase family, AAA domain containing 3B (ATAD3B), mRNA.
ILMN_2231569	ATAD3C	0.529367	0.748494	0.0178793	NA	69.461	0.878168	65.47	NA	1.06096	NA	0.0853691	2	2	2	2	2	2	0.565974	0.69902	Homo sapiens ATPase family, AAA domain containing 3C (ATAD3C), mRNA. XM_937413 XM_943284 XM_943293 XM_943297
ILMN_1656576	ATCAY	0.190512	0.314759	0.0133387	NA	77.482	0.730802	74.9627	NA	1.03361	NA	0.0476884	2	2	2	2	2	2	0.747604	0.7506	Homo sapiens ataxia, cerebellar, Cayman type (caytaxin) (ATCAY), mRNA.
ILMN_2381769	ATE1	0.746235	0.61747	0.0478772	NA	65.5825	2.22025	68.3176	NA	0.959965	NA	-0.0589467	2	2	2	2	2	2	0.688928	0.736909	Homo sapiens arginyltransferase 1 (ATE1), transcript variant 2, mRNA.
ILMN_1791400	ATE1	0.121988	0.114458	0.157669	NA	86.4448	9.63761	82.3959	NA	1.04914	NA	0.069206	2	2	2	2	2	2	0.70982	0.741898	Homo sapiens arginyltransferase 1 (ATE1), transcript variant 1, mRNA.
ILMN_1756867	ATE1	0.0474398	0.0542169	0.169635	NA	95.129	11.4108	88.5933	NA	1.07377	NA	0.102689	2	2	2	2	2	2	0.574354	0.701225	Homo sapiens arginyltransferase 1 (ATE1), transcript variant 2, mRNA.
ILMN_1801923	ATF1	0.191265	0.15512	0.157375	NA	81.8834	9.11205	79.6697	NA	1.02779	NA	0.0395388	2	2	2	2	2	2	0.849933	0.773678	Homo sapiens activating transcription factor 1 (ATF1), mRNA.
ILMN_1748271	ATF2	0	0	0.0949857	NA	226.006	15.1797	202.488	NA	1.11614	NA	0.158522	2	2	2	2	2	2	0.316158	0.584504	Homo sapiens activating transcription factor 2 (ATF2), mRNA.
ILMN_1661109	ATF3	0.711596	0.64759	0.0355035	NA	66.4035	1.66705	67.7729	NA	0.979794	NA	-0.029449	2	2	2	2	2	2	0.840394	0.771977	Homo sapiens activating transcription factor 3 (ATF3), transcript variant 3, mRNA.
ILMN_1791346	ATF3	0.0572289	0.730422	0.0316449	NA	87.8051	1.96475	66.0361	NA	1.32965	NA	0.41105	2	2	2	2	2	2	0.0112907	0.101483	Homo sapiens activating transcription factor 3 (ATF3), transcript variant 4, mRNA.
ILMN_2374865	ATF3	0	0	0.0912532	NA	903.062	58.2707	198.941	NA	4.53935	NA	2.18249	2	2	2	2	2	2	1.0947e-11	3.95408e-08	Homo sapiens activating transcription factor 3 (ATF3), transcript variant 4, mRNA.
ILMN_1672128	ATF4	0	0	0.176096	NA	2452.22	305.347	2724.77	NA	0.899973	NA	-0.152046	2	2	2	2	2	2	0.327676	0.593117	Homo sapiens activating transcription factor 4 (tax-responsive enhancer element B67) (ATF4), transcript variant 1, mRNA.
ILMN_2358457	ATF4	0	0	0.062472	NA	189.33	8.36352	202.661	NA	0.934216	NA	-0.098172	2	2	2	2	2	2	0.509027	0.678932	Homo sapiens activating transcription factor 4 (tax-responsive enhancer element B67) (ATF4), transcript variant 2, mRNA.
ILMN_1783394	ATF4	0.0549699	0.0376506	0.191836	NA	95.4288	12.9447	92.3018	NA	1.03388	NA	0.0480667	2	2	2	2	2	2	0.836328	0.771173	Homo sapiens activating transcription factor 4 (tax-responsive enhancer element B67) (ATF4), transcript variant 1, mRNA.
ILMN_1669113	ATF5	0	0	0.0801452	NA	471.055	26.6952	338.695	NA	1.39079	NA	0.475909	2	2	2	2	2	2	0.00505456	0.0604692	Homo sapiens activating transcription factor 5 (ATF5), mRNA.
ILMN_1703471	ATF6	0	0	0.00619659	NA	841.996	3.68933	640.526	NA	1.31454	NA	0.394555	2	2	2	2	2	2	0.01403	0.116172	Homo sapiens activating transcription factor 6 (ATF6), mRNA.
ILMN_1706967	ATF7	0.203313	0.108434	0.00781885	NA	77.0303	0.425882	82.661	NA	0.931881	NA	-0.101782	2	2	2	2	2	2	0.493464	0.673114	Homo sapiens activating transcription factor 7 (ATF7), mRNA.
ILMN_1716435	ATF7IP	0.0677711	0.0225904	0.104724	NA	88.6271	6.56293	98.3035	NA	0.901566	NA	-0.149495	2	2	2	2	2	2	0.32498	0.591074	Homo sapiens activating transcription factor 7 interacting protein (ATF7IP), mRNA.
ILMN_1804445	ATF7IP2	0.000753012	0	0.0300261	NA	153.996	3.26958	207.903	NA	0.74071	NA	-0.43302	2	2	2	2	2	2	0.00802238	0.0824941	Homo sapiens activating transcription factor 7 interacting protein 2 (ATF7IP2), mRNA.
ILMN_2206098	ATG10	0	0	0.0147508	NA	321.115	3.34936	230.498	NA	1.39313	NA	0.478335	2	2	2	2	2	2	0.00397137	0.0510536	Homo sapiens ATG10 autophagy related 10 homolog (S. cerevisiae) (ATG10), mRNA.
ILMN_2188204	ATG12	0	0	0.0663541	NA	1424.24	66.8245	1513.82	NA	0.940824	NA	-0.0880039	2	2	2	2	2	2	0.552728	0.69456	Homo sapiens ATG12 autophagy related 12 homolog (S. cerevisiae) (ATG12), mRNA.
ILMN_2365881	ATG16L1	0	0	0.019049	NA	962.525	12.9649	1036.53	NA	0.928603	NA	-0.106866	2	2	2	2	2	2	0.472486	0.663449	Homo sapiens ATG16 autophagy related 16-like 1 (S. cerevisiae) (ATG16L1), transcript variant 2, mRNA.
ILMN_1725707	ATG16L1	0	0	0.192795	NA	816.853	111.359	753.774	NA	1.08368	NA	0.115943	2	2	2	2	2	2	0.543937	0.69241	Homo sapiens ATG16 autophagy related 16-like 1 (S. cerevisiae) (ATG16L1), transcript variant 1, mRNA.
ILMN_1664644	ATG16L2	0.0225904	0.0256024	0.130602	NA	101.713	9.3932	97.8541	NA	1.03944	NA	0.055804	2	2	2	2	2	2	0.752605	0.752292	Homo sapiens ATG16 autophagy related 16-like 2 (S. cerevisiae) (ATG16L2), mRNA.
ILMN_1756006	ATG2A	0	0	0.0710112	NA	194.769	9.77986	249.458	NA	0.78077	NA	-0.35703	2	2	2	2	2	2	0.0260276	0.168846	Homo sapiens ATG2 autophagy related 2 homolog A (S. cerevisiae) (ATG2A), mRNA.
ILMN_1735006	ATG2B	0.0060241	0.0060241	0.0612191	NA	115.953	5.01943	122.366	NA	0.947593	NA	-0.0776607	2	2	2	2	2	2	0.599296	0.710134	Homo sapiens ATG2 autophagy related 2 homolog B (S. cerevisiae) (ATG2B), mRNA.
ILMN_2163732	ATG3	0.0504518	0.0331325	0.0434903	NA	89.7659	2.7605	94.1652	NA	0.953281	NA	-0.0690273	2	2	2	2	2	2	0.640355	0.722813	Homo sapiens ATG3 autophagy related 3 homolog (S. cerevisiae) (ATG3), mRNA.
ILMN_2313782	ATG4A	0	0	0.131965	NA	405.451	37.8338	496.72	NA	0.816256	NA	-0.292906	2	2	2	2	2	2	0.0692806	0.29266	Homo sapiens ATG4 autophagy related 4 homolog A (S. cerevisiae) (ATG4A), transcript variant 2, mRNA.
ILMN_1768960	ATG4A	0.549699	0.483434	0.0380601	NA	69.0731	1.85893	70.7804	NA	0.975879	NA	-0.0352257	2	2	2	2	2	2	0.809928	0.764709	Homo sapiens ATG4 autophagy related 4 homolog A (S. cerevisiae) (ATG4A), transcript variant 3, mRNA.
ILMN_1691173	ATG4B	0.86747	0.528614	0.069819	NA	62.1139	3.06653	69.9404	NA	0.888097	NA	-0.171211	2	2	2	2	2	2	0.258551	0.541609	Homo sapiens ATG4 autophagy related 4 homolog B (S. cerevisiae) (ATG4B), transcript variant 1, mRNA.
ILMN_2411915	ATG4B	0	0	0.061274	NA	1775.85	76.9426	1670.84	NA	1.06284	NA	0.0879311	2	2	2	2	2	2	0.565119	0.698854	Homo sapiens ATG4 autophagy related 4 homolog B (S. cerevisiae) (ATG4B), transcript variant 2, mRNA.
ILMN_2383727	ATG4C	0.792169	0.930723	0.0758053	NA	64.0169	3.43146	60.6928	NA	1.05477	NA	0.0769282	2	2	2	2	2	2	0.621146	0.717031	Homo sapiens ATG4 autophagy related 4 homolog C (S. cerevisiae) (ATG4C), transcript variant 7, mRNA.
ILMN_2180315	ATG4D	0.223645	0.552711	0.0592419	NA	76.5721	3.20763	69.4286	NA	1.10289	NA	0.141289	2	2	2	2	2	2	0.355158	0.608276	Homo sapiens ATG4 autophagy related 4 homolog D (S. cerevisiae) (ATG4D), mRNA.
ILMN_1718265	ATG5	0.0180723	0.0060241	0.0222013	NA	99.1675	1.5568	124.81	NA	0.794547	NA	-0.331796	2	2	2	2	2	2	0.0348585	0.200939	Homo sapiens ATG5 autophagy related 5 homolog (S. cerevisiae) (ATG5), mRNA.
ILMN_1790978	ATG7	0	0	0.0323498	NA	297.782	6.8117	270.424	NA	1.10117	NA	0.139038	2	2	2	2	2	2	0.355319	0.608276	Homo sapiens ATG7 autophagy related 7 homolog (S. cerevisiae) (ATG7), mRNA.
ILMN_2296290	ATG9A	0.534639	0.439759	0.00251888	NA	69.3946	0.1236	71.6947	NA	0.967917	NA	-0.0470445	2	2	2	2	2	2	0.750393	0.75172	Homo sapiens ATG9 autophagy related 9 homolog A (S. cerevisiae) (ATG9A), transcript variant 1, mRNA.
ILMN_1739008	ATG9A	0	0	0.000856917	NA	297.041	0.179986	297.082	NA	0.999862	NA	-0.000198532	2	2	2	2	2	2	0.998926	0.800302	Homo sapiens ATG9 autophagy related 9 homolog A (S. cerevisiae) (ATG9A), transcript variant 1, mRNA.
ILMN_2410975	ATG9A	0	0	0.190186	NA	504.127	67.796	402.852	NA	1.2514	NA	0.32354	2	2	2	2	2	2	0.0757816	0.306905	Homo sapiens ATG9 autophagy related 9 homolog A (S. cerevisiae) (ATG9A), transcript variant 1, mRNA.
ILMN_1734655	ATG9B	0.833584	0.346386	0.00908234	NA	63.7842	0.409634	73.8862	NA	0.863276	NA	-0.212106	2	2	2	2	2	2	0.162059	0.448168	Homo sapiens ATG9 autophagy related 9 homolog B (S. cerevisiae) (ATG9B), mRNA.
ILMN_1794707	ATHL1	0.000753012	0.00150602	0.0774044	NA	161.432	8.8357	159.546	NA	1.01182	NA	0.0169537	2	2	2	2	2	2	0.922034	0.786409	Homo sapiens ATH1, acid trehalase-like 1 (yeast) (ATHL1), mRNA.
ILMN_1673991	ATIC	0	0	0.0536205	NA	4926.54	186.792	4500.03	NA	1.09478	NA	0.130643	2	2	2	2	2	2	0.390189	0.627382	Homo sapiens 5-aminoimidazole-4-carboxamide ribonucleotide formyltransferase/IMP cyclohydrolase (ATIC), mRNA.
ILMN_1716384	ATL2	0	0	0.0146243	NA	601.648	6.22161	427.032	NA	1.40891	NA	0.494576	2	2	2	2	2	2	0.00309039	0.0439921	Homo sapiens atlastin GTPase 2 (ATL2), mRNA.
ILMN_1751086	ATL3	0	0	0.0629834	NA	330.902	14.7371	346.746	NA	0.954309	NA	-0.067472	2	2	2	2	2	2	0.646796	0.725007	Homo sapiens atlastin GTPase 3 (ATL3), mRNA.
ILMN_1713630	ATM	0.256777	0.316265	0.001801	NA	75.0695	0.095601	74.8908	NA	1.00239	NA	0.00343846	2	2	2	2	2	2	0.981432	0.798545	Homo sapiens ataxia telangiectasia mutated (ATM), transcript variant 1, mRNA.
ILMN_2370825	ATM	0	0	0.0101184	NA	290.705	2.07992	271.681	NA	1.07002	NA	0.0976407	2	2	2	2	2	2	0.511319	0.679989	Homo sapiens ataxia telangiectasia mutated (ATM), transcript variant 1, mRNA.
ILMN_1716231	ATM	0.817018	0.987952	0.0137936	NA	64.2008	0.626187	54.7105	NA	1.17346	NA	0.230774	2	2	2	2	2	2	0.130291	0.404068	Homo sapiens ataxia telangiectasia mutated (ATM), transcript variant 2, mRNA.
ILMN_2223720	ATMIN	0.221386	0.346386	0.0767027	NA	77.2048	4.18736	73.7663	NA	1.04661	NA	0.065728	2	2	2	2	2	2	0.674398	0.733485	Homo sapiens ATM interactor (ATMIN), mRNA.
ILMN_1711210	ATN1	0.814006	0.829819	0.0324826	NA	64.0344	1.47079	63.6621	NA	1.00585	NA	0.00841313	2	2	2	2	2	2	0.956803	0.794445	Homo sapiens atrophin 1 (ATN1), transcript variant 1, mRNA.
ILMN_2373830	ATN1	0.00225904	0.0060241	0.211808	NA	137.197	20.5482	113.415	NA	1.20969	NA	0.274642	2	2	2	2	2	2	0.144359	0.424859	Homo sapiens atrophin 1 (ATN1), transcript variant 2, mRNA.
ILMN_1737833	ATN1	0	0	0.225691	NA	460.719	73.5251	344.427	NA	1.33764	NA	0.419687	2	2	2	2	2	2	0.0314759	0.188608	Homo sapiens atrophin 1 (ATN1), transcript variant 1, mRNA.
ILMN_1740671	ATOH1	0.673946	0.349398	0.0480835	NA	66.9924	2.27775	73.703	NA	0.908951	NA	-0.137726	2	2	2	2	2	2	0.357944	0.609847	Homo sapiens atonal homolog 1 (Drosophila) (ATOH1), mRNA.
ILMN_2168228	ATOH7	0.694277	0.600904	0.0775103	NA	66.2212	3.62946	68.6413	NA	0.964743	NA	-0.051783	2	2	2	2	2	2	0.721502	0.74442	Homo sapiens atonal homolog 7 (Drosophila) (ATOH7), mRNA.
ILMN_1654065	ATOH8	0.289157	0.762048	0.100073	NA	75.8074	5.36432	65.1116	NA	1.16427	NA	0.219424	2	2	2	2	2	2	0.170171	0.457227	Homo sapiens atonal homolog 8 (Drosophila) (ATOH8), mRNA.
ILMN_1670609	ATOX1	0	0	0.0557574	NA	1741.14	68.6468	1901.45	NA	0.915689	NA	-0.12707	2	2	2	2	2	2	0.395687	0.630188	Homo sapiens ATX1 antioxidant protein 1 homolog (yeast) (ATOX1), mRNA.
ILMN_1813434	ATP10A	0.0527108	0.0120482	0.0323762	NA	88.6795	2.03018	107.136	NA	0.827731	NA	-0.272767	2	2	2	2	2	2	0.0775594	0.311002	Homo sapiens ATPase, Class V, type 10A (ATP10A), mRNA.
ILMN_1656159	ATP10D	0.112952	0.850904	0.00215043	NA	81.4011	0.123777	63.2653	NA	1.28666	NA	0.363634	2	2	2	2	2	2	0.0220269	0.15214	Homo sapiens ATPase, class V, type 10D (ATP10D), mRNA.
ILMN_1674217	ATP11A	0.694277	0.245482	0.0920434	NA	65.9446	4.29197	76.4966	NA	0.86206	NA	-0.21414	2	2	2	2	2	2	0.165286	0.451887	Homo sapiens ATPase, class VI, type 11A (ATP11A), transcript variant 1, mRNA.
ILMN_1768783	ATP11A	0.744729	0.825301	0.0202368	NA	65.4937	0.937189	63.8058	NA	1.02645	NA	0.0376691	2	2	2	2	2	2	0.799927	0.76264	Homo sapiens ATPase, class VI, type 11A (ATP11A), transcript variant 2, mRNA.
ILMN_2124155	ATP11B	0.0406627	0.0331325	0.0313779	NA	90.8103	2.01485	93.6219	NA	0.969968	NA	-0.0439911	2	2	2	2	2	2	0.765112	0.753793	Homo sapiens ATPase, class VI, type 11B (ATP11B), mRNA.
ILMN_2389810	ATP11C	0	0	0.184308	NA	179.491	23.3923	167.718	NA	1.07019	NA	0.0978706	2	2	2	2	2	2	0.60827	0.713735	Homo sapiens ATPase, class VI, type 11C (ATP11C), transcript variant 1, mRNA.
ILMN_1661428	ATP11C	0.00376506	0.00903614	0.0514677	NA	119.607	4.35287	111.035	NA	1.0772	NA	0.107287	2	2	2	2	2	2	0.479034	0.666199	Homo sapiens ATPase, class VI, type 11C (ATP11C), transcript variant 1, mRNA.
ILMN_1687765	ATP12A	0.111446	0.0301205	0.0318352	NA	81.6917	1.83895	95.3674	NA	0.856601	NA	-0.223305	2	2	2	2	2	2	0.142911	0.422561	Homo sapiens ATPase, H+/K+ transporting, nongastric, alpha polypeptide (ATP12A), mRNA.
ILMN_2134224	ATP13A1	0	0	0.0857731	NA	199.227	12.0833	254.911	NA	0.781556	NA	-0.355578	2	2	2	2	2	2	0.027406	0.173993	Homo sapiens ATPase type 13A1 (ATP13A1), mRNA.
ILMN_1704164	ATP13A2	0	0	0.241223	NA	409.106	69.7816	469.889	NA	0.870644	NA	-0.199845	2	2	2	2	2	2	0.224739	0.511069	Homo sapiens ATPase type 13A2 (ATP13A2), mRNA.
ILMN_1651303	ATP13A4	0.58509	0.546687	0.0959381	NA	68.3235	4.63497	69.534	NA	0.982592	NA	-0.0253356	2	2	2	2	2	2	0.851362	0.773702	Homo sapiens ATPase type 13A4 (ATP13A4), mRNA.
ILMN_1775285	ATP13A5	0.483434	0.545181	0.206441	NA	73.4626	10.7238	69.6349	NA	1.05497	NA	0.0771992	2	2	2	2	2	2	0.718427	0.743597	Homo sapiens ATPase type 13A5 (ATP13A5), mRNA.
ILMN_2415189	ATP1A1	0	0	0.027926	NA	3163.31	62.4648	2655.74	NA	1.19112	NA	0.252322	2	2	2	2	2	2	0.101006	0.357708	Homo sapiens ATPase, Na+/K+ transporting, alpha 1 polypeptide (ATP1A1), transcript variant 2, mRNA.
ILMN_1775566	ATP1A1	0	0	0.0300181	NA	690.599	14.6587	570.462	NA	1.2106	NA	0.275718	2	2	2	2	2	2	0.0751884	0.305963	Homo sapiens ATPase, Na+/K+ transporting, alpha 1 polypeptide (ATP1A1), transcript variant 1, mRNA.
ILMN_1731783	ATP1A1	0	0	0.115767	NA	1981.49	162.205	1530.52	NA	1.29466	NA	0.37257	2	2	2	2	2	2	0.0268357	0.172097	Homo sapiens ATPase, Na+/K+ transporting, alpha 1 polypeptide (ATP1A1), transcript variant 1, mRNA.
ILMN_1777411	ATP1A2	0.833584	0.823795	0.0209906	NA	63.8812	0.948164	63.8477	NA	1.00052	NA	0.000756542	2	2	2	2	2	2	0.996777	0.800302	Homo sapiens ATPase, Na+/K+ transporting, alpha 2 (+) polypeptide (ATP1A2), mRNA.
ILMN_1689098	ATP1A3	0.0248494	0.0963855	0.0268683	NA	96.3414	1.83037	83.7922	NA	1.14977	NA	0.201339	2	2	2	2	2	2	0.184966	0.473787	Homo sapiens ATPase, Na+/K+ transporting, alpha 3 polypeptide (ATP1A3), mRNA.
ILMN_1705208	ATP1A4	0.54744	0.353916	0.0641343	NA	69.0054	3.12938	73.579	NA	0.937841	NA	-0.0925846	2	2	2	2	2	2	0.532819	0.687707	Homo sapiens ATPase, Na+/K+ transporting, alpha 4 polypeptide (ATP1A4), transcript variant 2, mRNA.
ILMN_1696132	ATP1A4	0.789157	0.930723	0.0353391	NA	64.6286	1.61497	60.6652	NA	1.06533	NA	0.0913041	2	2	2	2	2	2	0.542423	0.691735	Homo sapiens ATPase, Na+/K+ transporting, alpha 4 polypeptide (ATP1A4), transcript variant 1, mRNA.
ILMN_1730291	ATP1B1	0	0	0.0844539	NA	282.214	16.8533	266.564	NA	1.05871	NA	0.0823103	2	2	2	2	2	2	0.600603	0.710478	Homo sapiens ATPase, Na+/K+ transporting, beta 1 polypeptide (ATP1B1), transcript variant 1, mRNA.
ILMN_1658071	ATP1B1	0	0	0.0773866	NA	393.494	21.5322	313.041	NA	1.257	NA	0.329988	2	2	2	2	2	2	0.0405647	0.21989	Homo sapiens ATPase, Na+/K+ transporting, beta 1 polypeptide (ATP1B1), transcript variant 1, mRNA.
ILMN_2407824	ATP1B1	0	0	0.052325	NA	777.629	28.7718	480.07	NA	1.61983	NA	0.695838	2	2	2	2	2	2	0.000151864	0.00564607	Homo sapiens ATPase, Na+/K+ transporting, beta 1 polypeptide (ATP1B1), transcript variant 2, mRNA.
ILMN_1747271	ATP1B2	0	0	0.0506429	NA	245.008	8.77374	201.721	NA	1.21459	NA	0.280469	2	2	2	2	2	2	0.072914	0.300445	Homo sapiens ATPase, Na+/K+ transporting, beta 2 polypeptide (ATP1B2), mRNA.
ILMN_1783304	ATP1B3	0	0	0.0267218	NA	913.624	17.2631	1157.39	NA	0.789383	NA	-0.341203	2	2	2	2	2	2	0.0306405	0.185987	PREDICTED: Homo sapiens ATPase, Na+/K+ transporting, beta 3 polypeptide, transcript variant 2 (ATP1B3), mRNA.
ILMN_1759628	ATP1B3	0	0	0.164513	NA	555.334	64.6012	681.904	NA	0.814387	NA	-0.296213	2	2	2	2	2	2	0.0718292	0.298102	PREDICTED: Homo sapiens ATPase, Na+/K+ transporting, beta 3 polypeptide, transcript variant 2 (ATP1B3), mRNA.
ILMN_1654322	ATP1B3	0	0	0.00828833	NA	779.721	4.56974	857.408	NA	0.909394	NA	-0.137023	2	2	2	2	2	2	0.359037	0.610268	Homo sapiens ATPase, Na+/K+ transporting, beta 3 polypeptide (ATP1B3), mRNA. XM_945518
ILMN_1653211	ATP1B4	0.211596	0.364458	0.0288288	NA	76.5429	1.56033	73.4478	NA	1.04214	NA	0.0595482	2	2	2	2	2	2	0.689869	0.736955	Homo sapiens ATPase, (Na+)/K+ transporting, beta 4 polypeptide (ATP1B4), mRNA.
ILMN_1709541	ATP2A1	0.542922	0.319277	0.0236355	NA	69.3952	1.15979	74.6982	NA	0.929008	NA	-0.106238	2	2	2	2	2	2	0.475098	0.664608	Homo sapiens ATPase, Ca++ transporting, cardiac muscle, fast twitch 1 (ATP2A1), transcript variant a, mRNA.
ILMN_1674460	ATP2A1	0.0594879	0.456325	0.0273687	NA	87.4481	1.69235	71.3399	NA	1.2258	NA	0.293719	2	2	2	2	2	2	0.0591992	0.269878	Homo sapiens ATPase, Ca++ transporting, cardiac muscle, fast twitch 1 (ATP2A1), transcript variant a, mRNA.
ILMN_1687375	ATP2A2	0	0	0.0172047	NA	736.834	8.96399	886.394	NA	0.831271	NA	-0.266608	2	2	2	2	2	2	0.0833925	0.324482	Homo sapiens ATPase, Ca++ transporting, cardiac muscle, slow twitch 2 (ATP2A2), transcript variant 2, mRNA.
ILMN_1655884	ATP2A2	0	0	0.0445331	NA	1765.1	55.5824	1329.93	NA	1.32721	NA	0.408401	2	2	2	2	2	2	0.0120784	0.105345	Homo sapiens ATPase, Ca++ transporting, cardiac muscle, slow twitch 2 (ATP2A2), transcript variant 1, mRNA.
ILMN_1815666	ATP2A2	0	0	0.0331034	NA	1647.14	38.5557	1097.61	NA	1.50066	NA	0.585601	2	2	2	2	2	2	0.000776112	0.0171762	Homo sapiens ATPase, Ca++ transporting, cardiac muscle, slow twitch 2 (ATP2A2), transcript variant 1, mRNA.
ILMN_1697827	ATP2A3	0.0956325	0.0677711	0.0530737	NA	83.5693	3.13625	86.5399	NA	0.965673	NA	-0.0503928	2	2	2	2	2	2	0.730997	0.746472	Homo sapiens ATPase, Ca++ transporting, ubiquitous (ATP2A3), transcript variant 2, mRNA.
ILMN_2310909	ATP2A3	0.299699	0.381024	0.0456208	NA	74.1494	2.39197	73.051	NA	1.01504	NA	0.0215314	2	2	2	2	2	2	0.889019	0.781537	Homo sapiens ATPase, Ca++ transporting, ubiquitous (ATP2A3), transcript variant 2, mRNA.
ILMN_2401933	ATP2B1	0.328313	0.108434	0.0976426	NA	74.5587	5.14782	82.8127	NA	0.90033	NA	-0.151475	2	2	2	2	2	2	0.318069	0.585973	Homo sapiens ATPase, Ca++ transporting, plasma membrane 1 (ATP2B1), transcript variant 1, mRNA.
ILMN_1750599	ATP2B1	0.449548	0.165663	0.0955597	NA	71.8339	4.85388	79.3064	NA	0.905777	NA	-0.142772	2	2	2	2	2	2	0.345093	0.602693	Homo sapiens ATPase, Ca++ transporting, plasma membrane 1 (ATP2B1), transcript variant 1, mRNA.
ILMN_1734788	ATP2B2	0.518072	0.436747	0.0244583	NA	69.486	1.20174	71.7406	NA	0.968573	NA	-0.0460673	2	2	2	2	2	2	0.754847	0.752707	Homo sapiens ATPase, Ca++ transporting, plasma membrane 2 (ATP2B2), transcript variant 1, mRNA.
ILMN_2381938	ATP2B2	0.918675	0.876506	0.0194839	NA	61.0339	0.840876	62.3256	NA	0.979276	NA	-0.0302125	2	2	2	2	2	2	0.837507	0.771315	Homo sapiens ATPase, Ca++ transporting, plasma membrane 2 (ATP2B2), transcript variant 2, mRNA.
ILMN_1802223	ATP2B2	0.291416	0.304217	0.0655284	NA	74.8464	3.46805	75.3927	NA	0.992754	NA	-0.0104914	2	2	2	2	2	2	0.936078	0.788854	Homo sapiens ATPase, Ca++ transporting, plasma membrane 2 (ATP2B2), transcript variant 1, mRNA.
ILMN_1693481	ATP2B3	0.311747	0.481928	0.0373399	NA	73.8177	1.94903	70.8209	NA	1.04231	NA	0.0597909	2	2	2	2	2	2	0.69031	0.737184	Homo sapiens ATPase, Ca++ transporting, plasma membrane 3 (ATP2B3), transcript variant 1, mRNA.
ILMN_2415073	ATP2B3	0.464608	0.799699	0.00617442	NA	70.5765	0.308135	64.1975	NA	1.09937	NA	0.136671	2	2	2	2	2	2	0.360322	0.611183	Homo sapiens ATPase, Ca++ transporting, plasma membrane 3 (ATP2B3), transcript variant 2, mRNA.
ILMN_1660741	ATP2B3	0.060241	0.376506	0.11072	NA	88.8976	6.95987	73.1658	NA	1.21501	NA	0.280974	2	2	2	2	2	2	0.0858031	0.329551	Homo sapiens ATPase, Ca++ transporting, plasma membrane 3 (ATP2B3), transcript variant 2, mRNA.
ILMN_1664772	ATP2B4	0.00527108	0.0060241	0.00880731	NA	114.463	0.712844	132.224	NA	0.865677	NA	-0.2081	2	2	2	2	2	2	0.169721	0.456581	Homo sapiens ATPase, Ca++ transporting, plasma membrane 4 (ATP2B4), transcript variant 1, mRNA.
ILMN_2367753	ATP2B4	0	0	0.0357675	NA	407.85	10.3151	211.98	NA	1.924	NA	0.944111	2	2	2	2	2	2	3.64504e-06	0.00039532	Homo sapiens ATPase, Ca++ transporting, plasma membrane 4 (ATP2B4), transcript variant 2, mRNA.
ILMN_1696568	ATP2C1	0.000753012	0	0.0127452	NA	156.528	1.41066	171.456	NA	0.912935	NA	-0.131416	2	2	2	2	2	2	0.378655	0.620885	Homo sapiens ATPase, Ca++ transporting, type 2C, member 1 (ATP2C1), transcript variant 1, mRNA.
ILMN_1758784	ATP2C1	0.0587349	0.0376506	0.066007	NA	87.9983	4.10723	92.7446	NA	0.948824	NA	-0.0757873	2	2	2	2	2	2	0.607726	0.713581	Homo sapiens ATPase, Ca++ transporting, type 2C, member 1 (ATP2C1), transcript variant 3, mRNA.
ILMN_2340565	ATP2C1	0	0	0.0564018	NA	400.709	15.9811	357.234	NA	1.1217	NA	0.165687	2	2	2	2	2	2	0.278731	0.557404	Homo sapiens ATPase, Ca++ transporting, type 2C, member 1 (ATP2C1), transcript variant 4, mRNA.
ILMN_1785413	ATP2C2	0.637801	0.525602	0.0178005	NA	67.6622	0.851652	70.1191	NA	0.964961	NA	-0.0514571	2	2	2	2	2	2	0.727689	0.745654	Homo sapiens ATPase, Ca++ transporting, type 2C, member 2 (ATP2C2), mRNA.
ILMN_2209417	ATP4A	0.322289	0.174699	0.16127	NA	77.6326	8.85286	78.8876	NA	0.984091	NA	-0.0231356	2	2	2	2	2	2	0.840759	0.772167	Homo sapiens ATPase, H+/K+ exchanging, alpha polypeptide (ATP4A), mRNA.
ILMN_1703787	ATP4B	0.739458	0.638554	0.0812371	NA	65.095	3.73928	67.8853	NA	0.958897	NA	-0.0605519	2	2	2	2	2	2	0.67841	0.734173	Homo sapiens ATPase, H+/K+ exchanging, beta polypeptide (ATP4B), mRNA.
ILMN_1796405	ATP4B	0.149849	0.387048	0.023226	NA	79.0887	1.2989	72.8843	NA	1.08513	NA	0.117863	2	2	2	2	2	2	0.430449	0.645813	PREDICTED: Homo sapiens ATPase, H+/K+ exchanging, beta polypeptide (ATP4B), mRNA.
ILMN_1764494	ATP5A1	0	0	0.0183427	NA	14663.5	190.189	13583.8	NA	1.07948	NA	0.110342	2	2	2	2	2	2	0.459395	0.657818	Homo sapiens ATP synthase, H+ transporting, mitochondrial F1 complex, alpha subunit 1, cardiac muscle (ATP5A1), nuclear gene encoding mitochondrial protein, transcript variant 2, mRNA.
ILMN_2341363	ATP5A1	0	0	0.041264	NA	17123.1	499.62	15405.6	NA	1.11148	NA	0.152488	2	2	2	2	2	2	0.31363	0.582707	Homo sapiens ATP synthase, H+ transporting, mitochondrial F1 complex, alpha subunit 1, cardiac muscle (ATP5A1), nuclear gene encoding mitochondrial protein, transcript variant 2, mRNA.
ILMN_1772132	ATP5B	0	0	0.0397938	NA	26917.9	757.428	29519.3	NA	0.911874	NA	-0.133093	2	2	2	2	2	2	0.373503	0.618156	Homo sapiens ATP synthase, H+ transporting, mitochondrial F1 complex, beta polypeptide (ATP5B), nuclear gene encoding mitochondrial protein, mRNA.
ILMN_1701269	ATP5C1	0	0	0.00729898	NA	1184.9	6.11547	1037.73	NA	1.14182	NA	0.191335	2	2	2	2	2	2	0.205098	0.494341	Homo sapiens ATP synthase, H+ transporting, mitochondrial F1 complex, gamma polypeptide 1 (ATP5C1), nuclear gene encoding mitochondrial protein, transcript variant 2, mRNA.
ILMN_1679178	ATP5D	0	0	0.0814371	NA	533.313	30.7107	566.785	NA	0.940944	NA	-0.0878189	2	2	2	2	2	2	0.553291	0.69456	Homo sapiens ATP synthase, H+ transporting, mitochondrial F1 complex, delta subunit (ATP5D), nuclear gene encoding mitochondrial protein, transcript variant 1, mRNA.
ILMN_1653599	ATP5D	0	0	0.0889124	NA	4473.71	281.265	4302.8	NA	1.03972	NA	0.0561975	2	2	2	2	2	2	0.72637	0.745317	Homo sapiens ATP synthase, H+ transporting, mitochondrial F1 complex, delta subunit (ATP5D), nuclear gene encoding mitochondrial protein, transcript variant 1, mRNA.
ILMN_2225887	ATP5EP2	0	0	0.00184918	NA	8524.09	11.1458	8323.6	NA	1.02409	NA	0.0343375	2	2	2	2	2	2	0.816285	0.766751	Homo sapiens ATP synthase, H+ transporting, mitochondrial F1 complex, epsilon subunit pseudogene 2 (ATP5EP2), transcript variant 6, non-coding RNA.
ILMN_1672191	ATP5F1	0	0	0.0938307	NA	1082.39	71.8148	1461.38	NA	0.740661	NA	-0.433115	2	2	2	2	2	2	0.00929877	0.0907343	Homo sapiens ATP synthase, H+ transporting, mitochondrial F0 complex, subunit B1 (ATP5F1), nuclear gene encoding mitochondrial protein, mRNA.
ILMN_1721989	ATP5F1	0	0	0.026133	NA	6072.47	112.212	5663.5	NA	1.07221	NA	0.100588	2	2	2	2	2	2	0.500636	0.675582	Homo sapiens ATP synthase, H+ transporting, mitochondrial F0 complex, subunit B1 (ATP5F1), nuclear gene encoding mitochondrial protein, mRNA.
ILMN_1712430	ATP5G1	0	0	0.12648	NA	261.969	23.4292	384.378	NA	0.68154	NA	-0.553131	2	2	2	2	2	2	0.00185504	0.0309899	Homo sapiens ATP synthase, H+ transporting, mitochondrial F0 complex, subunit C1 (subunit 9) (ATP5G1), nuclear gene encoding mitochondrial protein, transcript variant 1, mRNA.
ILMN_1676393	ATP5G1	0	0	0.0593474	NA	4010.16	168.286	3671.38	NA	1.09227	NA	0.127335	2	2	2	2	2	2	0.404155	0.633831	Homo sapiens ATP synthase, H+ transporting, mitochondrial F0 complex, subunit C1 (subunit 9) (ATP5G1), nuclear gene encoding mitochondrial protein, transcript variant 2, mRNA.
ILMN_1669102	ATP5G2	0	0	0.0711268	NA	175.871	8.84529	202.845	NA	0.867019	NA	-0.205865	2	2	2	2	2	2	0.178375	0.466774	Homo sapiens ATP synthase, H+ transporting, mitochondrial F0 complex, subunit C2 (subunit 9) (ATP5G2), nuclear gene encoding mitochondrial protein, transcript variant 2, mRNA.
ILMN_1660577	ATP5G2	0	0	0.125188	NA	6213.53	550.03	6449.42	NA	0.963425	NA	-0.0537554	2	2	2	2	2	2	0.704628	0.741133	Homo sapiens ATP synthase, H+ transporting, mitochondrial F0 complex, subunit c (subunit 9), isoform 2 (ATP5G2), nuclear gene encoding mitochondrial protein, transcript variant 2, mRNA.
ILMN_1807798	ATP5G2	0.000753012	0.0060241	0.000651575	NA	158.573	0.0730596	133.821	NA	1.18496	NA	0.244838	2	2	2	2	2	2	0.109429	0.371982	Homo sapiens ATP synthase, H+ transporting, mitochondrial F0 complex, subunit C2 (subunit 9) (ATP5G2), nuclear gene encoding mitochondrial protein, transcript variant 1, mRNA.
ILMN_1770466	ATP5G3	0	0	0.0246453	NA	363.707	6.33827	514.126	NA	0.707428	NA	-0.499345	2	2	2	2	2	2	0.00289127	0.0419742	Homo sapiens ATP synthase, H+ transporting, mitochondrial F0 complex, subunit C3 (subunit 9) (ATP5G3), nuclear gene encoding mitochondrial protein, transcript variant 3, mRNA.
ILMN_1794912	ATP5H	0	0	0.0241792	NA	4215.53	72.0741	5250.75	NA	0.802843	NA	-0.316811	2	2	2	2	2	2	0.0429405	0.227573	Homo sapiens ATP synthase, H+ transporting, mitochondrial F0 complex, subunit d (ATP5H), nuclear gene encoding mitochondrial protein, transcript variant 2, mRNA.
ILMN_1666372	ATP5H	0	0	0.0187088	NA	6854.24	90.6757	7293.8	NA	0.939734	NA	-0.0896752	2	2	2	2	2	2	0.545681	0.692772	Homo sapiens ATP synthase, H+ transporting, mitochondrial F0 complex, subunit d (ATP5H), nuclear gene encoding mitochondrial protein, transcript variant 1, mRNA.
ILMN_1772506	ATP5I	0	0	0.0845371	NA	558.722	33.3986	645.712	NA	0.86528	NA	-0.208762	2	2	2	2	2	2	0.174401	0.463123	Homo sapiens ATP synthase, H+ transporting, mitochondrial F0 complex, subunit E (ATP5I), nuclear gene encoding mitochondrial protein, mRNA.
ILMN_1726603	ATP5I	0	0	0.0182033	NA	7058.08	90.8494	7813.4	NA	0.90333	NA	-0.146674	2	2	2	2	2	2	0.327166	0.592734	Homo sapiens ATP synthase, H+ transporting, mitochondrial F0 complex, subunit E (ATP5I), nuclear gene encoding mitochondrial protein, mRNA.
ILMN_1652806	ATP5J	0	0	0.128618	NA	1053.08	95.7737	1070.14	NA	0.984061	NA	-0.0231811	2	2	2	2	2	2	0.852611	0.773944	Homo sapiens ATP synthase, H+ transporting, mitochondrial F0 complex, subunit F6 (ATP5J), nuclear gene encoding mitochondrial protein, transcript variant 1, mRNA.
ILMN_2348093	ATP5J	0	0	0.0319804	NA	10775	243.66	9905.08	NA	1.08782	NA	0.121442	2	2	2	2	2	2	0.418314	0.640167	Homo sapiens ATP synthase, H+ transporting, mitochondrial F0 complex, subunit F6 (ATP5J), nuclear gene encoding mitochondrial protein, transcript variant 3, mRNA.
ILMN_1772929	ATP5J	0	0	0.0394728	NA	10109.1	282.161	9275.71	NA	1.08985	NA	0.124131	2	2	2	2	2	2	0.409904	0.636445	Homo sapiens ATP synthase, H+ transporting, mitochondrial F0 complex, subunit F6 (ATP5J), nuclear gene encoding mitochondrial protein, transcript variant 5, mRNA.
ILMN_2310621	ATP5J2	0	0	0.0716723	NA	2718.45	137.771	3401.85	NA	0.799111	NA	-0.323532	2	2	2	2	2	2	0.041338	0.222303	Homo sapiens ATP synthase, H+ transporting, mitochondrial F0 complex, subunit F2 (ATP5J2), nuclear gene encoding mitochondrial protein, transcript variant 1, mRNA.
ILMN_2307883	ATP5J2	0	0	0.00719683	NA	2031.53	10.3383	2505.87	NA	0.810707	NA	-0.302747	2	2	2	2	2	2	0.0516872	0.25142	Homo sapiens ATP synthase, H+ transporting, mitochondrial F0 complex, subunit F2 (ATP5J2), nuclear gene encoding mitochondrial protein, transcript variant 3, mRNA.
ILMN_2079285	ATP5L	0	0	0.0634656	NA	372.237	16.7049	531.505	NA	0.700345	NA	-0.513862	2	2	2	2	2	2	0.00251327	0.0381986	Homo sapiens ATP synthase, H+ transporting, mitochondrial F0 complex, subunit G (ATP5L), nuclear gene encoding mitochondrial protein, mRNA.
ILMN_1791332	ATP5O	0	0	0.00374455	NA	6985.73	18.4968	6361.05	NA	1.0982	NA	0.135145	2	2	2	2	2	2	0.365516	0.613734	Homo sapiens ATP synthase, H+ transporting, mitochondrial F1 complex, O subunit (ATP5O), nuclear gene encoding mitochondrial protein, mRNA.
ILMN_1700625	ATP5S	0.160392	0.106928	0.110551	NA	81.0991	6.33963	82.9888	NA	0.97723	NA	-0.0332307	2	2	2	2	2	2	0.807698	0.764147	Homo sapiens ATP synthase, H+ transporting, mitochondrial F0 complex, subunit s (factor B) (ATP5S), nuclear gene encoding mitochondrial protein, transcript variant 1, mRNA.
ILMN_2299843	ATP5S	0.00301205	0.0060241	0.31818	NA	144.028	32.4046	120.59	NA	1.19437	NA	0.256247	2	2	2	2	2	2	0.279153	0.557677	Homo sapiens ATP synthase, H+ transporting, mitochondrial F0 complex, subunit s (factor B) (ATP5S), nuclear gene encoding mitochondrial protein, transcript variant 3, mRNA.
ILMN_1809027	ATP5SL	0	0	0.00439046	NA	1491.56	4.63058	1757.39	NA	0.848735	NA	-0.236614	2	2	2	2	2	2	0.121062	0.391447	Homo sapiens ATP5S-like (ATP5SL), mRNA.
ILMN_1697694	ATP6AP1	0	0	0.086729	NA	1926.75	118.161	1874.83	NA	1.02769	NA	0.0394107	2	2	2	2	2	2	0.809335	0.76464	Homo sapiens ATPase, H+ transporting, lysosomal accessory protein 1 (ATP6AP1), mRNA.
ILMN_1755990	ATP6AP1L	0.00150602	0	0.299513	NA	170.204	36.0472	194.538	NA	0.874916	NA	-0.192784	2	2	2	2	2	2	0.251854	0.536569	Homo sapiens ATPase, H+ transporting, lysosomal accessory protein 1-like (ATP6AP1L), mRNA.
ILMN_1677440	ATP6AP2	0	0	0.228347	NA	869.733	140.432	1015.06	NA	0.856826	NA	-0.222925	2	2	2	2	2	2	0.178633	0.467237	Homo sapiens ATPase, H+ transporting, lysosomal accessory protein 2 (ATP6AP2), mRNA.
ILMN_1752579	ATP6V0A1	0	0	0.0593608	NA	817.338	34.3073	1089.62	NA	0.750114	NA	-0.414818	2	2	2	2	2	2	0.0110574	0.100769	Homo sapiens ATPase, H+ transporting, lysosomal V0 subunit a1 (ATP6V0A1), transcript variant 3, mRNA.
ILMN_1700380	ATP6V0A2	0	0.00150602	0.00675828	NA	323.02	1.54366	166.574	NA	1.9392	NA	0.955461	2	2	2	2	2	2	2.89853e-06	0.000330807	Homo sapiens ATPase, H+ transporting, lysosomal V0 subunit a2 (ATP6V0A2), mRNA.
ILMN_1721788	ATP6V0A4	0.153614	0.231928	0.010122	NA	79.0354	0.565684	76.9981	NA	1.02646	NA	0.0376764	2	2	2	2	2	2	0.799078	0.762227	Homo sapiens ATPase, H+ transporting, lysosomal V0 subunit a isoform 4 (ATP6V0A4), transcript variant 3, mRNA.
ILMN_2394287	ATP6V0A4	0.531627	0.769578	0.0744705	NA	69.4138	3.65523	64.923	NA	1.06917	NA	0.0964925	2	2	2	2	2	2	0.533197	0.687707	Homo sapiens ATPase, H+ transporting, lysosomal V0 subunit a4 (ATP6V0A4), transcript variant 2, mRNA.
ILMN_1812896	ATP6V0A4	0.500753	0.781627	0.0350768	NA	69.8312	1.73202	64.5456	NA	1.08189	NA	0.113553	2	2	2	2	2	2	0.449432	0.653097	Homo sapiens ATPase, H+ transporting, lysosomal V0 subunit a4 (ATP6V0A4), transcript variant 1, mRNA.
ILMN_1678186	ATP6V0A4	0.518072	0.953313	0.164358	NA	70.5187	8.19559	58.8856	NA	1.19755	NA	0.260091	2	2	2	2	2	2	0.13538	0.411355	Homo sapiens ATPase, H+ transporting, lysosomal V0 subunit a4 (ATP6V0A4), transcript variant 1, mRNA.
ILMN_1721391	ATP6V0B	0	0	0.0511229	NA	4318.28	156.103	5053.02	NA	0.854593	NA	-0.22669	2	2	2	2	2	2	0.138632	0.41561	Homo sapiens ATPase, H+ transporting, lysosomal 21kDa, V0 subunit b (ATP6V0B), transcript variant 1, mRNA.
ILMN_2353642	ATP6V0B	0.000753012	0.00150602	0.122474	NA	155.092	13.4314	166.812	NA	0.929744	NA	-0.105095	2	2	2	2	2	2	0.481864	0.668041	Homo sapiens ATPase, H+ transporting, lysosomal 21kDa, V0 subunit b (ATP6V0B), transcript variant 2, mRNA.
ILMN_1773849	ATP6V0C	0	0	0.0800483	NA	626.144	35.4414	766.945	NA	0.816413	NA	-0.292629	2	2	2	2	2	2	0.0630599	0.279053	PREDICTED: Homo sapiens ATPase, H+ transporting, lysosomal 16kDa, V0 subunit c (ATP6V0C), mRNA.
ILMN_1795826	ATP6V0D1	0	0	0.0752635	NA	970.195	51.6332	1243.4	NA	0.780277	NA	-0.357942	2	2	2	2	2	2	0.0259188	0.168586	Homo sapiens ATPase, H+ transporting, lysosomal 38kDa, V0 subunit d1 (ATP6V0D1), mRNA.
ILMN_1799889	ATP6V0D2	0.106928	0.305723	0.0134879	NA	81.7162	0.779358	75.1953	NA	1.08672	NA	0.119979	2	2	2	2	2	2	0.421223	0.641383	Homo sapiens ATPase, H+ transporting, lysosomal 38kDa, V0 subunit d2 (ATP6V0D2), mRNA.
ILMN_2071937	ATP6V0E1	0	0	0.00776641	NA	2876.33	15.7959	3031.87	NA	0.948698	NA	-0.0759794	2	2	2	2	2	2	0.60818	0.713707	Homo sapiens ATPase, H+ transporting, lysosomal 9kDa, V0 subunit e1 (ATP6V0E1), mRNA.
ILMN_1785095	ATP6V0E2	0	0	0.113578	NA	1463.5	117.536	1598.82	NA	0.915363	NA	-0.127584	2	2	2	2	2	2	0.39794	0.631414	Homo sapiens ATPase, H+ transporting V0 subunit e2 (ATP6V0E2), transcript variant 1, mRNA.
ILMN_1711516	ATP6V1A	0	0	0.0933837	NA	1255.27	82.8886	1966.74	NA	0.63825	NA	-0.647806	2	2	2	2	2	2	0.000371599	0.0102758	Homo sapiens ATPase, H+ transporting, lysosomal 70kDa, V1 subunit A (ATP6V1A), mRNA.
ILMN_1812073	ATP6V1B1	0.474398	0.48494	0.0799932	NA	70.7857	4.00391	70.7571	NA	1.00041	NA	0.000584677	2	2	2	2	2	2	0.990894	0.799885	Homo sapiens ATPase, H+ transporting, lysosomal 56/58kDa, V1 subunit B1 (ATP6V1B1), mRNA.
ILMN_1787705	ATP6V1B2	0	0	0.03933	NA	2428.04	67.5251	1952.19	NA	1.24375	NA	0.314699	2	2	2	2	2	2	0.0453844	0.233913	Homo sapiens ATPase, H+ transporting, lysosomal 56/58kDa, V1 subunit B2 (ATP6V1B2), mRNA.
ILMN_1659801	ATP6V1C1	0	0.00301205	0.0407759	NA	166.717	4.80695	151.807	NA	1.09822	NA	0.135166	2	2	2	2	2	2	0.370497	0.616403	Homo sapiens ATPase, H+ transporting, lysosomal 42kDa, V1 subunit C1 (ATP6V1C1), mRNA.
ILMN_1663257	ATP6V1C1	0.389307	0.736446	0.203408	NA	77.0866	11.0875	65.8486	NA	1.17066	NA	0.227328	2	2	2	2	2	2	0.221406	0.508322	Homo sapiens ATPase, H+ transporting, lysosomal 42kDa, V1 subunit C1 (ATP6V1C1), mRNA.
ILMN_2389995	ATP6V1C2	0.791416	0.656627	0.0685974	NA	64.2164	3.11486	67.5902	NA	0.950084	NA	-0.0738735	2	2	2	2	2	2	0.61645	0.71598	Homo sapiens ATPase, H+ transporting, lysosomal 42kDa, V1 subunit C2 (ATP6V1C2), transcript variant 2, mRNA.
ILMN_1660729	ATP6V1C2	0.406627	0.447289	0.0238561	NA	71.6507	1.20866	71.5002	NA	1.00211	NA	0.0030338	2	2	2	2	2	2	0.984753	0.79901	Homo sapiens ATPase, H+ transporting, lysosomal 42kDa, V1 subunit C2 (ATP6V1C2), transcript variant 2, mRNA.
ILMN_1797310	ATP6V1D	0	0	0.0395478	NA	1912.01	53.4684	2350.11	NA	0.813582	NA	-0.29764	2	2	2	2	2	2	0.0562605	0.262706	Homo sapiens ATPase, H+ transporting, lysosomal 34kDa, V1 subunit D (ATP6V1D), mRNA.
ILMN_1798485	ATP6V1E1	0	0	0.0716717	NA	2093.82	106.114	2249.1	NA	0.930956	NA	-0.103214	2	2	2	2	2	2	0.488246	0.671034	Homo sapiens ATPase, H+ transporting, lysosomal 31kDa, V1 subunit E1 (ATP6V1E1), transcript variant 3, mRNA.
ILMN_2339779	ATP6V1E1	0	0	0.0502525	NA	2762.38	98.1581	2858.53	NA	0.966363	NA	-0.0493636	2	2	2	2	2	2	0.736411	0.747816	Homo sapiens ATPase, H+ transporting, lysosomal 31kDa, V1 subunit E1 (ATP6V1E1), transcript variant 3, mRNA.
ILMN_1810235	ATP6V1E2	0	0.0060241	0.0969228	NA	175.913	12.0561	130.373	NA	1.3493	NA	0.432214	2	2	2	2	2	2	0.0105056	0.0972438	Homo sapiens ATPase, H+ transporting, lysosomal 31kDa, V1 subunit E2 (ATP6V1E2), mRNA.
ILMN_2099783	ATP6V1F	0	0	0.0370053	NA	2093.66	54.7841	2142.13	NA	0.977372	NA	-0.0330196	2	2	2	2	2	2	0.821533	0.767688	Homo sapiens ATPase, H+ transporting, lysosomal 14kDa, V1 subunit F (ATP6V1F), mRNA.
ILMN_1784523	ATP6V1G1	0	0	0.164203	NA	2170.62	252.028	2524.71	NA	0.859749	NA	-0.218012	2	2	2	2	2	2	0.171892	0.459536	Homo sapiens ATPase, H+ transporting, lysosomal 13kDa, V1 subunit G1 (ATP6V1G1), mRNA.
ILMN_1654541	ATP6V1G2	0	0	0.0721006	NA	181.303	9.24336	207.762	NA	0.87265	NA	-0.196525	2	2	2	2	2	2	0.19788	0.487655	Homo sapiens ATPase, H+ transporting, lysosomal 13kDa, V1 subunit G2 (ATP6V1G2), transcript variant 1, mRNA.
ILMN_1674778	ATP6V1G2	0.164157	0.231928	0.0949761	NA	80.2719	5.39092	77.0219	NA	1.0422	NA	0.0596273	2	2	2	2	2	2	0.712698	0.742612	Homo sapiens ATPase, H+ transporting, lysosomal 13kDa, V1 subunit G2 (ATP6V1G2), transcript variant 1, mRNA.
ILMN_2371001	ATP6V1G3	0.110693	0.72741	0.0362533	NA	82.0263	2.10274	66.2668	NA	1.23782	NA	0.3078	2	2	2	2	2	2	0.0495877	0.24631	Homo sapiens ATPase, H+ transporting, lysosomal 13kDa, V1 subunit G3 (ATP6V1G3), transcript variant 1, mRNA.
ILMN_2403730	ATP6V1H	0	0	0.00837098	NA	484.912	2.87028	753.28	NA	0.643733	NA	-0.635465	2	2	2	2	2	2	0.000341463	0.00972221	Homo sapiens ATPase, H+ transporting, lysosomal 50/57kDa, V1 subunit H (ATP6V1H), transcript variant 2, mRNA.
ILMN_1689473	ATP6V1H	0.00150602	0	0.017711	NA	139.757	1.75026	173.52	NA	0.805423	NA	-0.312182	2	2	2	2	2	2	0.0456035	0.234484	Homo sapiens ATPase, H+ transporting, lysosomal 50/57kDa, V1 subunit H (ATP6V1H), transcript variant 3, mRNA.
ILMN_1808115	ATP7A	0.0338855	0.564759	0.0334518	NA	92.3567	2.1846	69.3008	NA	1.33269	NA	0.414343	2	2	2	2	2	2	0.0107874	0.0989526	Homo sapiens ATPase, Cu++ transporting, alpha polypeptide (Menkes syndrome) (ATP7A), mRNA.
ILMN_1696223	ATP7B	0.0888554	0.0963855	0.0279006	NA	83.776	1.65279	83.6683	NA	1.00129	NA	0.00185535	2	2	2	2	2	2	0.991519	0.799887	Homo sapiens ATPase, Cu++ transporting, beta polypeptide (ATP7B), transcript variant 1, mRNA.
ILMN_1722056	ATP7B	0.000753012	0.0060241	0.0792333	NA	143.888	8.06154	123.994	NA	1.16044	NA	0.214674	2	2	2	2	2	2	0.171035	0.458514	Homo sapiens ATPase, Cu++ transporting, beta polypeptide (ATP7B), transcript variant 1, mRNA.
ILMN_1778358	ATP8A1	0.368223	0.152108	0.0962198	NA	73.9213	5.02943	80.0951	NA	0.922919	NA	-0.115724	2	2	2	2	2	2	0.439902	0.648842	Homo sapiens ATPase, aminophospholipid transporter (APLT), Class I, type 8A, member 1 (ATP8A1), mRNA.
ILMN_1693896	ATP8A2	0.0376506	0.106928	0.122072	NA	94.6665	8.17145	83.0876	NA	1.13936	NA	0.188219	2	2	2	2	2	2	0.249861	0.534292	Homo sapiens ATPase, aminophospholipid transporter-like, class I, type 8A, member 2 (ATP8A2), mRNA.
ILMN_1710523	ATP8B1	0.349398	0.378012	0.0541371	NA	73.2503	2.80407	73.1243	NA	1.00172	NA	0.00248316	2	2	2	2	2	2	0.992386	0.800001	Homo sapiens ATPase, class I, type 8B, member 1 (ATP8B1), mRNA.
ILMN_1782057	ATP8B2	0	0	0.0349934	NA	218.601	5.40908	297.825	NA	0.733994	NA	-0.44616	2	2	2	2	2	2	0.00662083	0.0723198	Homo sapiens ATPase, class I, type 8B, member 2 (ATP8B2), transcript variant 1, mRNA.
ILMN_2301193	ATP8B2	0.00527108	0.0436747	0.043169	NA	110.462	3.37186	91.4165	NA	1.20833	NA	0.27302	2	2	2	2	2	2	0.0792244	0.314929	Homo sapiens ATPase, class I, type 8B, member 2 (ATP8B2), transcript variant 2, mRNA.
ILMN_1653372	ATP8B3	0.271084	0.391566	0.0343447	NA	74.8502	1.81777	72.6703	NA	1.03	NA	0.0426405	2	2	2	2	2	2	0.776231	0.756787	Homo sapiens ATPase, class I, type 8B, member 3 (ATP8B3), mRNA.
ILMN_1783956	ATP8B4	0.0512048	0.0436747	0.149513	NA	92.5202	9.7814	90.8724	NA	1.01813	NA	0.0259256	2	2	2	2	2	2	0.911399	0.785176	Homo sapiens ATPase, class I, type 8B, member 4 (ATP8B4), mRNA.
ILMN_1706406	ATP9A	0.324548	0.198795	0.0513209	NA	73.6825	2.67389	77.9764	NA	0.944933	NA	-0.0817162	2	2	2	2	2	2	0.581069	0.70428	Homo sapiens ATPase, class II, type 9A (ATP9A), mRNA.
ILMN_2089073	ATP9A	0	0	0.0615557	NA	390.175	16.9829	330.601	NA	1.1802	NA	0.23903	2	2	2	2	2	2	0.124601	0.396641	Homo sapiens ATPase, class II, type 9A (ATP9A), mRNA.
ILMN_1658684	ATP9B	0.0700301	0.0165663	0.0405382	NA	86.444	2.4779	100.611	NA	0.859189	NA	-0.218953	2	2	2	2	2	2	0.15095	0.433355	Homo sapiens ATPase, class II, type 9B (ATP9B), mRNA.
ILMN_1790603	ATPAF1	0	0	0.0247054	NA	1155.14	20.1795	1108.22	NA	1.04234	NA	0.0598223	2	2	2	2	2	2	0.687871	0.736857	Homo sapiens ATP synthase mitochondrial F1 complex assembly factor 1 (ATPAF1), nuclear gene encoding mitochondrial protein, transcript variant 1, mRNA.
ILMN_2395055	ATPAF1	0	0	0.00140512	NA	998.396	0.991978	835.265	NA	1.1953	NA	0.257378	2	2	2	2	2	2	0.0935555	0.343953	Homo sapiens ATP synthase mitochondrial F1 complex assembly factor 1 (ATPAF1), nuclear gene encoding mitochondrial protein, transcript variant 2, mRNA.
ILMN_1727390	ATPAF2	0	0	0.0693322	NA	209.456	10.2687	271.991	NA	0.770087	NA	-0.376906	2	2	2	2	2	2	0.0195827	0.14264	Homo sapiens ATP synthase mitochondrial F1 complex assembly factor 2 (ATPAF2), nuclear gene encoding mitochondrial protein, mRNA.
ILMN_1682375	ATPBD3	0.00527108	0.00301205	0.0203511	NA	116.19	1.67202	153.168	NA	0.758574	NA	-0.398637	2	2	2	2	2	2	0.0132892	0.112087	Homo sapiens ATP binding domain 3 (ATPBD3), mRNA.
ILMN_2140207	ATPBD4	0.00225904	0.0060241	0.0705671	NA	132.112	6.59217	129.373	NA	1.02117	NA	0.0302198	2	2	2	2	2	2	0.850305	0.773678	Homo sapiens ATP binding domain 4 (ATPBD4), mRNA.
ILMN_1685978	ATPIF1	0	0	0.044078	NA	207.884	6.47931	234.483	NA	0.886566	NA	-0.173701	2	2	2	2	2	2	0.24967	0.534292	Homo sapiens ATPase inhibitory factor 1 (ATPIF1), nuclear gene encoding mitochondrial protein, transcript variant 3, mRNA.
ILMN_1727332	ATPIF1	0	0	0.0801939	NA	1173.73	66.5572	1230	NA	0.954252	NA	-0.0675571	2	2	2	2	2	2	0.645213	0.724704	Homo sapiens ATPase inhibitory factor 1 (ATPIF1), nuclear gene encoding mitochondrial protein, transcript variant 3, mRNA.
ILMN_1810385	ATR	0.768825	0.468373	0.0331892	NA	65.0453	1.5265	71.1809	NA	0.913803	NA	-0.130045	2	2	2	2	2	2	0.384027	0.623071	PREDICTED: Homo sapiens ataxia telangiectasia and Rad3 related (ATR), mRNA.
ILMN_2277201	ATR	0.94503	0.918675	0.0249562	NA	59.5927	1.05161	60.9498	NA	0.977735	NA	-0.0324846	2	2	2	2	2	2	0.825247	0.76871	Homo sapiens ataxia telangiectasia and Rad3 related (ATR), mRNA.
ILMN_2376771	ATR	0.238705	0.34488	0.110626	NA	77.9649	6.09876	73.9436	NA	1.05438	NA	0.0763983	2	2	2	2	2	2	0.64248	0.723582	Homo sapiens ataxia telangiectasia and Rad3 related (ATR), mRNA.
ILMN_1653896	ATRIP	0	0	0.0789008	NA	251.536	14.0335	328.83	NA	0.76494	NA	-0.386581	2	2	2	2	2	2	0.017431	0.132935	Homo sapiens ATR interacting protein (ATRIP), transcript variant 2, mRNA.
ILMN_2370464	ATRIP	0	0	0.172971	NA	312.428	38.2128	344.322	NA	0.907373	NA	-0.140232	2	2	2	2	2	2	0.362623	0.612214	Homo sapiens ATR interacting protein (ATRIP), transcript variant 2, mRNA.
ILMN_2297205	ATRN	0.58509	0.0798193	0.0229964	NA	68.5115	1.11406	85.1429	NA	0.804665	NA	-0.31354	2	2	2	2	2	2	0.0448776	0.232873	Homo sapiens attractin (ATRN), transcript variant 1, mRNA.
ILMN_2355586	ATRN	0.0459337	0.0271084	0.00261422	NA	90.062	0.166482	97.1875	NA	0.926683	NA	-0.109852	2	2	2	2	2	2	0.4603	0.658296	Homo sapiens attractin (ATRN), transcript variant 2, mRNA.
ILMN_1678541	ATRN	0.0798193	0.0707831	0.00535326	NA	84.8454	0.321168	85.9384	NA	0.987283	NA	-0.0184649	2	2	2	2	2	2	0.900476	0.783274	Homo sapiens attractin (ATRN), transcript variant 1, mRNA.
ILMN_1786966	ATRNL1	0.466867	0.346386	0.0425227	NA	70.6757	2.12508	73.8486	NA	0.957035	NA	-0.063357	2	2	2	2	2	2	0.667681	0.73203	Homo sapiens attractin-like 1 (ATRNL1), mRNA.
ILMN_1666885	ATRX	0.591867	0.185241	0.0364597	NA	68.4458	1.7646	78.43	NA	0.872699	NA	-0.196444	2	2	2	2	2	2	0.19479	0.484686	Homo sapiens alpha thalassemia/mental retardation syndrome X-linked (RAD54 homolog, S. cerevisiae) (ATRX), transcript variant 1, mRNA.
ILMN_1726576	ATRX	0.306476	0.39006	0.0960316	NA	75.3786	5.11856	72.7119	NA	1.03668	NA	0.0519646	2	2	2	2	2	2	0.750777	0.751852	Homo sapiens alpha thalassemia/mental retardation syndrome X-linked (RAD54 homolog, S. cerevisiae) (ATRX), transcript variant 3, mRNA.
ILMN_2334256	ATRX	0.804217	0.926205	0.0132035	NA	64.4012	0.60127	60.8192	NA	1.0589	NA	0.0825597	2	2	2	2	2	2	0.578282	0.702926	Homo sapiens alpha thalassemia/mental retardation syndrome X-linked (RAD54 homolog, S. cerevisiae) (ATRX), transcript variant 1, mRNA.
ILMN_2153332	ATXN1	0.265813	0.527108	0.0149913	NA	74.9174	0.794158	70.0074	NA	1.07014	NA	0.0977939	2	2	2	2	2	2	0.511051	0.679794	Homo sapiens ataxin 1 (ATXN1), mRNA.
ILMN_2169676	ATXN10	0.21762	0.286145	0.101929	NA	78.0274	5.6238	75.7617	NA	1.02991	NA	0.0425118	2	2	2	2	2	2	0.800911	0.762763	Homo sapiens ataxin 10 (ATXN10), mRNA.
ILMN_1743829	ATXN2	0	0	0.0590441	NA	1475.47	61.6018	1408.24	NA	1.04774	NA	0.0672862	2	2	2	2	2	2	0.659946	0.72936	Homo sapiens ataxin 2 (ATXN2), mRNA.
ILMN_2354334	ATXN2L	0.0625	0.310241	0.04782	NA	87.7215	2.9662	75.0435	NA	1.16894	NA	0.225204	2	2	2	2	2	2	0.143567	0.423543	Homo sapiens ataxin 2-like (ATXN2L), transcript variant F, mRNA. XM_944041 XM_944048 XM_944052
ILMN_2271627	ATXN2L	0.00150602	0.0060241	0.163196	NA	148.029	17.0821	114.05	NA	1.29793	NA	0.376214	2	2	2	2	2	2	0.0338856	0.198207	Homo sapiens ataxin 2-like (ATXN2L), transcript variant A, mRNA.
ILMN_1725696	ATXN3	0.0293675	0.0150602	0.03163	NA	94.0026	2.10245	105.682	NA	0.889489	NA	-0.168951	2	2	2	2	2	2	0.261602	0.543675	Homo sapiens ataxin 3 (ATXN3), transcript variant 1, mRNA.
ILMN_2393497	ATXN3	0	0	0.132844	NA	466.745	43.8436	470.261	NA	0.992523	NA	-0.0108277	2	2	2	2	2	2	0.912974	0.785378	Homo sapiens ataxin 3 (ATXN3), transcript variant 2, mRNA.
ILMN_1688602	ATXN7	0.22741	0.736446	0.0761735	NA	76.903	4.14221	65.866	NA	1.16757	NA	0.223505	2	2	2	2	2	2	0.153785	0.436742	Homo sapiens ataxin 7 (ATXN7), mRNA.
ILMN_1777260	ATXN7L1	0.623494	0.528614	0.0214603	NA	67.9164	1.03062	69.8923	NA	0.971729	NA	-0.0413742	2	2	2	2	2	2	0.779111	0.75737	Homo sapiens ataxin 7-like 1 (ATXN7L1), mRNA.
ILMN_1664177	ATXN7L2	0.000753012	0	0.117442	NA	166.838	13.8549	167.685	NA	0.994951	NA	-0.00730211	2	2	2	2	2	2	0.936964	0.789168	Homo sapiens ataxin 7-like 2 (ATXN7L2), mRNA.
ILMN_2111556	ATXN8OS	0.869729	0.759036	0.0222065	NA	62.8338	0.986639	65.1629	NA	0.964258	NA	-0.0525095	2	2	2	2	2	2	0.722239	0.744509	Homo sapiens ataxin 8 opposite strand (ATXN8OS) on chromosome 13.
ILMN_2231911	AUH	0	0	0.0990012	NA	426.937	29.8875	372.228	NA	1.14698	NA	0.197837	2	2	2	2	2	2	0.214356	0.501951	Homo sapiens AU RNA binding protein/enoyl-Coenzyme A hydratase (AUH), nuclear gene encoding mitochondrial protein, mRNA.
ILMN_1651378	AUP1	0.000753012	0	0.163044	NA	152.961	17.6348	190.855	NA	0.801451	NA	-0.319313	2	2	2	2	2	2	0.054164	0.257371	Homo sapiens ancient ubiquitous protein 1 (AUP1), mRNA.
ILMN_1680955	AURKA	0	0	0.0107887	NA	2690.56	20.5257	2348.42	NA	1.14569	NA	0.196217	2	2	2	2	2	2	0.194412	0.484173	Homo sapiens aurora kinase A (AURKA), transcript variant 5, mRNA.
ILMN_2357438	AURKA	0	0	0.000832117	NA	2335.86	1.37441	1975.68	NA	1.18231	NA	0.241605	2	2	2	2	2	2	0.113879	0.379913	Homo sapiens aurora kinase A (AURKA), transcript variant 3, mRNA.
ILMN_1768396	AURKAIP1	0	0	0.00412615	NA	2855.95	8.3326	4255.07	NA	0.671187	NA	-0.575213	2	2	2	2	2	2	0.00087329	0.0186133	Homo sapiens aurora kinase A interacting protein 1 (AURKAIP1), mRNA.
ILMN_2053650	AURKAPS1	0.00978916	0.0060241	0.134657	NA	109.254	10.4028	122.013	NA	0.895425	NA	-0.159355	2	2	2	2	2	2	0.300119	0.573627	Homo sapiens aurora kinase A pseudogene 1 (AURKAPS1), non-coding RNA.
ILMN_1684217	AURKB	0	0	0.0411192	NA	3218.82	93.5895	2305.96	NA	1.39587	NA	0.481164	2	2	2	2	2	2	0.00399772	0.0513252	Homo sapiens aurora kinase B (AURKB), mRNA.
ILMN_2350296	AURKC	0.0557229	0.0406627	0.0170445	NA	88.5924	1.06774	91.9888	NA	0.963078	NA	-0.0542759	2	2	2	2	2	2	0.713515	0.742726	Homo sapiens aurora kinase C (AURKC), transcript variant 2, mRNA.
ILMN_1675376	AURKC	0.350151	0.399096	0.0277111	NA	72.7628	1.42577	72.5126	NA	1.00345	NA	0.00497006	2	2	2	2	2	2	0.974725	0.797676	Homo sapiens aurora kinase C (AURKC), transcript variant 1, mRNA.
ILMN_1721333	AURKC	0.451807	0.826807	0.0517278	NA	71.0729	2.59964	63.7134	NA	1.11551	NA	0.157702	2	2	2	2	2	2	0.300561	0.573826	Homo sapiens aurora kinase C (AURKC), transcript variant 2, mRNA.
ILMN_1749081	AUTS2	0	0	0.0880165	NA	1285.95	80.034	1130.4	NA	1.13761	NA	0.18601	2	2	2	2	2	2	0.237196	0.523287	Homo sapiens autism susceptibility candidate 2 (AUTS2), mRNA.
ILMN_1710216	AVEN	0.00903614	0.0376506	0.142907	NA	111.263	11.2432	92.2921	NA	1.20555	NA	0.269695	2	2	2	2	2	2	0.111197	0.375571	Homo sapiens apoptosis, caspase activation inhibitor (AVEN), mRNA.
ILMN_1674265	AVIL	0.0941265	0.0376506	0.00544772	NA	82.6775	0.318483	92.9936	NA	0.889066	NA	-0.169638	2	2	2	2	2	2	0.258954	0.541845	Homo sapiens advillin (AVIL), mRNA.
ILMN_1722292	AVL9	0.00527108	0.0060241	0.0253231	NA	113.322	2.02916	116.554	NA	0.972273	NA	-0.0405673	2	2	2	2	2	2	0.783095	0.758718	Homo sapiens AVL9 homolog (S. cerevisiase) (AVL9), mRNA.
ILMN_2230117	AVP	0.36747	0.483434	0.0201025	NA	72.4351	1.02964	70.7777	NA	1.02342	NA	0.0333934	2	2	2	2	2	2	0.822274	0.767688	Homo sapiens arginine vasopressin (neurophysin II, antidiuretic hormone, diabetes insipidus, neurohypophyseal) (AVP), mRNA.
ILMN_1671731	AVPI1	0	0	0.0765964	NA	359.399	19.4657	364.336	NA	0.986449	NA	-0.019683	2	2	2	2	2	2	0.885245	0.780944	Homo sapiens arginine vasopressin-induced 1 (AVPI1), mRNA.
ILMN_1712159	AVPR1A	0.201054	0.216867	0.125267	NA	79.8092	7.06929	77.6352	NA	1.028	NA	0.039844	2	2	2	2	2	2	0.827293	0.769425	Homo sapiens arginine vasopressin receptor 1A (AVPR1A), mRNA.
ILMN_1680521	AVPR1B	0.26506	0.347892	0.0810449	NA	75.9372	4.35176	73.7108	NA	1.0302	NA	0.0429301	2	2	2	2	2	2	0.789013	0.759661	Homo sapiens arginine vasopressin receptor 1B (AVPR1B), mRNA.
ILMN_1698324	AVPR2	0.240964	0.376506	0.085751	NA	76.8697	4.661	73.2183	NA	1.04987	NA	0.0702113	2	2	2	2	2	2	0.657282	0.728837	Homo sapiens arginine vasopressin receptor 2 (nephrogenic diabetes insipidus) (AVPR2), mRNA.
ILMN_1703832	AWAT2	0.560994	0.582831	0.059331	NA	68.6848	2.88156	69.0307	NA	0.99499	NA	-0.00724596	2	2	2	2	2	2	0.954631	0.793313	Homo sapiens acyl-CoA wax alcohol acyltransferase 2 (AWAT2), mRNA.
ILMN_1766185	AXIN1	0	0	0.0621891	NA	1025.97	45.1165	930.434	NA	1.10268	NA	0.141016	2	2	2	2	2	2	0.357146	0.609263	Homo sapiens axin 1 (AXIN1), transcript variant 2, mRNA.
ILMN_1692967	AXIN1	0.0414157	0.346386	0.0304783	NA	92.2675	1.98849	73.8213	NA	1.24988	NA	0.321786	2	2	2	2	2	2	0.0406421	0.219953	Homo sapiens axin 1 (AXIN1), transcript variant 1, mRNA.
ILMN_1724480	AXIN2	0	0	0.0725267	NA	690.321	35.4025	595.426	NA	1.15937	NA	0.213345	2	2	2	2	2	2	0.171332	0.458777	Homo sapiens axin 2 (conductin, axil) (AXIN2), mRNA.
ILMN_1701877	AXL	0.0278614	0.00903614	0.0538495	NA	95.0947	3.62095	111.557	NA	0.852429	NA	-0.230348	2	2	2	2	2	2	0.132993	0.408582	Homo sapiens AXL receptor tyrosine kinase (AXL), transcript variant 1, mRNA.
ILMN_2364521	AXL	0.00978916	0.0120482	0.168501	NA	111.573	13.2938	107.16	NA	1.04119	NA	0.0582279	2	2	2	2	2	2	0.769492	0.755114	Homo sapiens AXL receptor tyrosine kinase (AXL), transcript variant 1, mRNA.
ILMN_1703123	AXUD1	0	0	0.0810399	NA	203.323	11.6512	307.883	NA	0.660389	NA	-0.598612	2	2	2	2	2	2	0.000735442	0.0167871	Homo sapiens AXIN1 up-regulated 1 (AXUD1), mRNA.
ILMN_1797154	AZGP1	0.392319	0.472892	0.270608	NA	80.5316	15.4096	71.0381	NA	1.13364	NA	0.180961	2	2	2	2	2	2	0.411462	0.637443	Homo sapiens alpha-2-glycoprotein 1, zinc-binding (AZGP1), mRNA.
ILMN_1746206	AZI1	0	0	0.0226339	NA	670.298	10.7278	789.934	NA	0.848549	NA	-0.23693	2	2	2	2	2	2	0.121003	0.391385	Homo sapiens 5-azacytidine induced 1 (AZI1), transcript variant 1, mRNA.
ILMN_1742262	AZI1	0.449548	0.239458	0.000761777	NA	70.7015	0.0380839	76.8325	NA	0.920203	NA	-0.119977	2	2	2	2	2	2	0.420661	0.641261	Homo sapiens 5-azacytidine induced 1 (AZI1), transcript variant 1, mRNA.
ILMN_1733680	AZI2	0.00978916	0.0376506	0.236792	NA	116.106	19.4404	92.6932	NA	1.25258	NA	0.324904	2	2	2	2	2	2	0.098515	0.35309	Homo sapiens 5-azacytidine induced 2 (AZI2), mRNA.
ILMN_2327994	AZIN1	0.228916	0.771084	0.0275901	NA	76.2379	1.48734	64.871	NA	1.17522	NA	0.232934	2	2	2	2	2	2	0.128052	0.401612	Homo sapiens antizyme inhibitor 1 (AZIN1), transcript variant 2, mRNA.
ILMN_1656682	AZIN1	0	0	0.138962	NA	1886.52	185.371	1160.49	NA	1.62562	NA	0.700991	2	2	2	2	2	2	0.000285467	0.0086746	Homo sapiens antizyme inhibitor 1 (AZIN1), transcript variant 1, mRNA.
ILMN_1704550	AZIN1	0	0	0.0175148	NA	308.824	3.82473	179.504	NA	1.72043	NA	0.78277	2	2	2	2	2	2	3.615e-05	0.00195128	Homo sapiens antizyme inhibitor 1 (AZIN1), transcript variant 1, mRNA.
ILMN_1730867	AZU1	0.635542	0.411145	0.0920492	NA	67.2212	4.37534	72.1281	NA	0.93197	NA	-0.101644	2	2	2	2	2	2	0.49502	0.674003	Homo sapiens azurocidin 1 (AZU1), mRNA.
ILMN_2148459	B2M	0	0	0.0907417	NA	209.724	13.4567	205.714	NA	1.01949	NA	0.027851	2	2	2	2	2	2	0.870349	0.778379	Homo sapiens beta-2-microglobulin (B2M), mRNA.
ILMN_1726840	B3GALNT1	0.13253	0.0165663	0.152616	NA	85.2263	9.19724	102.253	NA	0.833481	NA	-0.262779	2	2	2	2	2	2	0.103384	0.362013	Homo sapiens beta-1,3-N-acetylgalactosaminyltransferase 1 (globoside blood group) (B3GALNT1), transcript variant 2, mRNA.
ILMN_2325347	B3GALNT1	0	0.00451807	0.0188597	NA	188.695	2.5164	138.298	NA	1.3644	NA	0.448269	2	2	2	2	2	2	0.00632201	0.0698775	Homo sapiens beta-1,3-N-acetylgalactosaminyltransferase 1 (globoside blood group) (B3GALNT1), transcript variant 3, mRNA.
ILMN_1787595	B3GALNT1	0.00225904	0.0376506	0.0679746	NA	129.432	6.22121	92.7389	NA	1.39566	NA	0.480951	2	2	2	2	2	2	0.0044211	0.0551731	Homo sapiens beta-1,3-N-acetylgalactosaminyltransferase 1 (globoside blood group) (B3GALNT1), transcript variant 2, mRNA.
ILMN_1780188	B3GALNT2	0.000753012	0.0060241	0.0813605	NA	143.969	8.28264	116.588	NA	1.23486	NA	0.304345	2	2	2	2	2	2	0.0577507	0.266619	Homo sapiens beta-1,3-N-acetylgalactosaminyltransferase 2 (B3GALNT2), mRNA.
ILMN_1659202	B3GALT1	0.0353916	0.0828313	0.00547752	NA	92.4954	0.358252	84.4952	NA	1.09468	NA	0.130511	2	2	2	2	2	2	0.381886	0.622641	Homo sapiens UDP-Gal:betaGlcNAc beta 1,3-galactosyltransferase, polypeptide 1 (B3GALT1), mRNA.
ILMN_1709907	B3GALT2	0.384789	0.317771	0.206053	NA	77.3343	11.2677	74.7566	NA	1.03448	NA	0.0489071	2	2	2	2	2	2	0.844761	0.773126	Homo sapiens UDP-Gal:betaGlcNAc beta 1,3-galactosyltransferase, polypeptide 2 (B3GALT2), mRNA.
ILMN_1815287	B3GALT3	0.35994	0.135542	0.128752	NA	75.2568	6.8515	80.9005	NA	0.930239	NA	-0.104327	2	2	2	2	2	2	0.485008	0.669098	Homo sapiens UDP-Gal:betaGlcNAc beta 1,3-galactosyltransferase, polypeptide 3 (B3GALT3), transcript variant 4, mRNA.
ILMN_1690682	B3GALT4	0.306476	0.513554	0.0145678	NA	73.8208	0.76043	70.2404	NA	1.05097	NA	0.0717261	2	2	2	2	2	2	0.628936	0.71983	Homo sapiens UDP-Gal:betaGlcNAc beta 1,3-galactosyltransferase, polypeptide 4 (B3GALT4), mRNA.
ILMN_1800713	B3GALT5	0.103916	0.0376506	0.000515097	NA	82.0784	0.0298953	93.0205	NA	0.882368	NA	-0.180547	2	2	2	2	2	2	0.230587	0.517872	Homo sapiens UDP-Gal:betaGlcNAc beta 1,3-galactosyltransferase, polypeptide 5 (B3GALT5), transcript variant 1, mRNA.
ILMN_1698756	B3GALT5	0.34262	0.394578	0.0107636	NA	72.8783	0.554679	72.642	NA	1.00325	NA	0.0046844	2	2	2	2	2	2	0.974933	0.79773	Homo sapiens UDP-Gal:betaGlcNAc beta 1,3-galactosyltransferase, polypeptide 5 (B3GALT5), transcript variant 5, mRNA.
ILMN_2378654	B3GALT5	0.34488	0.506024	0.034632	NA	72.995	1.78754	70.3455	NA	1.03766	NA	0.05334	2	2	2	2	2	2	0.721858	0.74442	Homo sapiens UDP-Gal:betaGlcNAc beta 1,3-galactosyltransferase, polypeptide 5 (B3GALT5), transcript variant 4, mRNA.
ILMN_1739749	B3GALT6	0	0	0.150001	NA	527.838	55.9859	433.129	NA	1.21866	NA	0.285298	2	2	2	2	2	2	0.0957654	0.348854	Homo sapiens UDP-Gal:betaGal beta 1,3-galactosyltransferase polypeptide 6 (B3GALT6), mRNA.
ILMN_1764813	B3GALTL	0.00451807	0.0105422	0.0653076	NA	117.327	5.4181	110.535	NA	1.06144	NA	0.0860245	2	2	2	2	2	2	0.575203	0.70154	Homo sapiens beta 1,3-galactosyltransferase-like (B3GALTL), mRNA.
ILMN_2371440	B3GAT1	0	0.00301205	0.155026	NA	170.385	18.6775	147.127	NA	1.15808	NA	0.21173	2	2	2	2	2	2	0.216815	0.504041	Homo sapiens beta-1,3-glucuronyltransferase 1 (glucuronosyltransferase P) (B3GAT1), transcript variant 1, mRNA.
ILMN_1794072	B3GAT1	0.135542	0.439759	0.172825	NA	85.8516	10.4915	71.7143	NA	1.19713	NA	0.259584	2	2	2	2	2	2	0.14113	0.419755	Homo sapiens beta-1,3-glucuronyltransferase 1 (glucuronosyltransferase P) (B3GAT1), transcript variant 2, mRNA.
ILMN_1761093	B3GAT1	0	0.00451807	0.104198	NA	234.345	17.2664	136.453	NA	1.7174	NA	0.780228	2	2	2	2	2	2	6.26394e-05	0.00292073	Homo sapiens beta-1,3-glucuronyltransferase 1 (glucuronosyltransferase P) (B3GAT1), transcript variant 1, mRNA.
ILMN_1774208	B3GAT2	0.749247	0.689759	0.0237986	NA	65.6386	1.10458	66.8428	NA	0.981984	NA	-0.0262282	2	2	2	2	2	2	0.858322	0.775049	Homo sapiens beta-1,3-glucuronyltransferase 2 (glucuronosyltransferase S) (B3GAT2), mRNA.
ILMN_2210581	B3GAT3	0	0	0.0698019	NA	297.259	14.6719	310.191	NA	0.95831	NA	-0.061436	2	2	2	2	2	2	0.675203	0.733485	Homo sapiens beta-1,3-glucuronyltransferase 3 (glucuronosyltransferase I) (B3GAT3), mRNA.
ILMN_1711102	B3GNT2	0	0	0.0998975	NA	363.025	25.6435	322.888	NA	1.12431	NA	0.169036	2	2	2	2	2	2	0.288008	0.565107	Homo sapiens UDP-GlcNAc:betaGal beta-1,3-N-acetylglucosaminyltransferase 2 (B3GNT2), mRNA.
ILMN_1800082	B3GNT3	0.398343	0.0376506	0.177059	NA	75.3779	9.43727	93.0581	NA	0.81001	NA	-0.303989	2	2	2	2	2	2	0.0676693	0.289593	Homo sapiens UDP-GlcNAc:betaGal beta-1,3-N-acetylglucosaminyltransferase 3 (B3GNT3), mRNA.
ILMN_1771260	B3GNT4	0.209337	0.0768072	0.0323523	NA	77.0226	1.76201	85.2536	NA	0.903454	NA	-0.146478	2	2	2	2	2	2	0.328273	0.593284	Homo sapiens UDP-GlcNAc:betaGal beta-1,3-N-acetylglucosaminyltransferase 4 (B3GNT4), mRNA.
ILMN_1702609	B3GNT5	0.810241	0.60241	0.00975063	NA	64.3459	0.443648	68.6079	NA	0.937879	NA	-0.0925262	2	2	2	2	2	2	0.533134	0.687707	Homo sapiens UDP-GlcNAc:betaGal beta-1,3-N-acetylglucosaminyltransferase 5 (B3GNT5), mRNA.
ILMN_1715384	B3GNT6	0	0	0.0042537	NA	567.673	1.70746	517.26	NA	1.09746	NA	0.134171	2	2	2	2	2	2	0.368921	0.615921	Homo sapiens UDP-GlcNAc:betaGal beta-1,3-N-acetylglucosaminyltransferase 6 (B3GNT6), mRNA.
ILMN_1680081	B3Gn-T6	0.600904	0.141566	0.0356364	NA	68.2159	1.71896	80.6702	NA	0.845615	NA	-0.241927	2	2	2	2	2	2	0.114449	0.380662	Homo sapiens beta-1,3-N-acetylglucosaminyltransferase protein (B3Gn-T6), mRNA.
ILMN_1721523	B3GNT7	0.180723	0.75753	0.0793733	NA	79.0891	4.43891	65.3033	NA	1.2111	NA	0.276323	2	2	2	2	2	2	0.0821723	0.321904	Homo sapiens UDP-GlcNAc:betaGal beta-1,3-N-acetylglucosaminyltransferase 7 (B3GNT7), mRNA.
ILMN_1741389	B3GNT8	0.0301205	0.168675	0.0585453	NA	94.7915	3.92416	79.1803	NA	1.19716	NA	0.259616	2	2	2	2	2	2	0.0964019	0.34973	Homo sapiens UDP-GlcNAc:betaGal beta-1,3-N-acetylglucosaminyltransferase 8 (B3GNT8), mRNA.
ILMN_1783908	B3GNT9	0.295181	0.548193	0.00659862	NA	74.0485	0.345505	69.5264	NA	1.06504	NA	0.0909079	2	2	2	2	2	2	0.540384	0.690958	Homo sapiens UDP-GlcNAc:betaGal beta-1,3-N-acetylglucosaminyltransferase 9 (B3GNT9), mRNA.
ILMN_1702817	B3GNTL1	0.0105422	0.233434	0.0882266	NA	108.225	6.75167	76.9073	NA	1.40721	NA	0.492838	2	2	2	2	2	2	0.00409902	0.0523518	Homo sapiens UDP-GlcNAc:betaGal beta-1,3-N-acetylglucosaminyltransferase-like 1 (B3GNTL1), mRNA.
ILMN_1805725	B4GALNT1	0.0768072	0.224398	0.0596654	NA	86.0198	3.62916	77.3103	NA	1.11266	NA	0.154009	2	2	2	2	2	2	0.31434	0.583302	Homo sapiens beta-1,4-N-acetyl-galactosaminyl transferase 1 (B4GALNT1), mRNA.
ILMN_1707200	B4GALNT2	0.962349	0.932229	0.0342912	NA	58.2981	1.41359	60.3289	NA	0.966339	NA	-0.049399	2	2	2	2	2	2	0.737383	0.747816	Homo sapiens beta-1,4-N-acetyl-galactosaminyl transferase 2 (B4GALNT2), mRNA.
ILMN_1753271	B4GALNT3	0.531627	0.480422	0.0555905	NA	69.4596	2.73035	70.8575	NA	0.980272	NA	-0.028746	2	2	2	2	2	2	0.841714	0.772297	Homo sapiens beta-1,4-N-acetyl-galactosaminyl transferase 3 (B4GALNT3), mRNA.
ILMN_1796663	B4GALNT4	0.000753012	0.00301205	0.0676177	NA	152.582	7.29539	155.878	NA	0.978858	NA	-0.0308285	2	2	2	2	2	2	0.829007	0.769838	Homo sapiens beta-1,4-N-acetyl-galactosaminyl transferase 4 (B4GALNT4), mRNA.
ILMN_1766221	B4GALT1	0.326054	0.0768072	0.0626324	NA	73.9596	3.27551	85.512	NA	0.864903	NA	-0.209391	2	2	2	2	2	2	0.170515	0.457774	Homo sapiens UDP-Gal:betaGlcNAc beta 1,4- galactosyltransferase, polypeptide 1 (B4GALT1), mRNA.
ILMN_1753755	B4GALT2	0.00753012	0.00451807	0.0257612	NA	111.101	2.02381	141.322	NA	0.786155	NA	-0.347114	2	2	2	2	2	2	0.0281664	0.177102	Homo sapiens UDP-Gal:betaGlcNAc beta 1,4- galactosyltransferase, polypeptide 2 (B4GALT2), transcript variant 2, mRNA.
ILMN_1806508	B4GALT2	0.191265	0.0768072	0.158339	NA	81.7743	9.15563	85.3305	NA	0.958324	NA	-0.0614147	2	2	2	2	2	2	0.663299	0.730639	Homo sapiens UDP-Gal:betaGlcNAc beta 1,4- galactosyltransferase, polypeptide 2 (B4GALT2), transcript variant 2, mRNA.
ILMN_1680732	B4GALT2	0.411145	0.421687	0.00136864	NA	71.3124	0.0690143	71.9777	NA	0.990756	NA	-0.0133976	2	2	2	2	2	2	0.927722	0.787224	Homo sapiens UDP-Gal:betaGlcNAc beta 1,4- galactosyltransferase, polypeptide 2 (B4GALT2), transcript variant 3, mRNA.
ILMN_1692267	B4GALT3	0	0	0.170255	NA	345.372	41.5787	926.582	NA	0.372737	NA	-1.42377	2	2	2	2	2	2	3.5824e-08	1.27861e-05	Homo sapiens UDP-Gal:betaGlcNAc beta 1,4- galactosyltransferase, polypeptide 3 (B4GALT3), mRNA.
ILMN_1661500	B4GALT4	0	0	0.187122	NA	243.472	32.215	226.158	NA	1.07656	NA	0.106426	2	2	2	2	2	2	0.575948	0.701839	Homo sapiens UDP-Gal:betaGlcNAc beta 1,4- galactosyltransferase, polypeptide 4 (B4GALT4), transcript variant 2, mRNA.
ILMN_2380688	B4GALT4	0.00451807	0.0105422	0.0848645	NA	119.477	7.16959	110.708	NA	1.07921	NA	0.109972	2	2	2	2	2	2	0.482232	0.668148	Homo sapiens UDP-Gal:betaGlcNAc beta 1,4- galactosyltransferase, polypeptide 4 (B4GALT4), transcript variant 2, mRNA.
ILMN_1685824	B4GALT5	0	0	0.120621	NA	1592.23	135.804	1973.85	NA	0.806661	NA	-0.309965	2	2	2	2	2	2	0.0545493	0.258464	Homo sapiens UDP-Gal:betaGlcNAc beta 1,4- galactosyltransferase, polypeptide 5 (B4GALT5), mRNA.
ILMN_1732555	B4GALT6	0.188253	0.284639	0.0288846	NA	77.6861	1.5867	75.8036	NA	1.02483	NA	0.0353898	2	2	2	2	2	2	0.81293	0.765519	Homo sapiens UDP-Gal:betaGlcNAc beta 1,4- galactosyltransferase, polypeptide 6 (B4GALT6), mRNA.
ILMN_1663541	B4GALT7	0	0	0.164394	NA	535.199	62.2138	685.155	NA	0.781136	NA	-0.356355	2	2	2	2	2	2	0.0342522	0.199223	Homo sapiens xylosylprotein beta 1,4-galactosyltransferase, polypeptide 7 (galactosyltransferase I) (B4GALT7), mRNA.
ILMN_1806999	B9D2	0.00903614	0.0286145	0.0603003	NA	108.3	4.61777	96.9058	NA	1.11758	NA	0.160376	2	2	2	2	2	2	0.295359	0.569937	Homo sapiens B9 protein domain 2 (B9D2), mRNA.
ILMN_1707717	BAALC	0.432229	0.436747	0.147986	NA	73.2216	7.66204	71.744	NA	1.0206	NA	0.0294124	2	2	2	2	2	2	0.893181	0.78211	Homo sapiens brain and acute leukemia, cytoplasmic (BAALC), transcript variant 1, mRNA.
ILMN_1687751	BAALC	0.0384036	0.0768072	0.107728	NA	94.2768	7.18158	85.5153	NA	1.10246	NA	0.14072	2	2	2	2	2	2	0.381018	0.622431	Homo sapiens brain and acute leukemia, cytoplasmic (BAALC), transcript variant 2, mRNA.
ILMN_1771308	BAAT	0.628012	0.623494	0.118206	NA	67.1086	5.60922	68.2462	NA	0.983331	NA	-0.0242503	2	2	2	2	2	2	0.850612	0.773678	Homo sapiens bile acid Coenzyme A: amino acid N-acyltransferase (glycine N-choloyltransferase) (BAAT), mRNA.
ILMN_2320349	BACE1	0.487199	0.0843374	0.0707385	NA	70.4342	3.52309	84.4212	NA	0.834318	NA	-0.26133	2	2	2	2	2	2	0.0926394	0.34232	Homo sapiens beta-site APP-cleaving enzyme 1 (BACE1), transcript variant b, mRNA.
ILMN_1797804	BACE1	0.0978916	0.191265	0.133465	NA	86.9542	8.20619	78.2179	NA	1.11169	NA	0.152756	2	2	2	2	2	2	0.358858	0.610175	Homo sapiens beta-site APP-cleaving enzyme 1 (BACE1), transcript variant c, mRNA.
ILMN_1669323	BACE2	0.411145	0.396084	0.0200175	NA	71.3988	1.01062	72.578	NA	0.983753	NA	-0.0236324	2	2	2	2	2	2	0.872336	0.778546	Homo sapiens beta-site APP-cleaving enzyme 2 (BACE2), transcript variant b, mRNA.
ILMN_2326712	BACE2	0.560241	0.620482	0.052055	NA	68.7866	2.53193	68.2635	NA	1.00766	NA	0.0110141	2	2	2	2	2	2	0.946385	0.791159	Homo sapiens beta-site APP-cleaving enzyme 2 (BACE2), transcript variant c, mRNA.
ILMN_1681583	BACH1	0.503012	0.329819	0.067597	NA	70.0951	3.35043	74.441	NA	0.94162	NA	-0.0867833	2	2	2	2	2	2	0.558081	0.696545	Homo sapiens BTB and CNC homology 1, basic leucine zipper transcription factor 1 (BACH1), transcript variant 1, mRNA.
ILMN_1751149	BACH1	0.364458	0.245482	0.0318093	NA	72.4028	1.62852	76.4882	NA	0.946588	NA	-0.079191	2	2	2	2	2	2	0.592987	0.708495	Homo sapiens BTB and CNC homology 1, basic leucine zipper transcription factor 1 (BACH1), transcript variant 3, mRNA.
ILMN_1807181	BACH1	0.0662651	0.063253	0.0619815	NA	86.7269	3.80103	87.8922	NA	0.986742	NA	-0.0192545	2	2	2	2	2	2	0.890487	0.781615	Homo sapiens BTB and CNC homology 1, basic leucine zipper transcription factor 1 (BACH1), transcript variant 3, mRNA.
ILMN_1659943	BACH2	0.551205	0.364458	0.022724	NA	69.0556	1.10961	73.391	NA	0.940927	NA	-0.0878457	2	2	2	2	2	2	0.553801	0.694734	Homo sapiens BTB and CNC homology 1, basic leucine zipper transcription factor 2 (BACH2), mRNA.
ILMN_2058468	BACH2	0.338855	0.114458	0.23335	NA	80.8517	13.3408	82.4551	NA	0.980554	NA	-0.0283307	2	2	2	2	2	2	0.785033	0.759207	Homo sapiens BTB and CNC homology 1, basic leucine zipper transcription factor 2 (BACH2), mRNA.
ILMN_1738652	BAD	0	0	0.0710558	NA	451.864	22.7035	543.249	NA	0.83178	NA	-0.265726	2	2	2	2	2	2	0.0877345	0.332842	Homo sapiens BCL2-antagonist of cell death (BAD), transcript variant 2, mRNA.
ILMN_1685398	BAD	0.0188253	0.0105422	0.0634517	NA	99.8472	4.47986	107.976	NA	0.924715	NA	-0.11292	2	2	2	2	2	2	0.449235	0.653097	Homo sapiens BCL2-antagonist of cell death (BAD), transcript variant 2, mRNA.
ILMN_1720360	BAD	0	0.00150602	0.0329853	NA	181.639	4.23657	162.707	NA	1.11635	NA	0.158794	2	2	2	2	2	2	0.292745	0.568746	Homo sapiens BCL2-antagonist of cell death (BAD), transcript variant 1, mRNA.
ILMN_1733970	BAG1	0.0865964	0.388554	0.0549182	NA	84.4203	3.2783	72.8217	NA	1.15927	NA	0.213222	2	2	2	2	2	2	0.166584	0.453233	Homo sapiens BCL2-associated athanogene (BAG1), mRNA.
ILMN_1659766	BAG3	0	0	0.00607422	NA	400.648	1.72083	416.427	NA	0.962109	NA	-0.0557273	2	2	2	2	2	2	0.70643	0.741593	Homo sapiens BCL2-associated athanogene 3 (BAG3), mRNA.
ILMN_2221014	BAG4	0.0971386	0.0225904	0.0247347	NA	83.0014	1.4517	98.3696	NA	0.843772	NA	-0.245076	2	2	2	2	2	2	0.109595	0.372067	Homo sapiens BCL2-associated athanogene 4 (BAG4), mRNA.
ILMN_1728514	BAG5	0.000753012	0	0.137309	NA	180.084	17.4847	224.598	NA	0.801804	NA	-0.318679	2	2	2	2	2	2	0.0508831	0.249151	Homo sapiens BCL2-associated athanogene 5 (BAG5), transcript variant 3, mRNA.
ILMN_2268855	BAG5	0.223645	0.0301205	0.155513	NA	80.5037	8.85252	95.3205	NA	0.844558	NA	-0.243732	2	2	2	2	2	2	0.128768	0.402732	Homo sapiens BCL2-associated athanogene 5 (BAG5), transcript variant 3, mRNA.
ILMN_1751396	BAG5	0.545181	0.665663	0.0987608	NA	69.3938	4.84608	67.4265	NA	1.02918	NA	0.0414919	2	2	2	2	2	2	0.804436	0.763158	Homo sapiens BCL2-associated athanogene 5 (BAG5), transcript variant 1, mRNA.
ILMN_2361695	BAG5	0	0	0.0267126	NA	1156.41	21.843	1080.25	NA	1.0705	NA	0.0982809	2	2	2	2	2	2	0.510517	0.679676	Homo sapiens BCL2-associated athanogene 5 (BAG5), transcript variant 2, mRNA.
ILMN_1768994	BAGE	0.0926205	0.0331325	0.10081	NA	84.9626	6.05645	93.933	NA	0.904502	NA	-0.144805	2	2	2	2	2	2	0.339164	0.598941	Homo sapiens B melanoma antigen (BAGE), mRNA.
ILMN_2168766	BAGE2	0.684488	0.402108	0.0836707	NA	66.3728	3.92689	72.3914	NA	0.91686	NA	-0.125227	2	2	2	2	2	2	0.404016	0.633694	Homo sapiens B melanoma antigen family, member 2 (BAGE2), mRNA.
ILMN_2069267	BAGE3	0.670934	0.635542	0.0226516	NA	67.0419	1.07381	67.9421	NA	0.986749	NA	-0.0192443	2	2	2	2	2	2	0.895563	0.782402	Homo sapiens B melanoma antigen family, member 3 (BAGE3), mRNA.
ILMN_2138135	BAGE4	0.519578	0.498494	0.0172553	NA	69.5598	0.848721	70.4618	NA	0.987197	NA	-0.0185895	2	2	2	2	2	2	0.899394	0.783253	Homo sapiens B melanoma antigen family, member 4 (BAGE4), mRNA.
ILMN_2206141	BAGE5	0.201054	0.337349	0.0301712	NA	76.8878	1.64035	74.3327	NA	1.03437	NA	0.0487574	2	2	2	2	2	2	0.744199	0.749738	Homo sapiens B melanoma antigen family, member 5 (BAGE5), mRNA.
ILMN_1739256	BAHD1	0.15738	0.0813253	0.144684	NA	82.7702	8.46798	84.9862	NA	0.973926	NA	-0.0381163	2	2	2	2	2	2	0.77446	0.756247	Homo sapiens bromo adjacent homology domain containing 1 (BAHD1), mRNA.
ILMN_1729529	BAI1	0.100151	0.0286145	0.0126267	NA	82.4079	0.73577	96.7119	NA	0.852097	NA	-0.23091	2	2	2	2	2	2	0.129838	0.40357	PREDICTED: Homo sapiens brain-specific angiogenesis inhibitor 1, transcript variant 1 (BAI1), mRNA.
ILMN_1763869	BAI1	0.893825	0.490964	0.0769961	NA	61.1393	3.32869	70.6002	NA	0.865994	NA	-0.207572	2	2	2	2	2	2	0.175722	0.46445	Homo sapiens brain-specific angiogenesis inhibitor 1 (BAI1), mRNA.
ILMN_1797130	BAI1	0.489458	0.737952	0.111738	NA	70.8881	5.60092	65.7773	NA	1.0777	NA	0.107954	2	2	2	2	2	2	0.506327	0.677996	Homo sapiens brain-specific angiogenesis inhibitor 1 (BAI1), mRNA.
ILMN_1773109	BAI2	0.458584	0.191265	0.0443928	NA	70.8931	2.22536	78.215	NA	0.906388	NA	-0.1418	2	2	2	2	2	2	0.344101	0.60203	Homo sapiens brain-specific angiogenesis inhibitor 2 (BAI2), mRNA.
ILMN_1671076	BAI3	0.653614	0.346386	0.152758	NA	65.6303	7.08915	73.7512	NA	0.889888	NA	-0.168304	2	2	2	2	2	2	0.278756	0.557404	Homo sapiens brain-specific angiogenesis inhibitor 3 (BAI3), mRNA.
ILMN_2258749	BAIAP2	0.00753012	0.0060241	0.0183111	NA	109.993	1.42418	113.056	NA	0.972911	NA	-0.0396199	2	2	2	2	2	2	0.788328	0.759618	Homo sapiens BAI1-associated protein 2 (BAIAP2), transcript variant 1, mRNA.
ILMN_1705922	BAIAP2	0	0	0.177942	NA	286.34	36.0285	255.843	NA	1.1192	NA	0.162471	2	2	2	2	2	2	0.365692	0.61382	Homo sapiens BAI1-associated protein 2 (BAIAP2), transcript variant 3, mRNA.
ILMN_1699727	BAIAP2	0.00753012	0.0256024	0.0340643	NA	110.28	2.65631	97.6022	NA	1.12989	NA	0.176181	2	2	2	2	2	2	0.244754	0.530116	Homo sapiens BAI1-associated protein 2 (BAIAP2), transcript variant 3, mRNA.
ILMN_2247226	BAIAP2	0.292922	0.837349	0.0635934	NA	74.7511	3.36136	63.5661	NA	1.17596	NA	0.233838	2	2	2	2	2	2	0.133031	0.408602	Homo sapiens BAI1-associated protein 2 (BAIAP2), transcript variant 2, mRNA.
ILMN_1703593	BAIAP2L1	0.000753012	0	0.0411498	NA	145.494	4.23347	239.833	NA	0.606645	NA	-0.721076	2	2	2	2	2	2	9.66016e-05	0.00404331	Homo sapiens BAI1-associated protein 2-like 1 (BAIAP2L1), mRNA.
ILMN_1771652	BAIAP2L2	0	0	0.0152641	NA	450.005	4.85707	480.28	NA	0.936965	NA	-0.0939331	2	2	2	2	2	2	0.526997	0.684924	Homo sapiens BAI1-associated protein 2-like 2 (BAIAP2L2), mRNA.
ILMN_1810550	BAIAP3	0.832078	0.168675	0.00367311	NA	63.8093	0.165731	79.1494	NA	0.806188	NA	-0.310812	2	2	2	2	2	2	0.0463031	0.236396	Homo sapiens BAI1-associated protein 3 (BAIAP3), mRNA.
ILMN_1805990	BAK1	0	0	0.0855428	NA	199.446	12.0641	243.143	NA	0.820283	NA	-0.285806	2	2	2	2	2	2	0.0694139	0.292817	Homo sapiens BCL2-antagonist/killer 1 (BAK1), mRNA.
ILMN_1691410	BAMBI	0	0	0.0988598	NA	540.616	37.7914	350.577	NA	1.54208	NA	0.624873	2	2	2	2	2	2	0.000602523	0.0146382	Homo sapiens BMP and activin membrane-bound inhibitor homolog (Xenopus laevis) (BAMBI), mRNA.
ILMN_2179837	BANF1	0	0	0.0583245	NA	9168.54	378.126	7521.46	NA	1.21898	NA	0.28568	2	2	2	2	2	2	0.0692321	0.292561	Homo sapiens barrier to autointegration factor 1 (BANF1), mRNA.
ILMN_1805823	BANF2	0.568524	0.323795	0.084204	NA	68.8803	4.10122	74.5314	NA	0.924178	NA	-0.113757	2	2	2	2	2	2	0.446821	0.652312	Homo sapiens barrier to autointegration factor 2 (BANF2), transcript variant 2, mRNA.
ILMN_1661646	BANK1	0.221386	0.0677711	0.0707023	NA	77.3737	3.86822	86.5357	NA	0.894124	NA	-0.161453	2	2	2	2	2	2	0.285581	0.563136	Homo sapiens B-cell scaffold protein with ankyrin repeats 1 (BANK1), transcript variant 2, mRNA.
ILMN_2396338	BANP	0.00150602	0.0060241	0.00915138	NA	136.337	0.882239	123.553	NA	1.10347	NA	0.142046	2	2	2	2	2	2	0.34231	0.601362	Homo sapiens BTG3 associated nuclear protein (BANP), transcript variant 1, mRNA.
ILMN_1768363	BAP1	0	0	0.0980427	NA	306.081	21.2195	416.97	NA	0.734059	NA	-0.446031	2	2	2	2	2	2	0.0078175	0.0810667	Homo sapiens BRCA1 associated protein-1 (ubiquitin carboxy-terminal hydrolase) (BAP1), mRNA.
ILMN_1782004	BAPX1	0.000753012	0.00150602	0.138702	NA	166.697	16.3493	159.313	NA	1.04635	NA	0.0653651	2	2	2	2	2	2	0.712922	0.742612	Homo sapiens bagpipe homeobox homolog 1 (Drosophila) (BAPX1), mRNA.
ILMN_2074258	BARD1	0	0	0.0267831	NA	1053	19.9422	1243.92	NA	0.846514	NA	-0.240395	2	2	2	2	2	2	0.116164	0.383165	Homo sapiens BRCA1 associated RING domain 1 (BARD1), mRNA.
ILMN_1737662	BARHL1	0.478163	0.218373	0.06171	NA	70.6937	3.08476	77.5196	NA	0.911946	NA	-0.13298	2	2	2	2	2	2	0.375064	0.618888	Homo sapiens BarH-like homeobox 1 (BARHL1), mRNA.
ILMN_1706493	BARHL2	0.146084	0.304217	0.160665	NA	84.6874	9.62113	75.3032	NA	1.12462	NA	0.169437	2	2	2	2	2	2	0.32922	0.593589	Homo sapiens BarH-like homeobox 2 (BARHL2), mRNA.
ILMN_1772312	BARX1	0.0707831	0.0120482	0.0820977	NA	87.4347	5.07574	106.736	NA	0.819167	NA	-0.287771	2	2	2	2	2	2	0.0673381	0.288623	Homo sapiens BARX homeobox 1 (BARX1), mRNA.
ILMN_1701170	BARX2	0.128765	0.375	0.0184018	NA	80.5759	1.04846	73.2757	NA	1.09963	NA	0.137015	2	2	2	2	2	2	0.360062	0.611061	Homo sapiens BARX homeobox 2 (BARX2), mRNA.
ILMN_1651826	BASP1	0	0	0.209574	NA	5338.52	791.122	5157.67	NA	1.03506	NA	0.0497199	2	2	2	2	2	2	0.844182	0.773104	Homo sapiens brain abundant, membrane attached signal protein 1 (BASP1), mRNA.
ILMN_1690576	BAT1	0.00753012	0.0060241	0.0249537	NA	110.168	1.94391	130.341	NA	0.845228	NA	-0.242587	2	2	2	2	2	2	0.113011	0.378702	Homo sapiens HLA-B associated transcript 1 (BAT1), transcript variant 1, mRNA.
ILMN_2357976	BAT1	0.00225904	0.00301205	0.0529948	NA	134.328	5.03367	146.178	NA	0.918932	NA	-0.121969	2	2	2	2	2	2	0.414285	0.638516	Homo sapiens HLA-B associated transcript 1 (BAT1), transcript variant 2, mRNA.
ILMN_1686626	BAT1	0	0	0.195633	NA	5665.67	783.751	4370.56	NA	1.29633	NA	0.374428	2	2	2	2	2	2	0.0431269	0.227997	Homo sapiens HLA-B associated transcript 1 (BAT1), transcript variant 2, mRNA.
ILMN_1760563	BAT2	0	0	0.111263	NA	866.726	68.1895	727.266	NA	1.19176	NA	0.253093	2	2	2	2	2	2	0.119888	0.389835	Homo sapiens HLA-B associated transcript 2 (BAT2), mRNA.
ILMN_2408179	BAT2	0	0	0.184899	NA	808.168	105.662	549.252	NA	1.4714	NA	0.557186	2	2	2	2	2	2	0.00363523	0.0481132	Homo sapiens HLA-B associated transcript 2 (BAT2), transcript variant 1, mRNA.
ILMN_1743137	BAT2D1	0	0	0.0684204	NA	1852.12	89.6066	776.119	NA	2.38639	NA	1.25483	2	2	2	2	2	2	7.73392e-08	2.13829e-05	Homo sapiens BAT2 domain containing 1 (BAT2D1), mRNA.
ILMN_1705364	BAT3	0	0	0.0154265	NA	169.606	1.85009	189.888	NA	0.893186	NA	-0.162967	2	2	2	2	2	2	0.277691	0.556715	Homo sapiens HLA-B associated transcript 3 (BAT3), transcript variant 2, mRNA.
ILMN_2390416	BAT3	0	0	0.0348752	NA	636.573	15.6982	630.105	NA	1.01027	NA	0.0147352	2	2	2	2	2	2	0.923253	0.786629	Homo sapiens HLA-B associated transcript 3 (BAT3), transcript variant 3, mRNA.
ILMN_1742782	BAT4	0.0489458	0.191265	0.0493728	NA	90.9509	3.17526	78.1397	NA	1.16395	NA	0.219032	2	2	2	2	2	2	0.154607	0.437883	Homo sapiens HLA-B associated transcript 4 (BAT4), mRNA.
ILMN_2152402	BAT5	0	0	0.055908	NA	450.737	17.819	341.107	NA	1.3214	NA	0.402062	2	2	2	2	2	2	0.0136895	0.114481	Homo sapiens HLA-B associated transcript 5 (BAT5), mRNA.
ILMN_1668822	BATF	0.506777	0.623494	0.0595899	NA	70.0295	2.95079	68.1701	NA	1.02728	NA	0.038823	2	2	2	2	2	2	0.802167	0.762873	Homo sapiens basic leucine zipper transcription factor, ATF-like (BATF), mRNA.
ILMN_1690241	BATF2	0.365211	0.108434	0.0780367	NA	73.497	4.05558	82.7729	NA	0.887936	NA	-0.171473	2	2	2	2	2	2	0.258781	0.541735	Homo sapiens basic leucine zipper transcription factor, ATF-like 2 (BATF2), mRNA.
ILMN_1763207	BATF3	0.00978916	0.0060241	0.0366075	NA	105.313	2.72606	126.668	NA	0.831404	NA	-0.266379	2	2	2	2	2	2	0.084389	0.326548	Homo sapiens basic leucine zipper transcription factor, ATF-like 3 (BATF3), mRNA.
ILMN_1683300	BAX	0.189759	0.0286145	0.131412	NA	80.7655	7.50492	96.0977	NA	0.840453	NA	-0.250762	2	2	2	2	2	2	0.11439	0.380528	Homo sapiens BCL2-associated X protein (BAX), transcript variant beta, mRNA.
ILMN_2258383	BAX	0.133283	0.364458	0.0281207	NA	80.4488	1.59967	73.4408	NA	1.09542	NA	0.131489	2	2	2	2	2	2	0.380756	0.622186	Homo sapiens BCL2-associated X protein (BAX), transcript variant epsilon, mRNA.
ILMN_2321064	BAX	0	0	0.151347	NA	1229.15	131.541	1050.07	NA	1.17053	NA	0.227168	2	2	2	2	2	2	0.182884	0.471932	Homo sapiens BCL2-associated X protein (BAX), transcript variant sigma, mRNA.
ILMN_1658327	BAZ1A	0.00451807	0.061747	0.032204	NA	118.621	2.70121	87.9971	NA	1.34801	NA	0.430836	2	2	2	2	2	2	0.00840686	0.0850164	Homo sapiens bromodomain adjacent to zinc finger domain, 1A (BAZ1A), transcript variant 1, mRNA.
ILMN_1742230	BAZ1A	0	0.00301205	0.0970044	NA	269.746	18.5025	155.629	NA	1.73326	NA	0.793487	2	2	2	2	2	2	4.824e-05	0.00245327	Homo sapiens bromodomain adjacent to zinc finger domain, 1A (BAZ1A), transcript variant 2, mRNA.
ILMN_1680831	BAZ1B	0	0	0.10232	NA	790.4	57.1864	572.609	NA	1.38035	NA	0.465034	2	2	2	2	2	2	0.00672273	0.0727903	Homo sapiens bromodomain adjacent to zinc finger domain, 1B (BAZ1B), transcript variant 1, mRNA.
ILMN_1676318	BAZ2A	0.0813253	0.191265	0.0459052	NA	84.6336	2.7472	78.1166	NA	1.08343	NA	0.115601	2	2	2	2	2	2	0.444144	0.651229	Homo sapiens bromodomain adjacent to zinc finger domain, 2A (BAZ2A), mRNA.
ILMN_1720850	BAZ2B	0	0	0.0977637	NA	439.696	30.3959	325.32	NA	1.35158	NA	0.434646	2	2	2	2	2	2	0.0101889	0.095795	Homo sapiens bromodomain adjacent to zinc finger domain, 2B (BAZ2B), mRNA.
ILMN_1729645	BBC3	0.760542	0.159639	0.0355914	NA	65.2041	1.64099	79.4283	NA	0.820918	NA	-0.28469	2	2	2	2	2	2	0.0665613	0.286775	Homo sapiens BCL2 binding component 3 (BBC3), mRNA.
ILMN_1734929	BBOX1	0.353163	0.13253	0.0281325	NA	72.5848	1.4439	81.0014	NA	0.896093	NA	-0.158279	2	2	2	2	2	2	0.291727	0.568405	Homo sapiens butyrobetaine (gamma), 2-oxoglutarate dioxygenase (gamma-butyrobetaine hydroxylase) 1 (BBOX1), mRNA.
ILMN_1800590	BBS1	0	0	0.0617406	NA	437.493	19.0997	473.494	NA	0.923968	NA	-0.114085	2	2	2	2	2	2	0.444637	0.651563	Homo sapiens Bardet-Biedl syndrome 1 (BBS1), mRNA.
ILMN_1741985	BBS10	0.0060241	0.0105422	0.116966	NA	119.218	9.86019	110.507	NA	1.07882	NA	0.109455	2	2	2	2	2	2	0.503797	0.67691	Homo sapiens Bardet-Biedl syndrome 10 (BBS10), mRNA.
ILMN_2166972	BBS12	0.0753012	0.0918675	0.0357233	NA	85.3901	2.15697	83.9689	NA	1.01692	NA	0.0242128	2	2	2	2	2	2	0.872893	0.778655	Homo sapiens Bardet-Biedl syndrome 12 (BBS12), mRNA.
ILMN_2230035	BBS2	0	0	0.0424333	NA	212.453	6.37461	199.667	NA	1.06403	NA	0.0895447	2	2	2	2	2	2	0.551912	0.69456	Homo sapiens Bardet-Biedl syndrome 2 (BBS2), mRNA.
ILMN_1762466	BBS4	0	0	0.191191	NA	204.631	27.6645	263.922	NA	0.775345	NA	-0.367089	2	2	2	2	2	2	0.0330201	0.194926	Homo sapiens Bardet-Biedl syndrome 4 (BBS4), mRNA.
ILMN_1663592	BBS5	0.182982	0.13253	0.0401461	NA	77.7935	2.20837	81.0336	NA	0.960015	NA	-0.0588704	2	2	2	2	2	2	0.689746	0.736921	PREDICTED: Homo sapiens Bardet-Biedl syndrome 5, transcript variant 2 (BBS5), mRNA.
ILMN_1711053	BBS5	0.623494	0.597892	0.00206413	NA	67.964	0.0991977	68.6781	NA	0.989603	NA	-0.0150783	2	2	2	2	2	2	0.918683	0.785678	PREDICTED: Homo sapiens Bardet-Biedl syndrome 5, transcript variant 2 (BBS5), mRNA.
ILMN_2299737	BBS5	0.0670181	0.233434	0.0209754	NA	86.6269	1.28483	76.9413	NA	1.12588	NA	0.171056	2	2	2	2	2	2	0.256314	0.54009	Homo sapiens Bardet-Biedl syndrome 5 (BBS5), mRNA.
ILMN_1703111	BBS7	0.472892	0.564759	0.0960782	NA	71.1724	4.83528	69.2968	NA	1.02707	NA	0.0385289	2	2	2	2	2	2	0.818104	0.767262	Homo sapiens Bardet-Biedl syndrome 7 (BBS7), transcript variant 2, mRNA.
ILMN_2257833	BBS7	0.00150602	0.0060241	0.19858	NA	139.902	19.6446	125.37	NA	1.11591	NA	0.158219	2	2	2	2	2	2	0.399428	0.632379	Homo sapiens Bardet-Biedl syndrome 7 (BBS7), transcript variant 1, mRNA.
ILMN_2377056	BBS7	0.825301	0.987952	0.0114763	NA	63.8886	0.518455	54.8559	NA	1.16466	NA	0.219912	2	2	2	2	2	2	0.148143	0.429934	Homo sapiens Bardet-Biedl syndrome 7 (BBS7), transcript variant 2, mRNA.
ILMN_2352159	BBS9	0.451807	0.230422	0.0267579	NA	70.7661	1.33895	77.1472	NA	0.917288	NA	-0.124554	2	2	2	2	2	2	0.403797	0.633694	Homo sapiens Bardet-Biedl syndrome 9 (BBS9), transcript variant 2, mRNA.
ILMN_1745415	BBX	0	0	0.145171	NA	354.409	36.3806	372.738	NA	0.950825	NA	-0.0727486	2	2	2	2	2	2	0.615256	0.715795	Homo sapiens bobby sox homolog (Drosophila) (BBX), mRNA.
ILMN_1790455	BCAM	0.365964	0.271084	0.0157451	NA	72.4056	0.806128	76.1035	NA	0.951409	NA	-0.0718617	2	2	2	2	2	2	0.627548	0.719353	Homo sapiens basal cell adhesion molecule (Lutheran blood group) (BCAM), transcript variant 1, mRNA.
ILMN_1705653	BCAM	0.439759	0.628012	0.0413235	NA	71.1841	2.08001	68.0754	NA	1.04567	NA	0.0644218	2	2	2	2	2	2	0.668551	0.732084	Homo sapiens basal cell adhesion molecule (Lutheran blood group) (BCAM), transcript variant 2, mRNA.
ILMN_2320280	BCAM	0.394578	0.513554	0.102015	NA	73.4607	5.29912	70.2478	NA	1.04574	NA	0.0645194	2	2	2	2	2	2	0.692986	0.737988	Homo sapiens basal cell adhesion molecule (Lutheran blood group) (BCAM), transcript variant 1, mRNA.
ILMN_2246131	BCAN	0.590361	0.0798193	0.119141	NA	68.2035	5.74584	85.1863	NA	0.800639	NA	-0.320776	2	2	2	2	2	2	0.0473154	0.239755	Homo sapiens brevican (BCAN), transcript variant 2, mRNA.
ILMN_1680300	BCAN	0.0451807	0.0150602	0.00911823	NA	90.4	0.58286	105.718	NA	0.855106	NA	-0.225826	2	2	2	2	2	2	0.137924	0.414884	Homo sapiens brevican (BCAN), transcript variant 1, mRNA.
ILMN_1732154	BCAN	0.225151	0.334337	0.0474799	NA	76.5932	2.57149	74.3812	NA	1.02974	NA	0.0422785	2	2	2	2	2	2	0.780977	0.75801	Homo sapiens brevican (BCAN), transcript variant 1, mRNA.
ILMN_1705568	BCAP29	0.373494	0.153614	0.0477344	NA	72.6038	2.45062	79.891	NA	0.908786	NA	-0.137988	2	2	2	2	2	2	0.357036	0.609263	Homo sapiens B-cell receptor-associated protein 29 (BCAP29), transcript variant 4, mRNA.
ILMN_2266334	BCAP29	0.921687	0.807229	0.00795623	NA	61.0125	0.343251	64.0669	NA	0.952324	NA	-0.070475	2	2	2	2	2	2	0.634231	0.721485	Homo sapiens B-cell receptor-associated protein 29 (BCAP29), transcript variant 1, mRNA.
ILMN_1715928	BCAP29	0.263554	0.304217	0.0229687	NA	75.1572	1.22065	75.3313	NA	0.997689	NA	-0.00333814	2	2	2	2	2	2	0.980978	0.798514	Homo sapiens B-cell receptor-associated protein 29 (BCAP29), transcript variant 4, mRNA.
ILMN_2342084	BCAP29	0	0	0.114601	NA	198.651	16.0977	172.941	NA	1.14866	NA	0.19995	2	2	2	2	2	2	0.217593	0.504474	Homo sapiens B-cell receptor-associated protein 29 (BCAP29), transcript variant 2, mRNA.
ILMN_1697642	BCAP29	0	0	0.0386252	NA	222.415	6.07463	192.609	NA	1.15475	NA	0.207578	2	2	2	2	2	2	0.174088	0.462748	Homo sapiens B-cell receptor-associated protein 29 (BCAP29), transcript variant 1, mRNA.
ILMN_1737380	BCAP29	0.000753012	0.0060241	0.0223473	NA	155.627	2.45922	121.323	NA	1.28276	NA	0.359248	2	2	2	2	2	2	0.0237582	0.159413	Homo sapiens B-cell receptor-associated protein 29 (BCAP29), transcript variant 3, mRNA.
ILMN_1812403	BCAP31	0	0	0.141147	NA	3705.38	369.818	3938.3	NA	0.940857	NA	-0.0879526	2	2	2	2	2	2	0.550834	0.694306	Homo sapiens B-cell receptor-associated protein 31 (BCAP31), mRNA.
ILMN_1672596	BCAR1	0	0	0.0344045	NA	202.291	4.92127	193.217	NA	1.04696	NA	0.0662081	2	2	2	2	2	2	0.658337	0.728963	Homo sapiens breast cancer anti-estrogen resistance 1 (BCAR1), mRNA.
ILMN_1763638	BCAR3	0.000753012	0.0060241	0.0739392	NA	166.224	8.69067	117.829	NA	1.41072	NA	0.496431	2	2	2	2	2	2	0.00359813	0.0477244	Homo sapiens breast cancer anti-estrogen resistance 3 (BCAR3), mRNA.
ILMN_1733042	BCAS1	0.301958	0.311747	0.00591926	NA	73.9118	0.309362	75.0089	NA	0.985374	NA	-0.0212565	2	2	2	2	2	2	0.885533	0.781063	Homo sapiens breast carcinoma amplified sequence 1 (BCAS1), mRNA.
[truncated: 22,605 more rows]

## Sheet: B)let7_vs_negcon.test_results
Name	SYMBOL	meanbgt	meanbgc	cvt	cvc	meant	stderrt	meanc	stderrc	ratio	ratiose	logratio	tp	t2p	wilcoxonp	tq	t2q	wilcoxonq	limmap	limmapa	DESCRIPTION
[truncated: 24,526 more rows]

## Sheet: C)sig. regulated genes
miR-27 sigup >1.33	miR-27 sigdown<0.75	let-7 sigup >1.33	let-7 sigdown<0.75
[truncated: 1,730 more rows]

[truncated: 1 more sheets: D)DiffQ0.05common]
